# Supplementary material for: An enzymatic platform for the asymmetric amination of primary, secondary and tertiary C(sp3)–H bonds
Source: Springer Nature journal article supplement (doi:10.1038/s41557-019-0343-5), 2019-10-14
Supplement: 41557_2019_343_MOESM16_ESM.mol [file 41557_2019_343_MOESM16_ESM.mol]

nchem.19040731B-comp2a.mol
  ChemDraw08281911042D

 14 15  0  0  1  0  0  0  0  0999 V2000
   -0.0235    0.0739    0.0000 C   0  0  0  0  0  0  0  0  0  0  0  0
    0.8025    0.0774    0.0000 C   0  0  0  0  0  0  0  0  0  0  0  0
    1.0547    0.8633    0.0000 N   0  0  0  0  0  0  0  0  0  0  0  0
    0.3852    1.3459    0.0000 S   0  0  0  0  0  0  0  0  0  0  0  0
   -0.2809    0.8581    0.0000 N   0  0  0  0  0  0  0  0  0  0  0  0
    0.8679    2.0155    0.0000 O   0  0  0  0  0  0  0  0  0  0  0  0
   -0.1364    1.9851    0.0000 O   0  0  0  0  0  0  0  0  0  0  0  0
   -0.5056   -0.5956    0.0000 C   0  0  0  0  0  0  0  0  0  0  0  0
   -1.3259   -0.5125    0.0000 C   0  0  0  0  0  0  0  0  0  0  0  0
   -1.8074   -1.1809    0.0000 C   0  0  0  0  0  0  0  0  0  0  0  0
   -1.4698   -1.9318    0.0000 C   0  0  0  0  0  0  0  0  0  0  0  0
   -0.6500   -2.0155    0.0000 C   0  0  0  0  0  0  0  0  0  0  0  0
   -0.1680   -1.3471    0.0000 C   0  0  0  0  0  0  0  0  0  0  0  0
    1.8074    1.2015    0.0000 C   0  0  0  0  0  0  0  0  0  0  0  0
 12 13  2  0      
 11 12  1  0      
 10 11  2  0      
  9 10  1  0      
  8  9  2  0      
  8 13  1  0      
  1  8  1  0      
  3 14  1  0      
  1  2  1  0      
  2  3  1  0      
  3  4  1  0      
  4  5  1  0      
  1  5  1  6      
  4  6  2  0      
  4  7  2  0      
M  STY  1   1 SUP
M  SLB  1   1   1
M  SAL   1  6   8   9  10  11  12  13
M  SBL   1  1   7
M  SMT   1 Ph
M  SBV   1   7    0.4821    0.6695
M  STY  1   2 SUP
M  SLB  1   2   2
M  SAL   2  1  14
M  SBL   2  1   8
M  SMT   2 Me
M  SBV   2   8   -0.7527   -0.3382
M  END
