# Supplementary material for: An enzymatic platform for the asymmetric amination of primary, secondary and tertiary C(sp3)–H bonds
Source: Springer Nature journal article supplement (doi:10.1038/s41557-019-0343-5), 2019-10-14
Supplement: MOESM136 [file 41557_2019_343_MOESM136_ESM.cif]

data_d19031
_audit_creation_date               2019-03-17
_audit_creation_method
;
Olex2 1.2
(compiled 2018.05.29 svn.r3508 for OlexSys, GUI svn.r5506),
 SHELXL-2018/3, and manual edit
;
_database_code_depnum_ccdc_archive ?
_audit_contact_author_name         'Xray Staff'
_audit_contact_author_email        xray@caltech.edu
_audit_contact_author_address      
;
Beckman Institute
Caltech 139-74
Pasadena CA 91125
USA
;
_audit_contact_author_phone        16263952741
_shelx_SHELXL_version_number       2018/3
_publ_contact_author_id_orcid      ?
_publ_section_references
;
Dolomanov, O.V., Bourhis, L.J., Gildea, R.J, Howard, J.A.K. & Puschmann, H.
 (2009), J. Appl. Cryst. 42, 339-341.

Sheldrick, G.M. (2008). Acta Cryst. A64, 112-122.
;
_chemical_name_common              ?
_chemical_name_systematic          ?
_chemical_formula_moiety           'C11 H16 N2 O2 S'
_chemical_formula_sum              'C11 H16 N2 O2 S'
_chemical_formula_weight           240.32
_chemical_absolute_configuration   ad
_chemical_melting_point            ?
loop_
  _atom_type_symbol
  _atom_type_description
  _atom_type_scat_dispersion_real
  _atom_type_scat_dispersion_imag
  _atom_type_scat_source
 'C' 'C' 0.0033 0.0016 'International Tables Vol C Tables 4.2.6.8 and 6.1.1.4'
 'H' 'H' 0.0000 0.0000 'International Tables Vol C Tables 4.2.6.8 and 6.1.1.4'
 'N' 'N' 0.0061 0.0033 'International Tables Vol C Tables 4.2.6.8 and 6.1.1.4'
 'O' 'O' 0.0106 0.0060 'International Tables Vol C Tables 4.2.6.8 and 6.1.1.4'
 'S' 'S' 0.1246 0.1234 'International Tables Vol C Tables 4.2.6.8 and 6.1.1.4'

_shelx_space_group_comment
;
The symmetry employed for this shelxl refinement is uniquely defined
by the following loop, which should always be used as a source of
symmetry information in preference to the above space-group names.
They are only intended as comments.
;
_space_group_crystal_system        'monoclinic'
_space_group_IT_number             5
_space_group_name_H-M_alt          'C 1 2 1'
_space_group_name_Hall             'C 2y'
loop_
  _space_group_symop_operation_xyz
 'x, y, z'
 '-x, y, -z'
 'x+1/2, y+1/2, z'
 '-x+1/2, y+1/2, -z'

_cell_length_a                     17.277(8)
_cell_length_b                     6.4054(14)
_cell_length_c                     11.991(3)
_cell_angle_alpha                  90
_cell_angle_beta                   118.590(14)
_cell_angle_gamma                  90
_cell_volume                       1165.2(7)
_cell_formula_units_Z              4
_cell_measurement_reflns_used      9931
_cell_measurement_temperature      100
_cell_measurement_theta_max        37.57
_cell_measurement_theta_min        2.45
_shelx_estimated_absorpt_T_max     0.956
_shelx_estimated_absorpt_T_min     0.879
_exptl_absorpt_coefficient_mu      0.265
_exptl_absorpt_correction_T_max    1.0000
_exptl_absorpt_correction_T_min    0.9543
_exptl_absorpt_correction_type     multi-scan
_exptl_absorpt_process_details
;
SADABS-2016/2 (Bruker,2016/2) was used for absorption correction. 
wR2(int) was 0.0449 before and 0.0415 after correction. 
The Ratio of minimum to maximum transmission is 0.9543. 
The \l/2 correction factor is Not present.
;
_exptl_absorpt_special_details     ?
_exptl_crystal_colour              colourless
_exptl_crystal_colour_primary      colourless
_exptl_crystal_density_diffrn      1.370
_exptl_crystal_density_meas        ?
_exptl_crystal_density_method      ?
_exptl_crystal_description         'block'
_exptl_crystal_F_000               512
_exptl_crystal_size_max            0.50
_exptl_crystal_size_mid            0.26
_exptl_crystal_size_min            0.17
loop_
 _exptl_crystal_face_index_h
 _exptl_crystal_face_index_k
 _exptl_crystal_face_index_l
 _exptl_crystal_face_perp_dist
     -1.00  0.00  1.00     0.091 
      0.00  0.00  1.00     0.080 
      0.00  0.00 -1.00     0.125 
      1.00  0.00  0.00     0.046 
     -1.00  0.00  0.00     0.093 
     -1.00 -1.00 -1.00     0.169 
     -2.00  1.00  2.00     0.190 
      2.00  1.00  1.00     0.146 
      1.00  1.00  0.00     0.211 
     -1.00 -1.00  0.00     0.164 
      2.00  0.00 -1.00     0.089 
     -2.00  0.00  1.00     0.082 
      1.00  1.00 -1.00     0.226 
     -1.00  1.00  0.00     0.251 
     -1.00  2.00 -2.00     0.246 
_exptl_transmission_factor_max     ?
_exptl_transmission_factor_min     ?
_diffrn_reflns_av_R_equivalents    0.0285
_diffrn_reflns_av_unetI/netI       0.0174
_diffrn_reflns_Laue_measured_fraction_full  0.997
_diffrn_reflns_Laue_measured_fraction_max  0.978
_diffrn_reflns_limit_h_max         29
_diffrn_reflns_limit_h_min         -29
_diffrn_reflns_limit_k_max         10
_diffrn_reflns_limit_k_min         -10
_diffrn_reflns_limit_l_max         20
_diffrn_reflns_limit_l_min         -20
_diffrn_reflns_number              37299
_diffrn_reflns_point_group_measured_fraction_full  0.999
_diffrn_reflns_point_group_measured_fraction_max  0.966
_diffrn_reflns_theta_full          25.242
_diffrn_reflns_theta_max           37.654
_diffrn_reflns_theta_min           1.934
_diffrn_ambient_temperature        100
_diffrn_detector                   'CMOS Area Detector'
_diffrn_detector_area_resol_mean   10.24
_diffrn_detector_type              'Bruker PHOTON 100'
_diffrn_measured_fraction_theta_full  0.997
_diffrn_measured_fraction_theta_max  0.978
_diffrn_measurement_device         '\k-geometry diffractometer'
_diffrn_measurement_device_type    'Bruker D8 Kappa'
_diffrn_measurement_method         '\w and \f scans'
_diffrn_radiation_monochromator    'Triumph focusing graphite'
_diffrn_radiation_type             MoK\a
_diffrn_radiation_wavelength       0.71073
_diffrn_source                     'sealed tube'
_diffrn_source_current             30
_diffrn_source_power               1.5
_diffrn_source_target              Mo
_diffrn_source_type                'Siemens KFF Mo 2K-90'
_diffrn_source_voltage             50
_diffrn_standards_interval_count   .
_diffrn_standards_interval_time    .
_diffrn_standards_number           0
_reflns_Friedel_coverage           0.851
_reflns_Friedel_fraction_full      1.000
_reflns_Friedel_fraction_max       0.954
_reflns_number_gt                  5846
_reflns_number_total               5984
_reflns_special_details
;
 Reflections were merged by SHELXL according to the crystal
 class for the calculation of statistics and refinement.
 
 _reflns_Friedel_fraction is defined as the number of unique
 Friedel pairs measured divided by the number that would be
 possible theoretically, ignoring centric projections and
 systematic absences.
;
_reflns_threshold_expression       'I > 2\s(I)'
_computing_data_collection        'BIS 2018.9.0.2/05-Oct-2018 & APEX3_2018.7-2 (Bruker-AXS, 2018)'
_computing_cell_refinement        'SAINT V8.38A (Bruker-AXS, 2016)'
_computing_data_reduction         'SAINT V8.38A (Bruker-AXS, 2016)'
_computing_structure_solution     'SHELXT-2014/5 (Sheldrick, 2013)'
_computing_structure_refinement   'SHELXL-2018/3 (Sheldrick, 2015)'
_computing_molecular_graphics     'DIAMOND 3 (Crystal Impact, 1999)'
_computing_publication_material   'Olex2 (Dolomanov et al., 2009)'
_refine_diff_density_max           0.433
_refine_diff_density_min           -0.467
_refine_diff_density_rms           0.052
_refine_ls_abs_structure_details
;
 Flack x determined using 2643 quotients [(I+)-(I-)]/[(I+)+(I-)]
 (Parsons, Flack and Wagner, Acta Cryst. B69 (2013) 249-259).
;
_refine_ls_abs_structure_Flack     0.018(7)
_refine_ls_abs_structure_Hooft     0.022(8)
_refine_ls_extinction_coef         0.0107(17)
_refine_ls_extinction_expression  
 'Fc^*^=kFc[1+0.001xFc^2^\l^3^/sin(2\q)]^-1/4^'
_refine_ls_extinction_method       'SHELXL-2018/3 (Sheldrick 2018)'
_refine_ls_goodness_of_fit_ref     1.071
_refine_ls_hydrogen_treatment      refxyz
_refine_ls_matrix_type             full
_refine_ls_number_parameters       194
_refine_ls_number_reflns           5984
_refine_ls_number_restraints       1
_refine_ls_R_factor_all            0.0278
_refine_ls_R_factor_gt             0.0270
_refine_ls_restrained_S_all        1.071
_refine_ls_shift/su_max            0.001
_refine_ls_shift/su_mean           0.000
_refine_ls_structure_factor_coef   Fsqd
_refine_ls_weighting_details      
 'w=1/[\s^2^(Fo^2^)+(0.0377P)^2^+0.4032P] where P=(Fo^2^+2Fc^2^)/3'
_refine_ls_weighting_scheme        calc
_refine_ls_wR_factor_gt            0.0706
_refine_ls_wR_factor_ref           0.0713
_refine_special_details            ?
_olex2_refinement_description
;
1. Fixed Uiso
 At 1.2 times of:
  All C(H) groups, All C(H,H) groups, All N(H) groups
 At 1.5 times of:
  All C(H,H,H) groups
;
_atom_sites_solution_hydrogens     difmap
_atom_sites_solution_primary       ?
_atom_sites_solution_secondary     ?
loop_
  _atom_site_label
  _atom_site_type_symbol
  _atom_site_fract_x
  _atom_site_fract_y
  _atom_site_fract_z
  _atom_site_U_iso_or_equiv
  _atom_site_adp_type
  _atom_site_occupancy
  _atom_site_site_symmetry_order
  _atom_site_calc_flag
  _atom_site_refinement_flags_posn
  _atom_site_refinement_flags_adp
  _atom_site_refinement_flags_occupancy
  _atom_site_disorder_assembly
  _atom_site_disorder_group
 S1 S 0.57909(2) 0.78387(4) 0.89358(2) 0.01487(6) Uani 1 1 d . . . . .
 O1 O 0.61305(6) 0.85189(14) 1.02280(8) 0.01883(14) Uani 1 1 d . . . . .
 O2 O 0.61972(7) 0.86747(18) 0.82299(10) 0.02629(19) Uani 1 1 d . . . . .
 N1 N 0.47486(6) 0.83763(14) 0.81757(9) 0.01647(15) Uani 1 1 d . . . . .
 H1 H 0.4525(13) 0.824(3) 0.8700(18) 0.020 Uiso 1 1 d R . . . .
 N2 N 0.57968(5) 0.52686(15) 0.89357(8) 0.01461(14) Uani 1 1 d . . . . .
 C1 C 0.43242(6) 0.49812(16) 0.69694(9) 0.01362(14) Uani 1 1 d . . . . .
 C2 C 0.53073(7) 0.43990(19) 0.76310(11) 0.01723(17) Uani 1 1 d . . . . .
 H2A H 0.5382(13) 0.279(4) 0.7733(18) 0.021 Uiso 1 1 d R . . . .
 H2B H 0.5590(13) 0.483(3) 0.7120(19) 0.021 Uiso 1 1 d R . . . .
 C3 C 0.66908(7) 0.4376(2) 0.96503(13) 0.0230(2) Uani 1 1 d . . . . .
 H3A H 0.7023(17) 0.456(4) 0.919(2) 0.034 Uiso 1 1 d R . . . .
 H3B H 0.6634(15) 0.278(4) 0.970(2) 0.034 Uiso 1 1 d R . . . .
 H3C H 0.6973(16) 0.504(4) 1.044(2) 0.034 Uiso 1 1 d R . . . .
 C4 C 0.42575(8) 0.73771(16) 0.69201(10) 0.01845(18) Uani 1 1 d . . . . .
 H4A H 0.4506(13) 0.779(4) 0.6390(18) 0.022 Uiso 1 1 d R . . . .
 H4B H 0.3668(13) 0.785(4) 0.6599(18) 0.022 Uiso 1 1 d R . . . .
 C5 C 0.38799(7) 0.41182(18) 0.56151(10) 0.01727(17) Uani 1 1 d . . . . .
 C6 C 0.32376(9) 0.5222(3) 0.45892(13) 0.0345(4) Uani 1 1 d . . . . .
 H6 H 0.3081(17) 0.649(5) 0.472(2) 0.041 Uiso 1 1 d R . . . .
 C7 C 0.28432(9) 0.4389(3) 0.33658(13) 0.0347(4) Uani 1 1 d . . . . .
 H7 H 0.2394(17) 0.531(5) 0.263(2) 0.042 Uiso 1 1 d R . . . .
 C8 C 0.30723(9) 0.2438(2) 0.31487(11) 0.0239(2) Uani 1 1 d . . . . .
 H8 H 0.2815(16) 0.189(4) 0.231(2) 0.029 Uiso 1 1 d R . . . .
 C9 C 0.36951(18) 0.1312(2) 0.41495(14) 0.0483(6) Uani 1 1 d . . . . .
 H9 H 0.387(2) 0.013(5) 0.403(3) 0.058 Uiso 1 1 d R . . . .
 C10 C 0.40987(17) 0.2158(2) 0.53709(13) 0.0468(6) Uani 1 1 d . . . . .
 H10 H 0.455(2) 0.138(6) 0.601(3) 0.056 Uiso 1 1 d R . . . .
 C11 C 0.38811(7) 0.40552(16) 0.77042(11) 0.01571(16) Uani 1 1 d . . . . .
 H11A H 0.3951(13) 0.260(3) 0.7750(18) 0.024 Uiso 1 1 d R . . . .
 H11B H 0.3233(14) 0.444(4) 0.728(2) 0.024 Uiso 1 1 d R . . . .
 H11C H 0.4143(14) 0.461(3) 0.858(2) 0.024 Uiso 1 1 d R . . . .

loop_
  _atom_site_aniso_label
  _atom_site_aniso_U_11
  _atom_site_aniso_U_22
  _atom_site_aniso_U_33
  _atom_site_aniso_U_23
  _atom_site_aniso_U_13
  _atom_site_aniso_U_12
 S1 0.01647(10) 0.01358(9) 0.01303(9) -0.00301(8) 0.00583(7) -0.00545(8)
 O1 0.0203(3) 0.0174(3) 0.0142(3) -0.0057(3) 0.0046(3) -0.0043(3)
 O2 0.0289(4) 0.0298(5) 0.0223(4) -0.0036(3) 0.0139(3) -0.0158(4)
 N1 0.0187(4) 0.0120(3) 0.0142(3) -0.0010(2) 0.0043(3) -0.0004(3)
 N2 0.0111(3) 0.0135(3) 0.0160(3) -0.0042(3) 0.0039(3) -0.0009(2)
 C1 0.0130(3) 0.0146(3) 0.0122(3) -0.0027(3) 0.0052(3) -0.0032(3)
 C2 0.0129(3) 0.0201(4) 0.0181(4) -0.0092(3) 0.0069(3) -0.0034(3)
 C3 0.0119(4) 0.0246(5) 0.0252(5) -0.0074(4) 0.0030(3) 0.0023(3)
 C4 0.0220(4) 0.0145(4) 0.0125(4) 0.0003(3) 0.0030(3) -0.0025(3)
 C5 0.0171(4) 0.0203(4) 0.0130(4) -0.0041(3) 0.0061(3) -0.0076(3)
 C6 0.0191(5) 0.0518(9) 0.0178(5) -0.0140(5) -0.0030(4) 0.0145(5)
 C7 0.0194(5) 0.0558(10) 0.0162(5) -0.0121(5) -0.0016(4) 0.0086(6)
 C8 0.0257(5) 0.0308(6) 0.0148(4) -0.0081(4) 0.0094(4) -0.0149(4)
 C9 0.0901(15) 0.0164(5) 0.0170(5) -0.0070(4) 0.0082(7) -0.0033(7)
 C10 0.0880(15) 0.0129(4) 0.0137(5) -0.0035(4) 0.0036(7) 0.0004(7)
 C11 0.0146(4) 0.0163(4) 0.0177(4) -0.0010(3) 0.0089(3) -0.0014(3)

_geom_special_details
;
 All esds (except the esd in the dihedral angle between two l.s. planes)
 are estimated using the full covariance matrix.  The cell esds are taken
 into account individually in the estimation of esds in distances, angles
 and torsion angles; correlations between esds in cell parameters are only
 used when they are defined by crystal symmetry.  An approximate (isotropic)
 treatment of cell esds is used for estimating esds involving l.s. planes.
;
loop_
  _geom_bond_atom_site_label_1
  _geom_bond_atom_site_label_2
  _geom_bond_distance
  _geom_bond_site_symmetry_2
  _geom_bond_publ_flag
 S1 O1 1.4370(9) . ?
 S1 O2 1.4368(10) . ?
 S1 N1 1.6190(12) . ?
 S1 N2 1.6463(10) . ?
 N1 H1 0.885(19) . ?
 N1 C4 1.4744(14) . ?
 N2 C2 1.4854(14) . ?
 N2 C3 1.4766(16) . ?
 C1 C2 1.5374(16) . ?
 C1 C4 1.5380(16) . ?
 C1 C5 1.5294(14) . ?
 C1 C11 1.5361(15) . ?
 C2 H2A 1.04(3) . ?
 C2 H2B 0.99(2) . ?
 C3 H3A 0.98(2) . ?
 C3 H3B 1.03(3) . ?
 C3 H3C 0.93(3) . ?
 C4 H4A 0.96(2) . ?
 C4 H4B 0.95(2) . ?
 C5 C6 1.3923(19) . ?
 C5 C10 1.382(2) . ?
 C6 H6 0.90(3) . ?
 C6 C7 1.3945(19) . ?
 C7 H7 1.03(3) . ?
 C7 C8 1.373(2) . ?
 C8 H8 0.95(2) . ?
 C8 C9 1.372(2) . ?
 C9 H9 0.86(3) . ?
 C9 C10 1.395(2) . ?
 C10 H10 0.93(3) . ?
 C11 H11A 0.94(2) . ?
 C11 H11B 1.01(2) . ?
 C11 H11C 0.99(2) . ?

loop_
  _geom_angle_atom_site_label_1
  _geom_angle_atom_site_label_2
  _geom_angle_atom_site_label_3
  _geom_angle
  _geom_angle_site_symmetry_1
  _geom_angle_site_symmetry_3
  _geom_angle_publ_flag
 O1 S1 N1 108.22(5) . . ?
 O1 S1 N2 107.69(5) . . ?
 O2 S1 O1 117.37(6) . . ?
 O2 S1 N1 108.33(7) . . ?
 O2 S1 N2 111.58(6) . . ?
 N1 S1 N2 102.59(5) . . ?
 S1 N1 H1 109.0(13) . . ?
 C4 N1 S1 115.09(8) . . ?
 C4 N1 H1 116.6(13) . . ?
 C2 N2 S1 112.00(8) . . ?
 C3 N2 S1 113.08(8) . . ?
 C3 N2 C2 112.10(9) . . ?
 C2 C1 C4 107.81(8) . . ?
 C5 C1 C2 109.23(8) . . ?
 C5 C1 C4 109.24(9) . . ?
 C5 C1 C11 109.56(8) . . ?
 C11 C1 C2 109.95(9) . . ?
 C11 C1 C4 111.02(9) . . ?
 N2 C2 C1 112.59(8) . . ?
 N2 C2 H2A 105.8(11) . . ?
 N2 C2 H2B 110.3(12) . . ?
 C1 C2 H2A 110.2(11) . . ?
 C1 C2 H2B 111.4(12) . . ?
 H2A C2 H2B 106.3(16) . . ?
 N2 C3 H3A 111.0(15) . . ?
 N2 C3 H3B 108.4(13) . . ?
 N2 C3 H3C 107.9(16) . . ?
 H3A C3 H3B 104(2) . . ?
 H3A C3 H3C 111(2) . . ?
 H3B C3 H3C 114(2) . . ?
 N1 C4 C1 113.45(8) . . ?
 N1 C4 H4A 109.6(13) . . ?
 N1 C4 H4B 104.9(13) . . ?
 C1 C4 H4A 104.6(16) . . ?
 C1 C4 H4B 112.3(15) . . ?
 H4A C4 H4B 112.2(18) . . ?
 C6 C5 C1 122.51(11) . . ?
 C10 C5 C1 120.27(11) . . ?
 C10 C5 C6 117.22(11) . . ?
 C5 C6 H6 118.9(17) . . ?
 C5 C6 C7 121.10(14) . . ?
 C7 C6 H6 120.0(17) . . ?
 C6 C7 H7 117.6(15) . . ?
 C8 C7 C6 120.53(14) . . ?
 C8 C7 H7 121.9(15) . . ?
 C7 C8 H8 120.3(15) . . ?
 C9 C8 C7 119.28(12) . . ?
 C9 C8 H8 120.4(15) . . ?
 C8 C9 H9 121(2) . . ?
 C8 C9 C10 120.19(15) . . ?
 C10 C9 H9 119(2) . . ?
 C5 C10 C9 121.67(15) . . ?
 C5 C10 H10 121(2) . . ?
 C9 C10 H10 117(2) . . ?
 C1 C11 H11A 109.4(12) . . ?
 C1 C11 H11B 110.9(12) . . ?
 C1 C11 H11C 111.6(12) . . ?
 H11A C11 H11B 110.4(18) . . ?
 H11A C11 H11C 108.4(18) . . ?
 H11B C11 H11C 106.0(17) . . ?

loop_
  _geom_hbond_atom_site_label_D
  _geom_hbond_atom_site_label_H
  _geom_hbond_atom_site_label_A
  _geom_hbond_distance_DH
  _geom_hbond_distance_HA
  _geom_hbond_distance_DA
  _geom_hbond_angle_DHA
  _geom_hbond_site_symmetry_A
  _geom_hbond_publ_flag
 N1 H1 O1 0.885(19) 2.089(19) 2.9599(16) 167.8(19) 2_657 yes

loop_
  _geom_torsion_atom_site_label_1
  _geom_torsion_atom_site_label_2
  _geom_torsion_atom_site_label_3
  _geom_torsion_atom_site_label_4
  _geom_torsion
  _geom_torsion_site_symmetry_1
  _geom_torsion_site_symmetry_2
  _geom_torsion_site_symmetry_3
  _geom_torsion_site_symmetry_4
  _geom_torsion_publ_flag
 S1 N1 C4 C1 57.59(12) . . . . ?
 S1 N2 C2 C1 -62.76(11) . . . . ?
 O1 S1 N1 C4 -167.14(8) . . . . ?
 O1 S1 N2 C2 169.43(7) . . . . ?
 O1 S1 N2 C3 -62.74(9) . . . . ?
 O2 S1 N1 C4 64.62(9) . . . . ?
 O2 S1 N2 C2 -60.39(9) . . . . ?
 O2 S1 N2 C3 67.44(10) . . . . ?
 N1 S1 N2 C2 55.38(8) . . . . ?
 N1 S1 N2 C3 -176.79(8) . . . . ?
 N2 S1 N1 C4 -53.48(9) . . . . ?
 C1 C5 C6 C7 -179.82(15) . . . . ?
 C1 C5 C10 C9 178.9(2) . . . . ?
 C2 C1 C4 N1 -55.31(12) . . . . ?
 C2 C1 C5 C6 -140.99(13) . . . . ?
 C2 C1 C5 C10 40.11(18) . . . . ?
 C3 N2 C2 C1 168.89(10) . . . . ?
 C4 C1 C2 N2 58.70(12) . . . . ?
 C4 C1 C5 C6 -23.29(16) . . . . ?
 C4 C1 C5 C10 157.81(16) . . . . ?
 C5 C1 C2 N2 177.30(9) . . . . ?
 C5 C1 C4 N1 -173.90(9) . . . . ?
 C5 C6 C7 C8 0.9(3) . . . . ?
 C6 C5 C10 C9 0.0(3) . . . . ?
 C6 C7 C8 C9 0.0(3) . . . . ?
 C7 C8 C9 C10 -0.9(3) . . . . ?
 C8 C9 C10 C5 0.9(4) . . . . ?
 C10 C5 C6 C7 -0.9(3) . . . . ?
 C11 C1 C2 N2 -62.45(12) . . . . ?
 C11 C1 C4 N1 65.17(12) . . . . ?
 C11 C1 C5 C6 98.52(15) . . . . ?
 C11 C1 C5 C10 -80.38(17) . . . . ?

_shelx_res_file
;
TITL d19031 in C2
    d19031.res
    created by SHELXL-2018/3 at 01:32:06 on 17-Mar-2019
CELL 0.71073 17.2771 6.4054 11.9908 90 118.5905 90
ZERR 4 0.0077 0.0014 0.0032 0 0.0135 0
LATT -7
SYMM -X,+Y,-Z
SFAC C H N O S
UNIT 44 64 8 8 4
EQIV $1 1-X,+Y,2-Z

L.S. 25
PLAN  20
SIZE 0.17 0.26 0.5
TEMP -173.15
HTAB N1 O1_$1
BOND $H
list 4
wpdb
htab
conf
fmap -2
acta
REM <olex2.extras>
REM <HklSrc "%.\\d19031.hkl">
REM </olex2.extras>

WGHT    0.037700    0.403200
EXTI    0.010679
FVAR       0.25275
S1    5    0.579090    0.783869    0.893578    11.00000    0.01647    0.01358 =
         0.01303   -0.00301    0.00583   -0.00545
O1    4    0.613051    0.851889    1.022805    11.00000    0.02031    0.01740 =
         0.01425   -0.00573    0.00461   -0.00429
O2    4    0.619716    0.867471    0.822987    11.00000    0.02889    0.02976 =
         0.02232   -0.00363    0.01395   -0.01582
N1    3    0.474859    0.837629    0.817571    11.00000    0.01873    0.01200 =
         0.01422   -0.00097    0.00427   -0.00040
H1    2    0.452510    0.823902    0.869951    11.00000   -1.20000
N2    3    0.579681    0.526856    0.893566    11.00000    0.01109    0.01347 =
         0.01605   -0.00417    0.00392   -0.00088
C1    1    0.432420    0.498125    0.696942    11.00000    0.01304    0.01459 =
         0.01216   -0.00273    0.00516   -0.00318
C2    1    0.530726    0.439905    0.763098    11.00000    0.01292    0.02008 =
         0.01809   -0.00920    0.00695   -0.00343
H2A   2    0.538159    0.278901    0.773335    11.00000   -1.20000
H2B   2    0.559013    0.482960    0.712022    11.00000   -1.20000
C3    1    0.669081    0.437569    0.965029    11.00000    0.01190    0.02461 =
         0.02520   -0.00744    0.00301    0.00229
H3A   2    0.702340    0.456227    0.918661    11.00000   -1.50000
H3B   2    0.663414    0.278221    0.969544    11.00000   -1.50000
H3C   2    0.697309    0.503633    1.043969    11.00000   -1.50000
C4    1    0.425748    0.737706    0.692008    11.00000    0.02196    0.01448 =
         0.01245    0.00031    0.00303   -0.00251
H4A   2    0.450621    0.779070    0.638981    11.00000   -1.20000
H4B   2    0.366770    0.784981    0.659915    11.00000   -1.20000
C5    1    0.387988    0.411822    0.561510    11.00000    0.01709    0.02031 =
         0.01299   -0.00411    0.00607   -0.00762
C6    1    0.323757    0.522237    0.458922    11.00000    0.01913    0.05177 =
         0.01778   -0.01398   -0.00300    0.01447
H6    2    0.308075    0.649378    0.472390    11.00000   -1.20000
C7    1    0.284317    0.438876    0.336581    11.00000    0.01938    0.05580 =
         0.01620   -0.01210   -0.00164    0.00858
H7    2    0.239433    0.531432    0.263463    11.00000   -1.20000
C8    1    0.307228    0.243791    0.314866    11.00000    0.02573    0.03077 =
         0.01475   -0.00814    0.00939   -0.01490
H8    2    0.281461    0.188955    0.230974    11.00000   -1.20000
C9    1    0.369507    0.131243    0.414952    11.00000    0.09008    0.01640 =
         0.01695   -0.00705    0.00821   -0.00331
H9    2    0.387358    0.013167    0.402552    11.00000   -1.20000
C10   1    0.409870    0.215833    0.537086    11.00000    0.08796    0.01294 =
         0.01372   -0.00351    0.00357    0.00039
H10   2    0.454937    0.138429    0.600537    11.00000   -1.20000
C11   1    0.388111    0.405522    0.770422    11.00000    0.01461    0.01631 =
         0.01770   -0.00099    0.00892   -0.00137
H11A  2    0.395104    0.259650    0.774982    11.00000   -1.50000
H11B  2    0.323271    0.443657    0.728421    11.00000   -1.50000
H11C  2    0.414297    0.461126    0.857839    11.00000   -1.50000
HKLF 4


REM  d19031 in C2
REM wR2 = 0.071257, GooF = S = 1.07140, Restrained GooF = 1.07131 for all data
REM R1 = 0.026961 for 5846 Fo > 4sig(Fo) and 0.027845 for all 5984 data
REM 194 parameters refined using 1 restraints

END

WGHT      0.0377      0.4030

REM Instructions for potential hydrogen bonds
HTAB N1 O1_$1

REM Highest difference peak  0.433,  deepest hole -0.467,  1-sigma level  0.052
Q1    1   0.3611  0.2131  0.5314  11.00000  0.05   -0.47
Q2    1   0.4537  0.2171  0.5282  11.00000  0.05   -0.44
Q3    1   0.3260  0.1293  0.4189  11.00000  0.05   -0.43
Q4    1   0.4183  0.1391  0.4180  11.00000  0.05   -0.42
Q5    1   0.4110  0.4579  0.6282  11.00000  0.05    0.36
Q6    1   0.3376  0.1664  0.3801  11.00000  0.05    0.32
Q7    1   0.3299  0.6041  0.4300  11.00000  0.05   -0.31
Q8    1   0.5986  0.8004  0.9618  11.00000  0.05    0.30
Q9    1   0.3042  0.3538  0.3267  11.00000  0.05    0.30
Q10   1   0.3517  0.4582  0.5024  11.00000  0.05    0.28
Q11   1   0.2950  0.5195  0.3098  11.00000  0.05   -0.27
Q12   1   0.3957  0.1788  0.4798  11.00000  0.05    0.26
Q13   1   0.5311  0.7995  0.8622  11.00000  0.05    0.26
Q14   1   0.4093  0.4389  0.7329  11.00000  0.05    0.25
Q15   1   0.6152  0.7984  0.8660  11.00000  0.05    0.24
Q16   1   0.4321  0.6248  0.6936  11.00000  0.05    0.23
Q17   1   0.4287  0.3503  0.5372  11.00000  0.05    0.22
Q18   1   0.4672  0.3546  0.6494  11.00000  0.05   -0.22
Q19   1   0.5774  0.6334  0.8973  11.00000  0.05    0.21
Q20   1   0.4850  0.1717  0.5894  11.00000  0.05    0.21
;
_shelx_res_checksum                41231
_shelx_hkl_file
;
   2   0   0  314.25    8.60
  -2   0   0  337.19    8.35
   4   0   0  753.92   20.10
  -4   0   0  821.41   20.12
  -6   0   0  357.64    9.55
   6   0   0  360.81    9.30
  -6   0   0  349.11    9.29
   6   0   0  369.67    9.57
  -8   0   0   54.49    1.41
  -8   0   0   54.53    1.42
   8   0   0   52.24    1.39
   8   0   0   53.54    1.42
   8   0   0   57.72    1.77
   8   0   0   56.48    2.07
  -8   0   0   55.31    1.39
  -8   0   0   56.87    1.39
  10   0   0  102.43    3.36
 -10   0   0  102.43    2.46
 -10   0   0   95.76    2.50
  10   0   0   92.98    3.31
  10   0   0  102.10    2.94
  10   0   0   97.47    2.92
  10   0   0   93.30    2.50
 -10   0   0   95.57    2.49
 -10   0   0   97.51    2.46
  12   0   0   13.97    0.36
  12   0   0   12.59    0.86
 -12   0   0   13.86    0.41
 -12   0   0   13.19    0.40
  12   0   0   13.62    1.44
  12   0   0   13.45    0.41
  12   0   0   12.52    0.86
  12   0   0   12.33    1.35
 -12   0   0   12.90    0.41
 -12   0   0   14.57    0.36
 -12   0   0   14.18    0.36
  14   0   0    0.07    0.41
  14   0   0   -0.28    0.83
 -14   0   0    0.09    0.02
 -14   0   0    0.00    0.07
 -14   0   0   -0.08    0.08
  14   0   0    0.22    0.08
  14   0   0    1.02    0.92
 -14   0   0   -0.01    0.08
  14   0   0    0.11    0.40
  16   0   0    0.68    0.59
  16   0   0   -1.89    1.14
 -16   0   0    0.09    0.08
 -16   0   0    0.02    0.09
  16   0   0    0.10    0.10
 -16   0   0    0.06    0.09
  18   0   0    4.38    0.26
 -18   0   0    4.67    0.26
 -18   0   0    4.07    0.26
 -18   0   0    4.40    0.23
 -20   0   0   70.79    1.95
 -20   0   0   71.62    1.87
  20   0   0   67.42    1.95
 -20   0   0   72.08    1.90
 -22   0   0   22.77    0.73
 -22   0   0   22.21    0.73
 -22   0   0   22.39    0.73
 -22   0   0   22.64    0.69
  22   0   0   22.43    0.73
 -22   0   0   22.24    0.68
 -24   0   0    3.22    0.36
 -24   0   0    3.03    0.28
 -24   0   0    3.55    0.36
 -24   0   0    2.92    0.34
  -1  -1   0  342.83    8.46
  -1  -1   0  350.42    8.64
  -1   1   0  305.34    8.58
   1   1   0  336.95    8.45
  -1   1   0  295.71    8.42
   1   1   0  346.77    8.63
   3  -1   0  167.19    4.20
  -3  -1   0  144.47    4.25
  -3  -1   0  149.29    4.47
   3  -1   0  168.78    4.36
   3   1   0  168.94    4.29
  -3   1   0  158.46    4.34
   3   1   0  169.01    4.52
  -3   1   0  157.43    4.19
   5  -1   0  257.07    6.75
   5  -1   0  256.85    6.95
   5   1   0  272.81    7.19
  -5   1   0  252.59    6.75
  -5   1   0  262.67    6.96
   5   1   0  260.13    6.87
   7  -1   0  128.73    3.49
  -7  -1   0  125.34    3.21
   7  -1   0  125.24    3.74
   7  -1   0  129.20    3.20
  -7  -1   0  124.23    3.21
  -7   1   0  137.59    3.20
  -7   1   0  122.00    3.21
   7   1   0  125.57    3.97
   7   1   0  125.87    3.61
   7   1   0  133.51    3.63
  -7   1   0  123.97    3.74
  -7   1   0  125.83    3.48
   7   1   0  131.77    4.00
   7   1   0  117.86    3.21
  -7   1   0  124.49    3.20
   9  -1   0   37.47    0.98
  -9  -1   0   36.38    0.98
   9  -1   0   35.98    1.61
   9  -1   0   37.49    0.96
  -9  -1   0   37.60    0.95
   9  -1   0   36.87    1.30
  -9  -1   0   37.34    0.98
  -9   1   0   36.17    0.98
  -9   1   0   41.46    0.98
   9   1   0   36.81    0.98
   9   1   0   38.07    1.42
   9   1   0   37.23    0.97
   9   1   0   38.54    0.95
   9   1   0   38.51    1.84
   9   1   0   36.35    1.82
  -9   1   0   37.54    0.97
  -9   1   0   37.42    0.98
   9   1   0   37.01    1.42
  -9   1   0   37.03    0.98
  -9   1   0   37.56    1.32
  -9   1   0   33.17    1.61
 -11  -1   0   20.53    0.58
  11  -1   0   22.15    0.55
  11  -1   0   21.76    0.98
  11  -1   0   19.91    1.37
  11  -1   0   21.11    0.58
 -11   1   0   20.23    0.55
  11   1   0   20.39    0.55
 -11   1   0   20.25    0.98
  11   1   0   19.51    1.07
  11   1   0   21.06    1.57
 -11   1   0   20.20    0.58
  11   1   0   20.06    1.07
 -11   1   0   18.96    1.41
  11   1   0   20.94    0.58
  11   1   0   21.38    1.62
  11   1   0   21.29    0.53
 -11   1   0   19.31    0.57
 -11   1   0   20.09    0.57
  13  -1   0   49.11    1.76
 -13  -1   0   43.94    1.22
  13  -1   0   47.32    1.19
  13  -1   0   46.71    1.23
 -13  -1   0   46.00    1.22
  13  -1   0   44.53    2.23
 -13   1   0   44.72    1.22
  13   1   0   45.35    1.20
  13   1   0   44.99    1.23
  13   1   0   46.99    2.60
  13   1   0   49.60    1.91
  13   1   0   44.76    2.52
 -13   1   0   46.41    1.22
 -13   1   0   45.81    1.23
  13   1   0   45.00    1.87
 -13   1   0   45.69    1.20
  15  -1   0   11.45    0.32
 -15  -1   0   10.81    0.38
  15  -1   0   11.55    0.39
 -15  -1   0   11.55    0.37
  15  -1   0   11.40    0.98
  15  -1   0   10.03    1.70
  15  -1   0   10.16    0.93
  15  -1   0   10.79    1.67
  15   1   0   10.98    1.14
  15   1   0   11.34    1.68
  15   1   0   10.94    1.09
 -15   1   0   11.85    0.36
  15   1   0    9.58    1.55
 -15   1   0   10.91    0.38
 -15   1   0   11.57    0.38
  15   1   0   11.58    0.39
 -15   1   0   11.38    0.38
 -17  -1   0    5.86    0.28
  17  -1   0    5.66    0.28
 -17  -1   0    5.87    0.28
 -17  -1   0    5.68    0.26
 -17   1   0    6.27    0.25
  17   1   0    6.03    0.28
 -17   1   0    6.03    0.28
 -17   1   0    6.11    0.28
 -17   1   0    6.05    0.28
  19  -1   0   30.91    0.89
 -19  -1   0   30.82    0.89
 -19  -1   0   30.36    0.87
 -19  -1   0   29.66    0.88
 -19   1   0   30.60    0.89
 -19   1   0   30.17    0.88
 -19   1   0   30.28    0.85
  19   1   0   30.31    0.89
 -19   1   0   30.41    0.90
 -21  -1   0   17.00    0.58
 -21  -1   0   16.27    0.57
 -21  -1   0   14.99    0.57
 -21   1   0   16.64    0.58
 -21   1   0   17.87    0.60
 -21   1   0   16.40    0.53
 -21   1   0   16.14    0.57
  21   1   0   16.74    0.58
 -21   1   0   16.62    0.57
 -23  -1   0    2.00    0.30
 -23  -1   0    2.31    0.26
 -23  -1   0    2.69    0.31
 -23  -1   0    1.76    0.21
 -23  -1   0    2.12    0.28
 -23   1   0    1.58    0.21
  23   1   0    1.68    0.21
 -23   1   0    1.98    0.22
 -23   1   0    2.63    0.32
 -25  -1   0    5.10    0.38
 -25  -1   0    4.46    0.45
 -25  -1   0    5.49    0.35
  25   1   0    4.86    0.42
 -25   1   0    5.04    0.48
 -25   1   0    5.26    0.37
   0  -2   0  777.92   20.41
   0  -2   0  819.86   20.73
   0   2   0  805.86   20.71
   2  -2   0  127.48    3.16
  -2  -2   0  122.68    3.16
  -2  -2   0  120.01    3.16
  -2  -2   0  124.57    3.52
   2  -2   0  125.96    3.16
  -2  -2   0  126.51    3.16
  -2  -2   0  123.09    3.83
   2  -2   0  125.73    3.16
   2   2   0  133.13    3.53
   2   2   0  126.77    3.16
  -2   2   0  117.28    3.17
  -2   2   0  112.00    3.16
  -2   2   0  131.14    3.16
   2   2   0  118.47    3.16
   2   2   0  129.00    3.16
  -2   2   0  123.73    3.93
  -2   2   0  133.11    3.71
   2   2   0  135.54    3.88
  -4  -2   0   77.85    1.95
   4  -2   0   72.24    1.96
  -4  -2   0   73.62    2.70
  -4  -2   0   76.24    1.95
   4  -2   0   76.78    2.24
   4  -2   0   71.37    2.47
   4  -2   0   73.62    1.96
   4  -2   0   79.20    1.95
  -4  -2   0   73.59    1.96
  -4  -2   0   81.37    2.38
  -4  -2   0   75.47    1.95
   4  -2   0   74.91    1.95
  -4  -2   0   77.73    1.95
   4   2   0   81.37    1.94
   4   2   0   85.25    2.41
  -4   2   0   77.02    2.51
  -4   2   0   72.67    1.96
   4   2   0   85.85    2.78
  -4   2   0   82.22    1.95
  -4   2   0   75.59    1.96
   4   2   0   74.96    1.96
   4   2   0   77.33    1.96
   4   2   0   77.17    1.95
  -4   2   0   76.05    1.96
  -4   2   0   75.48    1.95
   4   2   0   75.82    1.96
  -4   2   0   81.88    2.27
   4   2   0   76.69    1.95
  -6  -2   0   71.60    1.87
  -6  -2   0   71.28    1.88
   6  -2   0   75.82    1.86
   6  -2   0   73.07    2.18
  -6  -2   0   67.58    2.31
   6  -2   0   73.68    1.88
   6  -2   0   72.85    2.48
  -6  -2   0   65.81    2.70
   6  -2   0   72.86    1.86
  -6  -2   0   73.15    1.88
  -6   2   0   76.95    2.19
  -6   2   0   75.53    1.86
   6   2   0   69.73    1.88
   6   2   0   73.37    1.88
  -6   2   0   70.87    1.88
   6   2   0   81.72    1.88
  -6   2   0   71.91    1.88
   6   2   0   78.78    2.80
  -6   2   0   73.08    1.88
  -6   2   0   73.83    1.87
   6   2   0   73.03    1.87
   6   2   0   72.82    1.88
   6   2   0   81.00    2.39
  -6   2   0   76.11    2.48
   6   2   0   73.60    1.85
   8  -2   0   39.34    1.34
  -8  -2   0   38.58    1.01
  -8  -2   0   39.14    1.00
   8  -2   0   37.28    1.66
   8  -2   0   40.64    0.98
  -8  -2   0   38.81    0.98
  -8  -2   0   39.21    0.97
  -8  -2   0   40.01    0.97
   8  -2   0   39.18    1.00
  -8   2   0   37.39    0.98
  -8   2   0   37.15    0.99
   8   2   0   36.71    0.99
   8   2   0   38.29    1.53
  -8   2   0   37.59    0.97
  -8   2   0   38.82    1.70
  -8   2   0   39.29    1.35
   8   2   0   38.19    2.01
   8   2   0   37.20    1.54
   8   2   0   36.83    2.02
  -8   2   0   39.23    0.97
   8   2   0   37.26    1.00
  -8   2   0   36.88    1.01
   8   2   0   37.42    1.00
  -8   2   0   36.94    1.00
 -10  -2   0   33.32    0.89
  10  -2   0   33.03    1.66
 -10  -2   0   32.76    0.85
  10  -2   0   32.86    1.26
 -10  -2   0   30.21    0.90
  10  -2   0   32.36    0.87
 -10   2   0   33.09    1.27
 -10   2   0   34.13    0.85
  10   2   0   33.07    1.49
  10   2   0   33.49    0.88
 -10   2   0   34.29    0.84
 -10   2   0   33.20    0.88
 -10   2   0   33.85    0.85
 -10   2   0   31.22    1.66
 -10   2   0   31.47    0.88
 -10   2   0   33.75    0.87
  10   2   0   33.17    0.86
  10   2   0   32.90    2.08
 -12  -2   0   27.90    0.76
 -12  -2   0   27.90    0.71
 -12  -2   0   28.47    0.76
  12  -2   0   25.90    1.73
  12  -2   0   29.42    0.74
  12  -2   0   28.12    1.22
  12   2   0   26.37    0.76
 -12   2   0   27.41    1.72
 -12   2   0   27.33    1.21
  12   2   0   26.45    1.47
  12   2   0   27.74    1.42
  12   2   0   28.15    2.10
  12   2   0   27.04    0.73
 -12   2   0   26.63    0.76
 -12   2   0   27.01    0.76
 -12   2   0   27.67    0.75
  12   2   0   24.53    2.23
 -12   2   0   26.97    0.72
 -14  -2   0   35.78    0.97
  14  -2   0   36.00    1.51
  14  -2   0   36.74    0.94
  14  -2   0   36.48    2.17
 -14  -2   0   36.08    0.97
 -14   2   0   33.96    0.97
  14   2   0   35.25    0.94
  14   2   0   36.41    1.85
 -14   2   0   37.33    1.52
  14   2   0   34.84    1.77
 -14   2   0   34.78    0.96
  14   2   0   34.47    0.97
 -14   2   0   34.89    0.93
  14   2   0   34.67    2.64
 -14   2   0   33.08    2.14
  14   2   0   34.25    2.81
 -14   2   0   34.83    0.97
 -16  -2   0    0.71    0.11
 -16  -2   0    0.67    0.11
  16  -2   0    0.93    0.10
  16  -2   0    1.45    1.51
  16  -2   0    0.62    0.64
 -16   2   0    0.88    0.12
 -16   2   0    1.01    0.14
  16   2   0    0.73    0.12
  16   2   0    0.85    0.10
 -16   2   0    0.98    0.13
 -16   2   0    1.26    0.17
 -18  -2   0   30.82    0.89
 -18  -2   0   31.01    0.88
  18   2   0   30.41    0.89
 -18   2   0   30.44    0.89
 -18   2   0   30.49    0.88
 -18   2   0   30.49    0.89
 -18   2   0   30.96    0.84
 -20  -2   0    7.48    0.44
 -20  -2   0    8.45    0.39
 -20  -2   0    8.24    0.39
  20   2   0    9.04    0.39
 -20   2   0    8.84    0.39
 -20   2   0    8.56    0.32
 -20   2   0    8.67    0.38
 -20   2   0    8.67    0.39
 -22  -2   0   11.06    0.48
 -22  -2   0   11.00    0.45
 -22  -2   0   11.46    0.48
 -22   2   0   11.49    0.46
 -22   2   0   10.74    0.47
 -22   2   0   11.08    0.48
  22   2   0   10.71    0.47
 -24  -2   0    0.73    0.19
 -24  -2   0    0.54    0.17
 -24  -2   0    0.54    0.20
 -24  -2   0    0.60    0.19
  24   2   0    0.34    0.21
 -24   2   0    0.55    0.18
 -24   2   0    0.71    0.18
 -24   2   0    0.16    0.18
 -24   2   0    0.44    0.18
  -1  -3   0  871.56   22.60
  -1  -3   0  846.18   22.12
   1  -3   0  878.01   22.53
   1  -3   0  847.55   22.07
  -1   3   0  852.26   22.08
   1   3   0  892.18   22.62
   1   3   0  850.96   22.11
  -1   3   0  851.37   22.51
   3  -3   0   19.48    0.52
  -3  -3   0   19.99    0.52
   3  -3   0   19.54    0.49
   3  -3   0   19.54    0.50
  -3  -3   0   18.92    1.02
  -3  -3   0   20.06    0.52
  -3  -3   0   19.03    1.49
   3  -3   0   19.36    0.53
  -3  -3   0   19.91    0.52
   3  -3   0   19.61    0.53
   3  -3   0   20.03    0.51
  -3   3   0   18.88    0.52
   3   3   0   19.17    0.53
   3   3   0   19.62    0.52
  -3   3   0   19.93    0.53
   3   3   0   19.27    1.39
   3   3   0   18.68    0.52
   3   3   0   19.57    0.99
   3   3   0   19.53    0.52
   3   3   0   19.26    0.52
  -3   3   0   19.44    0.51
  -3   3   0   19.30    0.53
  -5  -3   0   87.64    2.28
   5  -3   0   88.10    2.27
  -5  -3   0   89.14    2.27
   5  -3   0   90.94    2.26
   5  -3   0   88.19    2.69
  -5  -3   0   91.78    2.88
   5  -3   0   85.89    2.28
  -5  -3   0   94.45    3.45
  -5  -3   0   84.77    2.27
   5  -3   0   92.84    3.11
   5   3   0   87.79    2.84
  -5   3   0   89.52    2.26
   5   3   0   89.82    2.28
   5   3   0   88.28    3.35
  -5   3   0   87.76    2.28
   5   3   0   90.44    2.26
   5   3   0   89.09    2.27
   5   3   0   88.39    2.28
   5   3   0   89.03    2.28
  -5   3   0   94.77    3.14
  -5   3   0   87.32    2.28
  -5   3   0   93.65    2.72
  -5   3   0   87.50    2.28
   7  -3   0   46.58    1.21
   7  -3   0   45.77    2.02
  -7  -3   0   47.42    1.86
   7  -3   0   43.42    1.61
  -7  -3   0   46.35    2.47
  -7  -3   0   47.52    1.23
   7  -3   0   47.60    1.23
  -7  -3   0   49.27    1.20
  -7  -3   0   47.12    1.22
  -7  -3   0   46.44    1.21
   7   3   0   44.07    1.82
  -7   3   0   48.86    1.21
  -7   3   0   46.43    1.19
  -7   3   0   47.44    1.65
   7   3   0   47.71    1.23
  -7   3   0   48.29    1.23
   7   3   0   46.54    1.22
   7   3   0   48.19    1.23
   7   3   0   47.73    1.22
  -7   3   0   45.34    1.18
  -7   3   0   45.92    2.06
   7   3   0   49.55    1.19
  -7   3   0   48.13    1.22
   7   3   0   44.34    2.36
  -7   3   0   46.85    1.23
  -9  -3   0    0.90    0.05
   9  -3   0    0.72    0.09
   9  -3   0    1.36    0.68
   9  -3   0    0.50    0.32
  -9  -3   0    1.02    0.08
  -9  -3   0    0.87    0.12
  -9   3   0    0.85    0.04
  -9   3   0    0.66    0.09
   9   3   0    0.81    0.03
  -9   3   0    0.95    0.63
  -9   3   0    0.44    0.32
  -9   3   0    0.68    0.10
  -9   3   0    0.85    0.05
  -9   3   0    0.88    0.09
  -9   3   0    0.61    0.08
   9   3   0    0.60    0.09
   9   3   0    0.64    0.94
   9   3   0    1.50    0.52
   9   3   0    0.82    0.09
   9   3   0    0.70    0.09
 -11  -3   0    9.00    0.33
 -11  -3   0    9.26    0.32
  11  -3   0    9.23    1.38
 -11  -3   0    9.62    0.28
  11  -3   0    9.71    0.82
 -11   3   0   10.36    0.81
 -11   3   0    9.87    0.32
  11   3   0    9.73    0.30
 -11   3   0   10.14    0.30
  11   3   0    9.85    0.32
  11   3   0    9.54    1.10
 -11   3   0   10.18    0.27
  11   3   0    9.83    0.32
 -11   3   0    9.40    0.33
  11   3   0    9.20    1.09
  11   3   0    8.60    1.53
 -11   3   0   10.26    0.26
 -11   3   0    9.68    0.33
  11   3   0    8.97    1.47
 -11   3   0   10.93    1.39
  13  -3   0   17.70    1.12
 -13  -3   0   18.99    0.52
 -13  -3   0   19.45    0.57
 -13  -3   0   19.09    0.57
  13  -3   0   19.95    0.56
  13  -3   0   18.26    1.81
  13   3   0   21.01    1.57
  13   3   0   17.40    2.72
 -13   3   0   19.38    0.57
 -13   3   0   19.55    0.57
  13   3   0   20.35    2.68
  13   3   0   15.25    1.94
 -13   3   0   20.10    0.56
  13   3   0   19.41    0.57
 -13   3   0   20.15    1.12
 -13   3   0   19.73    0.52
  13   3   0   19.21    0.54
 -13   3   0   20.53    1.79
 -13   3   0   18.98    0.58
  15  -3   0    1.84    0.17
  15  -3   0    2.39    1.63
 -15  -3   0    1.94    0.20
  15  -3   0    1.01    0.81
 -15  -3   0    1.94    0.20
  15   3   0    2.23    0.20
  15   3   0    2.27    0.16
 -15   3   0    2.29    0.20
 -15   3   0    2.30    0.19
 -15   3   0    2.39    0.18
 -15   3   0    2.30    0.11
 -15   3   0    2.31    0.20
 -17  -3   0    2.18    0.22
 -17  -3   0    2.41    0.22
  17  -3   0    2.72    0.19
 -17   3   0    2.37    0.22
 -17   3   0    1.98    0.23
 -17   3   0    2.58    0.19
  17   3   0    2.31    0.23
 -17   3   0    2.08    0.21
  17   3   0    2.21    0.19
 -17   3   0    2.33    0.20
 -19  -3   0   22.35    0.72
 -19  -3   0   22.65    0.72
 -19   3   0   23.36    0.73
 -19   3   0   23.80    0.73
 -19   3   0   23.91    0.71
 -19   3   0   24.19    0.71
  19   3   0   23.42    0.73
 -21  -3   0   30.36    0.92
 -21  -3   0   31.52    0.93
 -21  -3   0   29.83    0.93
 -21   3   0   30.91    0.90
 -21   3   0   30.18    0.92
 -21   3   0   30.42    0.90
 -21   3   0   29.91    0.93
  21   3   0   30.84    0.92
 -23  -3   0    1.00    0.21
 -23  -3   0    1.08    0.20
 -23  -3   0    0.95    0.19
 -23  -3   0    0.80    0.21
 -23   3   0    0.57    0.17
 -23   3   0    1.05    0.19
  23   3   0    0.67    0.20
 -23   3   0    0.79    0.21
 -23   3   0    0.88    0.21
   0  -4   0   43.77    1.72
   0  -4   0   40.60    1.03
   0  -4   0   42.65    2.33
   0  -4   0   40.36    1.06
   0  -4   0   38.99    1.05
   0  -4   0   41.98    1.03
   0  -4   0   40.40    1.03
   0   4   0   40.05    1.05
   0   4   0   41.03    2.15
   0   4   0   39.96    1.62
   0   4   0   38.73    1.05
   0   4   0   38.35    1.05
   0   4   0   38.77    1.04
   0   4   0   38.33    1.05
   2  -4   0   43.65    1.71
   2  -4   0   42.60    1.12
  -2  -4   0   41.88    1.12
   2  -4   0   42.57    1.09
  -2  -4   0   43.61    1.12
   2  -4   0   39.62    2.22
   2  -4   0   42.53    1.11
   2  -4   0   41.97    1.09
  -2  -4   0   42.29    1.10
  -2  -4   0   43.30    1.80
   2  -4   0   43.84    1.09
  -2  -4   0   42.65    2.43
   2   4   0   41.55    1.72
   2   4   0   42.60    1.11
  -2   4   0   43.41    1.12
   2   4   0   43.29    2.30
   2   4   0   42.02    1.11
  -2   4   0   44.97    1.68
   2   4   0   42.43    1.12
  -2   4   0   43.65    1.11
   2   4   0   41.71    1.11
  -2   4   0   42.73    1.12
   2   4   0   41.52    1.12
  -2   4   0   43.86    1.12
  -2   4   0   42.07    1.11
  -2   4   0   46.14    2.20
  -4  -4   0   10.88    0.32
   4  -4   0   10.50    0.34
  -4  -4   0   10.96    0.32
  -4  -4   0   10.48    0.32
   4  -4   0   10.58    0.32
   4  -4   0   11.04    0.30
  -4  -4   0   10.56    1.02
  -4  -4   0   11.31    1.81
   4  -4   0   10.86    0.29
   4   4   0   11.19    0.33
   4   4   0   11.22    0.33
   4   4   0   11.20    0.32
  -4   4   0   11.14    0.33
  -4   4   0   10.58    0.32
   4   4   0   11.16    0.32
  -4   4   0   10.76    0.83
  -4   4   0   10.64    0.33
   4   4   0    8.82    1.45
   4   4   0   11.30    0.33
  -4   4   0   11.56    0.30
  -4   4   0   11.44    1.36
  -4   4   0   10.99    0.33
   4   4   0   12.05    0.96
   6  -4   0   61.26    2.77
   6  -4   0   67.95    1.79
  -6  -4   0   70.29    1.76
  -6  -4   0   63.26    3.20
  -6  -4   0   70.46    1.75
   6  -4   0   64.23    2.30
  -6  -4   0   68.92    1.76
  -6  -4   0   69.65    1.76
  -6  -4   0   65.52    2.51
   6  -4   0   68.37    1.75
   6   4   0   70.57    1.77
  -6   4   0   69.57    1.77
  -6   4   0   69.20    1.74
  -6   4   0   76.72    2.39
  -6   4   0   66.55    1.77
   6   4   0   68.57    1.77
   6   4   0   69.34    1.76
  -6   4   0   62.26    1.77
  -6   4   0   70.24    2.90
   6   4   0   71.39    3.28
   6   4   0   68.52    2.53
  -8  -4   0  215.19    5.66
   8  -4   0  226.19    5.68
  -8  -4   0  230.60    7.58
  -8  -4   0  218.43    5.67
   8  -4   0  234.98    6.30
  -8  -4   0  232.98    6.65
   8  -4   0  232.03    6.91
  -8   4   0  214.49    5.67
  -8   4   0  218.03    5.67
   8   4   0  217.51    5.66
   8   4   0  222.63    5.67
   8   4   0  229.37    6.58
  -8   4   0  226.93    6.86
   8   4   0  218.80    5.67
  -8   4   0  221.78    5.68
   8   4   0  219.18    7.35
  -8   4   0  239.55    6.30
   8   4   0  215.82    5.67
  -8   4   0  223.69    5.65
 -10  -4   0    0.20    0.09
  10  -4   0    0.24    0.08
  10  -4   0    0.42    0.90
  10  -4   0    0.22    0.41
 -10  -4   0    0.01    0.07
 -10  -4   0    0.22    0.04
  10   4   0    0.35    0.09
 -10   4   0    0.25    0.05
  10   4   0    0.45    1.35
  10   4   0    0.14    0.08
 -10   4   0    0.05    0.84
  10   4   0    0.14    0.60
  10   4   0    0.16    0.07
 -10   4   0    0.07    0.09
 -10   4   0    0.12    0.08
 -10   4   0    0.05    0.38
 -10   4   0    0.11    0.09
 -12  -4   0  111.94    2.83
 -12  -4   0  109.42    2.86
  12  -4   0  110.84    2.86
  12  -4   0  109.06    3.49
 -12  -4   0  108.66    2.89
  12  -4   0  109.85    4.22
  12   4   0  119.78    4.04
  12   4   0  118.52    5.45
 -12   4   0  107.50    2.86
  12   4   0  114.38    4.06
 -12   4   0  109.60    2.86
 -12   4   0  111.47    3.50
  12   4   0  111.17    2.86
 -12   4   0  109.71    2.84
 -12   4   0  111.02    4.20
  12   4   0  110.98    2.84
  12   4   0  109.29    2.86
 -12   4   0  105.80    2.87
  12   4   0  117.43    5.16
 -14  -4   0   71.52    1.89
 -14  -4   0   74.35    1.84
 -14  -4   0   70.04    1.88
  14  -4   0   71.19    1.87
 -14   4   0   70.35    1.88
  14   4   0   71.70    1.85
 -14   4   0   63.72    4.47
 -14   4   0   72.29    1.88
  14   4   0   72.71    1.88
  14   4   0   71.16    1.88
 -14   4   0   72.23    1.86
 -14   4   0   70.08    1.89
 -14   4   0   72.67    3.39
 -16  -4   0    1.72    0.22
  16  -4   0    2.06    0.21
 -16  -4   0    1.01    0.14
 -16   4   0    1.55    0.20
  16   4   0    1.51    0.21
  16   4   0    1.51    0.18
 -16   4   0    1.35    0.15
 -16   4   0    1.20    0.18
 -16   4   0    1.50    0.22
  18  -4   0   50.81    1.34
 -18  -4   0   48.95    1.39
 -18  -4   0   49.81    1.37
 -18   4   0   51.46    1.35
 -18   4   0   50.26    1.38
 -18   4   0   50.85    1.38
  18   4   0   50.51    1.33
  18   4   0   44.77    1.45
 -18   4   0   49.42    1.38
 -20  -4   0   11.69    0.48
 -20  -4   0   11.52    0.47
 -20   4   0   11.55    0.48
  20   4   0   11.30    0.47
 -20   4   0   11.73    0.47
 -20   4   0   11.24    0.45
 -22  -4   0    1.98    0.23
 -22  -4   0    2.10    0.32
 -22  -4   0    1.98    0.24
  22   4   0    1.91    0.24
 -22   4   0    1.82    0.21
 -22   4   0    2.53    0.32
 -22   4   0    1.59    0.19
 -22   4   0    1.82    0.24
  -1  -5   0   38.82    1.06
   1  -5   0   39.15    1.02
   1  -5   0   39.04    1.05
  -1  -5   0   39.18    1.04
   1  -5   0   37.57    1.06
  -1  -5   0   39.28    2.75
  -1  -5   0   39.00    1.03
  -1  -5   0   39.19    1.06
   1  -5   0   39.85    1.88
   1  -5   0   39.67    1.02
  -1  -5   0   37.25    1.89
   1  -5   0   39.24    1.03
   1  -5   0   37.91    2.71
  -1   5   0   42.10    1.81
  -1   5   0   41.08    1.05
  -1   5   0   40.33    1.06
   1   5   0   39.01    1.79
   1   5   0   41.02    1.05
  -1   5   0   38.31    2.40
   1   5   0   40.20    1.05
   1   5   0   41.17    1.06
  -1   5   0   40.51    1.06
   1   5   0   39.91    2.55
   1   5   0   41.00    1.06
  -1   5   0   40.96    1.06
  -1   5   0   40.88    1.06
   1   5   0   40.95    1.05
   3  -5   0    4.84    0.14
  -3  -5   0    6.23    1.14
  -3  -5   0    4.68    0.17
  -3  -5   0    4.54    0.17
   3  -5   0    4.82    0.15
   3  -5   0    4.59    1.29
   3  -5   0    4.79    0.19
  -3  -5   0    5.41    1.55
   3  -5   0    4.76    0.13
  -3  -5   0    4.60    0.19
   3  -5   0    4.92    0.21
  -3  -5   0    4.87    0.19
   3  -5   0    4.88    0.15
   3  -5   0    5.17    0.78
  -3   5   0    4.66    0.20
  -3   5   0    4.73    0.18
  -3   5   0    5.06    0.72
  -3   5   0    4.60    0.21
  -3   5   0    4.69    0.19
   3   5   0    4.73    0.20
   3   5   0    4.57    0.20
   3   5   0    4.60    0.18
  -3   5   0    4.47    0.20
   3   5   0    4.55    0.18
   3   5   0    4.65    0.19
   3   5   0    5.45    1.28
  -3   5   0    4.86    1.06
   3   5   0    3.23    0.62
  -5  -5   0   40.64    1.05
   5  -5   0   40.67    1.00
   5  -5   0   39.69    1.07
   5  -5   0   40.41    1.05
  -5  -5   0   41.31    2.07
   5  -5   0   41.33    2.44
   5  -5   0   42.22    1.02
   5  -5   0   40.30    1.00
  -5  -5   0   39.27    1.06
  -5  -5   0   38.83    2.99
  -5   5   0   36.80    2.40
   5   5   0   39.71    1.05
   5   5   0   39.52    1.05
   5   5   0   37.92    1.06
  -5   5   0   39.13    1.07
  -5   5   0   39.57    1.77
   5   5   0   41.83    2.82
  -5   5   0   40.00    1.02
  -5   5   0   37.45    1.06
   5   5   0   39.75    1.06
   5   5   0   38.82    1.05
   5   5   0   40.10    1.92
  -5   5   0   38.86    1.06
  -5   5   0   38.58    1.06
   7  -5   0   32.61    0.86
  -7  -5   0   33.06    0.85
   7  -5   0   33.15    0.88
  -7  -5   0   34.40    3.02
   7  -5   0   29.65    2.27
  -7  -5   0   32.53    0.87
  -7  -5   0   31.78    0.86
   7  -5   0   32.28    1.58
  -7  -5   0   33.85    1.94
   7   5   0   31.51    0.87
   7   5   0   31.24    0.87
  -7   5   0   30.31    0.87
  -7   5   0   32.25    0.83
  -7   5   0   31.76    0.87
  -7   5   0   31.22    0.87
  -7   5   0   31.40    2.29
   7   5   0   30.50    0.87
  -7   5   0   31.20    0.88
   7   5   0   32.16    0.86
  -7   5   0   31.75    1.58
   7   5   0   31.91    2.75
   7   5   0   31.22    1.82
  -9  -5   0   20.75    0.59
  -9  -5   0   22.92    3.07
  -9  -5   0   22.31    1.73
  -9  -5   0   21.39    0.57
   9  -5   0   17.60    2.22
   9  -5   0   20.09    1.37
  -9  -5   0   21.01    0.60
   9  -5   0   19.88    0.61
  -9  -5   0   21.22    0.61
   9   5   0   20.78    0.61
  -9   5   0   20.61    0.56
   9   5   0   25.37    2.93
  -9   5   0   20.21    1.37
   9   5   0   21.24    0.59
  -9   5   0   18.90    2.23
   9   5   0   21.87    1.72
   9   5   0   20.33    0.60
  -9   5   0   21.05    0.60
  -9   5   0   21.04    0.62
  -9   5   0   20.91    0.61
   9   5   0   20.96    0.61
  -9   5   0   20.41    0.60
 -11  -5   0   16.81    0.51
 -11  -5   0   17.58    0.53
 -11  -5   0   17.10    0.50
 -11  -5   0   17.36    0.46
  11  -5   0   16.75    0.53
 -11   5   0   15.18    1.30
  11   5   0   17.49    0.52
  11   5   0   20.92    3.32
 -11   5   0   12.78    1.78
 -11   5   0   17.05    0.47
 -11   5   0   16.67    0.53
 -11   5   0   16.45    0.52
  11   5   0   16.58    0.52
  11   5   0   17.15    0.50
  11   5   0   17.78    1.78
 -11   5   0   16.18    0.52
 -13  -5   0   65.44    1.73
  13  -5   0   67.23    1.73
 -13  -5   0   67.68    1.70
 -13  -5   0   65.09    1.72
  13   5   0   63.40    1.70
 -13   5   0   65.41    1.69
  13   5   0   64.61    1.72
 -13   5   0   63.87    1.72
 -13   5   0   63.29    1.73
 -13   5   0   64.00    1.74
  13   5   0   64.90    1.73
  15  -5   0    9.42    0.37
 -15  -5   0    9.57    0.38
 -15  -5   0    9.58    0.38
  15   5   0    9.23    0.34
 -15   5   0    9.07    0.38
 -15   5   0    8.78    0.37
  15   5   0    9.04    0.38
  15   5   0    9.36    0.37
 -15   5   0    8.95    0.33
 -15   5   0    8.67    0.38
 -17  -5   0    5.59    0.34
  17  -5   0    5.82    0.33
 -17  -5   0    6.01    0.33
 -17   5   0    5.84    0.30
 -17   5   0    5.42    0.33
  17   5   0    5.58    0.29
 -17   5   0    5.62    0.36
  17   5   0    5.95    0.32
 -17   5   0    5.53    0.34
 -19  -5   0    5.07    0.33
 -19  -5   0    4.99    0.33
 -19  -5   0    4.68    0.34
  19   5   0    4.53    0.33
 -19   5   0    4.48    0.34
 -19   5   0    4.23    0.34
 -19   5   0    4.22    0.32
 -21  -5   0    4.00    0.37
 -21  -5   0    3.68    0.36
 -21  -5   0    4.04    0.35
 -21   5   0    3.97    0.40
  21   5   0    4.26    0.35
 -21   5   0    4.88    0.37
 -21   5   0    3.91    0.38
   0  -6   0    9.72    0.32
   0  -6   0    9.41    0.28
   0  -6   0    9.45    0.27
   0  -6   0    9.25    2.16
   0  -6   0    9.46    0.33
   0  -6   0    9.14    1.49
   0   6   0    9.05    0.30
   0   6   0    9.06    0.31
   0   6   0    8.31    0.32
   0   6   0    9.06    0.32
   0   6   0    8.93    0.32
   0   6   0   11.00    1.24
   0   6   0    7.44    1.57
  -2  -6   0    4.37    0.22
   2  -6   0    4.59    0.15
   2  -6   0    4.63    0.16
   2  -6   0    4.20    0.23
   2  -6   0    4.49    0.21
   2  -6   0    3.10    0.79
  -2  -6   0    4.35    0.22
   2  -6   0    5.03    1.78
  -2  -6   0    4.51    0.21
  -2  -6   0    3.92    1.07
  -2  -6   0    4.27    2.11
  -2  -6   0    4.58    0.17
   2   6   0    4.29    1.61
   2   6   0    5.06    0.92
  -2   6   0    4.96    0.21
  -2   6   0    3.92    1.32
   2   6   0    4.69    0.21
  -2   6   0    4.90    0.22
  -2   6   0    4.77    0.21
  -2   6   0    4.84    0.22
   2   6   0    4.97    0.22
   2   6   0    4.65    0.22
  -2   6   0    4.72    0.22
   2   6   0    4.94    0.21
  -2   6   0    5.07    1.00
   2   6   0    5.08    0.23
  -4  -6   0    7.03    0.27
   4  -6   0    4.90    1.80
   4  -6   0    7.02    0.20
  -4  -6   0    7.25    0.25
   4  -6   0    6.87    0.29
   4  -6   0    6.51    1.00
  -4  -6   0    6.87    0.25
  -4  -6   0    7.18    0.27
  -4  -6   0    5.07    2.21
  -4  -6   0    7.08    1.23
  -4  -6   0    7.08    0.23
   4  -6   0    7.19    0.27
   4   6   0    6.16    0.27
   4   6   0    6.85    0.26
  -4   6   0    6.53    0.28
   4   6   0    9.03    1.89
  -4   6   0    7.27    0.28
   4   6   0    6.82    0.26
   4   6   0    6.79    0.26
  -4   6   0    8.88    1.59
   4   6   0    6.91    0.28
   4   6   0    7.29    1.25
  -4   6   0    6.61    0.27
  -4   6   0    8.43    1.04
  -4   6   0    6.74    0.26
   6  -6   0    3.89    0.23
   6  -6   0    2.87    1.37
  -6  -6   0    4.63    0.20
   6  -6   0    3.56    0.75
  -6  -6   0    4.23    0.21
   6  -6   0    4.23    0.21
  -6  -6   0    4.19    0.20
  -6  -6   0    4.09    0.21
  -6  -6   0    8.14    2.32
  -6  -6   0    5.83    1.22
  -6  -6   0    4.12    0.21
  -6   6   0    3.24    0.71
  -6   6   0    4.00    0.21
   6   6   0    3.51    0.21
   6   6   0    4.40    0.94
  -6   6   0    3.55    0.21
   6   6   0    3.94    0.22
  -6   6   0    3.84    0.21
  -6   6   0    3.79    1.39
   6   6   0    3.63    0.20
   6   6   0    3.56    0.21
  -6   6   0    4.00    0.22
   6   6   0    4.54    1.85
  -6   6   0    3.60    0.23
   8  -6   0   14.15    0.43
  -8  -6   0   10.76    1.86
  -8  -6   0   14.00    0.43
  -8  -6   0   14.04    0.42
  -8  -6   0    7.41    2.59
  -8  -6   0   13.90    0.44
   8  -6   0   14.16    0.46
  -8  -6   0   13.97    0.44
   8   6   0   13.51    0.45
  -8   6   0   13.99    0.45
  -8   6   0   13.61    0.45
   8   6   0   15.24    1.86
   8   6   0   13.56    0.43
   8   6   0   17.11    2.87
  -8   6   0   14.03    0.38
  -8   6   0   13.80    0.46
   8   6   0   13.90    0.46
   8   6   0   13.62    0.44
  -8   6   0   13.85    0.45
 -10  -6   0   11.86    3.06
 -10  -6   0   11.00    1.66
 -10  -6   0    9.60    0.34
 -10  -6   0   10.00    0.36
 -10  -6   0   10.00    0.35
  10  -6   0   10.29    0.38
 -10  -6   0   10.04    0.35
  10   6   0   10.78    1.95
  10   6   0    9.52    0.36
  10   6   0   14.31    2.96
 -10   6   0    9.80    0.38
 -10   6   0    9.38    0.37
  10   6   0    9.56    0.37
  10   6   0    9.32    0.37
 -10   6   0    9.06    0.36
 -10   6   0    9.50    0.36
 -10   6   0   10.06    0.29
  10   6   0    9.99    0.35
  12  -6   0    5.39    0.29
 -12  -6   0    5.00    0.25
 -12  -6   0    5.13    0.29
 -12  -6   0    5.10    0.26
 -12   6   0    5.05    0.28
 -12   6   0    5.39    0.27
 -12   6   0    4.75    0.28
  12   6   0    5.12    0.27
  12   6   0    5.10    0.26
  12   6   0    5.04    0.28
  14  -6   0   15.14    0.52
 -14  -6   0   13.58    0.58
 -14  -6   0   14.50    0.51
 -14   6   0   15.50    0.50
 -14   6   0   15.16    0.50
 -14   6   0   14.81    0.53
  14   6   0   15.11    0.53
  14   6   0   15.04    0.51
  14   6   0   14.93    0.49
 -16  -6   0    4.32    0.32
 -16  -6   0    4.41    0.31
 -16  -6   0    4.28    0.30
  16   6   0    4.66    0.29
 -16   6   0    4.08    0.28
 -16   6   0    3.78    0.30
 -16   6   0    4.97    0.29
 -16   6   0    3.81    0.32
  16   6   0    3.68    0.32
  16   6   0    3.97    0.29
 -18  -6   0    7.44    0.40
 -18  -6   0    7.84    0.41
  18  -6   0    7.82    0.41
 -18  -6   0    7.71    0.41
 -18   6   0    8.10    0.38
 -18   6   0    7.89    0.40
 -18   6   0    7.56    0.37
 -18   6   0    7.76    0.42
  18   6   0    8.16    0.40
 -20  -6   0    2.19    0.25
 -20  -6   0    2.60    0.34
 -20  -6   0    2.43    0.34
 -20   6   0    2.60    0.30
 -20   6   0    2.68    0.34
 -20   6   0    2.49    0.33
  20   6   0    1.75    0.22
 -20   6   0    2.44    0.31
  -1  -7   0    4.20    0.24
   1  -7   0    4.24    0.24
  -1  -7   0    4.58    0.18
   1  -7   0    4.65    0.18
  -1  -7   0    4.50    0.20
  -1  -7   0    4.33    0.25
   1  -7   0    4.44    0.26
   1   7   0    5.11    0.24
   1   7   0    5.00    0.24
   1   7   0    5.13    0.25
   1   7   0    5.15    0.26
  -1   7   0    5.36    0.25
  -1   7   0    4.89    0.25
  -1   7   0    4.61    0.24
  -1   7   0    4.95    0.25
   1   7   0    5.45    0.23
  -1   7   0    4.96    0.23
   3  -7   0    6.33    0.30
   3  -7   0    6.56    0.28
  -3  -7   0    6.61    0.28
  -3  -7   0    6.84    0.25
  -3  -7   0    6.79    0.21
  -3  -7   0    6.38    0.26
  -3  -7   0    6.51    0.28
  -3   7   0    6.55    0.29
   3   7   0    4.02    2.14
   3   7   0    6.60    0.27
  -3   7   0    6.56    0.29
   3   7   0    6.30    0.29
  -3   7   0    6.17    0.29
  -3   7   0    6.44    0.27
  -3   7   0    6.39    0.28
   3   7   0    6.83    0.27
   3   7   0    6.31    0.28
   3   7   0    7.04    1.21
   3   7   0    6.37    0.29
  -5  -7   0   10.70    0.36
  -5  -7   0   10.61    0.34
  -5  -7   0   10.37    0.38
  -5  -7   0   10.47    0.37
   5  -7   0   10.13    0.40
   5  -7   0   10.42    0.38
  -5  -7   0   10.65    0.36
   5   7   0   10.83    0.37
   5   7   0   10.44    0.38
   5   7   0    8.98    1.77
  -5   7   0   10.46    0.37
  -5   7   0   10.09    0.38
   5   7   0   10.55    0.38
  -5   7   0   10.67    0.39
   5   7   0   10.72    0.37
  -5   7   0   10.58    0.38
   5   7   0   10.65    0.37
   5   7   0    8.50    2.54
  -5   7   0   10.66    0.39
  -7  -7   0   65.89    1.76
   7  -7   0   65.92    1.78
  -7  -7   0   67.93    1.83
  -7  -7   0   67.10    1.74
  -7  -7   0   67.05    1.75
  -7  -7   0   67.23    1.73
   7  -7   0   66.45    1.75
   7   7   0   64.05    5.74
  -7   7   0   65.61    1.76
   7   7   0   67.78    1.77
  -7   7   0   66.91    1.75
  -7   7   0   67.90    1.76
  -7   7   0   64.44    1.77
  -7   7   0   65.73    1.77
   7   7   0   65.54    1.75
   7   7   0   65.20    1.75
   7   7   0   66.08    1.76
   9  -7   0   19.03    0.62
  -9  -7   0   18.94    0.59
  -9  -7   0   19.78    0.57
  -9  -7   0   18.94    0.59
  -9  -7   0   19.75    0.59
  -9  -7   0   19.54    0.57
  -9   7   0   18.27    0.59
  -9   7   0   18.91    0.62
   9   7   0   19.26    0.58
   9   7   0   18.90    0.59
   9   7   0   18.66    0.60
  -9   7   0   18.95    0.59
  -9   7   0   19.15    0.61
   9   7   0   19.25    0.60
  -9   7   0   18.00    0.60
  11  -7   0   21.70    0.71
 -11  -7   0   22.40    0.69
 -11  -7   0   22.58    0.69
 -11  -7   0   22.27    0.67
 -11  -7   0   22.69    0.67
  11   7   0   23.57    0.69
  11   7   0   22.29    0.69
 -11   7   0   22.58    0.71
 -11   7   0   22.36    0.71
  11   7   0   22.64    0.67
 -11   7   0   22.00    0.74
  11   7   0   20.89    0.76
  13  -7   0   45.75    1.27
 -13  -7   0   44.77    1.22
 -13  -7   0   45.41    1.24
 -13  -7   0   44.93    1.25
 -13  -7   0   44.72    1.25
 -13   7   0   44.69    1.24
  13   7   0   44.54    1.25
  13   7   0   44.19    1.23
 -13   7   0   43.45    1.25
 -13   7   0   43.93    1.25
 -13   7   0   45.71    1.28
  15  -7   0   11.30    0.49
 -15  -7   0   11.71    0.46
 -15  -7   0   12.48    0.48
 -15  -7   0   11.56    0.48
 -15   7   0   11.69    0.45
  15   7   0   11.77    0.48
  15   7   0    9.67    0.54
 -15   7   0   11.36    0.47
 -15   7   0   11.15    0.47
  15   7   0   11.27    0.47
 -15   7   0   11.80    0.50
 -17  -7   0    4.61    0.37
 -17  -7   0    4.42    0.36
 -17  -7   0    4.59    0.36
  17  -7   0    4.45    0.38
 -17   7   0    4.23    0.40
 -17   7   0    4.58    0.35
  17   7   0    4.63    0.35
 -17   7   0    4.47    0.36
 -17   7   0    4.29    0.33
  17   7   0    4.39    0.37
 -19  -7   0    7.48    0.44
 -19  -7   0    7.89    0.52
 -19  -7   0    7.41    0.52
  19  -7   0    7.97    0.61
 -19   7   0    9.31    0.56
 -19   7   0    7.21    0.40
 -19   7   0    8.42    0.42
  19   7   0    8.52    0.43
 -19   7   0    8.43    0.59
   0  -8   0   11.86    0.43
   0  -8   0   12.37    0.44
   0   8   0   11.25    0.42
   0   8   0   11.36    0.43
   0   8   0   11.47    0.43
   0   8   0   11.20    0.42
   0   8   0   11.44    0.40
   2  -8   0    0.90    0.14
   2  -8   0    0.95    0.16
  -2  -8   0    1.02    0.14
  -2  -8   0    1.06    0.12
  -2  -8   0    0.80    0.14
   2   8   0    0.95    0.14
  -2   8   0    1.13    0.16
  -2   8   0    1.01    0.13
   2   8   0    0.90    0.13
   2   8   0    1.02    0.15
   2   8   0    0.87    0.14
   2   8   0    1.04    0.15
  -2   8   0    0.76    0.14
  -2   8   0    0.60    0.13
  -2   8   0    0.80    0.14
   4  -8   0   15.88    0.55
  -4  -8   0   15.82    0.50
  -4  -8   0   16.05    0.52
  -4  -8   0   15.84    0.52
  -4  -8   0   15.60    0.49
   4  -8   0   15.89    0.53
  -4   8   0   15.38    0.53
  -4   8   0   15.65    0.53
  -4   8   0   15.65    0.51
   4   8   0   15.96    0.51
   4   8   0   15.71    0.52
   4   8   0   15.62    0.53
  -4   8   0   15.66    0.54
  -4   8   0   15.69    0.52
   4   8   0   16.08    0.53
   4   8   0   16.01    0.52
  -6  -8   0   26.52    0.76
  -6  -8   0   23.68    0.83
  -6  -8   0   27.29    0.77
  -6  -8   0   26.22    0.77
   6   8   0   26.14    0.77
   6   8   0   26.69    0.79
  -6   8   0   25.65    0.79
   6   8   0   26.95    0.77
  -6   8   0   25.43    0.78
  -6   8   0   26.47    0.76
   8  -8   0    5.09    0.32
  -8  -8   0    5.39    0.30
  -8  -8   0    4.76    0.31
  -8  -8   0    5.14    0.27
  -8  -8   0    5.13    0.29
   8   8   0    5.04    0.30
  -8   8   0    4.37    0.29
   8   8   0    4.61    0.28
   8   8   0    4.48    0.40
  -8   8   0    4.86    0.28
  -8   8   0    4.75    0.30
  -8   8   0    4.78    0.31
   8   8   0    4.77    0.29
 -10  -8   0    4.48    0.28
  10  -8   0    4.08    0.33
 -10  -8   0    3.99    0.30
 -10  -8   0    4.77    0.39
 -10   8   0    3.88    0.29
 -10   8   0    4.12    0.30
 -10   8   0    4.45    0.33
 -10   8   0    4.23    0.31
  10   8   0    4.42    0.49
 -10   8   0    4.87    0.30
  10   8   0    4.79    0.31
  10   8   0    4.01    0.32
 -12  -8   0   13.04    0.50
 -12  -8   0   12.91    0.50
  12  -8   0   13.22    0.53
  12   8   0   13.24    0.49
  12   8   0   12.85    0.49
  12   8   0   13.13    0.49
 -12   8   0   12.76    0.53
 -12   8   0   12.16    0.49
 -12   8   0   12.59    0.49
  12   8   0   12.83    0.51
 -12   8   0   12.96    0.50
 -12   8   0   12.99    0.49
 -14  -8   0    5.19    0.37
  14  -8   0    4.83    0.39
 -14  -8   0    4.95    0.37
 -14   8   0    4.59    0.35
  14   8   0    4.24    0.34
 -14   8   0    5.01    0.34
  14   8   0    4.75    0.34
 -14   8   0    4.87    0.41
 -14   8   0    4.80    0.40
  14   8   0    4.85    0.36
  16  -8   0    3.03    0.39
 -16  -8   0    2.75    0.36
 -16  -8   0    3.07    0.37
 -16   8   0    3.41    0.34
 -16   8   0    2.68    0.36
 -16   8   0    3.23    0.33
 -16   8   0    3.25    0.40
  16   8   0    2.96    0.36
  16   8   0    3.02    0.33
  -1  -9   0    9.42    0.40
   1  -9   0    9.26    0.40
  -1  -9   0    8.95    0.40
   1  -9   0    8.88    0.41
   1   9   0    8.62    0.39
  -1   9   0    8.48    0.36
   1   9   0    8.41    0.39
   1   9   0    8.47    0.39
  -1   9   0    8.51    0.40
  -1   9   0    8.16    0.40
  -1   9   0    8.48    0.39
  -1   9   0    8.53    0.39
   1   9   0    8.66    0.40
   1   9   0    8.45    0.36
  -3  -9   0    1.89    0.25
  -3  -9   0    1.89    0.26
   3  -9   0    1.75    0.27
   3   9   0    1.43    0.18
   3   9   0    1.65    0.18
   3   9   0    2.15    0.27
   3   9   0    1.90    0.26
  -3   9   0    2.42    0.39
  -3   9   0    2.01    0.26
   3   9   0    2.01    0.24
  -3   9   0    1.77    0.20
  -3   9   0    1.63    0.24
  -3   9   0    1.89    0.21
  -5  -9   0    9.03    0.40
   5  -9   0    9.09    0.43
  -5  -9   0    9.88    0.39
  -5  -9   0    8.61    0.44
  -5   9   0    8.79    0.43
   5   9   0    8.98    0.40
  -5   9   0    8.41    0.40
  -5   9   0    8.99    0.43
   5   9   0    9.00    0.41
  -5   9   0    8.46    0.41
  -5   9   0    8.89    0.40
   5   9   0    8.70    0.40
  -7  -9   0    4.06    0.32
   7  -9   0    4.00    0.33
  -7  -9   0    3.37    0.30
   7   9   0    3.60    0.32
  -7   9   0    3.87    0.32
  -7   9   0    3.86    0.33
   7   9   0    3.82    0.32
  -7   9   0    3.82    0.30
   7   9   0    3.68    0.30
   7   9   0    3.45    0.28
  -7   9   0    3.67    0.32
  -7   9   0    3.71    0.29
   9  -9   0    4.72    0.37
  -9  -9   0    4.84    0.33
  -9  -9   0    4.40    0.35
   9   9   0    4.67    0.34
  -9   9   0    5.07    0.33
   9   9   0    5.12    0.35
   9   9   0    4.77    0.32
  -9   9   0    4.25    0.36
  -9   9   0    4.65    0.35
  -9   9   0    4.18    0.30
   9   9   0    4.28    0.35
  -9   9   0    4.81    0.38
 -11  -9   0    4.60    0.38
  11  -9   0    4.91    0.40
 -11  -9   0    5.16    0.37
 -11   9   0    4.97    0.37
 -11   9   0    5.11    0.33
  11   9   0    4.71    0.36
  11   9   0    4.68    0.34
  11   9   0    5.47    0.36
 -11   9   0    4.43    0.36
 -11   9   0    4.65    0.36
 -11   9   0    5.11    0.40
  11   9   0    4.50    0.38
 -13  -9   0    4.84    0.39
  13  -9   0    4.60    0.39
 -13  -9   0    4.06    0.39
 -13   9   0    4.62    0.33
 -13   9   0    4.74    0.37
  13   9   0    4.25    0.38
 -13   9   0    5.31    0.42
  13   9   0    5.28    0.35
  13   9   0    5.14    0.39
 -13   9   0    4.73    0.35
 -13   9   0    4.73    0.40
   0 -10   0    2.35    0.31
   0  10   0    2.40    0.34
   0  10   0    2.39    0.33
   0  10   0    2.42    0.33
   0  10   0    2.44    0.31
   2 -10   0    0.45    0.18
  -2 -10   0    0.57    0.17
   2  10   0    0.72    0.20
  -2  10   0    0.75    0.20
  -2  10   0    0.84    0.22
  -2  10   0    0.64    0.19
   2  10   0    0.62    0.18
   2  10   0    0.54    0.17
   2  10   0    0.69    0.20
  -2  10   0    0.62    0.19
   4 -10   0    1.28    0.21
  -4 -10   0    1.07    0.19
  -4  10   0    1.12    0.19
  -4  10   0    1.17    0.21
   4  10   0    1.69    0.23
  -4  10   0    1.37    0.22
   4  10   0    1.17    0.20
  -4  10   0    1.57    0.24
   4  10   0    1.46    0.21
  -6 -10   0   10.23    0.48
   6 -10   0   10.45    0.52
  -6  10   0   10.84    0.49
  -6  10   0   10.95    0.49
  -6  10   0   10.95    0.49
   6  10   0   10.20    0.47
   6  10   0   10.90    0.51
   6  10   0   11.05    0.49
  -6  10   0   12.07    0.53
   8 -10   0    1.84    0.24
   8  10   0    2.63    0.33
   8  10   0    2.78    0.34
  -8  10   0    1.92    0.23
   8  10   0    2.50    0.33
  -8  10   0    2.02    0.24
  -8  10   0    2.79    0.40
  -8  10   0    2.83    0.31
  10  10   0    0.23    0.19
 -10  10   0    0.44    0.23
 -26   0   1    0.33    0.24
 -24   0   1    8.71    0.38
 -24   0   1    8.15    0.42
  24   0  -1    8.33    0.44
 -24   0   1    7.97    0.44
 -24   0   1    8.57    0.43
 -22   0   1    8.82    0.40
 -22   0   1    8.68    0.41
 -22   0   1    8.93    0.37
 -22   0   1    9.40    0.41
  22   0  -1    9.19    0.42
 -20   0   1    0.08    0.17
  20   0  -1   -0.11    0.12
 -20   0   1    0.04    0.12
 -20   0   1   -0.08    0.12
 -20   0   1    0.03    0.10
 -18   0   1    7.04    0.30
  18   0  -1    6.56    0.30
 -18   0   1    6.66    0.28
 -18   0   1    6.82    0.30
  16   0  -1   23.64    1.30
  16   0  -1   26.06    0.73
 -16   0   1   26.15    0.71
  16   0  -1   24.11    2.02
 -16   0   1   26.11    0.73
  16   0  -1   22.88    2.02
 -16   0   1   25.62    0.73
  16   0  -1   25.99    1.33
  14   0  -1    0.23    0.40
 -14   0   1    0.49    0.09
 -14   0   1    0.63    0.08
 -14   0   1    0.51    0.06
  14   0  -1    0.81    0.84
  14   0  -1    0.62    0.06
  14   0  -1   -0.31    0.70
  14   0  -1    0.46    0.08
 -14   0   1    0.63    0.10
 -14   0   1    0.66    0.04
  14   0  -1    0.33    0.35
 -12   0   1   39.05    1.04
  12   0  -1   38.70    1.45
 -12   0   1   40.80    1.02
  12   0  -1   38.19    1.05
  12   0  -1   39.66    1.45
  12   0  -1   39.46    1.02
 -12   0   1   38.96    1.05
  12   0  -1   39.38    1.88
 -12   0   1   41.84    1.01
  12   0  -1   40.01    1.90
  10   0  -1   10.68    0.62
  10   0  -1   10.62    0.99
 -10   0   1   11.61    0.30
  10   0  -1   10.78    0.67
 -10   0   1   12.54    0.31
 -10   0   1   11.54    0.33
 -10   0   1   11.99    0.30
  10   0  -1   11.38    0.31
  10   0  -1   11.56    0.34
  10   0  -1   10.91    0.92
 -10   0   1   11.39    0.34
   8   0  -1    8.46    0.26
   8   0  -1    8.49    0.23
  -8   0   1    8.75    0.23
   8   0  -1    8.05    0.47
   8   0  -1    7.61    0.70
   8   0  -1    8.63    0.70
   8   0  -1    8.92    0.48
  -8   0   1    9.15    0.23
  -8   0   1    8.63    0.23
  -8   0   1    8.47    0.25
  -8   0   1    8.57    0.25
  -8   0   1    8.56    0.24
   6   0  -1  147.98    4.04
   6   0  -1  150.82    4.04
   6   0  -1  142.09    3.86
   6   0  -1  145.19    3.87
   4   0  -1   31.22    0.82
   4   0  -1   31.21    0.82
   4   0  -1   33.27    0.92
  -4   0   1   31.33    0.82
   4   0  -1   31.46    0.91
  -4   0   1   31.47    0.82
   4   0  -1   32.20    0.82
  -4   0   1   32.79    0.82
  -4   0   1   33.39    0.81
   4   0  -1   33.06    1.01
   4   0  -1   32.28    1.01
   2   0  -1   10.36    0.27
   2   0  -1   10.56    0.31
  -2   0   1   10.64    0.27
  -2   0   1   10.70    0.27
   2   0  -1   10.68    0.27
   2   0  -1   11.10    0.27
  -2   0   1   10.44    0.27
  -2   0   1   11.37    0.28
  -2   0   1   10.33    0.31
  -2   0   1   10.96    0.27
  -2   0   1   10.32    0.35
   2   0  -1   10.15    0.27
   2   0  -1   10.37    0.35
   2   0  -1   11.00    0.27
   0   0  -1   59.32    1.68
   0   0   1   66.88    1.79
   0   0   1   64.76    1.69
   0   0  -1   61.10    1.77
   2   0   1  357.70    9.30
  -2   0  -1  353.15    9.28
  -6   0  -1   12.02    0.92
   6   0   1   11.82    0.32
   6   0   1   11.82    0.63
  -6   0  -1   13.21    0.67
   6   0   1   12.60    0.35
   6   0   1   12.62    0.34
  -6   0  -1   12.29    0.34
  -6   0  -1   13.54    0.32
  -6   0  -1   12.36    0.35
   6   0   1   12.43    0.32
   6   0   1   10.83    0.84
   8   0   1   22.76    0.63
  -8   0  -1   23.45    0.63
  -8   0  -1   23.21    0.62
   8   0   1   23.44    0.60
   8   0   1   22.60    0.60
   8   0   1   22.96    0.62
  -8   0  -1   23.20    0.63
  -8   0  -1   23.35    1.39
   8   0   1   22.72    1.35
  -8   0  -1   24.50    0.60
   8   0   1   23.52    1.02
  -8   0  -1   24.15    1.04
  10   0   1    0.83    0.33
 -10   0  -1    0.40    0.06
 -10   0  -1   -0.18    0.61
  10   0   1    0.07    0.57
 -10   0  -1    0.41    0.34
 -12   0  -1   20.60    0.58
  12   0   1   20.27    1.83
  12   0   1   21.10    0.53
 -12   0  -1   21.76    0.54
  12   0   1   19.32    1.75
  12   0   1   19.93    1.16
 -12   0  -1   21.08    0.59
 -12   0  -1   19.82    0.59
  12   0   1   21.40    1.19
  12   0   1   20.72    0.59
 -14   0  -1    8.74    0.31
  14   0   1    8.72    1.02
  14   0   1    9.60    1.00
  14   0   1    9.19    1.49
  14   0   1    8.15    0.31
 -14   0  -1    8.58    0.30
  14   0   1    8.98    1.49
 -14   0  -1    8.52    0.31
 -16   0  -1    3.03    0.20
 -16   0  -1    3.10    0.21
  16   0   1    3.11    0.22
 -16   0  -1    3.10    0.22
 -18   0  -1   12.48    0.45
 -18   0  -1   12.74    0.45
 -18   0  -1   12.27    0.45
  18   0   1   12.44    0.45
 -18   0  -1   12.27    0.42
 -20   0  -1   44.45    1.19
 -20   0  -1   43.55    1.23
  20   0   1   44.54    1.24
 -20   0  -1   42.48    1.23
 -20   0  -1   43.87    1.23
 -20   0  -1   43.14    1.20
 -22   0  -1   16.94    0.61
 -22   0  -1   16.65    0.61
 -22   0  -1   17.40    0.57
 -22   0  -1   17.01    0.61
 -24   0  -1   10.87    0.48
 -24   0  -1   10.09    0.47
 -24   0  -1   10.21    0.49
 -24   0  -1    9.92    0.44
 -25  -1   1    1.26    0.22
 -25  -1   1    1.46    0.18
 -25  -1   1    1.48    0.23
 -25  -1   1    1.49    0.23
 -25  -1   1    1.34    0.19
 -25   1   1    1.49    0.22
  25   1  -1    1.46    0.23
 -25   1   1    1.41    0.21
 -25   1   1    1.34    0.21
 -23  -1   1    2.54    0.30
 -23  -1   1    2.35    0.30
 -23  -1   1    2.68    0.27
 -23   1   1    2.16    0.29
 -23   1   1    2.14    0.26
 -23   1   1    1.98    0.29
  23   1  -1    1.63    0.20
 -23   1   1    2.04    0.29
 -21  -1   1   12.55    0.45
 -21  -1   1   12.79    0.48
 -21  -1   1   13.02    0.47
  21  -1  -1   12.10    0.47
 -21   1   1   12.21    0.47
 -21   1   1   12.05    0.47
  21   1  -1   11.75    0.47
 -21   1   1   12.15    0.42
 -19  -1   1   15.95    0.51
 -19  -1   1   15.22    0.52
  19  -1  -1   15.73    0.52
 -19  -1   1   14.94    0.52
 -19   1   1   15.18    0.52
 -19   1   1   15.89    0.52
 -19   1   1   16.13    0.48
  19   1  -1   15.58    0.53
 -19   1   1   15.77    0.52
  17  -1  -1    5.69    0.26
 -17  -1   1    5.32    0.26
  17  -1  -1    5.60    0.18
 -17  -1   1    5.36    0.25
  17  -1  -1    6.01    0.89
  17  -1  -1    4.92    1.21
 -17   1   1    5.11    0.26
  17   1  -1    5.09    0.26
 -17   1   1    5.22    0.26
 -17   1   1    5.22    0.25
 -17   1   1    5.19    0.22
  15  -1  -1   14.03    0.44
  15  -1  -1   13.47    1.48
  15  -1  -1   13.98    1.52
 -15  -1   1   13.94    0.43
 -15  -1   1   13.68    0.43
  15  -1  -1   14.62    0.91
  15  -1  -1   13.68    0.91
  15  -1  -1   14.35    0.39
 -15   1   1   13.93    0.41
  15   1  -1   13.79    1.11
  15   1  -1   13.37    0.44
 -15   1   1   13.32    0.44
  15   1  -1   12.46    1.62
 -15   1   1   13.37    0.43
 -15   1   1   13.33    0.43
  15   1  -1   13.54    1.86
  15   1  -1   13.84    1.12
 -13  -1   1    2.16    0.15
 -13  -1   1    2.64    0.07
  13  -1  -1    2.62    0.11
 -13  -1   1    2.57    0.08
  13  -1  -1    2.51    0.39
 -13  -1   1    2.13    0.15
  13  -1  -1    2.48    0.67
  13  -1  -1    2.33    0.15
  13   1  -1    2.05    0.46
 -13   1   1    2.06    0.14
  13   1  -1    1.74    0.46
  13   1  -1    1.97    0.15
 -13   1   1    2.03    0.15
  13   1  -1    3.06    0.88
 -13   1   1    2.00    0.11
 -13   1   1    2.06    0.15
  13   1  -1    2.88    0.94
  11  -1  -1   45.10    1.48
 -11  -1   1   44.94    1.13
  11  -1  -1   45.19    1.18
 -11  -1   1   44.12    1.17
  11  -1  -1   44.17    1.78
  11  -1  -1   44.37    1.15
 -11  -1   1   45.25    1.14
 -11   1   1   45.65    1.82
 -11   1   1   43.83    1.18
  11   1  -1   43.30    1.24
 -11   1   1   44.97    1.17
  11   1  -1   45.63    1.15
 -11   1   1   44.79    1.16
  11   1  -1   45.71    1.14
  11   1  -1   42.26    1.62
  11   1  -1   42.06    2.06
  11   1  -1   46.95    2.12
  11   1  -1   46.84    1.65
   9  -1  -1  173.35    4.77
  -9  -1   1  172.95    4.77
   9  -1  -1  199.34    5.03
   9  -1  -1  185.98    5.24
   9   1  -1  187.38    5.18
   9   1  -1  191.21    5.58
   9   1  -1  187.52    5.57
  -9   1   1  200.91    5.03
   9   1  -1  191.13    5.19
  -9   1   1  199.98    5.29
   7  -1  -1  167.02    4.45
   7  -1  -1  163.83    4.27
   7   1  -1  164.29    4.76
  -7   1   1  166.37    4.27
   7   1  -1  150.35    4.10
  -7   1   1  164.92    4.44
   7   1  -1  161.12    4.44
   5  -1  -1  201.26    5.18
  -5  -1   1  193.87    5.20
   5  -1  -1  194.16    5.06
  -5  -1   1  202.57    5.46
   5   1  -1  196.50    5.46
  -5   1   1  191.54    5.05
  -5   1   1  195.21    5.17
   5   1  -1  198.24    5.22
  -3  -1   1  335.52    8.78
   3  -1  -1  342.74    8.57
  -3  -1   1  327.87    8.58
  -3   1   1  332.16    8.46
  -3   1   1  345.23    8.56
   3   1  -1  333.33    8.78
   3   1  -1  315.96    8.57
  -1  -1   1  613.42   15.65
   1   1  -1  605.06   15.65
  -1  -1  -1  464.99   11.54
   1  -1   1  429.38   11.50
  -1  -1  -1  483.49   11.76
   1  -1   1  449.94   11.70
  -1   1  -1  431.86   11.50
   1   1   1  447.40   11.73
  -1   1  -1  447.94   11.69
   3  -1   1   92.89    2.26
   3  -1   1   88.39    2.26
  -3  -1  -1   88.15    2.26
  -3  -1  -1   86.33    2.25
   3  -1   1   89.31    2.26
  -3   1  -1   90.76    2.26
  -3   1  -1   86.97    2.77
  -3   1  -1   91.93    2.26
  -3   1  -1   85.77    2.26
   3   1   1   89.97    2.84
  -3   1  -1   84.26    2.52
   3   1   1   94.08    2.26
  -3   1  -1   92.87    2.25
  -3   1  -1   85.43    2.26
   3   1   1   93.46    2.57
   3   1   1   88.89    2.83
   3   1   1   87.72    2.55
   3   1   1   89.79    2.25
   5  -1   1  411.62   10.53
   5  -1   1  444.04   10.87
   5   1   1  411.75   11.00
  -5   1  -1  394.37   10.51
  -5   1  -1  394.12   10.79
   5   1   1  394.05   10.60
   5   1   1  396.31   10.59
   5   1   1  405.58   10.96
   7  -1   1  369.55   10.11
   7  -1   1  399.80   10.53
  -7   1  -1  382.06   10.12
   7   1   1  385.65   10.22
  -7   1  -1  391.91   10.50
   7   1   1  394.57   10.70
   9  -1   1    5.78    0.56
   9  -1   1    6.29    0.97
   9  -1   1    6.28    0.21
  -9  -1  -1    6.01    0.21
  -9  -1  -1    5.84    0.21
   9  -1   1    6.81    0.18
   9  -1   1    6.29    0.18
   9   1   1    3.95    0.85
   9   1   1    5.89    0.19
   9   1   1    5.66    0.21
  -9   1  -1    5.80    0.21
   9   1   1    6.07    0.16
   9   1   1    4.79    0.70
  -9   1  -1    6.62    0.91
  -9   1  -1    5.52    0.20
  -9   1  -1    6.41    0.19
  -9   1  -1    5.68    0.20
   9   1   1    5.86    0.59
  -9   1  -1    5.70    0.58
   9   1   1    6.88    1.00
  -9   1  -1    5.66    0.19
 -11  -1  -1    2.44    0.15
  11  -1   1    3.99    0.63
  11  -1   1    2.73    0.16
  11  -1   1    3.21    0.89
 -11  -1  -1    2.44    0.15
  11  -1   1    2.81    0.11
 -11   1  -1    2.56    0.15
 -11   1  -1    2.42    0.15
 -11   1  -1    2.65    0.15
  11   1   1    2.95    0.52
 -11   1  -1    2.61    0.80
 -11   1  -1    2.71    0.12
  11   1   1    2.70    0.13
  11   1   1    3.47    0.56
  11   1   1    2.58    0.97
  11   1   1    2.76    0.16
  11   1   1    3.71    0.94
  11   1   1    2.88    0.08
 -11   1  -1    2.25    0.45
  13  -1   1   25.89    1.34
  13  -1   1   26.15    0.65
  13  -1   1   26.57    0.71
 -13  -1  -1   24.22    0.69
  13  -1   1   26.57    2.01
 -13  -1  -1   24.98    0.70
  13   1   1   24.73    0.68
 -13   1  -1   24.77    1.33
 -13   1  -1   24.39    0.70
  13   1   1   24.31    0.70
 -13   1  -1   24.80    0.70
  13   1   1   22.72    1.38
  13   1   1   22.58    2.19
 -13   1  -1   25.60    2.04
 -13   1  -1   25.42    0.68
  13   1   1   22.87    2.12
  13   1   1   23.26    1.40
 -13   1  -1   23.64    0.69
  15  -1   1   13.32    0.34
 -15  -1  -1   12.01    0.41
 -15  -1  -1   12.47    0.40
  15  -1   1   11.28    1.15
  15  -1   1    9.50    1.60
 -15  -1  -1   12.65    0.41
  15  -1   1   12.74    0.41
 -15   1  -1   11.43    0.41
 -15   1  -1   12.35    0.38
 -15   1  -1   12.43    0.41
 -15   1  -1   11.29    0.41
  15   1   1   11.73    0.41
 -17  -1  -1    9.43    0.36
 -17  -1  -1    9.23    0.35
  17  -1   1    9.17    0.36
 -17  -1  -1    9.50    0.37
 -17   1  -1    9.41    0.37
 -17   1  -1    9.19    0.33
 -17   1  -1    9.50    0.37
 -17   1  -1    9.61    0.36
  17   1   1    9.41    0.37
 -19  -1  -1    7.88    0.33
 -19  -1  -1    7.59    0.48
 -19   1  -1    7.48    0.35
 -19   1  -1    7.38    0.31
 -19   1  -1    7.14    0.36
 -19   1  -1    7.93    0.30
 -21  -1  -1    7.33    0.46
 -21  -1  -1    7.40    0.39
 -21  -1  -1    7.98    0.38
 -21  -1  -1    8.08    0.39
 -21  -1  -1    7.69    0.36
 -21   1  -1    7.23    0.39
 -21   1  -1    6.85    0.37
 -21   1  -1    7.20    0.33
  21   1   1    7.67    0.38
 -21   1  -1    7.14    0.38
 -23  -1  -1    1.99    0.27
 -23  -1  -1    1.51    0.22
 -23  -1  -1    2.60    0.34
 -23  -1  -1    1.90    0.24
 -23  -1  -1    1.99    0.29
 -23   1  -1    2.22    0.31
  23   1   1    1.46    0.21
 -23   1  -1    2.20    0.32
 -23   1  -1    1.78    0.22
 -25  -1  -1    7.33    0.43
 -26  -2   1    0.34    0.16
 -26   2   1   -0.09    0.15
 -24  -2   1    1.79    0.22
 -24  -2   1    1.57    0.22
 -24  -2   1    1.11    0.18
 -24   2   1    1.43    0.20
  24   2  -1    1.62    0.23
 -24   2   1    1.29    0.19
 -24   2   1    1.37    0.21
 -24   2   1    1.99    0.29
 -22  -2   1    2.03    0.29
 -22  -2   1    2.02    0.29
 -22  -2   1    2.07    0.26
  22   2  -1    2.31    0.29
 -22   2   1    2.21    0.29
 -22   2   1    1.55    0.19
 -22   2   1    1.88    0.20
 -20  -2   1    4.15    0.46
 -20  -2   1    4.40    0.28
 -20   2   1    4.83    0.23
 -20   2   1    4.29    0.28
 -20   2   1    3.17    0.48
 -20   2   1    4.80    0.28
  20   2  -1    4.02    0.47
 -18  -2   1    6.61    0.30
 -18  -2   1    6.72    0.31
 -18   2   1    6.71    0.31
  18   2  -1    6.74    0.31
 -18   2   1    6.92    0.25
 -18   2   1    6.65    0.29
 -18   2   1    6.34    0.30
 -16  -2   1    2.54    0.20
  16  -2  -1    2.69    0.54
  16  -2  -1    2.80    0.14
  16  -2  -1    1.87    1.01
 -16  -2   1    2.48    0.20
 -16   2   1    3.17    0.21
 -16   2   1    2.92    0.21
  16   2  -1    3.05    0.16
 -16   2   1    2.75    0.18
  16   2  -1    3.31    0.21
 -16   2   1    2.91    0.19
 -14  -2   1   10.37    0.35
 -14  -2   1   10.97    0.29
 -14  -2   1    9.85    0.35
  14  -2  -1   10.50    0.32
  14  -2  -1   10.31    0.76
  14  -2  -1    9.56    1.28
 -14   2   1   10.25    0.35
  14   2  -1   11.91    1.96
  14   2  -1   10.30    1.12
 -14   2   1   10.18    0.36
 -14   2   1   10.35    0.31
  14   2  -1   10.68    0.36
  14   2  -1   12.16    1.64
  14   2  -1   11.10    1.07
 -14   2   1   10.43    0.75
 -14   2   1   10.60    1.24
 -14   2   1   10.71    0.34
  14   2  -1   10.52    0.31
 -12  -2   1   22.77    0.60
  12  -2  -1   22.24    0.62
  12  -2  -1   20.25    1.36
  12  -2  -1   22.02    0.98
 -12  -2   1   20.91    0.57
 -12  -2   1   22.17    0.64
  12   2  -1   22.30    1.22
 -12   2   1   22.28    0.97
 -12   2   1   22.93    0.64
  12   2  -1   25.16    2.02
  12   2  -1   23.23    0.61
 -12   2   1   23.47    1.39
 -12   2   1   23.05    0.60
  12   2  -1   23.27    1.30
 -12   2   1   23.41    0.62
  12   2  -1   23.35    0.64
  12   2  -1   23.13    1.85
 -12   2   1   23.81    0.58
 -12   2   1   22.74    0.64
 -10  -2   1   32.32    0.89
 -10  -2   1   33.71    0.85
  10  -2  -1   32.80    0.88
  10  -2  -1   32.19    1.49
 -10  -2   1   32.55    0.89
  10  -2  -1   34.10    1.18
 -10  -2   1   34.32    0.86
 -10  -2   1   34.27    0.85
 -10   2   1   32.96    0.86
 -10   2   1   33.27    1.18
  10   2  -1   34.57    1.46
 -10   2   1   34.41    0.85
  10   2  -1   33.39    0.88
  10   2  -1   33.00    0.87
  10   2  -1   32.73    0.89
  10   2  -1   34.93    1.99
 -10   2   1   33.19    0.90
 -10   2   1   33.33    0.89
 -10   2   1   33.15    1.50
 -10   2   1   33.06    0.88
  -8  -2   1   33.58    0.88
  -8  -2   1   33.59    0.86
  -8  -2   1   30.05    1.31
  -8  -2   1   29.82    1.75
   8  -2  -1   33.49    0.87
  -8  -2   1   33.99    0.88
   8  -2  -1   33.54    1.13
   8  -2  -1   31.87    1.36
  -8   2   1   33.17    0.88
   8   2  -1   32.65    0.88
  -8   2   1   33.43    0.86
  -8   2   1   33.37    0.88
  -8   2   1   35.45    0.85
   8   2  -1   33.50    0.87
   8   2  -1   33.10    0.84
  -8   2   1   34.21    0.85
  -8   2   1   33.30    0.87
  -8   2   1   33.27    1.39
   8   2  -1   33.55    0.86
  -8   2   1   33.06    0.85
   8   2  -1   34.75    1.80
  -8   2   1   33.42    1.12
   8   2  -1   33.29    1.35
  -6  -2   1    4.65    0.16
   6  -2  -1    4.87    0.17
  -6  -2   1    4.55    0.76
  -6  -2   1    3.91    0.53
  -6  -2   1    4.53    0.17
  -6  -2   1    4.78    0.16
  -6  -2   1    4.95    0.16
   6  -2  -1    4.66    0.36
   6  -2  -1    4.55    0.58
  -6  -2   1    4.91    0.14
   6  -2  -1    4.64    0.15
   6  -2  -1    5.23    0.16
   6   2  -1    5.28    0.17
   6   2  -1    5.35    0.17
   6   2  -1    5.13    0.17
  -6   2   1    5.52    0.18
  -6   2   1    5.69    0.15
  -6   2   1    5.40    0.17
  -6   2   1    5.16    0.62
   6   2  -1    5.63    0.16
  -6   2   1    5.61    0.16
  -6   2   1    5.88    0.14
   6   2  -1    5.09    0.84
  -6   2   1    5.95    0.40
   6   2  -1    5.41    0.52
   6   2  -1    5.67    0.15
  -6   2   1    5.56    0.17
  -6   2   1    5.54    0.16
   4  -2  -1  113.04    2.62
  -4  -2   1   97.31    2.61
   4  -2  -1  105.97    2.61
   4  -2  -1  102.11    2.61
  -4  -2   1  102.01    2.99
   4  -2  -1  102.89    3.08
   4  -2  -1   95.59    2.61
  -4  -2   1   99.71    3.32
   4  -2  -1   98.64    2.84
  -4  -2   1  103.75    2.61
  -4  -2   1   97.65    2.61
   4   2  -1  106.97    2.60
   4   2  -1  100.92    2.99
  -4   2   1  111.60    3.11
   4   2  -1  105.02    2.61
  -4   2   1  107.24    2.61
   4   2  -1   99.49    3.31
   4   2  -1   99.95    2.61
  -4   2   1  111.07    2.87
   2  -2  -1   17.06    0.45
  -2  -2   1   19.47    0.46
  -2  -2   1   17.46    0.46
   2  -2  -1   17.31    0.47
   2  -2  -1   17.16    0.46
  -2  -2   1   18.45    0.47
   2  -2  -1   18.29    0.47
   2  -2  -1   18.84    0.47
  -2  -2   1   18.43    0.46
  -2  -2   1   18.07    0.46
  -2  -2   1   18.02    0.47
  -2  -2   1   18.07    0.46
  -2  -2   1   18.17    0.47
   2  -2  -1   16.98    0.47
   2  -2  -1   17.51    0.47
  -2  -2   1   17.51    0.47
  -2  -2   1   18.55    0.81
   2  -2  -1   17.67    0.45
  -2  -2   1   17.53    1.11
  -2   2   1   17.59    0.47
  -2   2   1   17.03    0.93
  -2   2   1   18.33    0.47
   2   2  -1   17.38    0.47
  -2   2   1   17.15    0.46
  -2   2   1   17.15    0.47
   2   2  -1   16.55    0.77
  -2   2   1   17.61    0.45
  -2   2   1   17.96    0.47
  -2   2   1   17.86    0.46
  -2   2   1   16.09    0.71
   2   2  -1   16.32    0.47
   2   2  -1   17.55    0.46
  -2   2   1   17.56    0.47
  -2   2   1   17.53    0.47
   2   2  -1   18.64    0.46
   2   2  -1   17.93    0.47
   2   2  -1   17.10    0.46
   2   2  -1   17.77    1.07
   0  -2   1  368.44    9.78
   0  -2   1  385.64   10.13
   0  -2  -1  391.28   10.10
   0  -2  -1  380.57    9.78
   0   2   1  367.39    9.76
   0   2  -1  378.93   10.10
   0   2   1  364.14   10.05
   0   2  -1  373.64    9.78
  -2  -2  -1   29.99    0.78
  -2  -2  -1   29.47    0.78
  -2  -2  -1   28.10    1.11
   2  -2   1   29.83    1.37
  -2  -2  -1   29.23    0.77
   2  -2   1   29.77    0.76
   2  -2   1   30.70    0.78
   2  -2   1   29.72    0.78
   2  -2   1   29.96    1.10
   2  -2   1   29.65    0.78
  -2  -2  -1   26.97    1.41
   2  -2   1   30.43    0.77
  -2  -2  -1   28.82    0.77
  -2  -2  -1   29.78    0.77
  -2  -2  -1   29.19    0.78
   2  -2   1   28.98    0.77
  -2  -2  -1   30.14    0.77
  -2  -2  -1   31.11    0.78
  -2   2  -1   30.50    1.34
   2   2   1   29.82    0.78
   2   2   1   31.72    0.77
   2   2   1   30.19    0.77
   2   2   1   29.53    0.78
   2   2   1   31.75    0.78
  -2   2  -1   31.29    1.09
   2   2   1   30.14    0.78
  -2   2  -1   29.36    0.78
  -2   2  -1   30.33    0.78
  -2   2  -1   31.16    0.77
   2   2   1   30.98    1.44
   2   2   1   32.49    0.78
  -2   2  -1   29.25    0.78
  -2   2  -1   29.75    0.77
   2   2   1   31.78    0.77
   2   2   1   30.55    1.14
   2   2   1   28.69    0.78
   4  -2   1   81.55    2.08
   4  -2   1   79.29    2.09
   4  -2   1   83.60    2.45
  -4  -2  -1   82.92    2.09
  -4  -2  -1   78.09    2.52
   4  -2   1   80.58    2.76
  -4  -2  -1   77.11    2.89
   4  -2   1   78.75    2.09
  -4  -2  -1   83.26    2.09
  -4  -2  -1   82.86    2.09
   4  -2   1   84.40    2.09
   4   2   1   87.22    2.09
   4   2   1   80.62    2.09
   4   2   1   81.95    2.09
   4   2   1   82.50    2.54
   4   2   1   84.08    2.96
  -4   2  -1   78.81    2.10
  -4   2  -1   80.60    2.09
  -4   2  -1   89.14    2.80
  -4   2  -1   88.71    2.47
  -4   2  -1   79.73    2.09
   4   2   1   87.27    2.08
  -4   2  -1   84.39    2.08
  -4   2  -1   80.72    2.09
   4   2   1   78.27    2.09
   4   2   1   80.06    2.09
   4   2   1   86.29    2.08
   6  -2   1   30.78    1.49
  -6  -2  -1   30.78    0.77
   6  -2   1   29.96    0.75
   6  -2   1   29.57    0.77
  -6  -2  -1   29.48    0.76
   6  -2   1   29.49    1.14
  -6  -2  -1   29.54    0.77
   6  -2   1   31.84    0.75
  -6  -2  -1   29.64    0.74
   6  -2   1   30.66    0.77
   6   2   1   28.47    0.76
  -6   2  -1   26.94    1.46
   6   2   1   28.87    0.74
  -6   2  -1   28.84    0.74
  -6   2  -1   27.85    0.75
   6   2   1   28.16    1.72
  -6   2  -1   30.48    0.75
  -6   2  -1   28.75    0.77
  -6   2  -1   28.89    0.77
  -6   2  -1   27.27    1.12
   6   2   1   30.34    0.74
   6   2   1   28.57    0.77
   6   2   1   26.42    1.69
   6   2   1   27.83    1.26
   6   2   1   28.04    1.25
   6   2   1   28.73    0.77
  -6   2  -1   28.82    0.76
  -8  -2  -1   19.40    0.52
  -8  -2  -1   19.99    0.55
   8  -2   1   19.27    0.94
   8  -2   1   20.51    0.54
   8  -2   1   19.79    0.53
  -8  -2  -1   19.60    0.54
   8  -2   1   20.99    1.36
  -8   2  -1   19.37    0.54
   8   2   1   19.43    0.54
   8   2   1   19.79    1.61
  -8   2  -1   20.36    0.51
  -8   2  -1   19.94    0.52
  -8   2  -1   19.56    0.95
  -8   2  -1   19.90    0.51
   8   2   1   16.92    1.61
  -8   2  -1   19.94    1.37
   8   2   1   18.95    0.53
  -8   2  -1   19.81    0.54
   8   2   1   19.55    0.54
  -8   2  -1   19.42    0.55
   8   2   1   18.40    1.08
   8   2   1   20.91    1.09
 -10  -2  -1   13.43    0.41
  10  -2   1   12.88    0.86
  10  -2   1   14.42    0.39
 -10  -2  -1   13.43    0.41
  10  -2   1   12.13    1.34
 -10   2  -1   13.26    0.87
 -10   2  -1   13.62    0.41
 -10   2  -1   13.49    0.41
  10   2   1   15.10    1.80
  10   2   1   13.29    1.76
  10   2   1   13.39    1.05
 -10   2  -1   13.83    0.40
 -10   2  -1   13.95    0.38
 -10   2  -1   15.50    0.38
  10   2   1   13.33    1.09
 -10   2  -1   14.05    0.35
  10   2   1   13.68    0.39
 -10   2  -1   13.48    1.38
  10   2   1   13.84    0.41
  12  -2   1    2.05    0.90
 -12  -2  -1    1.93    0.16
  12  -2   1    2.85    0.54
 -12  -2  -1    2.05    0.16
  12  -2   1    2.19    0.12
  12   2   1    1.77    0.60
 -12   2  -1    1.72    0.16
  12   2   1    1.98    0.13
 -12   2  -1    1.94    0.11
 -12   2  -1    1.26    0.84
 -12   2  -1    1.86    0.16
 -12   2  -1    1.55    0.47
  12   2   1    1.01    1.23
 -12   2  -1    1.72    0.15
  12   2   1    1.82    0.16
  14  -2   1    0.49    1.10
  14  -2   1    1.83    0.59
 -14  -2  -1    1.46    0.17
 -14  -2  -1    1.56    0.18
 -14   2  -1    1.23    0.17
  14   2   1    1.41    0.71
 -14   2  -1    1.35    0.56
  14   2   1    1.30    0.65
 -14   2  -1    1.34    0.17
  14   2   1    2.35    1.33
 -14   2  -1    1.25    1.14
 -14   2  -1    1.25    0.15
  14   2   1    1.23    0.14
  14   2   1    1.75    1.38
  14   2   1    1.19    0.17
 -14   2  -1    1.20    0.16
 -16  -2  -1    6.86    0.31
 -16  -2  -1    7.43    0.31
  16  -2   1    7.36    0.24
  16   2   1    7.03    0.28
 -16   2  -1    7.39    0.31
  16   2   1    7.50    0.32
 -16   2  -1    7.18    0.32
 -16   2  -1    7.44    0.27
 -16   2  -1    7.25    0.31
 -16   2  -1    7.47    0.23
 -18  -2  -1    0.46    0.12
 -18  -2  -1    0.25    0.14
 -18  -2  -1    0.29    0.13
  18   2   1    0.11    0.13
 -18   2  -1    0.27    0.22
 -18   2  -1    0.31    0.10
 -18   2  -1    0.24    0.13
 -18   2  -1    0.27    0.12
 -20  -2  -1   11.10    0.45
 -20  -2  -1   11.52    0.46
 -20  -2  -1   11.72    0.44
 -20  -2  -1   10.92    0.44
 -20   2  -1   11.58    0.47
 -20   2  -1   11.50    0.46
 -20   2  -1   11.46    0.44
  20   2   1   11.66    0.47
 -22  -2  -1    9.27    0.41
 -22  -2  -1    9.01    0.42
 -22  -2  -1    8.92    0.44
 -22  -2  -1    8.48    0.44
 -22   2  -1    9.20    0.45
  22   2   1    9.46    0.46
 -22   2  -1    9.17    0.42
 -22   2  -1    9.72    0.44
 -24  -2  -1    0.77    0.20
 -24  -2  -1    0.82    0.17
 -24  -2  -1    0.34    0.17
 -24  -2  -1    0.92    0.26
 -24  -2  -1    0.71    0.20
 -24   2  -1    0.63    0.19
  24   2   1    0.83    0.23
 -24   2  -1    1.13    0.20
 -24   2  -1    0.91    0.24
 -25  -3   1    2.51    0.31
 -25  -3   1    1.81    0.24
 -25   3   1    3.03    0.31
 -25   3   1    2.48    0.30
 -23  -3   1    7.13    0.40
 -23  -3   1    7.21    0.42
 -23  -3   1    7.01    0.42
 -23   3   1    7.46    0.38
 -23   3   1    7.29    0.37
 -23   3   1    7.51    0.41
 -23   3   1    7.51    0.41
  23   3  -1    7.80    0.42
 -21  -3   1    5.44    0.34
 -21  -3   1    5.13    0.32
 -21   3   1    5.56    0.33
 -21   3   1    5.08    0.30
 -21   3   1    5.57    0.33
  21   3  -1    4.95    0.33
 -19  -3   1    4.13    0.32
 -19  -3   1    4.64    0.28
  19   3  -1    4.38    0.30
 -19   3   1    4.61    0.26
 -19   3   1    4.42    0.26
 -19   3   1    4.41    0.29
 -19   3   1    4.36    0.34
  17  -3  -1    6.76    1.54
 -17  -3   1    6.18    0.31
 -17  -3   1    6.34    0.30
  17  -3  -1    6.99    0.28
  17   3  -1    6.36    0.31
 -17   3   1    6.99    0.28
 -17   3   1    6.62    0.31
  17   3  -1    6.72    0.26
 -17   3   1    6.79    0.31
 -17   3   1    6.61    0.29
 -17   3   1    7.15    0.22
 -15  -3   1   27.27    0.80
  15  -3  -1   26.30    1.98
  15  -3  -1   28.65    0.78
 -15  -3   1   28.97    0.75
 -15  -3   1   28.79    0.81
  15  -3  -1   27.69    1.32
  15   3  -1   32.04    2.07
 -15   3   1   27.40    0.80
 -15   3   1   28.37    0.78
  15   3  -1   27.90    0.77
 -15   3   1   30.92    1.92
  15   3  -1   28.26    0.81
 -15   3   1   27.97    0.75
 -15   3   1   27.68    0.79
  15   3  -1   27.05    3.21
 -15   3   1   27.95    0.81
 -15   3   1   29.49    1.30
 -13  -3   1   17.97    0.48
 -13  -3   1   17.07    0.52
  13  -3  -1   16.93    1.48
  13  -3  -1   18.59    0.98
 -13  -3   1   17.51    0.53
  13  -3  -1   18.63    0.51
 -13   3   1   18.18    0.51
  13   3  -1   16.78    0.51
  13   3  -1   17.75    1.37
 -13   3   1   18.08    0.93
 -13   3   1   17.23    0.53
 -13   3   1   17.48    0.47
 -13   3   1   16.89    1.40
  13   3  -1   17.44    0.49
 -13   3   1   16.86    0.51
  13   3  -1   17.18    2.32
 -13   3   1   17.41    0.52
  13   3  -1   16.81    0.52
  11  -3  -1   63.27    2.08
 -11  -3   1   66.42    1.68
 -11  -3   1   67.01    1.66
  11  -3  -1   62.50    2.51
 -11  -3   1   67.61    1.66
 -11  -3   1   63.88    1.70
 -11  -3   1   65.17    1.70
 -11   3   1   66.49    1.68
  11   3  -1   63.59    1.69
  11   3  -1   65.07    3.24
  11   3  -1   65.77    1.68
 -11   3   1   67.26    2.10
 -11   3   1   64.60    1.66
  11   3  -1   68.07    2.49
 -11   3   1   64.17    1.70
 -11   3   1   65.82    1.66
 -11   3   1   65.51    1.70
 -11   3   1   66.96    2.52
 -11   3   1   63.02    1.70
  11   3  -1   65.05    1.70
  -9  -3   1   80.78    2.10
  -9  -3   1   80.88    2.08
   9  -3  -1   83.78    2.88
  -9  -3   1   74.33    3.76
  -9  -3   1   74.50    2.96
  -9  -3   1   76.94    2.12
   9  -3  -1   79.31    2.46
  -9  -3   1   82.32    2.07
   9  -3  -1   77.14    2.10
  -9   3   1   81.75    2.08
   9   3  -1   91.82    3.52
  -9   3   1   82.82    2.10
   9   3  -1   81.05    2.10
  -9   3   1   84.12    2.47
  -9   3   1   87.01    2.89
  -9   3   1   80.43    2.10
   9   3  -1   81.10    2.08
  -9   3   1   81.89    2.06
   9   3  -1   83.63    2.06
   9   3  -1   86.37    2.81
  -9   3   1   84.43    2.06
  -7  -3   1   51.20    2.52
   7  -3  -1   56.77    1.38
   7  -3  -1   55.45    1.41
  -7  -3   1   51.37    1.99
   7  -3  -1   55.42    1.77
  -7  -3   1   55.43    1.41
   7  -3  -1   55.99    2.13
   7  -3  -1   54.00    1.37
  -7  -3   1   57.10    1.39
  -7  -3   1   55.16    1.39
   7   3  -1   53.75    1.39
  -7   3   1   51.38    2.13
  -7   3   1   53.23    1.38
   7   3  -1   54.44    1.41
   7   3  -1   53.56    2.54
  -7   3   1   54.78    1.37
  -7   3   1   53.94    1.41
  -7   3   1   53.77    1.77
   7   3  -1   55.81    1.38
  -7   3   1   53.60    1.40
   7   3  -1   52.69    1.99
   7   3  -1   54.31    1.40
   7   3  -1   52.33    1.40
  -7   3   1   53.35    1.40
  -5  -3   1   30.51    0.80
   5  -3  -1   31.63    0.78
  -5  -3   1   30.50    0.80
   5  -3  -1   31.04    0.81
  -5  -3   1   30.82    0.79
  -5  -3   1   30.94    0.79
   5  -3  -1   26.98    1.44
   5  -3  -1   29.66    0.78
   5  -3  -1   30.99    0.80
   5  -3  -1   29.72    1.16
  -5  -3   1   27.97    1.86
  -5  -3   1   27.10    1.32
  -5  -3   1   30.32    0.80
   5   3  -1   30.54    0.81
   5   3  -1   32.12    0.79
   5   3  -1   31.14    0.81
  -5   3   1   31.25    0.78
  -5   3   1   29.80    1.17
  -5   3   1   31.47    0.80
   5   3  -1   30.83    0.80
   5   3  -1   31.13    0.79
  -5   3   1   28.76    1.53
   5   3  -1   29.42    1.78
  -5   3   1   31.59    0.78
   5   3  -1   31.67    1.34
  -5   3   1   31.09    0.81
  -5   3   1   30.59    0.80
  -5   3   1   30.30    0.80
   3  -3  -1    7.33    0.98
  -3  -3   1    8.38    0.75
   3  -3  -1    9.33    0.26
   3  -3  -1    9.37    0.27
   3  -3  -1    9.45    0.25
  -3  -3   1    9.67    0.27
   3  -3  -1    8.84    0.69
  -3  -3   1    7.95    1.23
   3  -3  -1    8.27    0.25
  -3  -3   1    9.08    0.28
  -3  -3   1    9.16    0.27
  -3  -3   1    9.18    0.28
  -3  -3   1    9.47    0.27
   3   3  -1    9.96    0.28
  -3   3   1    9.89    0.28
  -3   3   1   10.08    0.25
   3   3  -1    9.88    0.28
   3   3  -1    9.85    0.70
   3   3  -1   10.03    0.27
  -3   3   1    9.98    0.28
  -3   3   1    9.32    0.62
  -3   3   1   10.37    0.97
   3   3  -1    9.95    0.28
   3   3  -1    9.80    0.27
  -3   3   1    9.73    0.28
  -3   3   1    9.35    0.28
   3   3  -1    9.78    1.08
  -1  -3   1   28.11    1.21
  -1  -3   1   27.27    0.72
   1  -3  -1   29.35    0.73
   1  -3  -1   26.79    0.72
   1  -3  -1   28.39    0.70
  -1  -3   1   28.02    0.73
  -1  -3   1   29.20    0.72
  -1  -3   1   27.41    1.66
  -1  -3   1   27.51    0.73
  -1  -3   1   27.39    0.73
   1  -3  -1   28.94    0.73
   1  -3  -1   28.42    0.73
   1  -3  -1   27.21    1.14
   1  -3  -1   27.15    0.71
   1  -3  -1   27.34    1.50
  -1   3   1   25.72    1.43
  -1   3   1   28.12    0.73
   1   3  -1   26.70    0.73
   1   3  -1   27.16    0.73
   1   3  -1   27.85    1.17
   1   3  -1   27.44    0.73
   1   3  -1   27.81    0.73
   1   3  -1   28.90    1.56
  -1   3   1   27.55    0.72
  -1   3   1   29.21    0.71
  -1   3   1   25.26    1.10
  -1   3   1   27.76    0.73
   1   3  -1   27.18    0.72
  -1   3   1   27.78    0.73
   1  -3   1  218.32    6.23
   1  -3   1  217.48    5.76
  -1  -3  -1  214.36    6.27
  -1  -3  -1  217.35    5.79
  -1   3  -1  197.17    6.12
   1   3   1  199.56    5.74
   1   3   1  197.55    6.17
  -1   3  -1  207.37    5.74
   3  -3   1   19.56    0.56
  -3  -3  -1   20.76    0.56
  -3  -3  -1   20.49    0.56
  -3  -3  -1   20.97    0.56
   3  -3   1   20.49    0.57
   3  -3   1   20.38    0.56
   3  -3   1   21.34    0.54
  -3  -3  -1   20.63    1.07
   3  -3   1   17.12    1.52
   3  -3   1   18.11    1.09
  -3  -3  -1   19.17    1.52
  -3  -3  -1   20.80    0.55
   3  -3   1   21.35    0.55
  -3   3  -1   20.88    0.95
   3   3   1   22.00    0.56
  -3   3  -1   21.59    0.57
   3   3   1   24.32    1.56
   3   3   1   21.43    0.56
   3   3   1   21.96    1.08
  -3   3  -1   22.02    0.57
   3   3   1   21.53    0.56
   3   3   1   21.84    0.57
  -3   3  -1   22.40    0.55
  -3   3  -1   20.34    1.29
   3   3   1   21.90    0.56
  -5  -3  -1  107.48    2.80
  -5  -3  -1  118.87    3.49
   5  -3   1  106.29    2.82
   5  -3   1  109.14    2.81
  -5  -3  -1  108.65    2.81
   5  -3   1  104.09    3.71
  -5  -3  -1  118.16    4.12
   5  -3   1  106.62    3.28
   5  -3   1  109.09    2.82
  -5  -3  -1  109.26    2.82
  -5  -3  -1  107.80    2.82
   5  -3   1  110.55    2.79
   5   3   1  110.44    2.82
   5   3   1  113.15    4.04
  -5   3  -1  110.70    2.81
  -5   3  -1  115.24    3.79
  -5   3  -1  117.71    3.32
  -5   3  -1  109.41    2.83
   5   3   1  110.43    2.82
  -5   3  -1  110.48    2.82
  -5   3  -1  109.58    2.82
   5   3   1  118.55    2.80
   5   3   1  111.71    3.46
   5   3   1  110.36    2.82
   5   3   1  111.81    2.82
   7  -3   1   53.70    2.39
  -7  -3  -1   55.43    1.44
   7  -3   1   55.58    1.46
   7  -3   1   58.07    1.43
  -7  -3  -1   53.59    1.43
   7  -3   1   55.01    1.44
   7  -3   1   57.19    1.45
  -7  -3  -1   54.93    1.46
  -7  -3  -1   54.27    1.45
   7  -3   1   56.65    1.97
  -7   3  -1   60.10    2.47
  -7   3  -1   57.28    1.46
   7   3   1   56.98    2.72
   7   3   1   54.92    1.46
  -7   3  -1   55.90    1.42
  -7   3  -1   56.51    1.45
   7   3   1   57.56    1.45
  -7   3  -1   51.23    1.47
   7   3   1   57.04    1.46
   7   3   1   58.91    1.42
  -7   3  -1   59.74    1.97
   7   3   1   55.98    1.46
   7   3   1   57.05    2.14
  -7   3  -1   56.79    1.47
   9  -3   1   21.44    1.16
  -9  -3  -1   25.03    0.59
   9  -3   1   20.66    1.68
   9  -3   1   24.24    0.61
   9  -3   1   23.81    0.64
  -9  -3  -1   24.24    0.62
  -9  -3  -1   24.09    0.65
  -9  -3  -1   24.08    0.65
   9   3   1   25.41    2.32
  -9   3  -1   20.23    0.59
  -9   3  -1   20.71    1.70
   9   3   1   25.95    1.42
  -9   3  -1   23.01    0.64
  -9   3  -1   22.67    0.63
  -9   3  -1   21.90    0.65
  -9   3  -1   23.79    1.17
  -9   3  -1   23.46    0.61
   9   3   1   23.72    0.63
   9   3   1   23.12    0.65
   9   3   1   25.79    2.13
  -9   3  -1   23.15    0.65
   9   3   1   23.08    0.64
   9   3   1   22.28    1.43
  11  -3   1    8.51    0.89
 -11  -3  -1    8.07    0.30
 -11  -3  -1    8.14    0.30
  11  -3   1    7.46    1.23
 -11   3  -1    8.12    1.19
 -11   3  -1    8.88    0.86
 -11   3  -1    9.18    0.23
 -11   3  -1    8.62    0.25
 -11   3  -1    7.94    0.30
  11   3   1    7.64    1.40
  11   3   1    9.77    1.91
 -11   3  -1    8.12    0.31
  11   3   1    8.85    1.25
  11   3   1    8.93    0.30
 -11   3  -1    8.60    0.23
 -11   3  -1    8.50    0.29
 -11   3  -1    8.47    0.30
  11   3   1    8.74    0.28
 -11   3  -1    8.83    0.24
  11   3   1    9.14    2.15
  11   3   1    8.46    0.30
 -13  -3  -1   20.76    0.63
  13  -3   1   22.24    0.61
 -13  -3  -1   22.02    0.63
  13  -3   1   20.14    2.27
  13  -3   1   20.47    1.34
 -13   3  -1   21.93    0.58
 -13   3  -1   21.27    0.64
  13   3   1   18.89    1.65
 -13   3  -1   21.30    2.14
 -13   3  -1   22.64    1.33
  13   3   1   21.79    0.61
  13   3   1   21.37    0.63
 -13   3  -1   22.60    0.56
  13   3   1   16.13    2.82
  13   3   1   20.73    1.66
 -13   3  -1   21.23    0.63
  13   3   1   21.67    2.82
 -13   3  -1   21.91    0.64
 -13   3  -1   22.84    0.62
 -15  -3  -1   18.40    0.58
 -15  -3  -1   18.54    0.58
  15  -3   1   19.23    0.55
 -15   3  -1   18.96    0.56
 -15   3  -1   18.18    0.58
  15   3   1   18.77    0.58
 -15   3  -1   19.02    0.52
 -15   3  -1   17.67    0.57
 -15   3  -1   18.70    0.58
  15   3   1   18.55    0.55
  17  -3   1    2.54    0.21
 -17  -3  -1    2.37    0.23
 -17  -3  -1    2.62    0.24
  17   3   1    2.42    0.23
 -17   3  -1    3.04    0.25
  17   3   1    2.63    0.21
 -17   3  -1    3.04    0.26
 -17   3  -1    2.54    0.22
 -17   3  -1    2.82    0.23
 -19  -3  -1   15.00    0.55
 -19  -3  -1   15.67    0.54
 -19  -3  -1   15.71    0.53
 -19   3  -1   15.68    0.55
 -19   3  -1   15.49    0.54
 -19   3  -1   15.17    0.55
  19   3   1   16.00    0.55
 -19   3  -1   15.62    0.55
 -21  -3  -1   23.35    0.74
 -21  -3  -1   22.81    0.72
 -21  -3  -1   23.13    0.74
 -21  -3  -1   23.19    0.75
 -21   3  -1   22.18    0.72
  21   3   1   21.49    0.80
 -21   3  -1   22.90    0.75
 -21   3  -1   22.08    0.75
 -21   3  -1   22.92    0.73
 -23  -3  -1    1.73    0.21
 -23  -3  -1    1.82    0.23
 -23  -3  -1    1.95    0.24
 -23  -3  -1    2.01    0.25
  23   3   1    1.58    0.22
 -23   3  -1    2.03    0.26
 -23   3  -1    2.65    0.31
 -23   3  -1    2.82    0.31
 -24  -4   1    4.54    0.44
 -24  -4   1    4.20    0.45
 -24  -4   1    4.67    0.39
 -24  -4   1    4.69    0.36
  24   4  -1    4.68    0.41
 -24   4   1    4.93    0.46
 -24   4   1    4.06    0.35
 -22  -4   1    2.96    0.32
 -22  -4   1    2.99    0.34
 -22   4   1    2.93    0.32
 -22   4   1    2.72    0.26
  22   4  -1    2.81    0.32
 -22   4   1    2.51    0.30
 -22   4   1    2.78    0.33
 -20  -4   1    5.28    0.33
 -20  -4   1    5.05    0.33
 -20   4   1    5.82    0.34
 -20   4   1    5.85    0.29
  20   4  -1    5.52    0.34
 -20   4   1    5.77    0.32
 -20   4   1    5.40    0.34
 -18  -4   1   22.02    0.69
  18  -4  -1   21.62    0.66
  18   4  -1   21.89    0.63
 -18   4   1   21.85    0.69
  18   4  -1   22.14    0.69
 -18   4   1   20.80    0.75
 -18   4   1   22.01    0.66
 -18   4   1   22.07    0.65
 -16  -4   1   10.78    0.33
 -16  -4   1   10.71    0.40
  16  -4  -1   11.23    0.39
 -16  -4   1   10.90    0.40
 -16   4   1   10.66    0.36
  16   4  -1   10.82    0.35
  16   4  -1   10.43    0.40
 -16   4   1    9.73    1.49
 -16   4   1   10.40    0.40
 -16   4   1   10.13    0.40
 -16   4   1   10.39    0.38
 -16   4   1   10.89    1.05
  14  -4  -1   14.37    1.96
 -14  -4   1   14.11    0.41
 -14  -4   1   13.38    0.45
  14  -4  -1   13.74    1.09
  14  -4  -1   13.66    0.45
 -14  -4   1   13.62    0.46
  14   4  -1   13.38    1.48
 -14   4   1   15.75    1.81
 -14   4   1   14.15    0.42
  14   4  -1    9.49    2.06
  14   4  -1   14.01    0.42
 -14   4   1   14.30    1.02
  14   4  -1   14.05    0.46
 -14   4   1   13.91    0.45
  14   4  -1   14.08    0.45
 -14   4   1   13.31    0.46
 -14   4   1   14.46    0.45
  12  -4  -1    8.55    0.32
  12  -4  -1    9.80    1.62
 -12  -4   1    8.69    0.32
 -12  -4   1    8.77    0.26
 -12  -4   1    8.71    0.29
 -12  -4   1    8.68    0.33
  12  -4  -1    8.86    0.87
  12   4  -1    9.40    0.32
  12   4  -1    8.38    1.84
 -12   4   1    9.61    0.32
  12   4  -1    8.36    1.26
 -12   4   1    9.42    0.28
  12   4  -1    9.26    0.33
 -12   4   1    9.72    1.60
  12   4  -1   10.04    0.30
 -12   4   1    8.91    0.33
 -12   4   1    9.37    0.33
 -12   4   1    9.47    0.87
 -10  -4   1   82.60    2.16
 -10  -4   1   81.94    4.06
  10  -4  -1   79.51    3.23
  10  -4  -1   80.96    2.66
 -10  -4   1   80.98    2.15
 -10  -4   1   83.77    2.12
 -10  -4   1   78.49    2.16
 -10  -4   1   82.13    3.08
  10  -4  -1   82.30    2.16
 -10   4   1   82.50    2.16
 -10   4   1   83.63    3.18
  10   4  -1   82.18    2.15
  10   4  -1   83.49    2.13
  10   4  -1   84.51    2.16
  10   4  -1   84.16    2.10
  10   4  -1   90.43    4.05
  10   4  -1   88.41    3.11
 -10   4   1   83.26    2.15
  10   4  -1   82.93    2.15
 -10   4   1   81.37    2.15
 -10   4   1   87.49    2.68
 -10   4   1   86.41    2.13
   8  -4  -1   37.54    1.49
   8  -4  -1   35.35    0.90
  -8  -4   1   29.12    2.51
  -8  -4   1   35.90    0.95
  -8  -4   1   34.22    0.94
   8  -4  -1   34.29    1.98
   8  -4  -1   36.17    0.96
  -8  -4   1   36.20    0.93
  -8  -4   1   30.22    3.99
  -8   4   1   35.39    0.95
   8   4  -1   36.06    0.93
   8   4  -1   35.81    0.95
   8   4  -1   35.01    2.41
  -8   4   1   36.71    0.92
  -8   4   1   34.81    0.94
   8   4  -1   35.54    0.95
  -8   4   1   35.03    2.01
  -8   4   1   35.55    1.46
   8   4  -1   38.12    1.77
   8   4  -1   35.70    0.95
  -8   4   1   35.72    0.95
  -8   4   1   34.26    0.95
   6  -4  -1   63.60    1.65
  -6  -4   1   64.52    1.65
   6  -4  -1   63.02    1.62
  -6  -4   1   62.92    1.65
   6  -4  -1   66.92    1.62
  -6  -4   1   68.08    2.47
  -6  -4   1   64.39    1.65
  -6  -4   1   69.60    3.29
  -6   4   1   63.98    2.20
   6   4  -1   62.89    2.37
   6   4  -1   62.59    1.67
  -6   4   1   60.39    2.70
   6   4  -1   64.40    1.65
  -6   4   1   63.69    1.62
   6   4  -1   63.34    1.66
  -6   4   1   63.30    1.65
   6   4  -1   64.08    3.02
  -6   4   1   62.32    1.65
  -4  -4   1   83.21    2.10
  -4  -4   1   79.26    3.49
  -4  -4   1   82.36    2.10
   4  -4  -1   71.94    3.03
   4  -4  -1   79.53    2.62
   4  -4  -1   79.64    2.11
  -4  -4   1   82.12    2.10
  -4  -4   1   81.19    2.11
   4  -4  -1   82.23    2.10
   4  -4  -1   82.87    2.07
   4  -4  -1   79.97    2.08
  -4  -4   1   83.38    2.84
   4   4  -1   81.89    2.09
   4   4  -1   82.53    2.11
   4   4  -1   84.93    3.45
  -4   4   1   88.00    3.23
   4   4  -1   84.58    2.10
  -4   4   1   80.70    2.11
  -4   4   1   83.38    2.11
   4   4  -1   83.42    2.11
  -4   4   1   81.98    2.11
  -4   4   1   83.10    2.11
   4   4  -1   81.84    2.79
   4   4  -1   83.61    2.11
  -4   4   1   87.31    2.68
   2  -4  -1    2.09    0.09
  -2  -4   1    2.11    0.11
   2  -4  -1    2.08    0.08
  -2  -4   1    2.28    1.01
   2  -4  -1    2.42    0.07
   2  -4  -1    2.06    0.12
  -2  -4   1    2.15    0.11
   2  -4  -1    1.83    0.82
   2  -4  -1    2.17    0.11
  -2  -4   1    2.22    0.12
  -2  -4   1    2.19    0.10
   2  -4  -1    2.14    0.45
  -2  -4   1    1.44    0.48
   2   4  -1    2.25    0.12
   2   4  -1    2.19    0.12
   2   4  -1    1.57    0.40
   2   4  -1    2.19    0.12
  -2   4   1    1.43    0.34
  -2   4   1    2.12    0.12
   2   4  -1    2.10    0.10
  -2   4   1    1.91    0.11
  -2   4   1    2.45    0.11
  -2   4   1    2.80    0.68
   2   4  -1    2.18    0.11
   2   4  -1    1.98    0.78
  -2   4   1    2.04    0.12
   0  -4  -1  129.89    4.41
   0  -4  -1  133.01    3.80
   0  -4  -1  118.65    3.09
   0  -4  -1  118.73    3.11
   0  -4   1  119.02    3.11
   0  -4  -1  120.49    3.11
   0  -4   1  117.23    3.10
   0  -4  -1  118.03    3.09
   0  -4   1  121.74    3.76
   0  -4   1  118.64    3.10
   0  -4   1  134.13    3.10
   0  -4  -1  123.33    3.08
   0  -4   1  119.37    4.37
   0   4  -1  120.31    3.10
   0   4  -1  132.54    3.79
   0   4  -1  119.41    3.11
   0   4  -1  120.00    3.10
   0   4  -1  120.51    3.11
   0   4   1  121.19    3.10
   0   4   1  121.16    3.11
   0   4   1  118.31    3.10
   0   4   1  122.21    3.73
   0   4  -1  120.34    3.10
   0   4   1  115.76    3.10
   0   4   1  122.58    4.30
   0   4  -1  137.01    4.45
   0   4   1  120.45    3.10
  -2  -4  -1  105.55    2.77
   2  -4   1  109.70    2.78
  -2  -4  -1  107.02    4.14
   2  -4   1  105.33    2.78
   2  -4   1  107.62    2.74
  -2  -4  -1  105.82    2.76
   2  -4   1  107.37    2.77
   2  -4   1  119.24    2.76
  -2  -4  -1  108.74    3.48
  -2  -4  -1  106.87    2.77
   2  -4   1  106.28    2.75
  -2  -4  -1  103.90    2.77
   2  -4   1  108.79    3.42
  -2  -4  -1  107.08    2.76
   2  -4   1  108.39    4.01
   2  -4   1  103.98    2.74
  -2   4  -1  102.84    2.77
   2   4   1  121.18    3.52
  -2   4  -1  108.69    2.77
  -2   4  -1  107.79    2.78
   2   4   1  107.63    2.78
   2   4   1  112.08    2.77
   2   4   1  106.52    2.77
   2   4   1  120.45    4.16
   2   4   1  105.43    2.77
   2   4   1  107.98    2.77
  -2   4  -1  123.34    4.07
  -2   4  -1  105.58    2.78
  -2   4  -1  108.36    2.78
  -2   4  -1  115.30    3.42
  -2   4  -1  108.23    2.75
   4  -4   1    0.05    0.06
  -4  -4  -1    0.11    0.05
  -4  -4  -1    0.24    0.05
   4  -4   1    0.21    0.03
  -4  -4  -1   -0.04    0.46
   4  -4   1    0.13    0.02
  -4  -4  -1    0.04    0.04
  -4  -4  -1    0.11    0.04
   4  -4   1    0.14    0.06
  -4  -4  -1    1.49    1.01
   4  -4   1    0.06    0.05
  -4   4  -1    0.59    0.31
  -4   4  -1    0.09    0.06
   4   4   1    0.11    0.05
   4   4   1    1.47    0.91
   4   4   1    0.36    0.40
  -4   4  -1    0.15    0.04
   4   4   1    0.13    0.06
   4   4   1    0.07    0.04
   4   4   1    0.02    0.07
  -4   4  -1    0.12    0.06
  -4   4  -1    0.15    0.59
   4   4   1    0.10    0.05
  -6  -4  -1  181.27    5.16
   6  -4   1  166.31    4.88
  -6  -4  -1  164.57    4.24
   6  -4   1  171.70    4.25
   6  -4   1  167.24    4.23
   6  -4   1  166.70    4.26
  -6  -4  -1  162.19    4.24
  -6  -4  -1  168.08    4.23
   6  -4   1  167.07    5.49
  -6  -4  -1  180.44    6.03
   6   4   1  140.78    4.27
   6   4   1  168.22    4.25
  -6   4  -1  163.89    4.25
   6   4   1  168.09    4.25
  -6   4  -1  171.40    4.90
  -6   4  -1  168.80    4.23
   6   4   1  169.00    5.86
   6   4   1  169.67    5.10
  -6   4  -1  166.46    4.26
  -6   4  -1  172.90    5.53
  -6   4  -1  165.07    4.25
   8  -4   1   40.66    1.09
   8  -4   1   39.59    1.73
  -8  -4  -1   40.72    1.12
   8  -4   1   42.40    1.12
   8  -4   1   44.04    2.46
  -8  -4  -1   41.44    1.11
  -8  -4  -1   42.08    1.08
  -8  -4  -1   39.57    1.12
  -8   4  -1   43.51    1.76
  -8   4  -1   41.44    1.12
   8   4   1   42.33    1.11
  -8   4  -1   42.56    1.13
   8   4   1   42.63    1.07
   8   4   1   42.26    1.11
  -8   4  -1   41.77    1.12
   8   4   1   44.58    2.01
  -8   4  -1   43.88    2.35
   8   4   1   41.44    2.83
   8   4   1   40.76    1.12
  -8   4  -1   43.36    1.09
   8   4   1   40.60    1.11
 -10  -4  -1    7.55    0.29
  10  -4   1    7.20    0.93
  10  -4   1    7.30    0.28
 -10  -4  -1    7.22    0.29
 -10  -4  -1    8.08    0.21
  10  -4   1    5.61    1.25
 -10  -4  -1    7.36    0.28
  10   4   1    7.63    0.28
 -10   4  -1    7.46    1.31
 -10   4  -1    7.89    0.30
  10   4   1    7.12    1.40
  10   4   1    7.46    0.28
  10   4   1    7.56    0.27
 -10   4  -1    7.10    0.29
 -10   4  -1    7.65    0.29
 -10   4  -1    7.31    0.92
  10   4   1    8.00    1.27
  10   4   1    6.02    1.87
  10   4   1    8.09    0.20
 -10   4  -1    7.82    0.27
  10   4   1   10.13    1.98
 -12  -4  -1   45.57    1.22
  12  -4   1   45.93    1.21
 -12  -4  -1   44.85    1.22
  12  -4   1   39.18    1.97
  12   4   1   46.06    1.22
  12   4   1   45.55    1.22
  12   4   1   44.42    3.77
 -12   4  -1   45.86    2.95
  12   4   1   45.52    1.20
 -12   4  -1   45.33    1.22
 -12   4  -1   45.09    1.23
 -12   4  -1   45.21    1.23
 -12   4  -1   48.29    2.01
  12   4   1   43.70    2.38
 -12   4  -1   45.58    1.16
 -12   4  -1   46.22    1.20
 -14  -4  -1   34.41    0.97
 -14  -4  -1   35.20    0.98
  14  -4   1   35.41    0.96
  14   4   1   35.15    0.95
 -14   4  -1   34.57    0.97
  14   4   1   35.36    0.98
 -14   4  -1   33.68    0.98
 -14   4  -1   35.60    0.96
 -14   4  -1   33.87    0.98
 -16  -4  -1    3.76    0.26
 -16  -4  -1    4.35    0.27
  16  -4   1    3.85    0.26
 -16   4  -1    4.37    0.26
 -16   4  -1    4.21    0.28
  16   4   1    4.33    0.24
  16   4   1    4.30    0.27
 -16   4  -1    4.20    0.25
 -18  -4  -1   11.27    0.45
 -18  -4  -1   11.04    0.45
 -18  -4  -1   11.21    0.45
  18   4   1   11.35    0.44
 -18   4  -1   11.08    0.45
  18   4   1   11.41    0.41
 -18   4  -1   11.32    0.43
 -18   4  -1   11.06    0.44
 -18   4  -1   11.36    0.46
 -20  -4  -1    6.39    0.38
 -20  -4  -1    5.89    0.36
 -20  -4  -1    6.30    0.37
 -20   4  -1    6.44    0.36
  20   4   1    5.80    0.37
 -20   4  -1    5.76    0.38
 -20   4  -1    6.05    0.34
 -20   4  -1    5.76    0.37
 -22  -4  -1    1.78    0.22
 -22  -4  -1    2.17    0.25
 -22  -4  -1    1.87    0.22
 -22  -4  -1    1.72    0.23
 -22   4  -1    2.31    0.29
 -22   4  -1    1.88    0.22
  22   4   1    2.46    0.34
 -22   4  -1    2.21    0.33
 -22   4  -1    2.85    0.35
 -23  -5   1    1.44    0.24
 -23  -5   1    1.42    0.28
  23   5  -1    1.83    0.28
 -23   5   1    2.03    0.27
 -23   5   1    2.40    0.30
 -21  -5   1    2.48    0.32
 -21  -5   1    2.16    0.30
 -21   5   1    2.09    0.23
 -21   5   1    2.49    0.29
 -21   5   1    2.02    0.25
  21   5  -1    2.28    0.35
 -21   5   1    2.38    0.28
 -19  -5   1    9.06    0.42
  19  -5  -1    9.25    0.40
 -19  -5   1    9.38    0.42
 -19   5   1    9.25    0.43
 -19   5   1    9.27    0.39
  19   5  -1    9.12    0.42
 -19   5   1    9.48    0.43
  17  -5  -1   23.02    0.70
 -17  -5   1   24.03    0.73
 -17  -5   1   22.45    0.71
 -17   5   1   22.59    0.66
 -17   5   1   21.37    0.73
 -17   5   1   22.89    0.69
 -17   5   1   21.87    0.71
  17   5  -1   22.34    0.66
 -15  -5   1    2.27    0.24
 -15  -5   1    2.23    0.23
  15  -5  -1    2.24    0.23
 -15  -5   1    2.15    0.17
 -15   5   1    2.10    0.24
  15   5  -1    2.70    0.23
  15   5  -1    2.25    0.19
 -15   5   1    2.60    0.24
 -15   5   1    2.10    0.17
 -15   5   1    2.15    0.21
  15   5  -1    2.51    0.24
 -13  -5   1   23.18    0.70
 -13  -5   1   24.07    0.66
  13  -5  -1   23.25    0.70
 -13  -5   1   22.73    0.69
  13   5  -1   23.81    0.69
 -13   5   1   23.23    0.68
  13   5  -1   22.25    3.52
  13   5  -1   24.15    2.57
 -13   5   1   23.48    0.70
  13   5  -1   23.93    0.70
  13   5  -1   23.87    0.66
 -13   5   1   24.12    0.68
 -13   5   1   23.22    0.69
 -11  -5   1   63.56    1.66
 -11  -5   1   63.50    1.68
 -11  -5   1   61.68    1.67
 -11  -5   1   62.22    2.86
 -11  -5   1   64.45    1.64
 -11  -5   1   58.67    4.14
  11  -5  -1   62.37    1.68
  11   5  -1   63.59    1.68
  11   5  -1   65.47    1.68
 -11   5   1   64.21    2.36
 -11   5   1   61.86    1.67
 -11   5   1   66.24    3.13
  11   5  -1   66.27    4.27
 -11   5   1   64.25    1.63
  11   5  -1   64.69    1.68
  11   5  -1   68.84    2.94
 -11   5   1   62.07    1.68
 -11   5   1   63.41    1.69
  11   5  -1   65.46    1.66
 -11   5   1   60.55    1.67
   9  -5  -1    0.53    0.51
  -9  -5   1   -0.11    1.45
  -9  -5   1    0.22    0.08
  -9  -5   1   -0.12    0.67
  -9  -5   1    0.14    0.08
  -9  -5   1    0.08    0.08
   9  -5  -1    0.86    1.09
   9  -5  -1    0.28    0.10
  -9  -5   1    0.22    0.05
  -9   5   1    0.17    0.04
  -9   5   1    0.05    0.10
   9   5  -1    0.07    0.08
  -9   5   1    0.13    0.08
  -9   5   1   -1.05    0.98
  -9   5   1    0.20    0.09
  -9   5   1    0.10    0.09
   9   5  -1    0.42    0.72
   9   5  -1    0.02    0.09
  -9   5   1    0.07    0.08
  -9   5   1    0.77    0.50
   9   5  -1   -1.28    1.52
   9   5  -1    0.04    0.07
   9   5  -1   -0.09    0.09
  -7  -5   1   39.42    1.05
   7  -5  -1   43.51    1.01
  -7  -5   1   39.71    2.32
   7  -5  -1   40.21    1.06
  -7  -5   1   40.08    1.04
   7  -5  -1   37.44    1.71
  -7  -5   1   34.50    3.24
   7  -5  -1   39.66    0.99
   7  -5  -1   33.38    2.36
  -7  -5   1   39.23    1.05
  -7   5   1   38.90    1.05
  -7   5   1   39.69    1.05
  -7   5   1   39.86    1.00
  -7   5   1   37.34    2.40
   7   5  -1   38.16    1.95
   7   5  -1   39.70    1.05
  -7   5   1   36.72    1.68
  -7   5   1   40.01    1.05
   7   5  -1   37.43    1.05
  -7   5   1   38.82    1.06
   7   5  -1   40.14    1.05
   7   5  -1   40.54    1.04
   7   5  -1   41.04    2.90
  -5  -5   1   21.66    0.61
   5  -5  -1   21.95    0.61
   5  -5  -1   23.17    0.56
  -5  -5   1   21.67    0.60
   5  -5  -1   22.28    0.57
  -5  -5   1   21.98    1.58
   5  -5  -1   21.00    0.62
   5  -5  -1   21.26    1.25
   5  -5  -1   20.62    1.89
  -5  -5   1   21.83    0.60
  -5  -5   1   18.35    2.55
   5   5  -1   22.42    0.61
   5   5  -1   21.92    0.59
   5   5  -1   20.65    0.61
   5   5  -1   21.73    0.62
  -5   5   1   23.66    1.91
   5   5  -1   20.89    2.27
  -5   5   1   22.40    0.61
  -5   5   1   21.89    0.62
   5   5  -1   20.91    1.42
  -5   5   1   21.23    1.23
   5   5  -1   22.19    0.60
  -5   5   1   21.40    0.61
  -5   5   1   21.85    0.61
   3  -5  -1    0.21    0.07
   3  -5  -1    0.22    0.44
  -3  -5   1    0.13    1.24
   3  -5  -1    0.82    1.01
   3  -5  -1    0.24    0.03
   3  -5  -1    0.17    0.07
  -3  -5   1    0.38    0.63
   3  -5  -1    0.24    0.04
  -3  -5   1    0.18    0.07
  -3  -5   1    0.14    0.08
   3  -5  -1    0.21    0.03
  -3  -5   1    0.25    0.05
  -3   5   1    0.09    0.06
   3   5  -1   -0.49    0.42
  -3   5   1   -0.67    0.73
   3   5  -1    0.20    0.07
  -3   5   1    0.17    0.05
  -3   5   1    0.08    0.06
   3   5  -1    0.19    0.09
  -3   5   1    0.23    0.08
  -3   5   1    0.18    0.07
   3   5  -1    0.19    0.08
  -3   5   1    0.10    0.33
   3   5  -1    0.10    0.07
   3   5  -1    0.02    1.00
   3   5  -1    0.28    0.06
   1  -5  -1    6.85    1.43
  -1  -5   1    7.01    1.08
  -1  -5   1    6.86    0.21
  -1  -5   1    5.04    1.42
   1  -5  -1    6.77    0.20
   1  -5  -1    5.90    1.00
   1  -5  -1    6.94    0.19
   1  -5  -1    6.98    0.25
  -1  -5   1    6.90    0.24
  -1  -5   1    6.79    0.24
  -1  -5   1    6.63    0.21
   1  -5  -1    6.65    0.24
   1  -5  -1    7.01    0.21
  -1   5   1    6.18    1.15
  -1   5   1    6.84    0.82
   1   5  -1    6.92    1.36
  -1   5   1    6.89    0.24
  -1   5   1    6.94    0.24
  -1   5   1    6.89    0.24
  -1   5   1    6.96    0.26
  -1   5   1    6.90    0.22
   1   5  -1    6.70    0.23
   1   5  -1    6.87    0.24
   1   5  -1    6.84    0.24
   1   5  -1    6.70    0.26
   1   5  -1    6.64    0.25
   1   5  -1    6.29    0.91
  -1  -5  -1   12.67    0.33
   1  -5   1   12.26    1.83
   1  -5   1   11.58    0.33
   1  -5   1    9.95    1.18
  -1  -5  -1   11.22    0.36
   1  -5   1   11.38    0.33
  -1  -5  -1    9.36    1.65
  -1  -5  -1   11.24    0.34
   1  -5   1   11.57    0.38
  -1  -5  -1   11.46    0.34
   1  -5   1   11.59    0.36
  -1  -5  -1   11.15    1.21
   1  -5   1   11.19    0.37
  -1   5  -1   12.57    0.37
  -1   5  -1   10.38    1.44
  -1   5  -1   12.82    0.36
   1   5   1   12.14    0.36
  -1   5  -1   12.52    0.37
   1   5   1   12.18    0.37
   1   5   1   12.87    0.37
   1   5   1   13.52    1.82
  -1   5  -1   12.29    0.37
   1   5   1   12.52    0.35
   1   5   1   11.47    1.06
  -1   5  -1   12.10    1.03
   1   5   1   12.52    0.37
  -3  -5  -1   36.11    1.88
  -3  -5  -1   36.07    0.91
   3  -5   1   35.56    0.95
   3  -5   1   34.58    2.58
   3  -5   1   34.58    1.74
  -3  -5  -1   35.25    0.92
  -3  -5  -1   34.21    2.84
  -3  -5  -1   35.10    0.93
   3  -5   1   36.70    0.89
   3  -5   1   37.06    0.94
   3  -5   1   36.45    0.89
  -3  -5  -1   35.50    0.94
   3  -5   1   34.95    0.89
   3  -5   1   36.01    0.89
   3  -5   1   35.31    0.93
   3   5   1   33.73    0.94
  -3   5  -1   33.52    0.94
  -3   5  -1   34.02    1.66
  -3   5  -1   34.77    0.94
   3   5   1   31.73    2.51
   3   5   1   33.56    1.75
  -3   5  -1   33.37    0.94
  -3   5  -1   33.69    0.94
  -3   5  -1   33.47    0.93
   3   5   1   35.03    0.93
  -3   5  -1   35.28    0.90
   3   5   1   33.92    0.93
  -3   5  -1   34.12    2.35
   3   5   1   35.04    0.93
   3   5   1   33.83    0.93
   5  -5   1   18.77    0.56
  -5  -5  -1   18.13    1.53
  -5  -5  -1   19.22    0.54
  -5  -5  -1   18.54    0.54
  -5  -5  -1   19.48    0.53
   5  -5   1   19.85    0.54
  -5  -5  -1   20.05    2.69
  -5  -5  -1   18.95    0.54
  -5  -5  -1   19.49    0.52
  -5   5  -1   15.81    2.70
  -5   5  -1   18.72    0.54
   5   5   1   19.33    0.55
   5   5   1   17.66    1.58
   5   5   1   19.27    0.54
  -5   5  -1   19.77    0.51
  -5   5  -1   18.72    0.55
   5   5   1   18.96    0.55
  -5   5  -1   16.45    1.51
   5   5   1   18.78    0.54
  -5   5  -1   18.44    0.55
   5   5   1   19.06    0.54
   5   5   1   16.84    2.61
  -7  -5  -1   55.16    1.43
   7  -5   1   56.59    1.46
   7  -5   1   56.52    1.43
  -7  -5  -1   54.86    1.42
  -7  -5  -1   55.44    1.44
  -7  -5  -1   55.69    1.44
  -7  -5  -1   53.66    3.53
   7  -5   1   55.51    3.06
  -7  -5  -1   54.74    1.44
   7  -5   1   55.43    2.24
   7   5   1   53.47    1.44
  -7   5  -1   53.96    3.01
  -7   5  -1   55.29    1.41
  -7   5  -1   53.46    1.45
   7   5   1   51.81    3.49
   7   5   1   50.36    2.42
  -7   5  -1   59.61    2.27
   7   5   1   54.70    1.44
   7   5   1   54.47    1.44
   7   5   1   54.67    1.45
  -7   5  -1   52.74    1.44
   9  -5   1   45.92    2.22
   9  -5   1   50.18    3.25
  -9  -5  -1   54.77    1.45
  -9  -5  -1   55.95    1.45
   9  -5   1   54.48    1.44
   9  -5   1   53.80    1.47
  -9  -5  -1   55.98    1.42
  -9  -5  -1   55.14    1.47
   9   5   1   58.28    2.68
  -9   5  -1   55.64    1.47
  -9   5  -1   56.20    2.34
   9   5   1   55.64    1.47
  -9   5  -1   55.86    1.47
  -9   5  -1   57.23    3.23
  -9   5  -1   54.76    1.48
  -9   5  -1   57.11    1.43
   9   5   1   55.89    1.46
   9   5   1   56.15    1.45
   9   5   1   59.61    3.90
   9   5   1   56.44    1.46
 -11  -5  -1   17.50    0.55
 -11  -5  -1   17.75    0.54
  11  -5   1   18.04    0.55
 -11  -5  -1   17.86    0.52
  11   5   1   18.19    0.54
  11   5   1   17.23    0.54
 -11   5  -1   17.51    0.56
  11   5   1   18.21    1.92
  11   5   1   19.31    2.89
  11   5   1   17.15    0.55
 -11   5  -1   17.85    0.51
 -11   5  -1   17.74    0.55
 -11   5  -1   17.40    0.55
 -13  -5  -1   26.10    0.77
  13  -5   1   26.19    0.77
 -13  -5  -1   27.53    0.77
 -13  -5  -1   26.76    0.78
  13   5   1   26.83    0.78
 -13   5  -1   25.91    0.78
 -13   5  -1   25.94    0.77
 -13   5  -1   26.49    0.74
  13   5   1   26.47    0.75
 -13   5  -1   25.97    0.79
  13   5   1   26.66    0.77
 -15  -5  -1   32.63    0.91
  15  -5   1   33.06    0.91
 -15  -5  -1   29.16    1.03
 -15  -5  -1   30.66    0.98
 -15   5  -1   31.51    0.93
  15   5   1   32.50    0.89
 -15   5  -1   32.35    0.88
 -15   5  -1   28.20    1.03
  15   5   1   32.21    0.91
 -15   5  -1   32.39    0.92
 -17  -5  -1    8.47    0.40
  17  -5   1    8.77    0.39
 -17  -5  -1    8.81    0.39
 -17  -5  -1    8.99    0.40
 -17   5  -1    8.28    0.41
  17   5   1    8.72    0.39
  17   5   1    8.82    0.36
 -17   5  -1    9.24    0.41
 -17   5  -1    8.31    0.38
 -17   5  -1    9.02    0.36
 -19  -5  -1    6.74    0.39
 -19  -5  -1    7.27    0.39
 -19  -5  -1    7.01    0.40
  19   5   1    7.65    0.39
 -19   5  -1    7.12    0.41
 -19   5  -1    7.50    0.42
 -19   5  -1    7.22    0.38
 -21  -5  -1    6.61    0.41
 -21  -5  -1    7.03    0.40
 -21  -5  -1    7.28    0.44
 -21   5  -1    6.98    0.41
  21   5   1    8.28    0.43
 -21   5  -1    7.84    0.43
 -21   5  -1    6.59    0.61
 -22   6   1    4.44    0.31
 -22   6   1    4.48    0.30
 -20  -6   1    3.06    0.35
 -20  -6   1    2.78    0.35
 -20  -6   1    3.61    0.35
 -20   6   1    3.54    0.38
 -20   6   1    2.70    0.34
  20   6  -1    2.64    0.32
 -20   6   1    3.10    0.34
 -20   6   1    3.57    0.30
  18  -6  -1    1.24    0.19
 -18  -6   1    1.39    0.20
 -18  -6   1    1.10    0.18
 -18   6   1    1.06    0.18
 -18   6   1    1.27    0.21
 -18   6   1    1.39    0.17
 -18   6   1    1.46    0.21
  18   6  -1    1.48    0.19
 -18   6   1    1.88    0.24
  16  -6  -1   11.60    0.47
 -16  -6   1   11.50    0.39
 -16  -6   1   11.23    0.45
  16   6  -1   12.05    0.46
 -16   6   1   11.51    0.43
  16   6  -1   11.46    0.45
 -16   6   1   11.51    0.47
  16   6  -1   11.10    0.41
 -16   6   1   11.33    0.42
 -16   6   1   11.38    0.46
 -16   6   1   11.22    0.45
 -14  -6   1    0.77    0.14
  14  -6  -1    0.82    0.15
 -14  -6   1    0.93    0.15
 -14  -6   1    1.27    0.18
 -14   6   1    0.96    0.14
 -14   6   1    0.89    0.16
  14   6  -1    1.03    0.15
 -14   6   1    0.99    0.15
 -14   6   1    0.88    0.21
 -14   6   1    0.56    0.14
  14   6  -1    0.89    0.13
  14   6  -1    0.95    0.15
 -12  -6   1   35.19    1.00
  12  -6  -1   34.27    1.01
 -12  -6   1   37.16    0.99
 -12  -6   1   36.20    0.98
 -12  -6   1   36.88    0.97
 -12   6   1   35.89    0.99
  12   6  -1   35.15    1.00
 -12   6   1   34.77    0.99
 -12   6   1   35.08    1.00
  12   6  -1   35.42    1.00
  12   6  -1   35.56    0.97
  12   6  -1   35.43    1.00
 -12   6   1   34.50    1.01
 -10  -6   1    3.91    0.24
  10  -6  -1    4.07    0.25
 -10  -6   1    4.05    0.22
 -10  -6   1    1.10    2.53
 -10  -6   1    4.02    0.22
 -10  -6   1    4.08    0.19
 -10   6   1    4.38    0.26
  10   6  -1    6.69    2.54
 -10   6   1    4.45    0.24
  10   6  -1    4.21    0.25
  10   6  -1    4.29    0.22
 -10   6   1    4.57    0.25
 -10   6   1    4.64    0.25
  10   6  -1    4.60    0.24
  10   6  -1    3.78    1.15
  10   6  -1    4.42    0.25
  -8  -6   1   34.18    2.30
   8  -6  -1   31.24    0.90
  -8  -6   1   32.60    0.87
  -8  -6   1   32.45    0.88
  -8  -6   1   30.80    0.88
  -8  -6   1   32.28    0.87
   8   6  -1   31.99    0.89
   8   6  -1   29.42    2.16
  -8   6   1   31.70    0.88
   8   6  -1   28.44    3.59
   8   6  -1   32.50    0.87
  -8   6   1   33.00    0.90
   8   6  -1   31.97    0.89
   8   6  -1   31.20    0.89
  -8   6   1   31.55    0.90
  -8   6   1   31.58    1.81
  -8   6   1   31.27    0.88
  -8   6   1   30.11    2.87
  -6  -6   1   31.04    0.84
   6  -6  -1   27.35    2.69
  -6  -6   1   31.68    0.83
   6  -6  -1   29.78    0.85
  -6  -6   1   34.93    3.80
   6  -6  -1   31.48    0.78
   6  -6  -1   31.27    0.84
  -6  -6   1   32.07    0.84
   6  -6  -1   24.85    1.63
  -6  -6   1   32.26    2.21
  -6   6   1   29.76    0.84
   6   6  -1   27.06    3.21
   6   6  -1   30.45    0.84
  -6   6   1   29.82    0.84
  -6   6   1   30.52    1.79
  -6   6   1   30.82    0.83
   6   6  -1   30.30    0.85
   6   6  -1   30.69    0.83
  -6   6   1   30.22    0.84
  -6   6   1   30.42    2.88
   6   6  -1   30.02    0.84
   6   6  -1   27.81    1.96
   6   6  -1   30.22    0.82
  -6   6   1   29.99    0.85
   4  -6  -1   14.77    0.48
  -4  -6   1   14.88    2.50
   4  -6  -1   14.67    2.55
  -4  -6   1   15.08    0.47
   4  -6  -1   14.81    0.46
  -4  -6   1   14.74    0.47
   4  -6  -1   15.18    1.59
  -4  -6   1   15.29    0.45
  -4  -6   1   15.84    1.77
   4  -6  -1   15.25    0.42
  -4   6   1   11.39    1.96
  -4   6   1   15.60    0.47
   4   6  -1   15.60    0.46
   4   6  -1   15.93    1.47
  -4   6   1   16.17    0.46
  -4   6   1   14.90    1.20
   4   6  -1   15.97    0.48
  -4   6   1   15.53    0.47
   4   6  -1   15.47    0.45
   4   6  -1   15.47    0.47
   4   6  -1   14.51    2.49
   4   6  -1   15.43    0.48
  -4   6   1   15.49    0.47
  -4   6   1   15.32    0.48
   2  -6  -1    2.27    0.09
  -2  -6   1    2.35    0.12
  -2  -6   1    1.42    1.82
  -2  -6   1    2.10    0.17
  -2  -6   1    2.24    0.17
   2  -6  -1    2.26    0.11
  -2  -6   1    2.46    0.94
  -2  -6   1    2.11    0.12
   2  -6  -1    3.79    1.76
   2  -6  -1    2.17    0.83
   2  -6  -1    2.21    0.18
   2  -6  -1    2.13    0.17
  -2   6   1    2.20    0.18
  -2   6   1    2.36    0.17
   2   6  -1    2.14    0.16
   2   6  -1    2.24    0.17
   2   6  -1    2.24    0.18
   2   6  -1    1.42    0.73
   2   6  -1    0.34    1.37
  -2   6   1    2.07    0.17
   2   6  -1    2.19    0.16
  -2   6   1    2.11    0.17
  -2   6   1    2.16    0.17
  -2   6   1    0.14    1.16
  -2   6   1    2.50    0.67
   2   6  -1    2.22    0.18
   0  -6  -1   14.23    0.42
   0  -6  -1   14.50    0.46
   0  -6  -1   14.83    0.39
   0  -6   1   12.42    2.36
   0  -6  -1   14.22    1.61
   0  -6   1   14.15    0.46
   0  -6   1   14.36    0.41
   0  -6  -1   13.89    2.24
   0  -6  -1   14.47    0.45
   0  -6   1   14.62    0.40
   0  -6   1   13.72    1.64
   0  -6   1   14.11    0.45
   0  -6  -1   14.28    0.41
   0   6  -1   16.80    2.52
   0   6   1   15.00    0.45
   0   6  -1   14.64    0.46
   0   6   1   14.79    0.45
   0   6   1   16.47    1.37
   0   6   1   14.59    0.45
   0   6  -1   14.80    0.45
   0   6   1   14.63    0.45
   0   6  -1   14.93    0.45
   0   6   1   15.27    2.34
   0   6  -1   15.19    0.45
   0   6  -1   15.50    1.40
   0   6   1   14.40    0.45
   0   6  -1   15.54    0.44
  -2  -6  -1   23.32    0.68
   2  -6   1   24.45    0.62
  -2  -6  -1   22.48    3.31
   2  -6   1   24.38    0.70
  -2  -6  -1   24.17    0.65
  -2  -6  -1   23.73    0.68
  -2  -6  -1   23.64    0.63
   2  -6   1   23.52    0.68
   2  -6   1   20.60    1.75
   2  -6   1   23.85    0.63
  -2  -6  -1   23.60    1.94
  -2  -6  -1   23.68    0.66
   2  -6   1   21.30    3.07
  -2   6  -1   24.97    0.68
   2   6   1   24.19    0.68
  -2   6  -1   23.99    0.68
  -2   6  -1   22.36    2.60
   2   6   1   24.21    0.68
  -2   6  -1   24.59    0.69
   2   6   1   23.32    1.66
  -2   6  -1   24.64    0.68
   2   6   1   24.08    0.67
   2   6   1   25.01    0.67
   2   6   1   24.81    0.68
   2   6   1   22.17    2.81
  -2   6  -1   22.85    1.56
  -2   6  -1   24.02    0.68
   4  -6   1   11.59    2.07
   4  -6   1   11.59    1.46
  -4  -6  -1   11.51    0.36
   4  -6   1   11.89    0.38
  -4  -6  -1   12.06    1.70
  -4  -6  -1   11.28    0.38
  -4  -6  -1   11.97    0.34
   4  -6   1   11.10    0.39
  -4  -6  -1   16.14    2.56
  -4  -6  -1   11.58    0.37
  -4  -6  -1   11.53    0.37
  -4   6  -1    9.50    1.52
  -4   6  -1   11.73    0.38
  -4   6  -1   11.56    0.39
  -4   6  -1   11.63    0.38
   4   6   1   11.96    1.44
   4   6   1   10.96    1.93
   4   6   1   11.66    0.38
  -4   6  -1   13.40    1.17
   4   6   1   11.68    0.37
  -4   6  -1   11.63    0.39
  -4   6  -1   11.11    0.38
   4   6   1   11.01    0.38
   4   6   1   11.69    0.38
   4   6   1   11.58    0.38
   6  -6   1   34.23    0.93
  -6  -6  -1   28.52    4.02
  -6  -6  -1   34.58    2.32
  -6  -6  -1   34.01    0.92
  -6  -6  -1   33.37    0.92
  -6  -6  -1   33.62    0.93
   6  -6   1   31.28    0.97
  -6  -6  -1   33.61    0.94
  -6  -6  -1   32.90    0.93
   6   6   1   35.81    2.20
  -6   6  -1   34.87    0.95
  -6   6  -1   36.39    1.91
  -6   6  -1   35.08    0.95
  -6   6  -1   34.96    0.89
   6   6   1   34.21    0.95
   6   6   1   33.99    0.93
   6   6   1   34.64    0.93
   6   6   1   36.94    3.69
  -6   6  -1   34.02    0.95
   6   6   1   35.40    0.94
  -6   6  -1   34.46    0.94
  -6   6  -1   32.55    2.86
  -8  -6  -1   40.72    1.11
  -8  -6  -1   41.89    2.67
  -8  -6  -1   41.44    1.10
  -8  -6  -1   40.42    1.11
   8  -6   1   39.73    1.13
  -8  -6  -1   41.30    1.12
  -8  -6  -1   42.55    4.47
  -8  -6  -1   40.31    1.12
   8  -6   1   42.46    1.10
  -8   6  -1   41.26    1.07
   8   6   1   39.89    1.13
  -8   6  -1   41.92    1.14
  -8   6  -1   40.10    1.13
  -8   6  -1   41.15    1.13
   8   6   1   41.71    4.19
   8   6   1   42.51    1.12
  -8   6  -1   40.49    1.12
   8   6   1   42.05    1.11
   8   6   1   42.19    2.61
   8   6   1   41.50    1.12
 -10  -6  -1    2.18    0.22
 -10  -6  -1    2.00    0.21
 -10  -6  -1    2.13    0.20
  10  -6   1    2.26    0.22
 -10  -6  -1    2.15    0.18
 -10  -6  -1    2.22    0.10
 -10   6  -1    1.99    0.22
 -10   6  -1    1.60    0.21
  10   6   1    3.29    2.56
  10   6   1    1.76    0.20
 -10   6  -1    1.61    0.20
  10   6   1    1.96    0.21
  10   6   1    1.16    1.22
 -10   6  -1    1.62    0.21
  10   6   1    1.91    0.20
  10   6   1    1.84    0.19
 -12  -6  -1   29.91    0.88
 -12  -6  -1   30.07    0.86
  12  -6   1   29.95    0.88
 -12  -6  -1   30.54    0.88
 -12   6  -1   28.66    0.87
 -12   6  -1   30.99    0.83
  12   6   1   31.73    0.87
  12   6   1   30.10    0.88
 -12   6  -1   29.78    0.88
 -12   6  -1   29.83    0.87
  12   6   1   30.93    0.86
 -14  -6  -1   12.61    0.45
  14  -6   1   12.44    0.46
 -14  -6  -1   12.30    0.46
 -14  -6  -1   13.01    0.47
 -14   6  -1   11.81    0.45
  14   6   1   12.25    0.44
 -14   6  -1   11.89    0.47
  14   6   1   11.54    0.47
  14   6   1   12.22    0.45
  16  -6   1    2.89    0.31
 -16  -6  -1    2.29    0.28
 -16  -6  -1    2.95    0.29
 -16  -6  -1    2.68    0.29
  16   6   1    2.71    0.37
 -16   6  -1    2.77    0.29
  16   6   1    2.75    0.28
 -16   6  -1    2.54    0.27
 -16   6  -1    2.27    0.24
 -18  -6  -1    2.08    0.31
 -18  -6  -1    1.89    0.22
 -18  -6  -1    1.93    0.22
  18  -6   1    1.71    0.22
 -18   6  -1    2.16    0.31
  18   6   1    2.18    0.30
 -18   6  -1    1.77    0.20
 -18   6  -1    1.22    0.21
 -20  -6  -1    4.15    0.46
 -20  -6  -1    3.97    0.38
 -20   6  -1    3.65    0.33
 -20   6  -1    3.02    0.31
  20   6   1    3.61    0.34
 -20   6  -1    3.39    0.41
  19  -7  -1    2.76    0.37
 -19  -7   1    2.61    0.35
 -19  -7   1    2.86    0.36
 -19  -7   1    2.12    0.23
 -19   7   1    2.42    0.31
 -19   7   1    2.48    0.36
 -19   7   1    2.25    0.32
  19   7  -1    2.05    0.24
 -19   7   1    2.52    0.34
 -17  -7   1   18.42    0.67
 -17  -7   1   18.61    0.67
  17  -7  -1   19.14    0.67
 -17  -7   1   18.85    0.66
  17   7  -1   19.89    0.67
 -17   7   1   19.64    0.67
 -17   7   1   19.28    0.64
 -17   7   1   19.96    0.66
  17   7  -1   19.70    0.67
 -17   7   1   19.17    0.69
 -15  -7   1    0.77    0.17
 -15  -7   1    0.61    0.16
 -15  -7   1    0.59    0.18
  15  -7  -1    0.44    0.17
 -15  -7   1    0.58    0.16
 -15   7   1    0.66    0.15
  15   7  -1    0.78    0.17
 -15   7   1    0.73    0.16
  15   7  -1    0.83    0.15
 -15   7   1    0.84    0.17
  15   7  -1    0.79    0.16
 -15   7   1    0.71    0.19
 -13  -7   1   11.79    0.46
 -13  -7   1   11.66    0.42
  13  -7  -1   11.66    0.47
 -13  -7   1   11.55    0.44
  13   7  -1   12.10    0.46
  13   7  -1   12.42    0.43
 -13   7   1   12.37    0.46
 -13   7   1   12.03    0.48
 -13   7   1   11.57    0.45
 -13   7   1   12.49    0.44
 -11  -7   1   11.07    0.40
 -11  -7   1   10.68    0.40
  11  -7  -1   10.54    0.44
 -11  -7   1   10.86    0.42
 -11  -7   1   11.27    0.38
 -11  -7   1   10.86    0.42
 -11   7   1   11.76    0.42
  11   7  -1   11.36    0.43
 -11   7   1   11.54    0.42
  11   7  -1   12.06    0.44
  11   7  -1   11.74    0.42
  11   7  -1   11.35    0.41
 -11   7   1   11.14    0.46
 -11   7   1   12.03    0.43
   9  -7  -1   11.24    0.44
  -9  -7   1   11.81    0.42
  -9  -7   1   11.36    0.41
  -9  -7   1   11.89    0.42
  -9  -7   1   11.88    0.40
  -9  -7   1   11.65    0.39
   9   7  -1   12.10    0.41
   9   7  -1   13.17    1.86
   9   7  -1   12.21    0.44
   9   7  -1   11.72    0.42
  -9   7   1   11.94    0.42
   9   7  -1   11.99    0.42
  -9   7   1   11.79    0.42
   9   7  -1   15.67    3.49
  -9   7   1   12.21    0.41
  -9   7   1   11.87    0.45
  -9   7   1   11.49    0.42
  -7  -7   1    7.62    0.32
  -7  -7   1    6.21    1.59
  -7  -7   1    9.42    3.83
  -7  -7   1    8.35    0.32
  -7  -7   1    7.84    0.32
  -7  -7   1    7.72    0.32
   7  -7  -1    7.68    0.34
  -7  -7   1    8.28    0.30
   7   7  -1   12.50    2.14
   7   7  -1    7.98    0.32
   7   7  -1    8.19    0.32
  -7   7   1    7.94    0.33
  -7   7   1    8.09    0.33
  -7   7   1    8.38    0.34
   7   7  -1    8.04    0.34
   7   7  -1   10.40    2.98
  -7   7   1    7.87    0.35
  -7   7   1    8.19    0.31
   7   7  -1    8.24    0.34
  -5  -7   1   17.26    0.51
  -5  -7   1   24.51    3.43
   5  -7  -1   16.43    0.52
  -5  -7   1   16.59    0.52
   5  -7  -1   16.46    0.54
  -5  -7   1   16.16    0.52
  -5  -7   1   17.06    0.50
  -5  -7   1   15.71    4.71
   5   7  -1   16.73    0.50
  -5   7   1   16.93    0.53
   5   7  -1   16.49    0.53
   5   7  -1    9.96    2.40
  -5   7   1   16.86    0.54
   5   7  -1   16.98    0.52
  -5   7   1   17.37    0.51
   5   7  -1   16.68    0.53
  -5   7   1   16.56    0.52
  -5   7   1   16.57    0.53
   5   7  -1   17.38    0.52
   5   7  -1   16.72    1.91
  -3  -7   1    9.65    0.35
  -3  -7   1    9.30    0.34
   3  -7  -1    9.07    0.34
   3  -7  -1    9.19    0.36
  -3  -7   1    9.51    0.31
   3  -7  -1    9.43    0.27
  -3  -7   1    9.52    0.31
   3   7  -1    7.95    1.51
   3   7  -1    9.35    0.35
  -3   7   1    8.91    0.32
  -3   7   1    8.77    0.34
   3   7  -1    8.58    0.33
  -3   7   1    9.18    0.35
  -3   7   1    9.12    0.35
   3   7  -1    9.06    0.33
   3   7  -1   12.25    2.37
   3   7  -1    8.88    0.32
   3   7  -1    8.71    0.34
  -3   7   1    8.45    0.34
  -1  -7   1    0.52    0.06
  -1  -7   1    0.63    0.12
   1  -7  -1    0.37    0.11
  -1  -7   1    0.45    0.11
   1  -7  -1    0.52    0.08
   1  -7  -1    0.49    0.09
   1  -7  -1    0.60    0.11
   1   7  -1    0.47    0.13
   1   7  -1    0.52    0.12
   1   7  -1    0.52    0.11
   1   7  -1    2.76    2.93
  -1   7   1    0.55    0.12
  -1   7   1    0.64    0.12
   1   7  -1    0.75    1.04
   1   7  -1    0.55    0.11
  -1   7   1    0.45    0.12
   1   7  -1    0.55    0.11
  -1   7   1    0.46    0.09
  -1   7   1    0.50    0.11
  -1  -7  -1    4.73    0.25
   1  -7   1    4.89    0.17
   1  -7   1    4.88    0.24
   1  -7   1    4.73    0.26
  -1  -7  -1    4.89    0.18
  -1  -7  -1    4.57    0.21
  -1  -7  -1    4.66    0.25
  -1   7  -1    5.15    0.26
   1   7   1    4.74    0.22
   1   7   1    4.66    0.25
  -1   7  -1    4.81    0.24
   1   7   1    4.86    0.25
  -1   7  -1    5.16    0.24
  -1   7  -1    4.93    0.25
  -1   7  -1    5.34    0.25
   1   7   1    4.56    0.24
   1   7   1    4.70    0.25
  -3  -7  -1   15.97    0.48
  -3  -7  -1   15.60    0.49
   3  -7   1   15.15    0.50
  -3  -7  -1   15.34    0.50
  -3  -7  -1   15.65    0.44
   3  -7   1   15.66    0.52
  -3  -7  -1   15.47    0.47
  -3   7  -1   15.59    0.49
  -3   7  -1   16.22    0.50
  -3   7  -1   15.86    0.51
   3   7   1   16.17    0.48
   3   7   1   15.76    0.50
   3   7   1   16.15    0.51
   3   7   1   16.31    0.50
  -3   7  -1   15.91    0.51
   3   7   1   15.95    0.50
  -3   7  -1   15.58    0.50
  -5  -7  -1    1.40    0.17
  -5  -7  -1    1.49    0.18
  -5  -7  -1    1.34    0.20
   5  -7   1    1.37    0.21
   5  -7   1    1.06    0.13
  -5  -7  -1    1.32    0.19
   5   7   1    1.27    0.15
  -5   7  -1    1.68    0.19
  -5   7  -1    1.53    0.21
   5   7   1    1.14    0.14
   5   7   1    1.73    0.17
  -5   7  -1    1.52    0.19
   5   7   1    1.35    0.19
  -5   7  -1    1.56    0.21
   5   7   1    1.38    0.19
  -5   7  -1    1.56    0.20
   7  -7   1   19.71    0.59
  -7  -7  -1   19.29    0.59
  -7  -7  -1   19.63    0.56
  -7  -7  -1   19.64    0.57
   7  -7   1   19.44    0.62
  -7  -7  -1   19.11    0.59
  -7  -7  -1   18.95    0.59
   7   7   1   19.41    0.61
  -7   7  -1   19.98    0.62
  -7   7  -1   19.64    0.60
   7   7   1   19.65    0.59
   7   7   1   19.19    0.59
   7   7   1   19.68    0.60
  -7   7  -1   18.60    0.60
  -7   7  -1   19.13    0.61
  -7   7  -1   19.05    0.60
  -9  -7  -1   20.96    0.64
  -9  -7  -1   21.22    0.63
  -9  -7  -1   20.45    0.64
   9  -7   1   20.76    0.67
  -9  -7  -1   21.12    0.61
  -9  -7  -1   20.72    0.65
  -9   7  -1   21.01    0.67
  -9   7  -1   21.54    0.66
  -9   7  -1   20.91    0.66
  -9   7  -1   21.54    0.66
   9   7   1   21.42    0.66
   9   7   1   21.27    0.64
   9   7   1   21.21    0.65
   9   7   1   21.45    0.64
 -11  -7  -1   17.42    0.56
 -11  -7  -1   17.27    0.54
  11   7   1   17.32    0.55
 -11   7  -1   16.70    0.58
 -11   7  -1   16.65    0.74
  11   7   1   17.01    0.57
 -11   7  -1   16.51    0.56
  11   7   1   16.71    0.54
 -11   7  -1   16.05    0.57
 -13  -7  -1   25.07    0.79
 -13  -7  -1   26.65    0.80
 -13  -7  -1   25.23    0.78
  13  -7   1   25.95    0.81
  13   7   1   25.82    0.79
 -13   7  -1   25.41    0.78
  13   7   1   26.20    0.80
 -13   7  -1   25.55    0.79
 -13   7  -1   27.12    0.82
 -13   7  -1   25.21    0.80
 -15  -7  -1   13.03    0.52
 -15  -7  -1   13.64    0.52
  15  -7   1   13.27    0.54
 -15  -7  -1   13.46    0.54
 -15   7  -1   14.04    0.51
  15   7   1   13.55    0.50
 -15   7  -1   13.20    0.52
  15   7   1   13.68    0.51
 -15   7  -1   13.71    0.53
  15   7   1   13.19    0.53
 -15   7  -1   13.64    0.56
 -17  -7  -1    1.51    0.22
 -17  -7  -1    1.76    0.23
  17  -7   1    2.04    0.24
 -17  -7  -1    1.77    0.22
 -17   7  -1    1.47    0.20
 -17   7  -1    2.07    0.22
 -17   7  -1    1.49    0.25
  17   7   1    1.47    0.20
 -17   7  -1    1.54    0.22
 -19  -7  -1    3.94    0.37
  19   7   1    4.12    0.47
  18  -8  -1   11.88    0.57
  18   8  -1   13.35    0.65
 -16  -8   1   11.03    0.52
 -16  -8   1   12.29    0.52
  16  -8  -1   11.14    0.54
 -16   8   1   12.15    0.49
  16   8  -1   12.38    0.52
 -16   8   1   11.91    0.52
  16   8  -1   12.18    0.51
 -16   8   1   11.72    0.56
 -16   8   1   11.89    0.50
 -14  -8   1    0.82    0.18
 -14  -8   1    0.65    0.16
 -14  -8   1    0.90    0.22
 -14  -8   1    0.71    0.18
  14  -8  -1    0.63    0.20
 -14   8   1    0.64    0.16
 -14   8   1    0.62    0.17
  14   8  -1    0.61    0.19
  14   8  -1    0.72    0.17
 -14   8   1    0.58    0.18
 -14   8   1    0.57    0.17
  14   8  -1    0.43    0.16
 -14   8   1    0.97    0.22
 -12  -8   1   36.20    1.05
 -12  -8   1   37.59    1.04
 -12  -8   1   36.68    1.05
  12  -8  -1   37.04    1.08
 -12  -8   1   37.04    1.04
  12   8  -1   36.74    1.06
 -12   8   1   36.18    1.05
  12   8  -1   33.69    1.06
  12   8  -1   37.42    1.06
 -12   8   1   36.66    1.05
 -12   8   1   36.39    1.08
  12   8  -1   37.48    1.05
 -12   8   1   32.74    1.13
 -12   8   1   36.12    1.06
  10  -8  -1   12.72    0.51
 -10  -8   1   12.80    0.47
 -10  -8   1   13.18    0.48
 -10  -8   1   13.76    0.51
  10   8  -1   13.31    0.47
 -10   8   1   13.71    0.48
 -10   8   1   13.26    0.52
  10   8  -1   12.95    0.49
  10   8  -1   13.03    0.49
 -10   8   1   13.42    0.48
 -10   8   1   13.55    0.49
 -10   8   1   12.81    0.46
   8  -8  -1   12.17    0.48
  -8  -8   1   12.32    0.45
  -8  -8   1   11.59    0.52
  -8  -8   1   12.73    0.44
  -8  -8   1   12.86    0.45
   8   8  -1   11.40    0.55
   8   8  -1   12.39    0.45
  -8   8   1   12.64    0.59
  -8   8   1   12.66    0.54
  -8   8   1   12.19    0.43
  -8   8   1   12.73    0.45
  -8   8   1   12.84    0.54
   8   8  -1   12.00    0.47
   8   8  -1   12.23    0.44
  -6  -8   1   48.45    1.28
  -6  -8   1   45.25    1.32
  -6  -8   1   48.17    1.28
   6  -8  -1   42.13    1.42
  -6  -8   1   47.99    1.29
  -6   8   1   46.00    1.31
   6   8  -1   48.39    1.30
   6   8  -1   47.00    1.33
   6   8  -1   47.78    1.29
  -6   8   1   47.41    1.30
  -6   8   1   48.58    1.28
   6   8  -1   47.68    1.29
  -6   8   1   48.41    1.31
  -4  -8   1   26.69    0.76
  -4  -8   1   26.62    0.75
   4  -8  -1   25.92    0.80
  -4  -8   1   26.13    0.79
  -4  -8   1   26.44    0.79
   4   8  -1   26.13    0.79
   4   8  -1   27.12    0.77
  -4   8   1   26.41    0.80
   4   8  -1   26.64    0.78
  -4   8   1   27.68    0.77
  -4   8   1   26.94    0.79
  -4   8   1   26.94    0.79
  -4   8   1   27.99    0.79
   4   8  -1   25.86    0.79
   4   8  -1   26.97    0.78
  -2  -8   1    0.08    0.11
   2  -8  -1    0.11    0.12
  -2  -8   1    0.05    0.10
   2  -8  -1    0.36    0.13
  -2  -8   1    0.10    0.11
  -2   8   1   -0.03    0.12
  -2   8   1    0.05    0.13
   2   8  -1    0.26    0.12
   2   8  -1    0.13    0.12
   2   8  -1    0.32    0.14
  -2   8   1    0.12    0.12
   2   8  -1    0.02    0.11
  -2   8   1    0.06    0.12
   2   8  -1    0.23    0.11
  -2   8   1    0.10    0.10
   0  -8   1    9.16    0.37
   0  -8  -1    8.85    0.37
   0  -8  -1    8.88    0.32
   0  -8   1    9.06    0.38
   0  -8  -1    9.04    0.37
   0   8  -1    9.42    0.37
   0   8   1    9.18    0.34
   0   8   1    9.20    0.36
   0   8  -1    9.04    0.38
   0   8   1    9.05    0.38
   0   8   1    8.85    0.37
   0   8  -1    9.61    0.36
   0   8  -1    9.60    0.37
   0   8  -1    8.85    0.37
   0   8   1    9.16    0.38
  -2  -8  -1   21.08    0.62
  -2  -8  -1   20.73    0.65
  -2  -8  -1   20.82    0.65
   2  -8   1   21.02    0.67
   2  -8   1   20.48    0.64
  -2   8  -1   20.23    0.65
   2   8   1   21.36    0.65
   2   8   1   20.71    0.64
   2   8   1   21.10    0.65
   2   8   1   20.94    0.64
  -2   8  -1   20.67    0.64
  -2   8  -1   21.38    0.65
  -2   8  -1   21.10    0.65
  -2   8  -1   20.55    0.63
   2   8   1   21.22    0.62
  -4  -8  -1   16.74    0.56
   4  -8   1   17.37    0.56
  -4  -8  -1   17.11    0.55
  -4  -8  -1   17.41    0.56
   4  -8   1   17.07    0.60
  -4  -8  -1   17.13    0.53
   4   8   1   18.10    0.57
   4   8   1   17.76    0.54
   4   8   1   17.73    0.56
  -4   8  -1   17.01    0.57
   4   8   1   17.21    0.56
  -4   8  -1   16.97    0.59
   4   8   1   17.81    0.59
  -4   8  -1   17.90    0.56
  -4   8  -1   17.72    0.57
  -4   8  -1   17.69    0.58
  -6  -8  -1   14.08    0.47
  -6  -8  -1   14.36    0.48
   6  -8   1   14.50    0.49
  -6  -8  -1   14.39    0.48
   6  -8   1   14.50    0.52
   6   8   1   13.14    0.46
   6   8   1   13.53    0.48
  -6   8  -1   13.00    0.51
   6   8   1   13.59    0.51
  -6   8  -1   14.32    0.51
   6   8   1   13.38    0.48
  -6   8  -1   13.40    0.49
  -6   8  -1   13.72    0.48
  -8  -8  -1   29.47    0.85
  -8  -8  -1   29.18    0.92
  -8  -8  -1   30.05    0.83
   8  -8   1   29.00    0.89
  -8   8  -1   29.84    0.86
  -8   8  -1   28.95    0.86
  -8   8  -1   29.54    0.87
   8   8   1   26.85    0.94
  -8   8  -1   27.52    0.99
   8   8   1   30.71    0.89
   8   8   1   29.48    0.87
  -8   8  -1   28.62    0.86
  10  -8   1   13.24    0.53
 -10  -8  -1   13.30    0.50
 -10  -8  -1   13.20    0.50
 -10   8  -1   13.66    0.51
  10   8   1   13.84    0.50
  10   8   1   13.91    0.49
 -10   8  -1   13.05    0.51
  10   8   1   13.97    0.52
 -10   8  -1   13.80    0.50
 -10   8  -1   13.34    0.50
 -10   8  -1   13.10    0.53
 -12  -8  -1    8.64    0.42
 -12  -8  -1    9.27    0.42
  12  -8   1    8.03    0.44
  12   8   1    8.13    0.42
 -12   8  -1    8.20    0.45
 -12   8  -1    8.17    0.47
  12   8   1    8.40    0.38
  12   8   1    8.03    0.39
 -12   8  -1    7.81    0.40
 -12   8  -1    7.85    0.39
 -12   8  -1    8.11    0.40
 -14  -8  -1   31.61    0.97
  14  -8   1   30.97    1.00
 -14  -8  -1   31.97    0.98
  14   8   1   32.30    0.98
 -14   8  -1   31.07    0.98
  14   8   1   32.71    0.95
 -14   8  -1   32.52    0.97
  14   8   1   32.22    0.96
 -14   8  -1   32.71    0.98
 -14   8  -1   32.35    1.01
  16  -8   1    6.05    0.44
 -16  -8  -1    6.19    0.53
 -16  -8  -1    6.45    0.42
  16   8   1    6.43    0.39
 -16   8  -1    6.78    0.42
 -16   8  -1    7.39    0.59
 -16   8  -1    6.04    0.41
  16   8   1    5.52    0.43
 -15  -9   1    0.78    0.20
  15   9  -1    0.75    0.18
  13  -9  -1    1.33    0.23
 -13  -9   1    1.94    0.23
 -13  -9   1    1.59    0.22
 -13   9   1    1.45    0.25
 -13   9   1    1.56    0.22
 -13   9   1    1.76    0.21
 -13   9   1    1.51    0.21
  13   9  -1    1.15    0.20
  13   9  -1    1.76    0.24
  11  -9  -1    4.24    0.37
 -11  -9   1    4.29    0.34
 -11  -9   1    4.34    0.37
 -11  -9   1    3.33    0.32
  11   9  -1    3.81    0.34
  11   9  -1    3.83    0.33
  11   9  -1    4.45    0.35
 -11   9   1    3.97    0.32
 -11   9   1    3.77    0.38
  11   9  -1    3.38    0.36
 -11   9   1    4.18    0.35
 -11   9   1    4.09    0.33
 -11   9   1    3.75    0.47
   9  -9  -1    0.12    0.17
  -9  -9   1   -0.15    0.16
  -9  -9   1    0.12    0.15
  -9  -9   1    0.17    0.15
  -9   9   1    0.10    0.18
   9   9  -1   -0.05    0.16
  -9   9   1    0.14    0.16
  -9   9   1    0.02    0.13
   9   9  -1    0.02    0.15
   9   9  -1   -0.11    0.16
  -9   9   1   -0.18    0.15
  -9   9   1    0.05    0.16
   9   9  -1    0.00    0.16
  -7  -9   1    8.38    0.57
  -7  -9   1    7.76    0.38
  -7  -9   1    8.22    0.40
   7  -9  -1    8.17    0.42
   7   9  -1    7.44    0.37
  -7   9   1    7.86    0.39
   7   9  -1    7.35    0.40
  -7   9   1    8.35    0.43
  -7   9   1    8.03    0.38
   7   9  -1    7.82    0.41
  -7   9   1    8.07    0.37
   7   9  -1    7.72    0.38
  -7   9   1    8.69    0.40
  -5  -9   1   15.98    0.54
  -5  -9   1   15.55    0.55
   5  -9  -1   15.07    0.56
  -5   9   1   14.72    0.55
   5   9  -1   15.46    0.55
  -5   9   1   14.98    0.51
   5   9  -1   15.47    0.55
   5   9  -1   15.06    0.53
  -5   9   1   15.20    0.54
   5   9  -1   15.17    0.55
  -5   9   1   15.74    0.57
  -5   9   1   15.02    0.54
  -3  -9   1   18.57    0.61
  -3  -9   1   17.56    0.60
   3  -9  -1   18.35    0.62
  -3   9   1   18.07    0.61
  -3   9   1   18.05    0.57
  -3   9   1   17.78    0.61
   3   9  -1   18.58    0.62
  -3   9   1   18.67    0.61
   3   9  -1   17.67    0.60
   3   9  -1   18.18    0.67
   3   9  -1   18.73    0.62
   1  -9  -1    3.48    0.29
  -1  -9   1    3.69    0.29
  -1  -9   1    3.86    0.29
   1   9  -1    3.72    0.29
   1   9  -1    3.76    0.30
  -1   9   1    3.31    0.28
  -1   9   1    3.51    0.30
   1   9  -1    3.49    0.29
  -1   9   1    3.37    0.29
  -1   9   1    3.48    0.25
   1   9  -1    3.74    0.30
  -1   9   1    3.83    0.32
   1   9  -1    3.45    0.27
  -1  -9  -1   16.06    0.56
   1  -9   1   16.22    0.56
   1  -9   1   15.77    0.57
  -1   9  -1   16.41    0.56
   1   9   1   16.42    0.56
   1   9   1   15.73    0.55
  -1   9  -1   15.73    0.56
  -1   9  -1   15.98    0.55
   1   9   1   16.46    0.56
  -1   9  -1   16.33    0.56
   1   9   1   15.81    0.56
   1   9   1   16.38    0.53
  -1   9  -1   15.99    0.57
  -3  -9  -1   23.48    0.74
   3  -9   1   23.80    0.74
  -3  -9  -1   23.65    0.74
   3  -9   1   23.50    0.76
   3   9   1   22.59    0.70
   3   9   1   23.09    0.74
  -3   9  -1   23.43    0.73
   3   9   1   23.81    0.73
  -3   9  -1   22.92    0.74
  -3   9  -1   22.88    0.74
  -3   9  -1   24.09    0.77
   3   9   1   23.92    0.73
   3   9   1   24.38    0.75
  -5  -9  -1    2.26    0.32
   5  -9   1    1.91    0.22
  -5   9  -1    1.49    0.19
  -5   9  -1    2.02    0.29
  -5   9  -1    2.09    0.31
   5   9   1    1.86    0.24
   5   9   1    2.00    0.20
   5   9   1    1.78    0.21
   5   9   1    1.86    0.27
  -5   9  -1    1.79    0.26
  -5   9  -1    1.97    0.20
   7  -9   1    6.85    0.40
  -7  -9  -1    7.10    0.39
  -7   9  -1    7.39    0.40
  -7   9  -1    6.96    0.38
   7   9   1    7.15    0.37
  -7   9  -1    6.60    0.35
   7   9   1    7.14    0.39
   7   9   1    6.53    0.34
  -7   9  -1    7.19    0.37
  -7   9  -1    6.91    0.38
   7   9   1    6.53    0.38
  -9  -9  -1    9.43    0.43
  -9  -9  -1    9.18    0.45
   9  -9   1    9.13    0.47
  -9   9  -1    9.15    0.41
  -9   9  -1    9.10    0.44
   9   9   1    9.47    0.43
  -9   9  -1    9.50    0.44
  -9   9  -1    9.16    0.47
   9   9   1    9.51    0.43
   9   9   1    8.92    0.45
  -9   9  -1    8.13    0.45
   9   9   1    9.07    0.41
 -11  -9  -1    2.21    0.24
 -11  -9  -1    2.38    0.35
  11  -9   1    2.51    0.36
  11   9   1    2.49    0.29
  11   9   1    3.28    0.34
 -11   9  -1    3.07    0.33
  11   9   1    3.14    0.36
 -11   9  -1    2.09    0.23
 -11   9  -1    2.44    0.30
 -11   9  -1    3.14    0.37
 -11   9  -1    2.82    0.35
 -13  -9  -1   10.59    0.49
 -13  -9  -1    9.94    0.50
  13  -9   1   10.01    0.57
 -13   9  -1   10.92    0.53
  13   9   1    9.98    0.47
 -13   9  -1    9.60    0.45
  10  10  -1    1.16    0.20
  10  10  -1    0.86    0.26
 -10  10   1    1.22    0.24
  10  10  -1    1.74    0.23
 -10  10   1    1.55    0.25
  -8 -10   1    2.84    0.32
   8 -10  -1    2.35    0.36
   8  10  -1    2.66    0.36
  -8  10   1    3.32    0.35
   8  10  -1    3.00    0.31
   8  10  -1    2.69    0.34
  -8  10   1    2.97    0.34
  -8  10   1    3.23    0.33
   8  10  -1    2.98    0.36
  -6 -10   1    5.21    0.34
   6 -10  -1    5.08    0.39
  -6 -10   1    4.63    0.36
  -6  10   1    5.20    0.37
  -6  10   1    5.48    0.43
   6  10  -1    4.89    0.39
  -6  10   1    4.85    0.37
  -6  10   1    4.02    0.37
   6  10  -1    5.11    0.38
   6  10  -1    4.47    0.33
   6  10  -1    4.95    0.35
   4 -10  -1   13.61    0.55
  -4 -10   1   13.13    0.52
  -4 -10   1   13.28    0.53
   4  10  -1   12.70    0.51
  -4  10   1   12.45    0.53
   4  10  -1   13.09    0.50
   4  10  -1   12.94    0.53
  -4  10   1   12.49    0.55
  -4  10   1   13.71    0.57
   4  10  -1   13.12    0.55
  -4  10   1   12.86    0.53
  -2 -10   1    0.83    0.19
   2 -10  -1    1.03    0.19
  -2 -10   1    0.63    0.17
  -2  10   1    0.62    0.19
   2  10  -1    0.80    0.18
   2  10  -1    0.95    0.17
  -2  10   1    0.73    0.19
   2  10  -1    0.90    0.19
  -2  10   1    0.99    0.19
  -2  10   1    1.26    0.23
   2  10  -1    0.98    0.21
   0 -10   1    7.13    0.40
   0 -10  -1    7.15    0.40
   0 -10   1    6.23    0.39
   0  10  -1    5.81    0.38
   0  10   1    6.33    0.39
   0  10   1    5.69    0.38
   0  10  -1    5.78    0.38
   0  10  -1    5.92    0.34
   0  10  -1    5.88    0.39
   0  10   1    5.75    0.37
  -2 -10  -1    5.80    0.36
   2 -10   1    5.72    0.39
   2  10   1    4.80    0.37
  -2  10  -1    5.76    0.39
   2  10   1    4.87    0.36
  -2  10  -1    4.84    0.37
   2  10   1    5.31    0.37
  -2  10  -1    4.91    0.37
  -2  10  -1    4.48    0.31
  -4 -10  -1    2.01    0.29
   4 -10   1    2.56    0.34
   4  10   1    2.29    0.33
  -4  10  -1    2.40    0.28
   4  10   1    1.81    0.22
  -4  10  -1    2.13    0.24
  -4  10  -1    2.59    0.36
  -4  10  -1    2.13    0.25
  -4  10  -1    2.06    0.25
   4  10   1    1.87    0.22
   6 -10   1    5.72    0.40
  -6  10  -1    5.82    0.43
  -6  10  -1    5.38    0.38
  -6  10  -1    5.47    0.35
  -6  10  -1    5.56    0.39
   6  10   1    5.00    0.38
   6  10   1    4.97    0.38
   6  10   1    5.09    0.38
  -6  10  -1    5.62    0.39
   8 -10   1    3.27    0.47
   8  10   1    2.99    0.36
   8  10   1    3.67    0.33
  -8  10  -1    3.25    0.40
  -8  10  -1    3.71    0.42
   8  10   1    3.44    0.47
  -8  10  -1    3.22    0.41
 -10 -10  -1    3.55    0.42
 -26   0   2    3.28    0.35
 -26   0   2    3.05    0.37
 -26   0   2    2.61    0.33
  26   0  -2    2.66    0.35
 -24   0   2   23.67    0.75
  24   0  -2   22.88    0.76
 -24   0   2   23.17    0.76
 -24   0   2   22.80    0.76
 -24   0   2   23.41    0.72
 -22   0   2   39.03    1.12
 -22   0   2   40.59    1.15
 -22   0   2   40.32    1.16
  22   0  -2   41.74    1.16
 -22   0   2   39.93    1.14
 -20   0   2    2.53    0.21
  20   0  -2    2.74    0.24
 -20   0   2    2.79    0.24
 -20   0   2    2.64    0.25
 -18   0   2    2.49    0.19
  18   0  -2    2.33    0.59
  18   0  -2    3.76    1.23
  18   0  -2    2.38    0.21
 -18   0   2    2.69    0.21
 -18   0   2    2.49    0.20
 -16   0   2   28.46    0.82
  16   0  -2   29.43    0.82
  16   0  -2   29.72    1.31
 -16   0   2   29.99    0.83
 -16   0   2   29.69    0.75
  16   0  -2   28.70    1.32
 -16   0   2   29.38    0.81
  16   0  -2   31.26    1.91
  16   0  -2   27.55    1.99
  14   0  -2   36.61    1.37
  14   0  -2   36.49    0.94
 -14   0   2   37.25    0.93
 -14   0   2   36.56    0.93
  14   0  -2   38.06    1.41
  14   0  -2   36.28    1.91
 -14   0   2   35.57    0.97
 -14   0   2   36.10    0.98
  14   0  -2   35.56    1.80
  14   0  -2   35.73    0.98
  12   0  -2  137.12    3.64
  12   0  -2  149.49    4.00
  12   0  -2  152.76    4.36
 -12   0   2  142.46    3.63
 -12   0   2  136.30    3.66
  12   0  -2  148.98    4.35
 -12   0   2  139.24    3.67
  12   0  -2  149.54    4.01
  10   0  -2  297.57    7.79
  10   0  -2  290.74    7.76
  10   0  -2  288.86    7.51
  10   0  -2  275.45    7.50
   8   0  -2  150.42    3.82
  -8   0   2  134.29    3.63
   8   0  -2  144.57    3.99
   8   0  -2  139.43    3.81
   8   0  -2  152.43    4.01
  -6   0   2   44.94    1.17
   6   0  -2   46.98    1.40
   6   0  -2   48.30    1.29
   6   0  -2   44.46    1.18
  -6   0   2   44.81    1.18
   6   0  -2   45.16    1.18
  -6   0   2   47.23    1.17
  -6   0   2   46.13    1.18
   6   0  -2   46.09    1.18
  -6   0   2   44.22    1.39
  -6   0   2   46.10    1.17
  -6   0   2   47.07    1.18
  -6   0   2   46.21    1.17
  -6   0   2   49.29    1.18
   0   0  -2    9.49    0.25
   0   0  -2    9.97    0.25
   0   0  -2    9.36    0.25
   0   0  -2    9.23    0.25
   0   0  -2   10.09    0.26
   0   0   2    9.96    0.26
   0   0   2    9.74    0.25
   0   0   2    9.08    0.25
   0   0   2    7.97    0.56
   0   0   2   10.26    0.25
   0   0   2    9.65    0.25
   0   0  -2    9.50    0.43
   0   0  -2    9.45    0.25
   0   0   2    9.72    0.25
   0   0   2    8.55    0.43
   0   0  -2    9.41    0.25
   0   0  -2    9.60    0.56
   0   0   2   10.08    0.26
   0   0   2    9.47    0.25
  -2   0  -2   67.45    1.77
   2   0   2   71.82    1.78
   2   0   2   71.20    1.78
   2   0   2   70.84    2.32
  -2   0  -2   68.30    1.78
  -2   0  -2   71.18    1.78
  -2   0  -2   66.20    2.04
   2   0   2   71.94    2.06
   2   0   2   71.82    1.77
  -2   0  -2   70.70    1.77
  -4   0  -2   77.73    2.05
   4   0   2   78.57    2.06
  -4   0  -2   86.24    2.43
  -4   0  -2   79.99    2.05
   4   0   2   80.74    2.74
   4   0   2   80.23    2.06
  -4   0  -2   79.71    2.06
  -4   0  -2   85.73    2.76
   4   0   2   81.05    2.42
   6   0   2   10.17    0.28
  -6   0  -2   10.26    0.30
  -6   0  -2   10.00    0.29
   6   0   2   10.22    0.27
  -6   0  -2   11.22    0.66
  -6   0  -2   10.80    0.28
   6   0   2   10.69    0.26
   6   0   2   10.46    0.27
  -6   0  -2   10.46    0.30
   6   0   2    9.39    0.29
  -6   0  -2    9.74    0.90
   6   0   2    9.98    0.30
   8   0   2   80.90    2.15
   8   0   2   82.37    2.16
   8   0   2   86.64    2.96
   8   0   2   78.17    3.50
  -8   0  -2   94.07    3.26
  -8   0  -2   84.33    2.16
  -8   0  -2   83.18    2.15
   8   0   2   81.46    2.13
  -8   0  -2   92.62    2.73
  -8   0  -2   81.28    2.16
   8   0   2   82.30    2.12
  -8   0  -2   85.52    2.13
 -10   0  -2   88.68    2.30
  10   0   2   91.02    2.94
  10   0   2   88.55    3.52
 -10   0  -2   91.28    3.52
  10   0   2   87.23    2.25
  10   0   2   90.10    2.26
 -10   0  -2   93.28    2.26
 -10   0  -2   89.48    2.30
 -10   0  -2   90.83    2.93
  10   0   2   87.00    2.30
 -10   0  -2   86.26    2.29
  12   0   2    1.02    1.00
 -12   0  -2    1.11    0.14
 -12   0  -2    0.91    0.11
 -12   0  -2    1.20    0.06
 -12   0  -2    1.04    0.13
  12   0   2    0.97    0.14
  12   0   2    0.57    0.49
 -14   0  -2    4.87    0.24
 -14   0  -2    4.81    0.21
  14   0   2    5.00    0.24
 -14   0  -2    4.82    0.22
  14   0   2    4.40    0.84
  14   0   2    3.84    1.50
 -14   0  -2    5.02    0.24
  14   0   2    3.67    0.69
  14   0   2    2.22    1.26
 -16   0  -2   27.09    0.74
 -16   0  -2   26.48    0.77
  16   0   2   26.69    0.78
 -16   0  -2   26.30    0.76
 -16   0  -2   25.90    0.77
 -16   0  -2   26.28    0.77
  18   0   2   34.77    1.01
 -18   0  -2   34.73    1.00
 -18   0  -2   35.25    1.00
 -18   0  -2   35.46    0.96
 -18   0  -2   34.22    0.98
 -18   0  -2   34.64    1.00
 -20   0  -2    1.22    0.18
 -20   0  -2    1.23    0.15
 -20   0  -2    1.34    0.19
 -20   0  -2    1.02    0.17
 -22   0  -2    4.64    0.32
 -22   0  -2    5.00    0.36
 -22   0  -2    4.52    0.35
 -22   0  -2    5.33    0.38
 -27  -1   2    4.54    0.35
 -25  -1   2    2.14    0.28
 -25  -1   2    2.00    0.24
 -25  -1   2    1.83    0.23
 -25  -1   2    1.59    0.21
  25   1  -2    1.30    0.22
 -25   1   2    1.39    0.21
 -25   1   2    1.51    0.21
 -25   1   2    1.13    0.20
 -23  -1   2   13.63    0.52
 -23  -1   2   14.12    0.49
  23  -1  -2   14.29    0.53
 -23  -1   2   13.88    0.53
  23   1  -2   13.04    0.52
 -23   1   2   13.67    0.50
 -23   1   2   13.30    0.51
 -23   1   2   12.73    0.52
 -23   1   2   13.38    0.47
 -21  -1   2   14.32    0.48
 -21  -1   2   13.84    0.53
  21   1  -2   12.56    0.63
 -21   1   2   13.98    0.45
 -21   1   2   13.33    0.69
 -21   1   2   14.26    0.50
 -21   1   2   14.01    0.48
 -19  -1   2    0.51    0.12
  19  -1  -2   -0.15    1.12
  19  -1  -2    0.81    0.56
 -19  -1   2    0.36    0.11
  19  -1  -2    0.44    0.12
  19   1  -2    0.51    0.13
 -19   1   2    0.49    0.12
 -19   1   2    0.64    0.13
 -19   1   2    0.59    0.10
 -19   1   2    0.57    0.12
  17  -1  -2   31.85    1.31
  17  -1  -2   32.99    0.90
 -17  -1   2   32.12    0.90
  17  -1  -2   32.54    1.89
  17  -1  -2   30.98    1.31
  17  -1  -2   32.85    0.85
 -17  -1   2   32.57    0.89
  17  -1  -2   31.71    1.93
 -17   1   2   32.73    0.90
  17   1  -2   29.72    1.57
  17   1  -2   32.59    0.90
  17   1  -2   29.25    2.40
 -17   1   2   32.29    0.87
 -17   1   2   32.31    0.89
 -17   1   2   32.65    0.91
  15  -1  -2   25.90    0.72
 -15  -1   2   25.02    0.71
 -15  -1   2   26.27    0.65
 -15  -1   2   25.30    0.71
  15  -1  -2   23.12    1.05
  15  -1  -2   25.96    0.68
  15  -1  -2   24.02    1.53
 -15   1   2   25.36    0.71
 -15   1   2   24.45    0.72
  15   1  -2   26.64    1.30
  15   1  -2   25.46    0.72
  15   1  -2   26.53    2.08
  15   1  -2   25.10    1.97
  15   1  -2   24.90    1.32
  13  -1  -2    1.20    0.09
  13  -1  -2    1.02    0.28
  13  -1  -2    1.03    0.46
  13  -1  -2    1.49    0.27
 -13  -1   2    1.36    0.12
 -13  -1   2    1.17    0.06
  13  -1  -2    1.30    0.13
 -13  -1   2    1.06    0.12
  13  -1  -2    1.54    0.55
  13   1  -2    1.41    0.69
  13   1  -2    0.87    0.39
 -13   1   2    1.20    0.05
  13   1  -2    0.59    0.34
 -13   1   2    1.36    0.05
  13   1  -2    1.30    0.78
  13   1  -2    1.24    0.13
 -13   1   2    1.03    0.13
 -13   1   2    1.10    0.14
 -13   1   2    1.08    0.09
 -11  -1   2   76.19    1.90
  11  -1  -2   80.61    2.14
  11  -1  -2   76.64    2.13
  11  -1  -2   76.20    1.93
 -11  -1   2   79.12    1.91
 -11  -1   2   72.50    1.95
  11  -1  -2   75.93    2.34
  11  -1  -2   75.75    1.95
 -11  -1   2   77.06    1.95
  11  -1  -2   75.05    2.34
 -11  -1   2   77.35    1.92
 -11  -1   2   78.22    1.92
 -11   1   2   76.12    1.91
  11   1  -2   73.63    1.95
  11   1  -2   76.34    2.36
 -11   1   2   73.21    1.93
  11   1  -2   75.87    2.37
  11   1  -2   76.37    1.92
 -11   1   2   72.31    1.94
  11   1  -2   73.27    2.75
  11   1  -2   74.81    2.77
  11   1  -2   73.18    1.92
 -11   1   2   75.05    1.91
   9  -1  -2  196.60    5.17
   9  -1  -2  198.61    5.30
   9   1  -2  203.11    5.76
   9   1  -2  203.87    5.42
  -7  -1   2   23.62    0.57
   7  -1  -2   20.45    0.62
  -7  -1   2   23.29    1.13
  -7  -1   2   21.76    0.58
  -7  -1   2   22.33    0.57
  -7  -1   2   21.56    0.86
   7  -1  -2   20.19    0.69
   7  -1  -2   22.27    0.58
  -7  -1   2   23.22    0.58
   7  -1  -2   21.07    0.58
  -7  -1   2   23.18    0.57
  -7  -1   2   22.45    0.56
   7  -1  -2   21.66    0.58
  -7   1   2   21.35    0.58
  -7   1   2   22.52    0.58
  -7   1   2   22.25    0.59
  -7   1   2   22.17    0.57
   7   1  -2   22.31    0.59
   7   1  -2   22.85    0.56
  -7   1   2   22.84    0.58
   7   1  -2   21.82    0.58
   7   1  -2   23.45    0.57
   7   1  -2   21.46    0.57
   7   1  -2   20.85    0.84
   7   1  -2   20.36    1.08
  -5  -1   2   37.36    0.95
   5  -1  -2   39.19    1.03
  -5  -1   2   36.91    0.94
   5  -1  -2   35.83    0.94
  -5  -1   2   36.61    0.95
  -5  -1   2   35.40    0.94
   5  -1  -2   33.71    0.94
  -5  -1   2   32.75    0.95
   5  -1  -2   38.57    0.98
  -5  -1   2   36.80    0.93
   5  -1  -2   35.50    0.95
  -5  -1   2   34.86    1.18
  -5  -1   2   36.40    1.41
  -5  -1   2   34.93    0.94
   5   1  -2   37.67    0.93
  -5   1   2   37.83    0.95
  -5   1   2   36.89    0.94
  -5   1   2   38.59    0.94
  -5   1   2   38.16    0.94
   5   1  -2   38.66    0.94
   5   1  -2   36.92    0.95
   5   1  -2   37.06    0.95
  -5   1   2   37.03    0.94
   5   1  -2   36.22    0.95
  -5   1   2   38.23    0.98
   5   1  -2   36.18    0.94
   5   1  -2   40.06    1.20
   5   1  -2   38.34    1.41
  -5   1   2   37.65    0.95
  -5   1   2   35.03    1.02
   5   1  -2   39.33    0.94
  -3  -1   2  564.04   14.90
   3   1  -2  620.09   14.93
  -3   1   2  544.63   14.67
  -1  -1   2  260.22    6.98
  -1  -1   2  268.77    7.22
  -1   1   2  278.16    6.95
  -1   1   2  267.37    7.13
   1   1  -2  251.40    6.97
   1   1  -2  270.87    7.21
  -1   1   2  257.32    6.93
  -1   1   2  292.41    7.18
  -1  -1  -2  127.04    3.14
   1  -1   2  127.56    3.70
   1  -1   2  122.04    3.42
   1   1   2  122.22    3.44
  -1   1  -2  127.15    3.67
   1   1   2  123.26    3.71
  -1   1  -2  124.20    3.42
  -3  -1  -2   70.65    1.75
  -3  -1  -2   67.91    1.76
   3  -1   2   70.39    1.75
   3  -1   2   71.15    2.38
  -3  -1  -2   67.97    1.76
  -3  -1  -2   72.16    2.48
   3  -1   2   73.93    1.76
   3  -1   2   70.22    1.75
   3  -1   2   70.93    2.09
   3  -1   2   70.82    1.76
  -3  -1  -2   73.40    2.16
  -3  -1  -2   72.82    1.75
  -3  -1  -2   67.84    1.76
   3  -1   2   71.02    1.76
   3  -1   2   70.19    1.75
   3   1   2   64.04    2.10
  -3   1  -2   66.47    1.76
  -3   1  -2   65.64    1.76
   3   1   2   64.74    1.75
  -3   1  -2   66.77    1.76
  -3   1  -2   70.06    2.08
   3   1   2   64.29    2.42
   3   1   2   67.57    1.76
   3   1   2   70.22    1.75
   3   1   2   71.04    1.76
  -3   1  -2   67.06    1.75
  -3   1  -2   72.44    1.74
   3   1   2   68.46    1.76
  -3   1  -2   66.38    2.35
  -3   1  -2   66.63    1.75
   5  -1   2   79.96    2.00
   5  -1   2   83.76    2.00
  -5  -1  -2   74.99    2.01
  -5  -1  -2   78.58    2.01
  -5   1  -2   81.17    2.00
   5   1   2   77.76    2.01
   5   1   2   76.36    2.88
  -5   1  -2   78.54    1.99
  -5   1  -2   77.78    2.01
   5   1   2   83.40    1.99
   5   1   2   81.25    2.49
  -5   1  -2   76.33    2.01
   5   1   2   77.44    2.01
  -5   1  -2   77.32    2.01
  -5   1  -2   78.25    2.00
  -7  -1  -2   69.17    1.82
  -7  -1  -2   70.62    1.82
   7  -1   2   69.12    1.80
   7  -1   2   71.47    2.72
   7  -1   2   70.87    1.80
   7  -1   2   71.86    2.29
   7   1   2   69.78    1.82
   7   1   2   74.70    2.39
  -7   1  -2   71.92    2.72
  -7   1  -2   70.91    1.81
   7   1   2   71.79    1.79
   7   1   2   72.84    1.79
  -7   1  -2   69.10    1.82
  -7   1  -2   69.69    1.80
   7   1   2   70.44    1.81
  -7   1  -2   73.71    2.31
  -7   1  -2   67.67    1.82
  -7   1  -2   70.51    1.82
   7   1   2   71.53    2.86
  -9  -1  -2   53.03    1.53
   9  -1   2   58.54    1.49
  -9  -1  -2   56.21    1.54
   9  -1   2   57.10    1.49
   9  -1   2   59.06    1.54
   9  -1   2   59.74    2.60
   9  -1   2   61.41    2.09
  -9   1  -2   60.97    1.53
  -9   1  -2   58.99    1.51
  -9   1  -2   60.52    1.50
   9   1   2   63.71    2.56
  -9   1  -2   57.66    2.57
   9   1   2   58.62    1.51
   9   1   2   58.91    2.72
  -9   1  -2   57.47    1.52
   9   1   2   56.68    2.12
   9   1   2   59.51    1.48
  -9   1  -2   58.59    2.06
   9   1   2   57.30    3.29
   9   1   2   56.55    1.52
  11  -1   2   20.64    0.54
  11  -1   2   22.21    1.82
 -11  -1  -2   19.92    0.58
  11  -1   2   19.64    0.58
 -11  -1  -2   19.42    0.58
  11  -1   2   21.68    1.20
  11   1   2   20.81    1.93
  11   1   2   20.86    0.57
 -11   1  -2   21.30    0.57
 -11   1  -2   21.05    0.55
 -11   1  -2   20.88    1.83
  11   1   2   20.17    1.27
 -11   1  -2   19.73    0.58
  11   1   2   21.78    2.05
 -11   1  -2   19.71    0.59
 -11   1  -2   22.60    1.22
  11   1   2   19.67    0.58
  11   1   2   19.48    1.28
 -11   1  -2   20.84    0.59
 -13  -1  -2   15.62    0.48
  13  -1   2   16.10    0.42
  13  -1   2   16.97    1.26
  13  -1   2   15.36    2.02
 -13  -1  -2   15.97    0.49
 -13  -1  -2   15.02    0.48
 -13   1  -2   15.62    0.48
  13   1   2   16.12    1.28
  13   1   2   17.20    2.22
 -13   1  -2   15.67    0.46
  13   1   2   13.97    2.15
 -13   1  -2   15.13    0.48
  13   1   2   16.05    0.46
 -13   1  -2   15.49    0.44
  13   1   2   14.08    1.26
  13   1   2   15.44    0.48
 -13   1  -2   17.85    2.18
 -13   1  -2   15.72    0.49
 -13   1  -2   15.76    1.27
 -15  -1  -2   19.83    0.60
 -15  -1  -2   20.05    0.61
 -15  -1  -2   20.28    0.60
 -15  -1  -2   19.95    0.59
  15   1   2   20.33    0.61
 -15   1  -2   20.63    0.59
 -15   1  -2   20.95    0.57
 -15   1  -2   20.38    0.61
 -15   1  -2   19.33    0.60
 -15   1  -2   19.65    0.61
 -17  -1  -2   25.29    0.75
 -17  -1  -2   25.59    0.75
 -17  -1  -2   24.50    0.74
 -17  -1  -2   25.46    0.73
 -17   1  -2   24.85    0.75
  17   1   2   24.54    0.75
 -17   1  -2   24.95    0.75
 -17   1  -2   25.84    0.70
 -17   1  -2   25.02    0.72
 -17   1  -2   24.41    0.75
 -19  -1  -2    0.50    0.15
 -19  -1  -2    0.31    0.15
 -19  -1  -2    0.16    0.15
 -19  -1  -2    0.36    0.12
 -19   1  -2    0.30    0.14
 -19   1  -2    0.15    0.12
  19   1   2    0.17    0.14
 -19   1  -2    0.09    0.15
 -19   1  -2    0.14    0.14
 -21  -1  -2    4.40    0.35
 -21  -1  -2    4.77    0.29
 -21  -1  -2    4.77    0.36
 -21  -1  -2    4.61    0.31
 -21  -1  -2    4.04    0.34
 -21   1  -2    4.67    0.32
 -21   1  -2    4.95    0.29
 -21   1  -2    4.48    0.35
  21   1   2    4.65    0.35
 -21   1  -2    4.75    0.35
 -23  -1  -2    5.51    0.41
 -23  -1  -2    4.22    0.37
 -23  -1  -2    4.95    0.35
 -23  -1  -2    4.85    0.37
 -23   1  -2    4.72    0.37
 -23   1  -2    5.20    0.36
 -23   1  -2    4.44    0.39
 -26  -2   2    0.71    0.26
 -26  -2   2    0.29    0.17
  26   2  -2    0.10    0.25
 -26   2   2    0.11    0.16
 -26   2   2    0.33    0.17
 -24  -2   2    2.75    0.34
 -24  -2   2    2.27    0.33
 -24  -2   2    2.68    0.30
 -24   2   2    2.30    0.27
 -24   2   2    2.48    0.33
 -24   2   2    2.96    0.33
  24   2  -2    2.93    0.33
 -24   2   2    2.86    0.30
 -22  -2   2    3.02    0.27
 -22  -2   2    2.86    0.29
 -22  -2   2    3.24    0.29
 -22   2   2    3.22    0.29
 -22   2   2    3.07    0.29
  22   2  -2    3.04    0.30
 -22   2   2    3.55    0.29
 -20  -2   2    2.28    0.25
 -20  -2   2    2.48    0.24
  20   2  -2    2.08    0.25
 -20   2   2    2.45    0.23
 -20   2   2    2.74    0.19
 -20   2   2    2.28    0.25
 -18  -2   2    0.81    0.12
  18  -2  -2    1.72    0.96
  18  -2  -2    0.68    0.43
  18  -2  -2    0.88    0.10
 -18  -2   2    0.59    0.12
 -18   2   2    0.52    0.12
 -18   2   2    0.91    0.13
 -18   2   2    0.63    0.13
  18   2  -2    0.64    0.12
 -18   2   2    0.95    0.12
  16  -2  -2   22.52    1.46
 -16  -2   2   25.33    0.71
  16  -2  -2   24.72    1.52
 -16  -2   2   26.70    0.71
  16  -2  -2   25.89    0.70
  16  -2  -2   23.89    1.02
 -16  -2   2   26.02    0.64
  16  -2  -2   25.54    1.02
  16   2  -2   21.26    1.39
  16   2  -2   19.09    2.43
 -16   2   2   24.98    0.71
 -16   2   2   24.42    0.66
  16   2  -2   21.28    2.22
 -16   2   2   24.37    0.70
  16   2  -2   20.44    1.45
 -16   2   2   24.27    0.69
  16   2  -2   24.43    0.76
  14  -2  -2    3.53    0.72
 -14  -2   2    5.37    0.16
  14  -2  -2    4.98    0.19
 -14  -2   2    5.19    0.22
  14  -2  -2    4.14    0.54
  14  -2  -2    5.00    0.22
 -14  -2   2    5.05    0.22
 -14  -2   2    5.15    0.14
 -14   2   2    4.93    0.20
 -14   2   2    4.76    0.14
 -14   2   2    4.74    0.22
  14   2  -2    4.74    0.22
  14   2  -2    4.47    0.70
 -14   2   2    4.69    0.22
  14   2  -2    4.91    0.17
 -14   2   2    4.92    0.17
  14   2  -2    4.19    1.14
 -14   2   2    4.98    0.14
  14   2  -2    4.51    1.27
  14   2  -2    4.44    0.84
 -12  -2   2   18.85    0.54
  12  -2  -2   19.43    0.53
 -12  -2   2   19.54    0.51
  12  -2  -2   17.98    0.56
  12  -2  -2   17.57    1.03
 -12  -2   2   19.84    0.50
  12  -2  -2   17.83    0.74
 -12  -2   2   18.89    0.54
 -12   2   2   18.80    1.01
 -12   2   2   20.10    0.50
 -12   2   2   19.37    0.55
  12   2  -2   16.58    1.07
  12   2  -2   19.57    0.51
  12   2  -2   20.09    1.11
  12   2  -2   18.02    1.69
 -12   2   2   19.17    0.54
 -12   2   2   19.41    0.53
  12   2  -2   18.84    0.55
  12   2  -2   18.76    1.63
 -12   2   2   19.96    0.75
 -12   2   2   19.63    0.51
 -10  -2   2   27.24    0.68
 -10  -2   2   24.96    0.71
  10  -2  -2   26.13    0.70
  10  -2  -2   26.06    0.89
 -10  -2   2   24.02    1.95
  10  -2  -2   26.40    0.69
 -10  -2   2   26.18    0.69
  10  -2  -2   25.20    1.11
  10  -2  -2   25.67    0.70
 -10  -2   2   28.91    1.52
 -10  -2   2   27.78    0.67
  10   2  -2   29.19    1.70
  10   2  -2   25.76    0.70
 -10   2   2   25.73    0.69
 -10   2   2   26.01    0.70
 -10   2   2   25.61    0.71
 -10   2   2   26.19    0.68
 -10   2   2   26.67    0.88
 -10   2   2   25.67    0.68
  10   2  -2   25.98    0.68
 -10   2   2   26.38    0.70
  10   2  -2   25.35    1.18
 -10   2   2   26.67    1.10
  10   2  -2   26.17    0.71
   8  -2  -2   81.71    2.16
   8  -2  -2   77.28    1.97
  -8  -2   2   75.37    1.97
   8  -2  -2   75.10    1.98
  -8  -2   2   79.65    1.97
  -8  -2   2   79.50    2.47
  -8  -2   2   77.35    2.88
  -8  -2   2   78.41    1.96
   8  -2  -2   84.98    2.36
  -8  -2   2   76.31    1.99
   8   2  -2   73.70    1.98
  -8   2   2   75.25    1.97
   8   2  -2   78.25    1.96
  -8   2   2   79.31    2.15
   8   2  -2   73.62    1.99
   8   2  -2   75.23    1.98
  -8   2   2   75.80    1.98
   8   2  -2   75.43    1.96
  -8   2   2   74.92    1.98
  -8   2   2   82.25    2.34
  -8   2   2   75.76    1.99
  -8   2   2   75.21    1.96
   8   2  -2   85.14    2.92
   8   2  -2   80.82    2.46
  -8   2   2   75.30    1.97
  -8   2   2   78.83    1.97
   6  -2  -2  113.77    3.14
  -6  -2   2  115.37    2.74
  -6  -2   2  102.00    2.75
  -6  -2   2  108.70    2.75
   6  -2  -2  107.73    2.76
   6  -2  -2  115.65    2.95
  -6  -2   2  107.30    3.17
  -6  -2   2  105.38    3.55
   6  -2  -2  107.47    2.74
  -6   2   2  112.39    2.95
   6   2  -2  108.16    3.17
  -6   2   2  107.41    2.75
   6   2  -2  111.16    2.74
  -6   2   2  111.60    2.75
   6   2  -2  100.99    3.51
  -6   2   2  106.08    2.75
  -6   2   2  109.40    2.74
   6   2  -2  106.81    2.76
  -6   2   2  109.02    3.13
   6   2  -2  106.46    2.75
  -6   2   2  106.40    2.75
  -4  -2   2   45.38    1.13
   4  -2  -2   46.20    1.14
   4  -2  -2   45.08    1.58
   4  -2  -2   46.95    1.14
   4  -2  -2   44.92    1.37
   4  -2  -2   45.38    1.14
  -4  -2   2   44.17    1.13
  -4  -2   2   40.37    1.50
   4  -2  -2   42.07    1.15
  -4  -2   2   44.39    1.13
  -4  -2   2   37.95    1.80
  -4  -2   2   43.60    1.14
   4  -2  -2   41.90    1.13
  -4  -2   2   43.41    1.14
  -4  -2   2   49.99    1.15
  -4   2   2   43.18    1.15
  -4   2   2   46.72    1.14
   4   2  -2   45.12    1.13
  -4   2   2   45.06    1.12
  -4   2   2   42.88    1.57
   4   2  -2   48.32    1.87
  -4   2   2   45.56    1.13
   4   2  -2   43.78    1.14
   4   2  -2   43.61    1.13
   4   2  -2   48.10    1.53
  -4   2   2   44.96    1.14
  -4   2   2   43.63    1.14
   4   2  -2   45.17    1.15
  -4   2   2   40.26    1.12
   4   2  -2   44.07    1.14
  -4   2   2   44.12    1.14
  -4   2   2   45.74    1.37
   4   2  -2   45.02    1.13
  -4   2   2   46.01    1.13
  -4   2   2   44.73    1.14
   2  -2  -2  186.20    4.91
  -2  -2   2  203.03    5.68
  -2  -2   2  183.32    4.91
  -2  -2   2  191.13    5.29
   2  -2  -2  201.27    4.93
  -2   2   2  180.78    4.92
  -2   2   2  200.32    5.23
   2   2  -2  203.29    5.31
  -2   2   2  203.59    5.51
   2   2  -2  200.59    5.64
   0  -2   2   44.65    1.47
   0  -2   2   44.20    1.09
   0  -2  -2   42.12    1.09
   0  -2  -2   41.41    1.74
   0  -2  -2   43.42    1.09
   0  -2  -2   43.40    1.10
   0  -2  -2   43.03    1.09
   0  -2  -2   42.01    1.09
   0  -2  -2   42.88    1.44
   0  -2   2   43.26    1.08
   0  -2  -2   41.55    1.09
   0  -2  -2   42.17    1.10
   0  -2   2   45.04    1.10
   0  -2   2   41.84    1.79
   0  -2   2   42.70    1.10
   0  -2   2   42.89    1.10
   0  -2  -2   42.23    1.08
   0   2   2   41.09    1.10
   0   2   2   44.13    1.09
   0   2   2   44.60    1.74
   0   2  -2   40.80    1.10
   0   2   2   42.70    1.10
   0   2   2   41.34    1.09
   0   2  -2   40.96    1.10
   0   2  -2   41.40    1.08
   0   2   2   44.99    1.45
   0   2   2   43.99    1.10
   0   2   2   42.19    1.10
   0   2   2   43.05    1.09
   0   2  -2   44.81    1.47
   0   2  -2   42.00    1.09
   0   2  -2   44.58    1.10
   0   2  -2   42.64    1.77
   0   2   2   40.88    1.09
   2  -2   2  148.29    4.26
   2  -2   2  152.38    4.65
   2  -2   2  149.44    3.86
   2   2   2  164.95    4.74
  -2   2  -2  150.22    4.25
   2   2   2  163.39    4.33
   2   2   2  151.41    3.86
  -2   2  -2  148.16    3.86
  -2   2  -2  150.01    4.60
   4  -2   2   34.28    0.85
   4  -2   2   35.33    0.85
   4  -2   2   34.22    0.87
  -4  -2  -2   35.02    0.87
  -4  -2  -2   33.11    0.85
  -4  -2  -2   33.92    0.87
  -4  -2  -2   35.51    0.87
   4  -2   2   34.95    0.87
   4   2   2   32.15    0.86
  -4   2  -2   33.17    0.87
  -4   2  -2   31.94    0.85
   4   2   2   31.34    1.32
   4   2   2   32.40    0.85
  -4   2  -2   30.82    1.22
   4   2   2   32.16    0.86
   4   2   2   31.64    1.74
   4   2   2   33.12    1.82
   4   2   2   32.03    0.87
  -4   2  -2   30.70    1.52
   4   2   2   33.91    0.85
   4   2   2   32.12    1.35
  -4   2  -2   33.07    0.86
  -4   2  -2   32.71    0.87
  -4   2  -2   35.02    0.85
   6  -2   2  109.68    3.78
  -6  -2  -2  107.18    2.89
   6  -2   2  113.18    2.88
   6  -2   2  123.13    2.88
  -6  -2  -2  110.62    2.89
   6  -2   2  111.43    3.37
   6  -2   2  111.96    2.88
   6   2   2  109.12    2.89
   6   2   2  114.27    4.10
   6   2   2  112.49    3.51
   6   2   2  125.56    3.53
  -6   2  -2  120.47    3.86
  -6   2  -2  120.84    3.40
  -6   2  -2  107.99    2.89
  -6   2  -2  109.43    2.88
   6   2   2  123.22    4.09
  -6   2  -2  117.62    2.87
   6   2   2  110.54    2.89
  -6   2  -2  110.09    2.87
  -6   2  -2  109.93    2.89
   6   2   2  110.39    2.88
   8  -2   2   13.95    0.89
   8  -2   2   14.87    0.38
   8  -2   2   14.93    0.41
   8  -2   2   13.95    0.41
  -8  -2  -2   14.66    0.42
   8  -2   2   14.60    1.36
   8   2   2   14.91    0.41
  -8   2  -2   14.55    0.42
  -8   2  -2   15.15    0.38
   8   2   2   12.59    1.71
   8   2   2   13.41    1.05
   8   2   2   12.71    0.37
  -8   2  -2   15.01    0.40
  -8   2  -2   14.66    0.43
  -8   2  -2   15.49    0.38
  -8   2  -2   15.11    0.38
  -8   2  -2   13.69    0.87
  -8   2  -2   13.88    1.36
   8   2   2   14.45    0.42
 -10  -2  -2   19.22    0.56
  10  -2   2   18.50    1.75
  10  -2   2   19.15    0.54
 -10  -2  -2   19.91    0.56
  10  -2   2   19.84    0.54
  10  -2   2   19.41    1.14
 -10   2  -2   19.67    0.57
 -10   2  -2   19.39    1.72
  10   2   2   18.48    1.25
  10   2   2   20.22    0.55
 -10   2  -2   20.08    0.56
  10   2   2   21.69    1.37
  10   2   2   20.00    2.22
 -10   2  -2   20.07    0.54
  10   2   2   18.03    1.98
 -10   2  -2   20.77    0.52
  10   2   2   19.51    0.56
 -10   2  -2   19.13    1.12
 -10   2  -2   20.05    0.57
 -12  -2  -2   16.68    0.50
 -12  -2  -2   16.64    0.51
  12  -2   2   16.94    0.47
  12  -2   2   15.98    1.19
  12  -2   2   16.26    2.01
 -12   2  -2   17.28    1.22
  12   2   2   14.34    1.40
 -12   2  -2   16.97    0.50
  12   2   2   16.61    0.50
  12   2   2   16.75    0.49
 -12   2  -2   16.67    0.51
 -12   2  -2   17.12    0.45
  12   2   2   17.12    2.44
 -12   2  -2   16.58    0.50
  12   2   2   16.27    2.41
 -12   2  -2   16.65    0.47
 -12   2  -2   16.17    2.08
  12   2   2   17.91    1.41
  14  -2   2   20.40    0.54
 -14  -2  -2   19.51    0.58
 -14  -2  -2   18.86    0.58
 -14   2  -2   18.41    0.58
  14   2   2   19.27    0.56
 -14   2  -2   18.35    0.59
 -14   2  -2   19.10    0.59
 -14   2  -2   22.91    2.61
  14   2   2   19.10    0.59
 -14   2  -2   20.46    1.51
 -14   2  -2   19.20    0.55
 -14   2  -2   19.39    0.52
 -16  -2  -2    3.40    0.25
 -16  -2  -2    3.74    0.24
 -16  -2  -2    3.65    0.23
 -16  -2  -2    3.43    0.24
  16   2   2    3.85    0.22
 -16   2  -2    3.94    0.26
  16   2   2    3.74    0.25
 -16   2  -2    3.67    0.20
 -16   2  -2    3.51    0.24
 -16   2  -2    3.89    0.25
 -18  -2  -2    7.44    0.35
 -18  -2  -2    7.59    0.48
 -18  -2  -2    8.00    0.34
 -18  -2  -2    7.62    0.37
 -18   2  -2    7.38    0.39
 -18   2  -2    7.80    0.31
 -18   2  -2    7.79    0.35
 -18   2  -2    7.63    0.35
 -20  -2  -2    0.65    0.18
 -20  -2  -2    0.94    0.16
 -20  -2  -2    0.74    0.17
 -20  -2  -2    0.93    0.16
 -20   2  -2    0.57    0.16
 -20   2  -2    0.66    0.19
 -20   2  -2    0.65    0.17
  20   2   2    0.83    0.18
 -22  -2  -2    9.86    0.48
 -22  -2  -2   10.19    0.48
 -22  -2  -2    9.90    0.43
 -22  -2  -2    9.71    0.44
 -22  -2  -2    9.76    0.46
 -22   2  -2    9.45    0.45
 -22   2  -2    9.67    0.47
  22   2   2    9.40    0.47
 -22   2  -2    9.73    0.48
 -24  -2  -2   -0.04    0.15
 -25  -3   2    1.40    0.21
 -25  -3   2    1.69    0.23
 -25  -3   2    1.21    0.20
 -25   3   2    1.32    0.19
 -25   3   2    1.68    0.20
  25   3  -2    1.19    0.21
 -25   3   2    1.56    0.22
 -23  -3   2   17.08    0.62
 -23  -3   2   17.49    0.61
  23   3  -2   17.46    0.63
 -23   3   2   17.62    0.62
 -23   3   2   17.62    0.59
 -23   3   2   16.93    0.62
 -23   3   2   17.63    0.59
 -21  -3   2   11.88    0.46
 -21  -3   2   11.38    0.45
 -21   3   2   11.35    0.46
 -21   3   2   11.77    0.47
  21   3  -2   11.73    0.47
 -21   3   2   11.87    0.43
 -21   3   2   11.92    0.43
 -19  -3   2   -0.03    0.12
  19  -3  -2    0.06    0.11
 -19  -3   2    0.01    0.12
  19   3  -2    0.22    0.14
 -19   3   2    0.17    0.11
 -19   3   2   -0.02    0.12
 -19   3   2    0.14    0.10
 -19   3   2    0.09    0.16
 -17  -3   2    9.63    0.37
  17  -3  -2    9.34    0.80
  17  -3  -2    9.88    0.34
  17  -3  -2   10.06    1.53
 -17  -3   2    9.98    0.37
 -17  -3   2    9.92    0.28
 -17   3   2    9.28    0.36
 -17   3   2    9.97    0.28
 -17   3   2    9.62    0.38
  17   3  -2    9.78    0.37
 -17   3   2    9.34    0.34
 -17   3   2    9.33    0.37
  17   3  -2    9.67    0.31
 -15  -3   2   15.11    0.49
 -15  -3   2   14.98    0.48
  15  -3  -2   14.65    0.84
  15  -3  -2   15.54    0.46
 -15  -3   2   15.40    0.42
  15  -3  -2   13.82    1.39
  15   3  -2   17.91    2.48
  15   3  -2   15.48    0.49
 -15   3   2   15.50    0.46
  15   3  -2   15.58    2.39
  15   3  -2   12.03    1.26
  15   3  -2   15.55    1.37
 -15   3   2   15.40    0.49
 -15   3   2   15.85    0.42
 -15   3   2   15.79    0.46
  15   3  -2   15.97    0.44
 -15   3   2   14.07    1.20
 -15   3   2   15.38    0.48
 -15   3   2   15.69    0.79
 -13  -3   2    7.96    0.22
  13  -3  -2    7.51    0.27
 -13  -3   2    7.17    0.28
 -13  -3   2    7.52    0.29
 -13  -3   2    8.26    0.24
 -13  -3   2    8.19    0.24
 -13   3   2    7.81    0.22
 -13   3   2    7.39    1.14
 -13   3   2    7.82    0.25
  13   3  -2    7.47    0.29
 -13   3   2    7.85    0.27
  13   3  -2    7.58    1.03
 -13   3   2    7.67    0.29
  13   3  -2    7.86    0.27
 -13   3   2    8.35    0.81
  13   3  -2    6.82    1.42
 -13   3   2    7.61    0.28
  13   3  -2    7.70    0.24
 -11  -3   2  113.66    3.05
 -11  -3   2  119.53    4.51
 -11  -3   2  119.95    3.02
 -11  -3   2  122.84    3.81
 -11  -3   2  117.56    3.05
  11  -3  -2  117.11    3.34
 -11  -3   2  120.01    3.03
  11  -3  -2  122.25    3.70
  11   3  -2  118.87    3.03
 -11   3   2  125.60    3.35
  11   3  -2  119.62    3.00
 -11   3   2  116.79    3.06
 -11   3   2  126.66    3.70
 -11   3   2  116.46    3.01
  11   3  -2  120.10    4.50
  11   3  -2  119.11    3.06
  11   3  -2  121.36    3.81
 -11   3   2  117.16    3.03
 -11   3   2  116.20    3.05
  -9  -3   2   96.95    2.46
   9  -3  -2  102.28    3.15
  -9  -3   2   97.72    2.47
   9  -3  -2   95.27    2.48
  -9  -3   2   98.20    2.45
   9  -3  -2   94.54    2.45
  -9  -3   2   84.63    2.50
   9  -3  -2   98.76    2.79
  -9   3   2   96.85    2.47
  -9   3   2   97.75    2.46
   9   3  -2   97.41    2.45
   9   3  -2   97.03    3.73
   9   3  -2   98.31    3.15
   9   3  -2   95.91    2.47
  -9   3   2  102.16    3.12
  -9   3   2   98.65    2.45
  -9   3   2  101.52    2.79
   9   3  -2   90.59    2.50
   9   3  -2   97.89    2.46
  -9   3   2   97.40    2.48
  -7  -3   2   16.70    1.63
  -7  -3   2   21.02    0.54
  -7  -3   2   20.38    0.55
  -7  -3   2   20.93    0.53
   7  -3  -2   20.93    0.53
  -7  -3   2   19.76    1.12
  -7  -3   2   21.51    0.53
   7  -3  -2   19.29    1.16
   7  -3  -2   19.44    0.85
  -7  -3   2   20.17    0.56
   7  -3  -2   20.20    0.56
   7   3  -2   20.46    1.09
  -7   3   2   19.72    0.55
   7   3  -2   20.93    0.54
  -7   3   2   20.18    0.55
  -7   3   2   19.66    0.55
  -7   3   2   21.12    0.53
  -7   3   2   21.17    0.53
   7   3  -2   20.76    0.53
  -7   3   2   20.55    0.56
   7   3  -2   20.21    0.56
  -7   3   2   19.76    0.88
   7   3  -2   18.61    1.52
   7   3  -2   19.94    0.55
  -7   3   2   20.68    1.24
  -5  -3   2   92.97    2.46
   5  -3  -2   94.47    3.16
  -5  -3   2   95.02    2.45
   5  -3  -2   99.93    2.84
  -5  -3   2   93.63    2.46
  -5  -3   2  101.02    3.59
  -5  -3   2   95.78    2.46
   5  -3  -2   93.54    2.45
  -5  -3   2  101.05    3.06
  -5  -3   2   97.55    2.45
   5  -3  -2   94.53    2.47
  -5   3   2   93.71    2.46
   5   3  -2  101.08    3.56
   5   3  -2   94.42    2.47
   5   3  -2   97.27    2.47
  -5   3   2   95.76    2.46
  -5   3   2  101.69    3.21
   5   3  -2   95.57    2.46
  -5   3   2   94.01    2.46
  -5   3   2   98.64    2.47
  -5   3   2  100.26    2.84
  -5   3   2   98.60    2.48
   5   3  -2   96.38    2.46
   5   3  -2  100.86    3.03
  -5   3   2   98.30    2.45
  -3  -3   2  383.02   10.99
  -3  -3   2  380.12   10.47
   3  -3  -2  400.01   10.36
   3  -3  -2  405.78   10.76
  -3   3   2  399.71   10.77
  -3   3   2  399.83   10.36
   3   3  -2  392.73   10.98
   3   3  -2  398.38   10.48
   1  -3  -2   47.71    1.23
   1  -3  -2   45.72    1.21
   1  -3  -2   50.40    1.22
   1  -3  -2   47.59    1.20
  -1  -3   2   48.74    1.21
   1  -3  -2   49.26    2.11
   1  -3  -2   46.19    1.22
   1  -3  -2   50.86    1.70
  -1  -3   2   48.53    1.23
   1  -3  -2   46.37    1.22
  -1  -3   2   47.92    2.21
  -1  -3   2   47.99    1.23
  -1  -3   2   50.96    1.76
  -1  -3   2   47.18    1.22
   1   3  -2   47.30    1.22
   1   3  -2   45.49    1.70
  -1   3   2   47.68    1.22
  -1   3   2   46.74    1.22
   1   3  -2   47.33    1.23
   1   3  -2   47.34    1.23
   1   3  -2   43.40    2.07
  -1   3   2   49.70    1.21
  -1   3   2   46.46    2.04
  -1   3   2   46.07    1.23
  -1   3   2   46.37    1.65
  -1   3   2   46.41    1.21
   1   3  -2   47.23    1.22
   1   3  -2   47.66    1.22
  -1   3   2   47.02    1.22
   1   3  -2   47.97    1.22
   1  -3   2   17.68    0.46
  -1  -3  -2   17.51    1.44
  -1  -3  -2   16.86    0.47
  -1  -3  -2   15.79    0.94
  -1  -3  -2   16.90    0.47
   1  -3   2   17.49    0.45
   1  -3   2   14.60    1.37
   1  -3   2   16.11    0.48
   1  -3   2   17.46    0.48
   1  -3   2   15.44    0.92
  -1  -3  -2   17.19    0.46
  -1  -3  -2   17.63    0.46
  -1  -3  -2   17.28    0.47
   1  -3   2   17.51    0.47
  -1  -3  -2   17.13    0.47
   1   3   2   17.77    0.48
   1   3   2   18.64    0.46
   1   3   2   17.84    0.47
  -1   3  -2   17.24    1.29
  -1   3  -2   18.11    0.48
   1   3   2   18.41    0.47
  -1   3  -2   17.99    0.93
   1   3   2   16.45    1.31
   1   3   2   17.77    0.95
   1   3   2   18.27    0.47
  -1   3  -2   18.27    0.47
  -3  -3  -2   11.62    0.32
  -3  -3  -2   11.01    1.40
   3  -3   2   11.94    0.81
   3  -3   2   12.18    1.29
  -3  -3  -2   11.33    0.32
  -3  -3  -2   11.82    0.33
   3  -3   2   11.94    0.31
  -3  -3  -2   11.06    0.85
   3  -3   2   11.47    0.34
   3  -3   2   11.52    0.33
   3  -3   2   11.60    0.34
  -3  -3  -2   11.74    0.33
  -3  -3  -2   11.42    0.33
   3   3   2   12.01    0.33
   3   3   2   11.70    0.34
  -3   3  -2   11.31    0.75
  -3   3  -2   11.35    0.34
   3   3   2   13.03    1.33
  -3   3  -2   11.81    0.33
  -3   3  -2   11.72    0.34
   3   3   2   11.97    0.33
   3   3   2   11.70    0.34
   3   3   2   11.08    0.33
  -3   3  -2   11.35    1.12
   3   3   2   12.11    0.86
  -5  -3  -2   22.33    0.59
   5  -3   2   23.08    0.60
   5  -3   2   23.10    0.58
  -5  -3  -2   22.72    0.61
   5  -3   2   22.36    0.61
  -5  -3  -2   23.40    0.61
   5  -3   2   23.63    0.62
  -5  -3  -2   22.99    0.61
  -5  -3  -2   21.79    0.60
  -5   3  -2   22.10    0.61
   5   3   2   23.43    0.59
   5   3   2   21.99    0.61
  -5   3  -2   22.83    0.62
  -5   3  -2   21.90    0.61
   5   3   2   22.44    0.61
  -5   3  -2   20.26    1.23
   5   3   2   23.78    1.80
  -5   3  -2   19.50    1.76
   5   3   2   22.96    1.23
   5   3   2   22.90    0.59
   5   3   2   22.45    0.61
   5   3   2   21.53    0.60
  -5   3  -2   22.74    0.60
  -7  -3  -2   30.93    0.86
   7  -3   2   31.41    0.86
   7  -3   2   32.59    0.84
   7  -3   2   32.26    0.84
   7  -3   2   29.12    1.39
  -7  -3  -2   31.86    0.83
  -7  -3  -2   30.46    0.87
   7  -3   2   30.47    1.94
   7  -3   2   32.59    0.86
  -7   3  -2   32.64    0.87
   7   3   2   32.79    0.86
  -7   3  -2   31.98    0.87
  -7   3  -2   33.74    1.44
  -7   3  -2   31.48    1.94
   7   3   2   32.80    0.87
   7   3   2   30.51    1.61
  -7   3  -2   32.59    0.87
   7   3   2   35.39    2.31
   7   3   2   35.00    0.83
  -7   3  -2   32.50    0.86
   7   3   2   32.59    0.86
   7   3   2   33.53    0.83
  -7   3  -2   32.36    0.83
   7   3   2   31.95    2.39
   7   3   2   33.92    1.61
   9  -3   2   69.17    1.80
   9  -3   2   68.93    3.13
   9  -3   2   70.21    1.77
   9  -3   2   69.04    2.48
  -9  -3  -2   70.66    1.81
  -9  -3  -2   69.96    1.81
   9  -3   2   68.58    1.82
   9   3   2   70.84    1.81
   9   3   2   70.55    1.81
   9   3   2   67.59    3.66
   9   3   2   75.06    3.58
  -9   3  -2   69.40    3.08
   9   3   2   66.32    2.72
  -9   3  -2   67.24    1.81
   9   3   2   74.18    2.72
  -9   3  -2   68.76    1.81
  -9   3  -2   68.36    1.78
  -9   3  -2   68.68    1.81
   9   3   2   69.96    1.80
  -9   3  -2   70.85    2.46
 -11  -3  -2   11.17    0.38
 -11  -3  -2   10.55    0.37
  11  -3   2   11.93    0.36
  11  -3   2   10.94    1.59
  11  -3   2   11.01    1.11
 -11   3  -2   11.65    1.05
 -11   3  -2   11.49    0.38
  11   3   2   10.67    2.17
 -11   3  -2   11.68    0.33
 -11   3  -2   11.19    0.39
  11   3   2   12.18    1.48
  11   3   2   10.93    1.31
 -11   3  -2   11.35    0.38
 -11   3  -2   11.56    0.37
  11   3   2   14.58    2.14
 -11   3  -2   12.16    0.30
  11   3   2   11.35    0.37
 -11   3  -2   11.79    1.87
  11   3   2   11.28    0.36
  13  -3   2    9.12    0.30
 -13  -3  -2    8.54    0.33
 -13  -3  -2    8.99    0.33
  13   3   2    8.90    0.31
 -13   3  -2    8.62    0.32
 -13   3  -2    8.73    0.27
  13   3   2    8.17    0.33
  13   3   2    9.74    1.47
 -13   3  -2    8.45    0.33
  13   3   2   14.31    2.31
 -13   3  -2    9.40    1.60
 -13   3  -2    8.17    0.34
 -13   3  -2    8.76    1.17
 -15  -3  -2   10.07    0.39
  15  -3   2   10.83    0.36
 -15  -3  -2   10.48    0.39
 -15  -3  -2   10.29    0.39
  15   3   2   10.71    0.39
 -15   3  -2   10.54    0.40
  15   3   2   10.23    0.37
 -15   3  -2   10.21    0.40
 -15   3  -2   10.61    0.38
 -15   3  -2   11.29    0.34
 -17  -3  -2   32.09    0.91
  17   3   2   32.64    0.92
  17   3   2   30.40    0.89
 -17   3  -2   30.72    0.91
 -17   3  -2   32.06    0.93
 -17   3  -2   31.87    0.91
 -19  -3  -2    1.34    0.18
 -19  -3  -2    1.16    0.18
 -19  -3  -2    1.21    0.17
 -19  -3  -2    1.20    0.17
 -19   3  -2    1.04    0.16
 -19   3  -2    1.56    0.18
 -19   3  -2    1.13    0.19
  19   3   2    1.54    0.19
 -19   3  -2    1.31    0.18
 -21  -3  -2    2.30    0.32
 -21  -3  -2    1.76    0.22
 -21  -3  -2    2.44    0.30
 -21  -3  -2    1.89    0.24
 -21   3  -2    2.34    0.32
 -21   3  -2    2.45    0.33
 -21   3  -2    2.32    0.31
  21   3   2    2.50    0.32
 -21   3  -2    2.31    0.31
 -23  -3  -2    2.18    0.30
 -23  -3  -2    2.89    0.42
 -23   3  -2    2.47    0.31
 -24  -4   2    4.61    0.37
 -24  -4   2    5.26    0.40
 -24   4   2    4.55    0.39
 -24   4   2    5.02    0.35
 -24   4   2    5.39    0.38
  24   4  -2    4.16    0.38
 -22  -4   2   17.54    0.62
 -22  -4   2   17.97    0.64
  22   4  -2   17.47    0.63
 -22   4   2   18.02    0.60
 -22   4   2   17.23    0.63
 -22   4   2   17.57    0.63
 -22   4   2   17.95    0.58
 -20  -4   2    0.72    0.16
  20  -4  -2    1.25    0.16
 -20  -4   2    0.96    0.17
 -20   4   2    0.95    0.16
  20   4  -2    1.25    0.18
 -20   4   2    0.96    0.17
 -20   4   2    1.04    0.15
 -20   4   2    0.97    0.16
  18  -4  -2    7.64    0.34
 -18  -4   2    8.07    0.35
 -18  -4   2    8.14    0.36
 -18   4   2    8.70    0.56
 -18   4   2    8.02    0.34
  18   4  -2    8.26    0.30
  18   4  -2    7.71    0.36
 -18   4   2    8.02    0.31
 -18   4   2    8.05    0.35
  16  -4  -2   67.72    2.90
  16  -4  -2   66.85    2.18
 -16  -4   2   66.32    1.77
 -16  -4   2   68.25    1.72
  16  -4  -2   66.44    1.75
 -16  -4   2   66.28    1.77
 -16   4   2   65.73    2.09
 -16   4   2   66.21    2.61
  16   4  -2   66.62    1.77
 -16   4   2   67.73    1.75
 -16   4   2   63.96    1.77
  16   4  -2   66.82    1.72
 -16   4   2   64.94    1.76
 -16   4   2   66.73    1.73
  14  -4  -2   39.82    1.53
  14  -4  -2   40.95    2.20
 -14  -4   2   38.56    1.07
  14  -4  -2   40.41    1.07
 -14  -4   2   41.04    1.01
 -14  -4   2   38.94    1.07
 -14  -4   2   38.93    1.03
 -14   4   2   37.13    1.06
 -14   4   2   39.35    1.06
 -14   4   2   39.35    1.47
 -14   4   2   38.03    1.07
 -14   4   2   39.75    2.03
  14   4  -2   38.91    1.03
  14   4  -2   37.91    3.33
  14   4  -2   37.45    2.13
  14   4  -2   38.52    1.06
  14   4  -2   38.23    1.07
 -12  -4   2   29.03    1.81
 -12  -4   2   30.88    0.87
  12  -4  -2   32.91    1.33
 -12  -4   2   31.49    0.87
  12  -4  -2   31.19    1.91
 -12  -4   2   32.33    0.85
 -12  -4   2   32.40    0.88
 -12  -4   2   28.08    2.91
  12  -4  -2   31.50    0.88
  12   4  -2   32.48    0.84
  12   4  -2   31.23    0.87
 -12   4   2   32.86    1.30
  12   4  -2   32.42    0.88
  12   4  -2   34.48    1.88
 -12   4   2   33.20    1.81
  12   4  -2   32.30    2.91
 -12   4   2   31.03    0.86
 -12   4   2   30.71    0.87
 -12   4   2   32.04    0.84
 -12   4   2   31.08    0.88
  10  -4  -2   73.28    1.92
  10  -4  -2   72.87    2.88
  10  -4  -2   74.92    2.37
 -10  -4   2   73.28    1.88
 -10  -4   2   73.66    1.90
 -10  -4   2   70.22    2.74
  10  -4  -2   71.86    1.86
 -10  -4   2   74.50    1.91
 -10   4   2   73.28    1.90
 -10   4   2   77.87    2.38
  10   4  -2   74.74    1.92
  10   4  -2   76.67    1.89
  10   4  -2   70.64    2.76
 -10   4   2   72.77    1.91
  10   4  -2   72.96    1.91
  10   4  -2   67.94    3.57
 -10   4   2   76.79    2.86
 -10   4   2   74.83    1.90
 -10   4   2   74.52    1.86
 -10   4   2   74.07    1.87
 -10   4   2   72.37    1.91
  10   4  -2   73.12    1.90
  -8  -4   2   53.42    1.41
  -8  -4   2   53.49    1.38
   8  -4  -2   54.03    1.37
   8  -4  -2   54.56    1.41
   8  -4  -2   52.50    1.87
  -8  -4   2   50.91    3.10
   8  -4  -2   54.15    2.37
  -8  -4   2   54.65    1.39
  -8   4   2   54.04    1.40
   8   4  -2   53.83    2.18
   8   4  -2   53.12    1.41
  -8   4   2   52.05    1.42
   8   4  -2   59.46    3.02
   8   4  -2   53.36    1.41
   8   4  -2   53.70    1.39
   8   4  -2   52.87    1.41
  -8   4   2   55.35    2.38
  -8   4   2   54.39    1.37
  -8   4   2   55.71    1.37
  -8   4   2   53.99    1.41
  -8   4   2   56.60    1.89
  -8   4   2   49.60    1.44
  -6  -4   2   15.54    1.83
  -6  -4   2   12.55    1.12
  -6  -4   2   14.28    0.41
  -6  -4   2   14.27    0.41
   6  -4  -2   14.11    0.38
  -6  -4   2   13.91    0.41
  -6  -4   2   14.32    0.39
   6  -4  -2   13.56    1.33
  -6   4   2   15.00    0.37
   6   4  -2   12.16    1.68
   6   4  -2   14.70    0.39
   6   4  -2   14.32    0.40
   6   4  -2   16.12    1.08
  -6   4   2   14.57    0.38
  -6   4   2   14.15    0.41
  -6   4   2   14.85    0.41
  -6   4   2   13.96    0.41
   6   4  -2   13.83    0.41
  -6   4   2   14.07    1.41
  -6   4   2   13.80    0.41
  -6   4   2   13.72    0.90
   6   4  -2   14.54    0.42
  -4  -4   2  121.35    3.11
   4  -4  -2  125.78    3.67
  -4  -4   2  122.81    3.11
  -4  -4   2  121.78    3.11
   4  -4  -2  116.29    3.12
  -4  -4   2  121.64    3.10
   4  -4  -2  122.71    3.09
   4  -4  -2  123.59    4.17
  -4  -4   2  132.91    3.90
  -4  -4   2  130.82    4.62
   4  -4  -2  122.54    3.11
   4   4  -2  119.11    3.11
  -4   4   2  119.82    3.11
  -4   4   2  121.71    3.11
   4   4  -2  121.26    3.10
  -4   4   2  121.55    3.12
   4   4  -2  116.62    3.09
  -4   4   2  131.04    3.70
  -4   4   2  129.21    4.23
   4   4  -2  117.48    3.11
   4   4  -2  122.93    4.46
   4   4  -2  119.58    3.11
   4   4  -2  122.23    3.82
  -4   4   2  118.93    3.10
  -4   4   2  119.44    3.11
   2  -4  -2   58.29    1.49
  -2  -4   2   58.78    1.51
  -2  -4   2   57.71    1.49
  -2  -4   2   57.88    1.50
  -2  -4   2   57.79    1.50
   2  -4  -2   58.90    2.65
   2  -4  -2   58.28    1.51
  -2  -4   2   55.45    2.18
  -2  -4   2   57.11    2.86
   2  -4  -2   57.68    1.49
   2  -4  -2   56.74    1.50
   2  -4  -2   59.69    2.10
   2   4  -2   55.96    2.13
  -2   4   2   57.70    1.50
   2   4  -2   58.44    1.50
   2   4  -2   57.85    1.49
  -2   4   2   63.07    2.09
  -2   4   2   57.09    1.49
  -2   4   2   56.84    1.50
  -2   4   2   60.56    1.50
   2   4  -2   58.58    1.50
  -2   4   2   59.84    1.48
   2   4  -2   57.00    1.50
   2   4  -2   58.32    1.51
   2   4  -2   58.55    2.77
  -2   4   2   61.33    2.59
  -2   4   2   56.27    1.51
   0  -4  -2    8.83    0.87
   0  -4  -2    8.88    0.28
   0  -4  -2    9.00    0.26
   0  -4   2    8.94    0.28
   0  -4   2    9.30    0.25
   0  -4  -2    9.22    0.28
   0  -4   2    9.55    1.55
   0  -4  -2    9.88    1.56
   0  -4   2    9.12    0.29
   0  -4   2    8.83    0.28
   0  -4   2    7.70    0.86
   0  -4  -2    8.43    0.27
   0  -4  -2    9.13    0.24
   0   4   2    7.94    1.26
   0   4  -2    9.05    0.27
   0   4  -2    8.96    0.28
   0   4  -2    9.22    0.81
   0   4  -2    9.19    0.26
   0   4   2    7.90    0.76
   0   4   2    9.30    0.26
   0   4   2    9.03    0.28
   0   4   2    9.09    0.28
   0   4   2    9.67    0.27
   0   4   2    9.17    0.28
   0   4  -2    9.33    0.27
   0   4  -2    8.05    1.34
   0   4  -2    8.76    0.28
   0   4  -2    9.02    0.28
  -2  -4  -2   68.72    1.81
  -2  -4  -2   71.06    1.79
  -2  -4  -2   70.36    3.26
   2  -4   2   75.90    2.53
   2  -4   2   73.50    3.20
   2  -4   2   68.21    1.77
   2  -4   2   69.29    1.82
  -2  -4  -2   70.71    2.54
   2  -4   2   71.06    1.78
  -2  -4  -2   68.77    1.80
  -2  -4  -2   70.61    1.81
   2  -4   2   71.75    1.78
   2  -4   2   70.24    1.81
   2  -4   2   70.49    1.81
  -2  -4  -2   69.36    1.81
  -2   4  -2   70.74    1.80
  -2   4  -2   74.47    2.47
   2   4   2   69.46    1.81
   2   4   2   68.55    1.81
  -2   4  -2   68.64    1.81
  -2   4  -2   68.76    1.82
   2   4   2   71.42    1.81
   2   4   2   70.80    3.12
   2   4   2   73.84    2.53
   2   4   2   68.75    1.80
   2   4   2   69.28    1.81
  -2   4  -2   69.15    2.99
  -4  -4  -2  106.77    2.78
  -4  -4  -2  107.47    2.77
   4  -4   2  113.55    2.82
  -4  -4  -2  103.15    4.30
  -4  -4  -2  106.47    3.57
   4  -4   2  107.26    2.78
   4  -4   2  109.56    2.77
  -4  -4  -2  106.93    2.77
  -4  -4  -2  109.62    2.78
   4  -4   2  110.46    3.49
   4  -4   2  113.18    2.75
   4  -4   2  106.22    4.15
   4   4   2  112.68    3.61
  -4   4  -2  106.16    2.78
   4   4   2  107.18    2.77
   4   4   2  107.64    2.78
  -4   4  -2  112.04    2.77
   4   4   2  112.34    4.34
   4   4   2  107.24    2.78
  -4   4  -2  107.35    2.79
  -4   4  -2  116.18    4.11
   4   4   2  106.22    2.78
  -4   4  -2  111.33    3.46
   6  -4   2    8.90    1.29
  -6  -4  -2    8.89    0.30
   6  -4   2    9.00    0.27
   6  -4   2    8.56    0.30
  -6  -4  -2    9.11    0.28
   6  -4   2    8.97    0.30
  -6  -4  -2    9.29    0.26
   6  -4   2    9.14    0.25
  -6  -4  -2    8.89    0.30
   6  -4   2    9.94    0.88
  -6   4  -2    9.30    0.28
   6   4   2    8.64    0.32
  -6   4  -2    7.43    1.24
   6   4   2    9.13    0.29
   6   4   2    9.30    0.30
   6   4   2    9.32    0.28
   6   4   2    8.33    1.03
   6   4   2    9.62    1.50
  -6   4  -2    9.02    0.31
  -6   4  -2    8.65    0.30
  -6   4  -2    8.00    0.84
   8  -4   2   43.50    1.14
  -8  -4  -2   43.72    1.13
   8  -4   2   43.96    1.18
   8  -4   2   48.57    1.15
   8  -4   2   47.17    2.72
  -8  -4  -2   43.43    1.18
   8  -4   2   41.46    1.87
   8  -4   2   43.99    1.17
  -8  -4  -2   43.38    1.17
  -8  -4  -2   42.49    1.17
  -8   4  -2   44.63    1.16
   8   4   2   45.02    2.21
   8   4   2   45.77    3.16
  -8   4  -2   43.73    1.87
   8   4   2   46.09    3.36
  -8   4  -2   44.77    1.19
  -8   4  -2   42.43    1.18
   8   4   2   45.29    1.13
   8   4   2   47.74    2.19
  -8   4  -2   42.92    1.18
   8   4   2   44.06    1.18
   8   4   2   44.73    1.17
   8   4   2   43.54    1.17
  -8   4  -2   39.87    2.53
 -10  -4  -2   34.84    0.95
  10  -4   2   35.19    0.91
 -10  -4  -2   35.39    0.96
  10  -4   2   34.85    1.77
 -10  -4  -2   34.49    0.96
  10  -4   2   35.83    0.96
  10  -4   2   30.91    2.66
 -10   4  -2   35.05    0.96
  10   4   2   34.86    0.96
 -10   4  -2   36.13    1.80
 -10   4  -2   35.68    2.75
  10   4   2   29.50    3.72
 -10   4  -2   34.80    0.96
  10   4   2   37.95    2.11
  10   4   2   35.35    0.95
  10   4   2   34.89    0.95
  10   4   2   34.84    2.21
 -10   4  -2   34.84    0.97
  10   4   2   29.98    3.24
 -10   4  -2   35.95    0.94
 -12  -4  -2   24.02    0.69
 -12  -4  -2   23.48    0.70
 -12  -4  -2   23.42    0.70
  12  -4   2   23.90    0.69
 -12   4  -2   24.12    0.63
 -12   4  -2   23.08    0.71
 -12   4  -2   24.32    0.70
 -12   4  -2   23.69    0.71
 -12   4  -2   24.34    0.68
  12   4   2   24.39    0.68
  12   4   2   20.92    3.45
  12   4   2   23.98    2.01
  12   4   2   24.70    0.70
  12   4   2   24.58    0.70
 -14  -4  -2    8.44    0.36
 -14  -4  -2    8.98    0.35
  14  -4   2    9.10    0.34
 -14  -4  -2    8.45    0.35
 -14   4  -2    8.52    0.35
  14   4   2    9.02    0.34
 -14   4  -2    9.15    0.36
 -14   4  -2    9.15    0.33
  14   4   2    8.76    0.35
 -14   4  -2    8.54    0.37
 -16  -4  -2   26.54    0.78
  16  -4   2   26.88    0.76
 -16  -4  -2   24.26    0.88
  16   4   2   26.51    0.78
 -16   4  -2   26.00    0.76
 -16   4  -2   25.20    0.84
  16   4   2   26.04    0.75
 -16   4  -2   25.05    0.89
 -16   4  -2   25.89    0.79
 -18  -4  -2    0.90    0.18
 -18  -4  -2    1.09    0.17
 -18  -4  -2    0.73    0.17
 -18   4  -2    1.04    0.17
  18   4   2    1.20    0.17
 -18   4  -2    0.99    0.16
  18   4   2    0.78    0.16
 -18   4  -2    1.02    0.19
 -20  -4  -2    7.62    0.42
 -20  -4  -2    7.86    0.41
 -20  -4  -2    8.05    0.44
 -20  -4  -2    7.48    0.41
 -20   4  -2    8.01    0.39
  20   4   2    7.72    0.41
 -20   4  -2    7.87    0.40
 -20   4  -2    7.49    0.43
 -20   4  -2    7.27    0.44
  20   4   2    8.19    0.42
 -22  -4  -2    5.05    0.36
 -22  -4  -2    4.01    0.52
 -22  -4  -2    4.80    0.37
 -22   4  -2    5.42    0.36
  22   4   2    5.43    0.41
 -22   4  -2    5.27    0.38
 -23  -5   2    1.51    0.22
 -23  -5   2    1.74    0.22
 -23   5   2    1.61    0.22
 -23   5   2    1.53    0.19
 -23   5   2    1.53    0.31
 -23   5   2    1.69    0.20
  23   5  -2    1.08    0.20
 -21  -5   2    2.37    0.33
 -21  -5   2    3.28    0.32
 -21   5   2    2.98    0.33
  21   5  -2    2.79    0.31
 -21   5   2    2.92    0.28
 -21   5   2    2.61    0.26
 -21   5   2    3.02    0.32
 -19  -5   2    0.78    0.16
  19  -5  -2    0.82    0.17
 -19  -5   2    1.06    0.18
 -19   5   2    0.73    0.17
  19   5  -2    0.78    0.16
 -19   5   2    0.88    0.17
 -19   5   2    0.67    0.15
 -17  -5   2   29.58    0.84
  17  -5  -2   28.82    0.83
 -17  -5   2   29.74    0.79
 -17   5   2   27.38    0.82
  17   5  -2   27.79    0.79
  17   5  -2   28.41    0.83
 -17   5   2   25.91    0.85
 -17   5   2   28.38    0.84
 -17   5   2   28.60    0.81
  17   5  -2   27.92    0.85
 -15  -5   2   24.12    0.71
 -15  -5   2   23.27    0.65
  15  -5  -2   22.95    0.69
 -15  -5   2   22.99    0.69
 -15   5   2   22.01    0.69
  15   5  -2   22.76    0.64
  15   5  -2   22.79    0.68
 -15   5   2   21.83    0.66
  15   5  -2   22.77    0.69
 -15   5   2   22.97    0.67
 -15   5   2   22.60    0.63
 -15   5   2   22.14    0.68
  13  -5  -2    8.53    1.56
 -13  -5   2    8.26    0.33
 -13  -5   2    8.69    0.26
 -13  -5   2    8.43    0.33
  13  -5  -2    8.03    1.07
  13  -5  -2    8.53    0.34
 -13  -5   2    3.43    1.95
 -13  -5   2   10.39    1.64
 -13  -5   2    8.69    0.30
 -13   5   2    8.14    1.28
  13   5  -2    6.47    2.06
 -13   5   2    8.40    0.35
 -13   5   2    8.37    0.34
 -13   5   2    8.05    0.31
 -13   5   2    8.51    0.26
  13   5  -2    8.66    0.29
  13   5  -2    8.68    0.33
  13   5  -2   10.25    1.53
  13   5  -2    8.47    0.34
 -13   5   2    8.66    0.33
 -13   5   2    8.91    0.31
 -13   5   2    8.71    0.95
 -11  -5   2   10.23    0.36
 -11  -5   2    8.97    1.60
 -11  -5   2   10.12    2.26
  11  -5  -2   10.73    0.37
 -11  -5   2   10.08    0.36
  11  -5  -2   10.57    1.50
 -11  -5   2   10.71    0.32
  11  -5  -2   10.09    1.03
 -11  -5   2   10.20    0.34
 -11   5   2   11.01    0.30
 -11   5   2   10.69    0.37
  11   5  -2   10.11    2.35
 -11   5   2    9.51    0.99
 -11   5   2   10.45    0.36
  11   5  -2   11.23    0.33
 -11   5   2   10.12    0.37
  11   5  -2   10.26    0.37
  11   5  -2   10.30    0.36
 -11   5   2   10.45    0.36
  11   5  -2   10.75    0.37
 -11   5   2    9.72    1.37
 -11   5   2   10.47    0.35
  11   5  -2    9.14    1.47
  -9  -5   2   34.55    2.08
   9  -5  -2   35.92    0.98
  -9  -5   2   36.55    0.97
   9  -5  -2   34.95    2.37
   9  -5  -2   36.43    0.91
  -9  -5   2   29.75    3.16
   9  -5  -2   38.99    1.65
  -9  -5   2   35.83    0.94
  -9  -5   2   35.79    0.96
  -9   5   2   35.38    0.91
   9   5  -2   34.85    0.94
  -9   5   2   35.95    0.96
   9   5  -2   34.72    0.97
   9   5  -2   34.34    0.96
  -9   5   2   35.37    0.98
  -9   5   2   35.51    0.97
   9   5  -2   35.77    0.97
  -9   5   2   34.71    0.96
   9   5  -2   34.56    3.10
  -9   5   2   34.76    1.60
  -9   5   2   33.66    0.96
  -9   5   2   36.78    2.35
   9   5  -2   37.75    2.02
  -7  -5   2    2.28    0.15
   7  -5  -2    1.33    0.98
   7  -5  -2    2.40    0.17
  -7  -5   2    2.39    0.15
   7  -5  -2    2.35    0.09
  -7  -5   2    2.50    0.15
   7  -5  -2    2.61    0.56
  -7  -5   2    2.67    0.87
  -7  -5   2    2.65    1.64
  -7   5   2    2.26    0.18
   7   5  -2    2.15    0.14
  -7   5   2    2.21    0.16
   7   5  -2    2.01    0.72
   7   5  -2    2.02    0.16
  -7   5   2    1.77    0.54
  -7   5   2    2.22    0.15
   7   5  -2    2.21    0.16
   7   5  -2    3.79    1.47
   7   5  -2    2.21    0.16
  -7   5   2    2.14    1.07
  -7   5   2    2.24    0.16
  -5  -5   2   29.75    0.83
   5  -5  -2   30.73    0.80
  -5  -5   2   28.25    1.76
   5  -5  -2   30.44    0.84
   5  -5  -2   32.76    2.17
  -5  -5   2   29.06    0.84
  -5  -5   2   31.30    0.82
   5  -5  -2   32.42    1.51
  -5  -5   2   31.03    2.78
  -5  -5   2   31.03    0.82
  -5   5   2   30.36    0.83
   5   5  -2   32.08    1.68
   5   5  -2   31.01    0.84
   5   5  -2   29.12    0.82
  -5   5   2   31.87    0.82
   5   5  -2   30.17    0.81
  -5   5   2   31.09    0.85
  -5   5   2   32.32    1.51
  -5   5   2   30.77    0.83
   5   5  -2   31.76    2.53
   5   5  -2   30.53    0.83
  -5   5   2   31.16    2.19
   5   5  -2   30.85    0.84
  -5   5   2   30.15    0.83
   3  -5  -2   11.46    0.36
  -3  -5   2    9.83    0.38
   3  -5  -2   11.43    0.35
  -3  -5   2   12.80    2.21
   3  -5  -2   11.09    0.32
  -3  -5   2   11.52    0.36
   3  -5  -2   11.54    0.30
  -3  -5   2   11.11    0.33
  -3  -5   2   10.14    1.25
   3  -5  -2   11.66    1.62
  -3  -5   2   11.25    0.35
   3  -5  -2   12.56    1.08
  -3   5   2   13.54    1.56
  -3   5   2   11.37    0.33
  -3   5   2   10.86    0.35
   3   5  -2   11.05    0.35
  -3   5   2   11.26    0.36
   3   5  -2   10.72    0.35
   3   5  -2   11.23    1.87
  -3   5   2   11.74    0.35
  -3   5   2   10.78    0.90
   3   5  -2   11.00    0.33
   3   5  -2   11.51    0.34
   3   5  -2   11.47    1.08
   3   5  -2   11.30    0.36
   1  -5  -2    0.02    0.03
  -1  -5   2   -0.05    0.07
   1  -5  -2    0.00    0.02
   1  -5  -2   -0.05    0.06
  -1  -5   2   -0.06    0.06
  -1  -5   2   -0.47    1.23
   1  -5  -2   -0.34    1.20
   1  -5  -2   -0.02    0.05
  -1  -5   2    0.03    0.04
  -1  -5   2    0.05    0.06
  -1  -5   2   -0.52    0.59
   1  -5  -2    0.01    0.04
   1  -5  -2   -0.03    0.07
  -1   5   2   -0.10    0.07
   1   5  -2    0.00    0.06
  -1   5   2    0.37    0.45
  -1   5   2   -0.50    0.91
   1   5  -2    0.15    0.07
  -1   5   2    0.17    0.07
   1   5  -2    0.29    0.97
   1   5  -2    0.04    0.05
  -1   5   2    0.07    0.05
   1   5  -2   -0.03    0.08
   1   5  -2    0.15    0.49
   1   5  -2   -0.02    0.07
  -1   5   2   -0.01    0.06
  -1   5   2    0.10    0.07
   1  -5   2   34.77    2.70
   1  -5   2   33.08    0.85
  -1  -5  -2   33.51    0.89
  -1  -5  -2   34.48    2.70
   1  -5   2   32.18    0.85
   1  -5   2   33.28    0.89
   1  -5   2   33.36    0.90
  -1  -5  -2   33.33    0.88
  -1  -5  -2   33.47    0.85
  -1  -5  -2   33.15    0.87
   1  -5   2   33.92    1.79
   1  -5   2   33.28    0.86
  -1  -5  -2   33.47    1.77
  -1  -5  -2   33.40    0.85
   1  -5   2   33.39    0.89
  -1   5  -2   33.02    0.89
   1   5   2   34.87    1.71
   1   5   2   32.35    0.89
  -1   5  -2   31.25    0.89
   1   5   2   33.23    2.42
  -1   5  -2   33.17    0.89
  -1   5  -2   32.44    0.88
   1   5   2   34.59    0.88
   1   5   2   32.07    0.94
   1   5   2   32.63    0.89
  -1   5  -2   32.55    1.67
  -1   5  -2   32.14    0.89
  -1   5  -2   31.29    2.44
   3  -5   2   52.27    1.35
  -3  -5  -2   52.48    1.36
  -3  -5  -2   52.47    1.33
  -3  -5  -2   52.30    1.35
   3  -5   2   52.06    1.32
   3  -5   2   54.34    1.37
  -3  -5  -2   51.75    3.42
  -3  -5  -2   52.20    1.36
   3  -5   2   54.35    2.23
   3  -5   2   50.82    3.13
  -3  -5  -2   54.88    2.34
   3  -5   2   49.97    1.37
   3  -5   2   52.63    1.32
  -3  -5  -2   52.07    1.35
  -3   5  -2   50.76    1.36
   3   5   2   49.30    2.21
   3   5   2   52.34    1.36
   3   5   2   52.60    1.35
  -3   5  -2   52.81    1.36
  -3   5  -2   51.86    1.36
  -3   5  -2   50.26    2.83
   3   5   2   50.32    1.36
  -3   5  -2   49.21    1.36
   3   5   2   48.97    3.01
  -3   5  -2   49.13    2.10
   3   5   2   52.96    1.37
  -3   5  -2   50.49    1.36
  -3   5  -2   52.06    1.34
   3   5   2   51.27    1.35
   5  -5   2   91.29    2.39
   5  -5   2   93.22    4.20
   5  -5   2   93.07    2.42
  -5  -5  -2   93.18    2.40
   5  -5   2   91.54    2.35
  -5  -5  -2   92.97    2.40
   5  -5   2   94.68    3.31
  -5  -5  -2   90.26    2.39
  -5  -5  -2   92.59    2.40
  -5  -5  -2   98.17    3.49
  -5  -5  -2   98.59    4.59
   5  -5   2   94.35    2.41
  -5  -5  -2   91.24    2.38
   5  -5   2   91.37    2.35
   5   5   2   85.07    2.41
   5   5   2  100.56    3.46
   5   5   2   90.93    2.41
  -5   5  -2   91.45    2.41
  -5   5  -2   91.34    2.41
  -5   5  -2   93.04    2.38
   5   5   2   93.22    2.40
   5   5   2   90.10    2.40
  -5   5  -2   99.41    3.26
  -5   5  -2  101.40    4.08
   5   5   2   98.69    4.42
  -7  -5  -2   19.93    0.58
   7  -5   2   18.61    2.24
   7  -5   2   19.32    1.37
  -7  -5  -2   19.79    0.56
  -7  -5  -2   19.26    0.57
   7  -5   2   19.79    0.55
  -7  -5  -2   20.07    0.54
   7  -5   2   19.60    0.59
  -7  -5  -2   20.02    0.57
   7  -5   2   19.58    0.58
   7   5   2   20.20    2.72
  -7   5  -2   19.84    1.38
   7   5   2   20.06    0.57
   7   5   2   16.91    1.57
  -7   5  -2   18.79    0.58
  -7   5  -2   19.54    0.58
   7   5   2   20.31    0.58
   7   5   2   20.76    0.57
  -7   5  -2   18.09    2.22
  -7   5  -2   20.45    0.55
   7   5   2   20.36    0.57
  -9  -5  -2   41.04    1.14
  -9  -5  -2   41.97    1.14
  -9  -5  -2   43.29    1.13
  -9  -5  -2   43.82    1.09
   9  -5   2   42.54    1.15
   9  -5   2   44.60    1.11
   9   5   2   40.96    1.14
   9   5   2   42.73    2.58
   9   5   2   42.51    1.13
   9   5   2   33.38    3.46
  -9   5  -2   40.82    3.08
   9   5   2   41.48    1.13
  -9   5  -2   42.74    1.11
  -9   5  -2   41.60    1.15
   9   5   2   41.54    2.40
  -9   5  -2   43.08    2.05
   9   5   2   41.67    1.08
  -9   5  -2   40.77    1.14
   9   5   2   43.76    4.30
 -11  -5  -2    6.01    0.27
 -11  -5  -2    5.83    0.28
  11  -5   2    5.78    0.27
 -11  -5  -2    5.67    0.28
 -11   5  -2    5.23    0.28
 -11   5  -2    5.36    0.29
  11   5   2    5.76    0.28
  11   5   2    4.22    2.18
 -11   5  -2    5.76    0.24
 -11   5  -2    5.47    0.28
  11   5   2    5.73    0.27
  11   5   2    6.06    0.26
  11   5   2    4.12    1.14
 -13  -5  -2    9.69    0.39
  13  -5   2    9.70    0.38
 -13  -5  -2    9.99    0.38
 -13  -5  -2   10.39    0.40
  13   5   2    9.99    0.38
 -13   5  -2   10.08    0.40
 -13   5  -2   10.05    0.41
 -13   5  -2   10.23    0.36
  13   5   2   10.30    0.37
 -13   5  -2    9.90    0.39
  13   5   2   10.64    0.40
 -15  -5  -2   24.28    0.75
  15  -5   2   24.83    0.73
 -15  -5  -2   24.20    0.74
 -15  -5  -2   23.98    0.74
  15   5   2   25.14    0.72
 -15   5  -2   24.82    0.71
  15   5   2   24.52    0.73
 -15   5  -2   23.66    0.75
 -15   5  -2   22.25    0.82
 -15   5  -2   23.37    0.75
  17  -5   2    1.85    0.24
 -17  -5  -2    1.41    0.19
 -17  -5  -2    1.65    0.20
 -17  -5  -2    1.25    0.17
 -17   5  -2    1.81    0.24
  17   5   2    1.78    0.26
 -17   5  -2    2.14    0.28
 -17   5  -2    2.05    0.22
 -17   5  -2    1.61    0.19
 -19  -5  -2    7.31    0.42
 -19  -5  -2    7.35    0.42
 -19  -5  -2    7.38    0.40
 -19   5  -2    7.12    0.42
  19   5   2    7.34    0.39
 -19   5  -2    7.02    0.40
  19   5   2    7.30    0.40
 -19   5  -2    7.55    0.42
 -21  -5  -2    4.15    0.49
  21   5   2    5.03    0.38
 -22  -6   2    2.56    0.32
 -22  -6   2    2.25    0.31
 -22  -6   2    2.64    0.34
 -22   6   2    2.88    0.33
  22   6  -2    2.16    0.32
 -22   6   2    1.95    0.21
 -22   6   2    2.44    0.30
 -22   6   2    2.64    0.39
 -20  -6   2    0.26    0.17
  20  -6  -2    0.14    0.18
 -20  -6   2    0.13    0.18
 -20   6   2    0.33    0.16
 -20   6   2   -0.06    0.18
 -20   6   2    0.21    0.15
 -20   6   2    0.32    0.19
  20   6  -2    0.05    0.18
 -20   6   2    0.35    0.18
 -18  -6   2    1.83    0.21
  18  -6  -2    2.11    0.29
 -18  -6   2    1.97    0.29
 -18   6   2    1.93    0.25
 -18   6   2    1.93    0.24
 -18   6   2    2.21    0.28
  18   6  -2    2.11    0.30
 -18   6   2    1.89    0.31
 -18   6   2    1.85    0.22
  18   6  -2    1.81    0.20
 -16  -6   2    0.13    0.11
 -16  -6   2   -0.03    0.13
 -16  -6   2    0.21    0.14
  16  -6  -2    0.11    0.14
 -16   6   2    0.02    0.14
 -16   6   2    0.09    0.13
 -16   6   2    0.18    0.14
  16   6  -2    0.18    0.12
 -16   6   2    0.23    0.15
  16   6  -2    0.19    0.16
  16   6  -2    0.24    0.15
 -16   6   2   -0.06    0.12
  14  -6  -2    2.04    0.25
 -14  -6   2    2.12    0.24
 -14  -6   2    2.03    0.19
 -14  -6   2    1.94    0.22
 -14   6   2    1.97    0.22
 -14   6   2    2.04    0.25
 -14   6   2    1.99    0.21
  14   6  -2    1.95    0.20
  14   6  -2    1.98    0.23
  14   6  -2    1.82    0.23
 -14   6   2    2.00    0.22
 -14   6   2    2.17    0.24
 -12  -6   2    2.72    0.16
 -12  -6   2    2.44    0.22
 -12  -6   2    2.79    0.20
 -12  -6   2    2.47    1.05
 -12  -6   2    0.47    2.52
  12  -6  -2    2.70    0.24
 -12  -6   2    2.73    0.21
  12   6  -2    2.73    0.23
 -12   6   2    2.72    0.21
 -12   6   2    2.59    0.23
  12   6  -2    2.62    0.23
 -12   6   2    2.47    0.24
  12   6  -2    2.74    0.23
  12   6  -2    2.77    0.20
 -12   6   2    2.77    0.22
 -10  -6   2   26.82    3.91
 -10  -6   2   21.90    0.69
 -10  -6   2   22.70    0.65
 -10  -6   2   21.70    0.66
  10  -6  -2   21.63    0.68
 -10  -6   2   22.48    0.66
 -10  -6   2   25.05    2.21
  10   6  -2   22.74    0.67
  10   6  -2   23.41    0.68
  10   6  -2   19.07    2.93
 -10   6   2   23.89    0.67
 -10   6   2   23.48    0.70
 -10   6   2   23.52    0.67
  10   6  -2   23.23    0.67
  10   6  -2   23.64    0.65
 -10   6   2   23.18    0.67
  10   6  -2   22.97    2.06
  -8  -6   2    0.92    0.15
  -8  -6   2    1.05    0.12
   8  -6  -2    1.69    1.70
   8  -6  -2    1.19    0.13
   8  -6  -2    0.19    0.72
  -8  -6   2    4.62    2.33
  -8  -6   2    1.56    1.10
  -8  -6   2    0.70    0.10
   8   6  -2    0.04    2.00
  -8   6   2    0.98    0.12
   8   6  -2    1.09    0.95
   8   6  -2    0.92    0.12
   8   6  -2    0.84    0.11
  -8   6   2    1.11    0.14
  -8   6   2    0.95    0.67
  -8   6   2    1.23    0.18
  -8   6   2    1.73    1.50
   8   6  -2    0.97    0.11
  -8   6   2    1.11    0.16
   8   6  -2    0.85    0.12
  -6  -6   2    6.70    0.28
  -6  -6   2    6.22    1.20
   6  -6  -2    5.21    0.85
  -6  -6   2    7.13    0.27
  -6  -6   2    7.10    0.26
  -6  -6   2    5.37    2.21
   6  -6  -2    7.06    0.29
   6  -6  -2    4.46    1.51
   6  -6  -2    7.31    0.21
  -6   6   2    7.02    0.29
  -6   6   2    7.00    0.28
   6   6  -2    7.28    0.28
  -6   6   2    6.75    1.13
   6   6  -2    7.33    0.28
   6   6  -2    6.18    1.01
   6   6  -2    6.12    1.79
   6   6  -2    7.17    0.28
  -6   6   2    7.91    1.64
  -6   6   2    7.06    0.28
   6   6  -2    7.22    0.24
   6   6  -2    7.24    0.26
  -6   6   2    7.60    0.26
  -6   6   2    7.17    0.28
  -4  -6   2   18.05    1.79
  -4  -6   2   19.58    2.56
   4  -6  -2   17.72    0.55
   4  -6  -2   17.87    0.49
  -4  -6   2   17.16    0.54
  -4  -6   2   18.39    0.54
  -4  -6   2   17.96    0.53
   4   6  -2   18.30    0.53
   4   6  -2   17.68    0.51
  -4   6   2   17.42    0.54
  -4   6   2   18.11    2.04
   4   6  -2   16.63    1.51
   4   6  -2   17.58    0.53
  -4   6   2   19.32    1.30
  -4   6   2   19.20    0.54
   4   6  -2   17.48    2.53
   4   6  -2   18.36    0.54
  -4   6   2   17.65    0.53
  -4   6   2   18.30    0.54
   4   6  -2   17.91    0.53
  -2  -6   2    7.49    0.24
  -2  -6   2    6.54    2.12
  -2  -6   2    7.83    0.24
   2  -6  -2    5.74    2.03
   2  -6  -2    7.46    0.28
  -2  -6   2    7.50    0.28
   2  -6  -2    7.65    0.22
  -2  -6   2    8.15    1.54
   2  -6  -2    7.55    1.14
  -2  -6   2    7.73    0.29
   2  -6  -2    7.49    0.29
  -2  -6   2    7.76    0.28
   2  -6  -2    7.70    0.24
  -2   6   2    7.84    0.27
  -2   6   2    8.79    1.08
   2   6  -2    7.43    0.28
  -2   6   2    7.16    0.29
   2   6  -2    7.41    0.30
  -2   6   2    7.38    0.28
   2   6  -2    5.96    1.16
   2   6  -2    7.37    0.28
  -2   6   2    7.72    0.28
   2   6  -2    7.24    0.26
   2   6  -2    7.55    0.28
  -2   6   2    7.28    0.28
  -2   6   2    6.03    1.34
   2   6  -2    8.56    1.73
   0  -6   2    1.39    0.95
   0  -6   2    1.76    0.09
   0  -6   2    1.53    0.17
   0  -6   2    2.10    1.98
   0  -6  -2    2.11    1.74
   0  -6   2    1.57    0.16
   0  -6  -2    1.58    0.16
   0  -6   2    1.60    0.09
   0  -6  -2    1.78    0.16
   0  -6  -2    1.62    0.07
   0  -6   2    1.48    0.17
   0  -6  -2    1.69    0.10
   0  -6  -2    1.70    0.14
   0  -6  -2    1.94    0.83
   0   6  -2    1.87    0.64
   0   6  -2    1.58    0.18
   0   6   2    1.61    0.22
   0   6  -2    1.65    0.16
   0   6  -2    1.76    0.16
   0   6   2    1.83    0.16
   0   6  -2    1.70    0.15
   0   6   2    1.59    0.17
   0   6   2    4.30    1.44
   0   6   2    1.82    0.16
   0   6   2    0.52    0.59
   0   6  -2    1.48    0.17
   0   6   2    1.61    0.16
   0   6  -2    2.05    1.45
   2  -6   2   11.22    0.35
  -2  -6  -2   11.16    2.33
   2  -6   2   11.01    0.37
   2  -6   2   10.79    0.36
  -2  -6  -2   10.94    1.64
   2  -6   2    9.55    1.58
   2  -6   2   11.23    0.29
  -2  -6  -2   10.26    0.34
  -2  -6  -2   11.10    0.35
   2  -6   2   11.18    2.38
  -2  -6  -2   11.20    0.30
   2  -6   2   11.04    0.28
  -2  -6  -2   10.73    0.35
  -2   6  -2    9.98    0.35
  -2   6  -2    9.57    0.35
  -2   6  -2    9.54    1.88
   2   6   2   10.05    0.35
   2   6   2    8.27    1.29
   2   6   2    9.99    0.35
   2   6   2    9.85    0.35
   2   6   2    9.98    0.33
   2   6   2   10.25    1.91
  -2   6  -2    9.87    1.26
  -2   6  -2   10.00    0.35
   2   6   2   10.04    0.35
  -2   6  -2   10.01    0.35
  -2   6  -2    9.84    0.36
  -4  -6  -2   11.68    0.37
  -4  -6  -2   11.30    0.37
  -4  -6  -2   11.75    0.36
  -4  -6  -2    8.13    2.36
   4  -6   2   11.76    0.37
   4  -6   2    9.85    2.13
   4  -6   2   11.06    0.39
  -4  -6  -2   13.34    1.75
  -4  -6  -2   11.87    0.36
  -4  -6  -2   11.87    0.33
   4  -6   2   10.92    1.53
   4   6   2   11.05    0.35
  -4   6  -2   10.47    0.32
  -4   6  -2   11.06    0.38
   4   6   2   11.21    0.37
   4   6   2   10.87    0.38
  -4   6  -2   11.55    1.90
  -4   6  -2   10.70    0.38
  -4   6  -2   10.51    1.23
   4   6   2   10.96    0.37
  -4   6  -2   10.81    0.38
   4   6   2   10.54    1.47
   4   6   2   11.14    2.07
  -4   6  -2   10.49    0.37
   4   6   2   10.96    0.38
  -4   6  -2   10.72    0.38
  -6  -6  -2    6.22    0.23
   6  -6   2    5.50    0.27
  -6  -6  -2    6.07    0.23
  -6  -6  -2    9.41    2.64
  -6  -6  -2    5.87    0.27
  -6  -6  -2    5.87    0.25
   6  -6   2    5.87    0.25
  -6  -6  -2    5.76    0.25
  -6  -6  -2    4.52    1.26
  -6   6  -2    5.68    0.27
  -6   6  -2    5.68    0.28
   6   6   2    5.70    0.26
  -6   6  -2    6.15    0.20
   6   6   2    5.35    2.15
   6   6   2    6.12    0.26
   6   6   2    5.85    0.24
  -6   6  -2    5.90    0.26
  -6   6  -2    5.68    0.27
   6   6   2    5.90    0.27
   6   6   2    6.73    1.28
  -8  -6  -2    0.60    0.10
   8  -6   2    0.59    0.13
  -8  -6  -2    0.66    0.11
   8  -6   2    0.74    0.11
  -8  -6  -2    0.57    0.11
  -8  -6  -2    0.62    0.09
   8   6   2    0.89    0.13
   8   6   2    0.75    0.12
  -8   6  -2    0.54    0.11
   8   6   2    0.84    0.11
   8   6   2    0.36    0.11
  -8   6  -2    0.58    0.11
  -8   6  -2    0.63    0.13
  -8   6  -2    0.69    0.09
   8   6   2    0.89    2.48
   8   6   2    0.32    1.10
  10  -6   2   23.44    0.73
 -10  -6  -2   23.36    0.79
 -10  -6  -2   23.35    0.71
 -10  -6  -2   24.05    0.69
  10   6   2   23.08    2.45
  10   6   2   24.02    0.69
 -10   6  -2   23.72    0.66
  10   6   2   24.58    0.70
 -10   6  -2   23.51    0.70
  10   6   2   23.87    0.71
  10   6   2   27.72    3.74
 -10   6  -2   23.03    0.71
  12  -6   2   11.31    0.44
 -12  -6  -2   11.37    0.45
 -12  -6  -2   11.89    0.44
 -12  -6  -2   11.74    0.42
 -12   6  -2   11.36    0.43
  12   6   2   12.10    0.42
 -12   6  -2   10.35    0.55
  12   6   2   11.29    0.44
 -12   6  -2   12.02    0.39
  12   6   2   12.25    0.42
 -14  -6  -2   16.90    0.58
 -14  -6  -2   17.24    0.58
 -14  -6  -2   17.37    0.57
  14  -6   2   16.71    0.58
 -14   6  -2   16.53    0.57
  14   6   2   17.23    0.56
  14   6   2   16.55    0.58
  14   6   2   16.82    0.70
 -14   6  -2   16.59    0.58
 -16  -6  -2    6.39    0.37
  16  -6   2    6.34    0.38
 -16  -6  -2    5.77    0.36
 -16  -6  -2    6.08    0.38
  16   6   2    6.38    0.35
  16   6   2    6.48    0.35
 -16   6  -2    6.27    0.36
 -16   6  -2    6.62    0.38
 -18  -6  -2    0.81    0.18
 -18  -6  -2    1.10    0.20
 -18  -6  -2    1.37    0.22
  18   6   2    0.82    0.18
  18   6   2    1.00    0.22
 -18   6  -2    1.24    0.19
 -18   6  -2    1.32    0.22
 -21   7   2    1.46    0.28
 -19  -7   2    2.69    0.35
  19  -7  -2    3.26    0.37
 -19  -7   2    3.02    0.36
 -19  -7   2    2.86    0.35
 -19   7   2    2.29    0.30
 -19   7   2    2.88    0.34
 -19   7   2    3.33    0.33
 -19   7   2    3.53    0.38
  19   7  -2    3.37    0.35
 -17  -7   2   21.87    0.73
 -17  -7   2   22.02    0.72
  17  -7  -2   21.84    0.73
 -17  -7   2   22.28    0.67
 -17   7   2   22.15    0.75
  17   7  -2   22.77    0.73
 -17   7   2   21.90    0.72
 -17   7   2   22.43    0.71
  17   7  -2   21.66    0.72
 -17   7   2   21.59    0.70
 -15  -7   2   21.73    0.70
  15  -7  -2   21.30    0.70
 -15  -7   2   21.30    0.68
 -15  -7   2   18.26    0.76
 -15   7   2   20.57    0.67
  15   7  -2   21.13    0.68
 -15   7   2   21.24    0.66
 -15   7   2   20.99    0.71
  15   7  -2   21.34    0.67
 -15   7   2   21.70    0.67
  15   7  -2   20.54    0.63
 -13  -7   2    3.88    0.25
 -13  -7   2    3.97    0.27
 -13  -7   2    3.54    0.29
  13  -7  -2    3.35    0.31
 -13   7   2    3.62    0.31
  13   7  -2    3.74    0.28
 -13   7   2    3.72    0.36
 -13   7   2    3.70    0.33
  13   7  -2    3.38    0.35
  13   7  -2    3.67    0.25
 -11  -7   2   12.39    0.41
 -11  -7   2   11.82    0.42
 -11  -7   2   12.23    0.44
  11  -7  -2   12.15    0.46
 -11  -7   2   12.45    0.43
  11   7  -2   12.60    0.42
 -11   7   2   12.99    0.45
 -11   7   2   12.20    0.44
 -11   7   2   12.75    0.47
  11   7  -2   12.51    0.45
  11   7  -2   12.17    0.46
  11   7  -2   12.49    0.45
 -11   7   2   12.47    0.44
  -9  -7   2   20.86    0.64
  -9  -7   2   24.92    2.70
  -9  -7   2   21.80    0.65
  -9  -7   2   19.88    3.83
  -9  -7   2   21.57    0.63
  -9  -7   2   21.63    0.63
   9  -7  -2   21.29    0.67
   9   7  -2   21.71    0.65
   9   7  -2   21.20    2.42
   9   7  -2   21.52    0.66
  -9   7   2   21.31    0.65
   9   7  -2   21.71    0.66
  -9   7   2   21.39    0.63
   9   7  -2   17.72    3.22
  -9   7   2   20.79    0.67
  -9   7   2   21.21    0.65
   9   7  -2   21.96    0.63
  -9   7   2   21.58    0.65
   7  -7  -2    0.08    0.11
  -7  -7   2   -0.01    1.31
  -7  -7   2   -3.54    2.91
  -7  -7   2   -0.01    0.09
  -7  -7   2   -0.04    0.09
  -7  -7   2    0.14    0.11
  -7   7   2   -0.01    0.10
  -7   7   2    0.04    0.12
   7   7  -2    0.06    0.11
   7   7  -2    1.36    1.13
   7   7  -2   -0.07    0.11
   7   7  -2   -0.58    2.34
  -7   7   2    0.09    0.08
   7   7  -2    0.06    0.10
   7   7  -2    0.05    0.12
  -7   7   2   -0.09    0.10
  -7   7   2    0.07    0.11
   5  -7  -2   23.00    0.70
  -5  -7   2   23.30    0.66
  -5  -7   2   28.04    4.04
   5  -7  -2   22.91    0.63
  -5  -7   2   22.99    2.62
  -5  -7   2   23.48    0.69
  -5  -7   2   23.74    0.69
  -5  -7   2   23.40    0.66
   5   7  -2   23.93    0.68
   5   7  -2   21.86    2.09
   5   7  -2   25.94    3.98
  -5   7   2   23.69    0.66
   5   7  -2   22.84    0.69
  -5   7   2   23.09    0.68
  -5   7   2   23.73    0.69
   5   7  -2   23.92    0.66
  -5   7   2   23.29    0.70
   5   7  -2   23.27    0.69
  -5   7   2   23.70    0.69
   5   7  -2   23.97    0.70
  -3  -7   2   15.35    0.45
   3  -7  -2   16.12    0.51
  -3  -7   2   15.97    0.50
  -3  -7   2   15.53    0.49
  -3  -7   2   15.84    0.46
  -3   7   2   15.19    0.49
   3   7  -2   15.30    0.47
  -3   7   2   15.44    0.46
  -3   7   2   15.48    0.50
  -3   7   2   15.23    0.49
   3   7  -2   15.13    0.50
  -3   7   2   15.23    0.49
   3   7  -2   15.37    0.49
   3   7  -2   18.84    2.82
   3   7  -2   15.19    1.76
   3   7  -2   15.52    0.50
   3   7  -2   15.19    0.48
   1  -7  -2    6.32    0.20
  -1  -7   2    6.25    0.29
  -1  -7   2    5.94    0.20
   1  -7  -2    6.26    0.24
  -1  -7   2    6.20    0.21
   1  -7  -2    5.91    0.28
   1  -7  -2    6.23    0.27
  -1  -7   2    6.12    0.27
  -1   7   2    6.19    0.27
   1   7  -2    5.64    0.28
  -1   7   2    6.02    0.28
  -1   7   2    6.08    0.28
   1   7  -2    5.76    0.29
  -1   7   2    6.17    0.27
   1   7  -2    6.10    0.26
   1   7  -2    5.85    0.26
  -1   7   2    5.95    0.24
   1   7  -2    5.68    0.27
  -1  -7  -2   21.06    0.65
  -1  -7  -2   21.79    0.62
   1  -7   2   21.49    0.65
  -1  -7  -2   21.67    0.63
  -1  -7  -2   21.72    0.65
   1  -7   2   21.59    0.67
   1   7   2   22.85    0.62
  -1   7  -2   21.89    0.64
  -1   7  -2   21.74    0.65
   1   7   2   21.65    0.65
   1   7   2   22.06    0.65
   1   7   2   21.30    0.64
  -1   7  -2   22.28    0.64
   1   7   2   21.98    0.64
  -1   7  -2   22.14    0.66
  -1   7  -2   22.09    0.65
  -3  -7  -2   63.10    1.71
   3  -7   2   64.87    1.73
  -3  -7  -2   65.34    1.70
  -3  -7  -2   65.62    1.69
  -3  -7  -2   65.02    1.71
   3  -7   2   63.84    1.71
   3   7   2   63.01    1.71
   3   7   2   65.18    1.71
  -3   7  -2   64.94    1.71
  -3   7  -2   66.51    1.73
   3   7   2   64.14    1.72
   3   7   2   63.87    1.71
  -3   7  -2   63.55    1.72
  -3   7  -2   65.18    1.71
  -3   7  -2   65.14    1.71
   3   7   2   65.63    1.69
   5  -7   2   18.40    0.59
   5  -7   2   18.45    0.56
  -5  -7  -2   18.44    0.55
  -5  -7  -2   18.42    0.57
  -5  -7  -2   18.56    0.55
  -5   7  -2   17.93    0.57
   5   7   2   17.92    0.56
   5   7   2   19.12    0.55
  -5   7  -2   18.01    0.57
  -5   7  -2   18.58    0.57
  -5   7  -2   18.08    0.58
   5   7   2   18.52    0.56
   5   7   2   18.21    0.58
  -5   7  -2   18.11    0.58
  -7  -7  -2   12.54    0.45
   7  -7   2   12.53    0.43
  -7  -7  -2   12.36    0.43
  -7  -7  -2   12.41    0.41
  -7  -7  -2   12.64    0.40
   7  -7   2   12.01    0.46
   7   7   2   12.93    0.44
  -7   7  -2   12.57    0.44
   7   7   2   13.01    0.44
  -7   7  -2   12.55    0.45
  -7   7  -2   12.91    0.45
  -7   7  -2   12.61    0.46
  -7   7  -2   12.39    0.45
   7   7   2   12.87    0.42
   7   7   2   12.14    0.44
  -9  -7  -2   12.42    0.45
   9  -7   2   12.04    0.47
  -9  -7  -2   12.47    0.44
   9  -7   2   12.35    0.42
  -9  -7  -2   12.61    0.42
   9   7   2   12.36    0.44
  -9   7  -2   12.46    0.54
   9   7   2   12.39    0.42
  -9   7  -2   11.03    0.56
   9   7   2   12.88    0.44
  -9   7  -2   12.36    0.47
   9   7   2   12.08    0.54
  -9   7  -2    9.78    0.57
  11  -7   2    7.79    0.39
 -11  -7  -2    8.17    0.38
 -11  -7  -2    7.90    0.48
 -11  -7  -2    8.07    0.36
 -11   7  -2    8.55    0.39
  11   7   2    8.58    0.35
 -11   7  -2    8.59    0.37
 -11   7  -2    8.15    0.37
  11   7   2    8.22    0.38
  11   7   2    8.63    0.38
 -11   7  -2    8.15    0.40
 -13  -7  -2    0.37    0.15
  13  -7   2    0.51    0.17
 -13  -7  -2    0.44    0.16
 -13  -7  -2    0.17    0.19
 -13   7  -2    0.20    0.15
  13   7   2    0.20    0.16
 -13   7  -2    0.48    0.19
 -13   7  -2    0.35    0.14
  13   7   2    0.27    0.15
  13   7   2    0.49    0.15
 -13   7  -2    0.37    0.16
 -15  -7  -2   13.35    0.52
 -15  -7  -2   13.07    0.53
 -15  -7  -2   13.63    0.55
  15  -7   2   13.97    0.56
  15   7   2   13.75    0.52
  15   7   2   13.63    0.56
 -15   7  -2   13.03    0.53
 -15   7  -2   14.06    0.53
 -15   7  -2   14.07    0.55
  15   7   2   14.09    0.52
  17  -7   2    0.12    0.20
 -17  -7  -2    0.03    0.17
 -17  -7  -2    0.55    0.20
 -17  -7  -2    0.24    0.18
 -17   7  -2    0.11    0.18
 -17   7  -2    0.15    0.18
 -17   7  -2    0.42    0.18
  17   7   2   -0.02    0.16
  18  -8  -2    7.32    0.45
 -18  -8   2    6.96    0.42
 -18  -8   2    7.75    0.42
 -18  -8   2    7.83    0.47
 -18   8   2    7.43    0.43
 -18   8   2    6.67    0.38
  18   8  -2    6.78    0.44
  18   8  -2    7.08    0.42
 -18   8   2    7.34    0.40
 -16  -8   2   13.36    0.53
 -16  -8   2   13.85    0.49
 -16  -8   2   12.86    0.54
 -16  -8   2   13.58    0.54
  16  -8  -2   12.92    0.56
 -16   8   2   11.71    0.62
  16   8  -2   13.00    0.52
 -16   8   2   12.55    0.51
 -16   8   2   12.63    0.53
  16   8  -2   13.13    0.54
 -16   8   2   12.64    0.57
 -14  -8   2    6.16    0.37
 -14  -8   2    5.66    0.35
  14  -8  -2    5.40    0.39
 -14  -8   2    5.90    0.38
 -14  -8   2    5.79    0.33
  14   8  -2    5.05    0.35
  14   8  -2    5.32    0.37
 -14   8   2    5.27    0.31
 -14   8   2    5.37    0.34
 -14   8   2    5.51    0.35
 -14   8   2    5.48    0.40
 -14   8   2    5.04    0.32
 -12  -8   2    1.87    0.26
 -12  -8   2    1.85    0.28
  12  -8  -2    2.59    0.30
 -12  -8   2    2.07    0.28
 -12  -8   2    2.36    0.26
 -12   8   2    3.03    0.28
 -12   8   2    2.20    0.24
  12   8  -2    2.32    0.29
  12   8  -2    1.97    0.26
 -12   8   2    2.49    0.27
 -12   8   2    2.28    0.25
  12   8  -2    2.09    0.28
 -12   8   2    2.42    0.31
  12   8  -2    2.41    0.27
 -10  -8   2    3.18    0.25
 -10  -8   2    3.19    0.28
 -10  -8   2    3.44    0.28
 -10  -8   2    3.29    0.25
  10  -8  -2    3.45    0.30
 -10  -8   2    3.64    0.25
 -10   8   2    3.33    0.28
  10   8  -2    2.94    0.36
 -10   8   2    2.96    0.31
 -10   8   2    3.23    0.24
  10   8  -2    2.95    0.26
  10   8  -2    3.02    0.29
 -10   8   2    3.03    0.27
 -10   8   2    3.03    0.27
  10   8  -2    3.23    0.28
  -8  -8   2    8.30    0.34
  -8  -8   2    6.98    0.42
  -8  -8   2    7.84    0.34
  -8  -8   2    7.88    0.34
   8  -8  -2    7.79    0.38
  -8  -8   2    8.58    0.33
   8   8  -2    7.03    0.41
   8   8  -2    7.33    0.34
  -8   8   2    7.62    0.39
  -8   8   2    7.88    0.36
   8   8  -2    7.80    0.34
  -8   8   2    7.43    0.35
   8   8  -2    7.31    0.45
  -8   8   2    7.59    0.32
  -6  -8   2    0.72    0.14
  -6  -8   2    0.48    0.13
  -6  -8   2    0.55    0.13
   6  -8  -2    0.52    0.16
  -6  -8   2    0.86    0.16
  -6   8   2    0.81    0.17
   6   8  -2    0.60    0.14
  -6   8   2    0.96    0.13
  -6   8   2    0.69    0.14
   6   8  -2    0.70    0.13
   6   8  -2    0.53    0.15
  -6   8   2    0.93    0.15
  -6   8   2    0.70    0.19
   6   8  -2    0.52    0.13
  -4  -8   2   10.02    0.35
   4  -8  -2    9.59    0.40
  -4  -8   2    9.66    0.39
  -4  -8   2    9.58    0.39
  -4  -8   2   10.06    0.35
  -4   8   2    9.11    0.38
   4   8  -2    9.92    0.36
  -4   8   2    9.84    0.40
   4   8  -2    9.70    0.39
   4   8  -2    9.47    0.39
  -4   8   2    9.67    0.35
   4   8  -2    9.65    0.38
   4   8  -2    9.61    0.37
  -4   8   2    9.60    0.38
  -4   8   2    9.74    0.39
  -2  -8   2    9.67    0.38
   2  -8  -2    9.21    0.33
  -2  -8   2    9.43    0.39
   2  -8  -2    9.52    0.38
  -2   8   2    8.98    0.38
  -2   8   2    9.35    0.34
   2   8  -2    9.36    0.36
   2   8  -2    9.42    0.36
  -2   8   2    9.37    0.39
  -2   8   2    9.48    0.38
   2   8  -2    9.08    0.37
   2   8  -2    9.11    0.39
  -2   8   2    9.43    0.37
   2   8  -2    9.26    0.38
   0  -8   2    2.07    0.23
   0  -8   2    1.69    0.23
   0  -8  -2    1.87    0.22
   0  -8  -2    1.72    0.20
   0   8   2    1.77    0.21
   0   8   2    1.76    0.24
   0   8  -2    2.15    0.24
   0   8  -2    2.29    0.25
   0   8   2    1.89    0.22
   0   8   2    1.81    0.19
   0   8   2    1.98    0.22
   0   8  -2    2.16    0.25
   0   8  -2    1.90    0.22
   0   8  -2    1.74    0.22
  -2  -8  -2   23.23    0.70
   2  -8   2   23.91    0.73
  -2  -8  -2   23.65    0.68
   2  -8   2   23.34    0.71
  -2   8  -2   22.81    0.70
   2   8   2   23.30    0.71
  -2   8  -2   23.23    0.70
  -2   8  -2   23.22    0.71
   2   8   2   22.67    0.71
   2   8   2   23.43    0.67
  -2   8  -2   23.36    0.72
   2   8   2   23.45    0.70
   2   8   2   22.42    0.70
  -2   8  -2   22.94    0.70
   4  -8   2   41.07    1.13
  -4  -8  -2   42.77    1.13
  -4  -8  -2   41.58    1.11
  -4  -8  -2   41.67    1.12
  -4   8  -2   35.94    1.25
   4   8   2   40.51    1.14
   4   8   2   41.60    1.13
  -4   8  -2   39.90    1.14
  -4   8  -2   40.53    1.14
  -4   8  -2   41.62    1.30
   4   8   2   40.42    1.13
   4   8   2   40.39    1.11
  -6  -8  -2    4.36    0.28
   6  -8   2    4.58    0.31
  -6  -8  -2    4.25    0.25
   6  -8   2    4.14    0.29
  -6  -8  -2    4.42    0.29
  -6   8  -2    4.16    0.28
  -6   8  -2    4.07    0.29
   6   8   2    4.21    0.25
   6   8   2    4.33    0.29
  -6   8  -2    4.38    0.30
  -6   8  -2    4.36    0.29
   6   8   2    4.34    0.28
  -6   8  -2    4.30    0.30
   8  -8   2   19.47    0.62
  -8  -8  -2   19.66    0.63
   8  -8   2   19.09    0.65
  -8  -8  -2   19.28    0.63
  -8   8  -2   19.11    0.63
   8   8   2   19.73    0.61
   8   8   2   19.58    0.63
   8   8   2   19.06    0.64
  -8   8  -2   19.47    0.64
  -8   8  -2   18.01    0.78
  -8   8  -2   18.92    0.63
  -8   8  -2   19.77    0.64
   8   8   2   20.53    0.63
 -10  -8  -2   12.59    0.50
  10  -8   2   13.39    0.52
 -10  -8  -2   13.07    0.49
 -10   8  -2   12.90    0.52
 -10   8  -2   11.61    0.50
 -10   8  -2   12.72    0.49
  10   8   2   12.29    0.50
 -10   8  -2   12.56    0.48
  10   8   2   12.37    0.48
 -10   8  -2   12.44    0.50
  12  -8   2    4.38    0.37
 -12  -8  -2    4.63    0.37
 -12  -8  -2    4.27    0.36
  12   8   2    4.76    0.35
  12   8   2    4.34    0.33
 -12   8  -2    3.96    0.35
 -12   8  -2    4.88    0.38
 -12   8  -2    4.98    0.35
  12   8   2    4.41    0.31
 -12   8  -2    4.85    0.35
 -12   8  -2    4.68    0.35
 -14  -8  -2   10.36    0.50
 -14  -8  -2   10.71    0.51
  14  -8   2   10.32    0.52
 -14   8  -2   10.84    0.50
  14   8   2    9.51    0.50
 -14   8  -2   10.93    0.48
  14   8   2   11.17    0.48
 -14   8  -2   10.60    0.50
  14   8   2   10.26    0.46
 -14   8  -2   11.23    0.54
  16  -8   2    5.87    0.52
 -15  -9   2    1.28    0.21
 -15  -9   2    1.50    0.23
  15   9  -2    1.12    0.23
  15   9  -2    1.25    0.20
 -15   9   2    1.32    0.21
 -15   9   2    1.36    0.20
  13  -9  -2    0.37    0.21
 -13  -9   2    0.17    0.16
 -13  -9   2    0.23    0.19
 -13  -9   2    0.58    0.19
 -13   9   2    0.56    0.17
  13   9  -2    0.44    0.17
 -13   9   2    0.31    0.17
  13   9  -2    0.54    0.19
 -13   9   2    0.50    0.22
 -13   9   2    0.13    0.18
  13   9  -2    0.28    0.20
 -11  -9   2    1.20    0.19
  11  -9  -2    1.29    0.22
 -11  -9   2    1.10    0.18
 -11  -9   2    1.01    0.20
  11   9  -2    1.22    0.19
  11   9  -2    1.77    0.26
 -11   9   2    1.02    0.19
  11   9  -2    1.34    0.20
  11   9  -2    1.09    0.20
 -11   9   2    1.20    0.20
 -11   9   2    1.20    0.21
 -11   9   2    1.13    0.19
  -9  -9   2    0.74    0.15
   9  -9  -2    0.28    0.16
  -9  -9   2    0.77    0.17
  -9  -9   2    0.42    0.15
   9   9  -2    0.16    0.16
  -9   9   2    0.25    0.15
   9   9  -2    0.43    0.15
  -9   9   2    0.55    0.20
   9   9  -2    0.25    0.17
  -9   9   2    0.30    0.16
   9   9  -2    0.23    0.18
  -9   9   2    0.33    0.16
   7  -9  -2    0.92    0.18
  -7  -9   2    0.94    0.17
  -7  -9   2    0.97    0.16
  -7  -9   2    1.05    0.17
   7   9  -2    1.15    0.20
   7   9  -2    1.11    0.17
  -7   9   2    0.91    0.17
  -7   9   2    1.13    0.18
   7   9  -2    1.16    0.19
   7   9  -2    1.20    0.17
  -7   9   2    1.19    0.20
  -7   9   2    1.15    0.18
  -5  -9   2   11.02    0.44
   5  -9  -2   10.45    0.45
  -5  -9   2   10.58    0.44
   5   9  -2   11.02    0.43
  -5   9   2   10.96    0.45
   5   9  -2   10.34    0.44
  -5   9   2   10.64    0.43
  -5   9   2   11.23    0.47
  -5   9   2   10.47    0.43
   5   9  -2   10.36    0.45
  -5   9   2   10.77    0.49
   5   9  -2   10.21    0.42
  -3  -9   2   12.83    0.48
  -3  -9   2   13.02    0.48
   3  -9  -2   12.76    0.49
   3   9  -2   12.11    0.49
  -3   9   2   12.09    0.47
  -3   9   2   12.44    0.47
  -3   9   2   12.35    0.48
   3   9  -2   12.19    0.48
   3   9  -2   12.31    0.47
  -3   9   2   12.44    0.47
  -3   9   2   12.49    0.50
   3   9  -2   12.07    0.47
   1  -9  -2    2.13    0.27
  -1  -9   2    2.07    0.27
  -1  -9   2    2.30    0.27
  -1   9   2    1.81    0.26
  -1   9   2    1.95    0.21
  -1   9   2    2.22    0.26
   1   9  -2    1.77    0.25
  -1   9   2    2.12    0.26
   1   9  -2    1.98    0.28
   1   9  -2    1.93    0.27
  -1   9   2    2.08    0.34
   1   9  -2    2.31    0.31
   1   9  -2    2.27    0.27
  -1  -9  -2   13.87    0.51
   1  -9   2   14.27    0.51
   1  -9   2   13.90    0.53
   1   9   2   13.88    0.51
   1   9   2   13.37    0.51
  -1   9  -2   13.17    0.51
   1   9   2   13.32    0.50
  -1   9  -2   13.82    0.50
   1   9   2   13.99    0.50
   1   9   2   12.95    0.46
  -1   9  -2   14.37    0.51
  -1   9  -2   13.82    0.52
  -1   9  -2   13.85    0.51
   3  -9   2    8.19    0.39
  -3  -9  -2    8.50    0.40
  -3  -9  -2    8.69    0.38
   3  -9   2    8.92    0.42
   3   9   2    7.17    0.40
  -3   9  -2    7.86    0.40
   3   9   2    8.08    0.40
   3   9   2    8.39    0.38
  -3   9  -2    8.87    0.45
   3   9   2    8.26    0.38
  -3   9  -2    7.90    0.38
   3   9   2    8.50    0.36
  -3   9  -2    8.16    0.39
  -3   9  -2    7.73    0.39
  -5  -9  -2    0.41    0.17
   5  -9   2    0.45    0.18
   5  -9   2    0.35    0.16
   5   9   2    0.76    0.20
  -5   9  -2    0.39    0.16
   5   9   2    0.47    0.16
   5   9   2    0.65    0.18
  -5   9  -2    0.57    0.19
  -5   9  -2    0.55    0.16
  -5   9  -2    0.36    0.17
   5   9   2    0.49    0.16
  -5   9  -2    0.34    0.15
  -7  -9  -2    5.93    0.37
   7  -9   2    4.40    0.36
   7   9   2    4.97    0.36
  -7   9  -2    5.90    0.35
   7   9   2    5.30    0.35
  -7   9  -2    5.28    0.36
   7   9   2    5.56    0.34
  -7   9  -2    4.74    0.33
  -7   9  -2    5.01    0.36
  -7   9  -2    5.03    0.38
  -9  -9  -2    5.31    0.37
   9  -9   2    4.55    0.38
  -9  -9  -2    5.08    0.39
  -9   9  -2    4.61    0.35
   9   9   2    4.97    0.36
  -9   9  -2    4.86    0.38
   9   9   2    4.58    0.38
  -9   9  -2    5.38    0.41
  -9   9  -2    4.72    0.34
  -9   9  -2    4.62    0.36
   9   9   2    5.88    0.35
  11  -9   2    2.63    0.37
 -11  -9  -2    2.72    0.37
 -11  -9  -2    2.54    0.37
 -11   9  -2    2.69    0.35
 -11   9  -2    3.00    0.34
 -11   9  -2    2.99    0.35
 -11   9  -2    3.20    0.39
 -11   9  -2    2.87    0.33
  11   9   2    2.66    0.35
  11   9   2    2.79    0.34
 -13  -9  -2   10.95    0.52
 -13   9  -2    9.44    0.57
  13   9   2    9.87    0.47
 -10 -10   2    0.28    0.17
  10  10  -2    0.67    0.25
  10  10  -2    0.90    0.20
 -10  10   2    0.71    0.23
  10  10  -2    0.20    0.22
  10  10  -2    0.84    0.18
 -10  10   2    0.68    0.22
 -10  10   2    0.62    0.20
   8 -10  -2   -0.08    0.18
  -8 -10   2    0.09    0.17
   8  10  -2   -0.12    0.18
   8  10  -2    0.18    0.19
  -8  10   2   -0.08    0.18
  -8  10   2   -0.01    0.16
   8  10  -2    0.04    0.16
  -8  10   2   -0.09    0.17
  -8  10   2    0.43    0.22
   8  10  -2    0.01    0.19
  -6 -10   2    0.48    0.17
   6 -10  -2    0.17    0.18
  -6 -10   2    0.40    0.19
  -6  10   2    0.93    0.24
   6  10  -2    0.44    0.20
   6  10  -2    0.39    0.18
   6  10  -2    0.32    0.16
  -6  10   2    0.29    0.18
  -6  10   2    0.33    0.18
  -6  10   2    0.51    0.18
   6  10  -2    0.18    0.19
  -4 -10   2    0.08    0.17
   4 -10  -2    0.15    0.17
  -4 -10   2    0.23    0.16
   4  10  -2    0.17    0.18
   4  10  -2    0.21    0.17
  -4  10   2    0.31    0.18
   4  10  -2    0.12    0.19
   4  10  -2    0.18    0.17
  -4  10   2    0.24    0.22
  -4  10   2    0.38    0.18
  -4  10   2    0.44    0.17
   2 -10  -2    1.19    0.20
  -2 -10   2    1.08    0.20
  -2 -10   2    1.21    0.20
  -2  10   2    2.23    0.36
   2  10  -2    1.60    0.22
   2  10  -2    1.43    0.21
   2  10  -2    1.04    0.20
  -2  10   2    1.50    0.21
  -2  10   2    1.49    0.21
  -2  10   2    1.48    0.21
   2  10  -2    1.40    0.19
   0 -10   2    0.13    0.20
   0 -10   2    0.10    0.17
   0 -10  -2    0.28    0.16
   0  10   2    0.05    0.16
   0  10  -2    0.02    0.17
   0  10   2   -0.03    0.19
   0  10   2    0.36    0.18
   0  10  -2    0.33    0.19
   0  10  -2    0.10    0.16
   0  10  -2    0.10    0.18
   0  10   2   -0.26    0.17
   2 -10   2   12.02    0.51
  -2 -10  -2   12.11    0.49
   2 -10   2   11.62    0.52
  -2  10  -2   11.19    0.51
  -2  10  -2   11.25    0.51
  -2  10  -2   11.69    0.47
  -2  10  -2   12.01    0.51
   2  10   2   11.95    0.50
   2  10   2   11.77    0.52
   2  10   2   12.02    0.49
  -4 -10  -2   12.97    0.50
   4 -10   2   12.44    0.55
   4  10   2   12.05    0.52
   4  10   2   12.47    0.53
  -4  10  -2   12.33    0.51
   4  10   2   13.33    0.52
  -4  10  -2   13.29    0.54
  -4  10  -2   12.45    0.54
  -4  10  -2   11.95    0.54
   6 -10   2    0.55    0.19
   6  10   2    0.54    0.19
   6  10   2    0.92    0.19
  -6  10  -2    0.77    0.19
  -6  10  -2    0.70    0.19
  -6  10  -2    0.37    0.18
  -6  10  -2    0.93    0.23
   6  10   2    0.83    0.18
  -6  10  -2    0.70    0.20
  -8 -10  -2    2.65    0.38
  -8  10  -2    1.97    0.30
  -8  10  -2    2.54    0.37
   8  10   2    2.00    0.24
   8  10   2    3.08    0.31
  26   0  -3    3.98    0.38
 -26   0   3    5.89    0.32
 -26   0   3    4.77    0.37
 -26   0   3    4.44    0.37
 -26   0   3    4.57    0.38
 -24   0   3    0.08    0.16
 -24   0   3   -0.07    0.13
 -24   0   3    0.06    0.15
  24   0  -3   -0.15    0.15
 -24   0   3   -0.03    0.15
 -22   0   3   14.71    0.52
  22   0  -3   14.82    0.53
 -22   0   3   14.11    0.49
  20   0  -3   11.82    0.43
 -20   0   3   11.40    0.40
 -20   0   3   12.05    0.43
 -20   0   3   11.49    0.42
 -18   0   3    0.48    0.11
  18   0  -3    0.92    0.12
  18   0  -3    2.17    0.97
  18   0  -3    1.01    0.45
 -18   0   3    0.63    0.11
 -18   0   3    0.89    0.11
 -16   0   3   23.30    0.68
 -16   0   3   24.14    0.62
  16   0  -3   25.36    1.66
 -16   0   3   23.78    0.67
  16   0  -3   23.35    0.68
  16   0  -3   23.16    1.07
 -16   0   3   24.42    0.61
  14   0  -3   11.89    1.04
  14   0  -3   10.19    1.10
 -14   0   3   11.45    0.36
 -14   0   3   12.18    0.31
  14   0  -3   11.43    0.37
  14   0  -3   11.73    0.33
  14   0  -3   11.32    0.68
 -14   0   3   11.70    0.32
  14   0  -3   11.35    0.65
 -14   0   3   12.61    0.32
 -12   0   3   16.48    0.47
  12   0  -3   16.36    0.45
 -12   0   3   16.44    0.44
  12   0  -3   16.33    0.99
 -12   0   3   16.93    0.46
  12   0  -3   16.04    0.70
  12   0  -3   16.82    0.71
  12   0  -3   16.99    0.47
  12   0  -3   16.42    0.97
 -12   0   3   16.92    0.44
  10   0  -3  189.30    5.31
  10   0  -3  213.36    5.53
  10   0  -3  206.39    5.33
  10   0  -3  208.20    5.52
  -8   0   3    0.54    0.05
   8   0  -3    0.38    0.12
  -8   0   3    0.36    0.05
   8   0  -3    0.55    0.23
   8   0  -3    0.48    0.06
  -8   0   3    0.08    0.23
  -8   0   3    0.45    0.04
  -8   0   3    0.42    0.06
   8   0  -3    0.42    0.05
  -8   0   3    0.45    0.03
  -8   0   3    0.31    0.12
  -6   0   3    6.02    0.42
   6   0  -3    6.29    0.29
   6   0  -3    5.78    0.18
  -6   0   3    6.04    0.30
  -6   0   3    6.17    0.20
  -6   0   3    5.86    0.18
   6   0  -3    6.22    0.41
  -6   0   3    6.33    0.18
   6   0  -3    6.16    0.18
   6   0  -3    5.92    0.18
  -6   0   3    6.00    0.18
  -6   0   3    6.50    0.16
  -6   0   3    6.25    0.18
  -4   0   3    4.71    0.14
  -4   0   3    4.15    0.28
   4   0  -3    4.45    0.14
  -4   0   3    4.58    0.14
  -4   0   3    4.48    0.14
   4   0  -3    4.33    0.40
  -4   0   3    5.33    0.13
   4   0  -3    4.36    0.27
  -4   0   3    4.44    0.13
   4   0  -3    4.42    0.14
   4   0  -3    4.51    0.14
  -4   0   3    4.60    0.14
   4   0  -3    4.83    0.12
  -4   0   3    4.67    0.13
  -4   0   3    4.22    0.41
   4   0  -3    4.81    0.13
   4   0  -3    4.44    0.13
  -2   0   3  992.46   25.42
   2   0  -3 1000.00   25.43
   0   0   3   12.28    0.32
   0   0  -3   12.30    0.32
   0   0  -3   10.52    0.56
   0   0   3   12.58    0.31
   0   0   3   12.09    0.32
   0   0  -3   12.45    0.31
   0   0  -3   11.92    0.32
   0   0   3   11.70    0.85
   0   0  -3   12.04    0.32
   0   0   3   11.88    0.32
   0   0   3   10.89    0.58
   0   0  -3   12.49    0.32
   0   0   3   12.24    0.32
   0   0  -3   11.57    0.31
   0   0   3   11.89    0.32
   2   0   3   12.88    0.33
   2   0   3   11.96    0.67
  -2   0  -3   12.54    0.33
   2   0   3   12.32    0.98
  -2   0  -3   12.56    0.33
  -2   0  -3   12.24    0.34
  -2   0  -3   12.31    0.65
  -2   0  -3   12.46    0.34
   2   0   3   13.80    0.35
  -2   0  -3   12.44    0.33
  -2   0  -3   12.45    0.34
  -2   0  -3   12.88    0.91
  -2   0  -3   11.71    0.34
   2   0   3   12.42    0.33
   2   0   3   12.62    0.34
   4   0   3   71.06    1.86
   4   0   3   76.58    2.76
  -4   0  -3   74.82    1.85
   4   0   3   72.03    1.86
   4   0   3   76.41    2.34
  -4   0  -3   72.30    1.86
  -4   0  -3   72.99    2.31
   4   0   3   71.38    1.85
  -4   0  -3   72.54    1.86
  -4   0  -3   70.10    2.66
  -4   0  -3   73.13    1.85
  -4   0  -3   72.96    1.86
  -6   0  -3    9.53    0.28
   6   0   3   10.07    0.25
   6   0   3    9.25    1.20
  -6   0  -3    9.64    0.29
   6   0   3    9.40    0.76
   6   0   3    9.43    0.28
  -6   0  -3    9.74    0.26
   6   0   3    9.76    0.26
  -6   0  -3    9.09    0.69
   6   0   3    9.19    0.28
   6   0   3    9.57    0.26
  -6   0  -3    9.94    1.07
  -6   0  -3    9.67    0.29
  -6   0  -3    9.50    0.29
   8   0   3   77.90    2.08
  -8   0  -3   80.09    2.08
   8   0   3   85.05    2.78
   8   0   3   85.79    3.42
  -8   0  -3   85.85    2.06
  -8   0  -3   82.87    2.08
   8   0   3   80.31    2.06
   8   0   3   81.30    2.05
  -8   0  -3   75.70    3.18
  -8   0  -3   78.96    2.08
   8   0   3   85.34    2.04
   8   0   3   77.22    2.09
  -8   0  -3   79.80    2.70
 -10   0  -3  156.63    4.60
 -10   0  -3  151.29    5.28
 -10   0  -3  143.91    3.73
  10   0   3  142.34    3.73
 -10   0  -3  142.51    3.73
  10   0   3  145.71    3.69
 -10   0  -3  145.79    3.72
 -10   0  -3  143.72    3.71
 -12   0  -3   28.97    1.69
 -12   0  -3   34.45    0.88
  12   0   3   33.43    1.72
 -12   0  -3   33.31    0.89
  12   0   3   32.67    0.90
 -12   0  -3   32.05    0.89
 -12   0  -3   31.62    2.56
 -12   0  -3   32.97    0.89
 -12   0  -3   33.16    0.90
  12   0   3   29.91    2.45
 -14   0  -3   45.77    1.25
 -14   0  -3   45.92    1.24
  14   0   3   46.06    1.25
 -14   0  -3   45.39    1.24
 -14   0  -3   46.29    1.24
 -14   0  -3   46.27    1.22
 -16   0  -3   37.38    1.00
 -16   0  -3   35.86    1.03
 -16   0  -3   36.99    1.04
  16   0   3   36.59    1.04
 -16   0  -3   37.31    1.02
 -16   0  -3   36.86    1.04
 -18   0  -3   40.93    1.12
 -18   0  -3   40.25    1.10
 -18   0  -3   38.97    1.17
 -18   0  -3   40.31    1.14
 -18   0  -3   39.93    1.14
 -20   0  -3    0.62    0.17
 -20   0  -3    0.65    0.17
 -20   0  -3    0.72    0.18
 -20   0  -3    0.52    0.15
 -22   0  -3   13.10    0.55
 -22   0  -3   12.79    0.54
 -22   0  -3   13.36    0.55
 -22   0  -3   13.44    0.51
 -27  -1   3    1.21    0.18
 -27   1   3    0.90    0.19
 -25  -1   3    2.41    0.29
 -25  -1   3    2.14    0.25
 -25  -1   3    2.11    0.31
  25   1  -3    1.64    0.22
 -25   1   3    1.54    0.20
 -25   1   3    1.61    0.22
 -25   1   3    2.69    0.30
  23  -1  -3    2.13    0.28
 -23  -1   3    2.24    0.28
 -23  -1   3    2.35    0.28
 -23  -1   3    2.32    0.26
 -23   1   3    2.56    0.28
 -23   1   3    1.91    0.25
  23   1  -3    2.32    0.29
 -23   1   3    2.47    0.23
 -23   1   3    2.04    0.27
 -21  -1   3   20.53    0.87
  21  -1  -3   22.85    0.69
 -21  -1   3   22.10    0.67
 -21  -1   3   22.39    0.69
  21   1  -3   23.30    0.70
 -21   1   3   22.02    0.68
 -21   1   3   21.30    0.79
 -21   1   3   23.17    0.69
 -21   1   3   22.24    0.65
 -19  -1   3   21.95    0.65
  19  -1  -3   21.64    0.66
  19  -1  -3   19.45    0.87
 -19  -1   3   22.13    0.66
  19  -1  -3   22.97    0.61
  19   1  -3   22.66    0.67
 -19   1   3   22.42    0.67
 -19   1   3   22.87    0.63
 -19   1   3   21.78    0.65
 -19   1   3   21.80    0.67
  17  -1  -3    7.59    0.30
  17  -1  -3    7.65    0.24
  17  -1  -3    8.76    0.95
  17  -1  -3    6.74    0.53
 -17  -1   3    7.92    0.29
  17  -1  -3    8.11    1.08
 -17  -1   3    7.74    0.21
  17  -1  -3    7.76    0.59
 -17  -1   3    7.18    0.29
 -17   1   3    7.36    0.26
  17   1  -3    7.16    1.28
 -17   1   3    7.37    0.29
 -17   1   3    6.85    0.29
  17   1  -3    7.19    0.32
 -17   1   3    7.20    0.22
 -17   1   3    7.22    0.29
  17   1  -3    7.41    1.20
  17   1  -3    7.65    0.90
  17   1  -3    6.98    0.85
  15  -1  -3   64.24    1.71
 -15  -1   3   67.29    1.67
  15  -1  -3   64.58    1.69
 -15  -1   3   58.40    1.65
  15  -1  -3   65.70    1.87
  15  -1  -3   66.35    1.85
  15  -1  -3   65.99    2.11
 -15  -1   3   67.81    1.72
  15  -1  -3   64.36    2.06
 -15  -1   3   65.00    1.72
 -15   1   3   67.38    1.70
  15   1  -3   66.57    1.72
 -15   1   3   66.46    1.66
 -15   1   3   67.34    1.66
  15   1  -3   62.27    2.78
  15   1  -3   68.49    2.24
 -15   1   3   66.16    1.71
 -15   1   3   66.04    1.72
  15   1  -3   64.79    2.76
  15   1  -3   67.45    2.23
 -13  -1   3   12.31    0.32
  13  -1  -3   10.51    0.46
  13  -1  -3   11.18    0.46
  13  -1  -3   10.89    0.64
  13  -1  -3   11.97    0.34
 -13  -1   3   11.80    0.36
 -13  -1   3   11.68    0.36
  13  -1  -3   11.65    0.36
  13  -1  -3   11.29    0.67
  13  -1  -3   11.47    0.67
 -13  -1   3   12.42    0.31
 -13   1   3   12.41    0.32
 -13   1   3   11.97    0.34
 -13   1   3   11.90    0.35
  13   1  -3   12.03    1.22
  13   1  -3   13.13    1.27
 -13   1   3   11.63    0.36
  13   1  -3   11.48    0.76
  13   1  -3   11.69    0.77
  13   1  -3   12.13    0.37
 -11  -1   3   23.40    0.63
 -11  -1   3   24.01    0.61
 -11  -1   3   24.43    0.60
  11  -1  -3   23.63    0.63
  11  -1  -3   23.35    0.62
  11  -1  -3   23.67    0.62
 -11  -1   3   23.66    0.60
  11   1  -3   22.36    0.97
 -11   1   3   22.44    0.62
 -11   1   3   22.97    0.60
 -11   1   3   22.85    0.63
  11   1  -3   21.47    1.30
  11   1  -3   22.61    0.63
 -11   1   3   22.79    0.61
  -9  -1   3  191.16    5.43
  -9  -1   3  195.47    5.15
  -9  -1   3  185.39    4.83
   9   1  -3  191.23    5.45
   9   1  -3  193.16    5.15
  -7  -1   3   14.28    0.38
  -7  -1   3   13.18    0.65
  -7  -1   3   15.05    0.39
   7  -1  -3   13.06    0.39
  -7  -1   3   13.75    0.38
  -7  -1   3   13.64    0.39
  -7  -1   3   14.27    0.37
   7  -1  -3   13.65    0.39
  -7  -1   3   12.45    0.89
   7  -1  -3   13.61    0.39
   7   1  -3   14.38    0.39
   7   1  -3   15.84    0.39
   7   1  -3   14.91    0.37
  -7   1   3   15.19    0.39
   7   1  -3   14.33    0.88
  -7   1   3   16.22    0.40
   7   1  -3   14.44    0.40
  -7   1   3   15.07    0.38
   7   1  -3   14.75    0.38
   7   1  -3   14.40    0.65
   7   1  -3   15.26    0.38
  -7   1   3   14.72    0.38
   7   1  -3   14.81    0.40
  -5  -1   3  760.98   19.28
  -5   1   3  711.85   18.90
   5   1  -3  766.58   19.27
  -3  -1   3   81.56    1.99
  -3  -1   3   79.36    2.53
  -3  -1   3   82.97    1.99
   3  -1  -3   82.54    1.98
  -3  -1   3   81.78    2.28
  -3  -1   3   75.55    1.99
   3  -1  -3   79.15    2.37
   3  -1  -3   80.67    1.98
  -3  -1   3   79.53    1.99
  -3  -1   3   80.66    1.99
   3  -1  -3   79.31    2.19
   3  -1  -3   71.41    1.99
   3  -1  -3   70.98    1.99
  -3   1   3   80.45    1.99
   3   1  -3   80.54    1.99
   3   1  -3   77.97    1.99
   3   1  -3   74.14    1.98
   3   1  -3   80.00    2.27
   3   1  -3   80.41    1.99
  -3   1   3   76.52    2.18
  -3   1   3   77.03    1.99
   3   1  -3   74.41    1.99
  -3   1   3   84.48    1.99
  -3   1   3   75.87    2.35
   3   1  -3   76.38    2.50
  -1  -1   3   60.12    1.52
  -1  -1   3   58.00    1.52
  -1  -1   3   58.31    1.83
   1  -1  -3   61.70    1.81
   1  -1  -3   57.91    1.52
   1  -1  -3   62.03    1.52
   1  -1  -3   63.26    1.52
  -1  -1   3   60.78    1.52
  -1  -1   3   63.09    1.52
   1  -1  -3   58.37    1.53
  -1  -1   3   61.93    1.52
   1  -1  -3   62.34    2.07
   1  -1  -3   58.37    1.52
   1  -1  -3   56.45    1.52
  -1  -1   3   61.56    1.53
  -1  -1   3   58.54    2.10
   1   1  -3   60.23    1.52
  -1   1   3   59.92    1.52
  -1   1   3   61.19    1.81
  -1   1   3   58.69    1.53
   1   1  -3   58.85    1.52
  -1   1   3   54.65    1.52
  -1   1   3   61.06    1.53
   1   1  -3   61.61    1.84
  -1   1   3   62.42    2.08
   1   1  -3   60.17    1.52
   1   1  -3   59.05    1.53
   1   1  -3   57.88    1.52
   1   1  -3   63.20    2.13
   1   1  -3   57.04    1.52
  -1   1   3   62.02    1.52
  -1   1   3   61.59    1.52
   1  -1   3   78.95    2.39
   1  -1   3   84.35    2.02
  -1  -1  -3   75.97    2.02
   1  -1   3   82.46    2.02
  -1  -1  -3   78.92    2.71
  -1  -1  -3   78.62    2.02
  -1  -1  -3   79.26    2.39
  -1  -1  -3   80.20    2.01
   1  -1   3   80.02    2.02
   1  -1   3   82.67    2.02
   1  -1   3   82.20    2.73
  -1  -1  -3   75.32    2.02
   1  -1   3   82.06    2.01
   1  -1   3   76.97    2.02
   1   1   3   80.25    2.40
   1   1   3   74.75    2.02
  -1   1  -3   81.52    2.01
  -1   1  -3   77.16    2.68
   1   1   3   82.69    2.02
   1   1   3   78.91    2.01
  -1   1  -3   76.66    2.02
   1   1   3   83.12    2.03
  -1   1  -3   78.69    2.02
   1   1   3   75.02    2.02
  -1   1  -3   76.70    2.02
  -1   1  -3   81.75    2.02
  -1   1  -3   78.57    2.37
  -1   1  -3   78.49    2.02
   1   1   3   81.97    2.74
   1   1   3   86.07    2.03
  -3  -1  -3  146.97    4.29
   3  -1   3  143.46    4.24
  -3  -1  -3  128.25    3.34
  -3  -1  -3  143.73    3.85
   3  -1   3  146.48    3.83
  -3  -1  -3  126.53    3.34
   3   1   3  134.25    4.25
  -3   1  -3  135.91    3.80
   3   1   3  125.02    3.34
  -3   1  -3  121.87    3.35
   3   1   3  118.75    3.35
  -3   1  -3  123.74    3.35
  -3   1  -3  134.55    4.18
   3   1   3  129.87    3.81
   5  -1   3    9.68    0.72
  -5  -1  -3   10.48    0.30
  -5  -1  -3   10.35    0.30
  -5  -1  -3   10.89    0.74
  -5  -1  -3   11.72    1.15
  -5  -1  -3   10.73    0.30
   5  -1   3   10.12    1.13
   5  -1   3   10.86    0.27
   5  -1   3   10.46    0.29
   5  -1   3   10.52    0.29
  -5  -1  -3   11.34    0.27
   5   1   3    8.85    0.76
   5   1   3    9.96    0.27
  -5   1  -3    9.98    0.28
   5   1   3    9.67    0.29
   5   1   3   10.43    0.28
  -5   1  -3    9.82    0.30
   5   1   3   10.14    0.26
  -5   1  -3    9.21    0.95
  -5   1  -3    9.60    0.65
  -5   1  -3    9.62    0.29
   5   1   3    8.43    1.20
   5   1   3   10.00    0.30
  -5   1  -3    9.61    0.30
  -5   1  -3    9.91    0.30
  -7  -1  -3    7.98    0.26
   7  -1   3    8.00    0.24
  -7  -1  -3    7.82    0.77
  -7  -1  -3    8.29    0.22
  -7  -1  -3    8.84    1.24
   7  -1   3    8.37    0.24
  -7  -1  -3    7.76    0.25
   7  -1   3    8.23    0.22
  -7  -1  -3    8.03    0.26
  -7   1  -3    8.41    0.24
   7   1   3    7.95    0.25
   7   1   3    8.21    0.22
  -7   1  -3    8.31    0.68
  -7   1  -3    8.31    1.04
   7   1   3    8.60    0.84
   7   1   3    6.72    1.11
   7   1   3    8.62    0.23
  -7   1  -3    8.35    0.25
  -7   1  -3    8.21    0.26
   7   1   3    8.23    0.26
  -7   1  -3    8.04    0.26
  -7   1  -3    8.22    0.26
   9  -1   3   65.18    3.04
   9  -1   3   66.97    2.45
   9  -1   3   71.12    1.78
   9  -1   3   72.28    1.79
  -9  -1  -3   71.74    1.81
  -9  -1  -3   70.82    1.82
  -9  -1  -3   70.53    1.82
   9   1   3   66.79    1.80
   9   1   3   71.59    1.77
   9   1   3   69.50    1.77
  -9   1  -3   69.91    1.81
   9   1   3   73.16    2.61
  -9   1  -3   70.51    1.80
  -9   1  -3   68.16    2.44
   9   1   3   70.64    3.32
  -9   1  -3   69.14    1.81
  -9   1  -3   70.76    1.81
  -9   1  -3   70.46    1.79
   9   1   3   68.48    1.81
  -9   1  -3   68.78    3.05
 -11  -1  -3   51.27    1.25
  11  -1   3   49.76    2.02
  11  -1   3   49.79    2.74
  11  -1   3   48.52    1.22
  11  -1   3   47.36    1.22
 -11  -1  -3   48.79    1.26
 -11  -1  -3   48.23    1.27
 -11  -1  -3   47.57    1.26
 -11   1  -3   47.76    1.25
  11   1   3   44.61    3.01
 -11   1  -3   46.65    1.26
 -11   1  -3   42.55    1.95
 -11   1  -3   48.22    1.27
 -11   1  -3   44.38    2.70
 -11   1  -3   48.25    1.23
 -11   1  -3   44.79    1.26
  11   1   3   47.37    2.16
  11   1   3   48.39    2.09
  11   1   3   45.74    2.91
  11   1   3   46.31    1.26
  11   1   3   46.63    1.25
 -13  -1  -3   10.00    0.37
 -13  -1  -3   10.42    0.35
  13  -1   3    6.25    1.60
 -13  -1  -3   10.14    0.36
 -13  -1  -3   10.39    0.36
  13  -1   3   11.05    0.30
  13  -1   3    9.26    1.25
 -13   1  -3   13.82    1.98
  13   1   3   10.60    0.37
 -13   1  -3   10.83    0.37
 -13   1  -3   10.83    0.37
  13   1   3   10.51    1.26
 -13   1  -3   12.23    1.28
  13   1   3   10.01    0.37
  13   1   3    8.22    1.78
 -13   1  -3   10.95    0.38
 -13   1  -3   11.54    0.35
 -15  -1  -3   19.54    0.60
 -15  -1  -3   18.97    0.59
 -15  -1  -3   19.89    0.58
 -15  -1  -3   19.48    0.59
 -15   1  -3   19.37    0.58
 -15   1  -3   17.96    0.59
 -15   1  -3   19.25    0.60
 -15   1  -3   19.83    0.55
 -15   1  -3   19.37    0.60
  15   1   3   19.32    0.60
 -17  -1  -3   30.55    0.87
 -17  -1  -3   31.14    0.89
 -17  -1  -3   30.90    0.89
 -17  -1  -3   29.98    0.94
  17   1   3   31.65    0.90
 -17   1  -3   29.37    0.89
 -17   1  -3   31.35    0.85
 -17   1  -3   29.99    0.90
 -17   1  -3   31.16    0.87
 -17   1  -3   30.97    0.90
 -19  -1  -3    6.32    0.35
 -19  -1  -3    6.20    0.36
 -19  -1  -3    6.76    0.37
 -19  -1  -3    6.64    0.32
 -19  -1  -3    6.30    0.31
 -19   1  -3    6.22    0.31
 -19   1  -3    5.84    0.34
  19   1   3    6.39    0.36
 -19   1  -3    6.18    0.35
 -19   1  -3    6.16    0.36
 -21  -1  -3    7.33    0.38
 -21  -1  -3    7.38    0.41
 -21  -1  -3    6.67    0.40
 -21  -1  -3    7.83    0.40
 -21  -1  -3    6.72    0.35
 -21   1  -3    6.67    0.34
 -21   1  -3    6.31    0.39
 -21   1  -3    6.57    0.48
 -21   1  -3    7.20    0.41
 -23  -1  -3    6.75    0.39
 -26  -2   3    1.81    0.24
 -26  -2   3    1.87    0.22
 -26  -2   3    1.75    0.24
 -26   2   3    1.90    0.22
 -26   2   3    2.35    0.33
 -26   2   3    2.85    0.44
  26   2  -3    2.48    0.34
 -24  -2   3    0.55    0.17
 -24  -2   3    0.84    0.17
 -24  -2   3    0.63    0.19
 -24   2   3    0.85    0.17
  24   2  -3    0.50    0.18
 -24   2   3    0.95    0.19
 -24   2   3    0.74    0.15
 -24   2   3    0.73    0.19
 -22  -2   3    9.11    0.40
 -22  -2   3    9.93    0.41
 -22   2   3    9.71    0.42
 -22   2   3    9.70    0.39
 -22   2   3    9.90    0.41
  22   2  -3    9.51    0.41
 -22   2   3    9.53    0.41
  20  -2  -3   15.14    0.48
 -20  -2   3   14.33    0.50
 -20  -2   3   14.67    0.49
 -20   2   3   14.30    0.44
 -20   2   3   14.68    0.51
  20   2  -3   14.47    0.50
 -20   2   3   14.26    0.49
 -20   2   3   14.42    0.48
  18  -2  -3    2.44    0.21
 -18  -2   3    2.52    0.21
  18  -2  -3    2.66    0.17
 -18  -2   3    2.54    0.21
 -18   2   3    2.67    0.19
 -18   2   3    2.68    0.22
 -18   2   3    2.47    0.15
  18   2  -3    2.58    0.22
 -18   2   3    2.29    0.21
 -16  -2   3   12.69    0.35
 -16  -2   3   12.02    0.41
  16  -2  -3   11.93    0.40
 -16  -2   3   12.49    0.41
  16  -2  -3   12.41    0.38
 -16   2   3   13.00    0.33
  16   2  -3   12.26    1.09
  16   2  -3   14.44    2.14
 -16   2   3   12.27    0.39
  16   2  -3   13.32    1.14
 -16   2   3   12.39    0.36
  16   2  -3   11.56    1.94
 -16   2   3   12.25    0.40
  16   2  -3   12.37    0.41
 -16   2   3   12.05    0.47
  14  -2  -3   39.49    1.05
  14  -2  -3   40.36    1.04
 -14  -2   3   40.75    1.06
 -14  -2   3   40.17    1.04
 -14  -2   3   39.75    1.06
 -14   2   3   39.55    1.05
  14   2  -3   37.26    1.66
  14   2  -3   37.77    1.68
 -14   2   3   39.83    1.01
  14   2  -3   36.65    2.35
  14   2  -3   39.75    1.06
 -14   2   3   39.78    1.02
  14   2  -3   39.49    1.02
  14   2  -3   35.97    2.27
 -14   2   3   38.88    1.06
  12  -2  -3   10.51    0.31
  12  -2  -3    9.91    0.31
 -12  -2   3    9.99    0.29
  12  -2  -3   10.47    0.29
 -12  -2   3    9.57    1.35
 -12  -2   3   10.42    0.26
 -12  -2   3    9.92    0.32
 -12  -2   3   10.64    0.82
  12   2  -3    9.18    0.80
 -12   2   3   10.23    0.28
 -12   2   3   10.11    0.30
 -12   2   3    9.90    0.30
 -12   2   3    8.71    0.33
 -12   2   3    9.81    0.32
  12   2  -3    9.97    0.30
  12   2  -3    7.57    1.32
  12   2  -3   10.06    0.32
  12   2  -3    9.74    0.28
  10  -2  -3   37.59    0.99
 -10  -2   3   37.30    0.94
 -10  -2   3   35.78    0.95
  10  -2  -3   36.10    0.97
  10  -2  -3   37.54    1.05
  10  -2  -3   35.53    0.95
 -10  -2   3   36.36    0.94
  10  -2  -3   34.55    0.96
 -10  -2   3   36.12    0.97
 -10   2   3   37.58    0.94
  10   2  -3   36.20    1.88
  10   2  -3   36.77    0.96
  10   2  -3   36.85    0.94
  10   2  -3   38.56    0.94
 -10   2   3   37.51    0.97
  10   2  -3   36.72    0.97
  10   2  -3   36.42    1.44
 -10   2   3   37.29    0.96
 -10   2   3   37.48    0.95
 -10   2   3   36.65    0.96
  -8  -2   3    7.78    0.20
  -8  -2   3    6.80    0.62
  -8  -2   3    7.48    0.21
   8  -2  -3    7.35    0.21
   8  -2  -3    7.72    0.50
  -8  -2   3    7.26    0.23
  -8  -2   3    7.97    0.19
   8  -2  -3    6.68    0.22
  -8  -2   3    8.26    1.03
   8  -2  -3    7.75    0.33
   8  -2  -3    7.43    0.21
  -8  -2   3    7.72    0.20
  -8   2   3    6.65    0.22
   8   2  -3    5.87    0.56
  -8   2   3    6.36    0.48
   8   2  -3    6.50    0.22
   8   2  -3    5.69    0.92
  -8   2   3    6.54    0.21
   8   2  -3    6.73    0.23
  -8   2   3    6.74    0.21
   8   2  -3    6.59    0.21
  -8   2   3    6.47    0.32
  -8   2   3    6.68    0.21
   8   2  -3    7.06    0.20
  -8   2   3    6.76    0.20
   8   2  -3    6.87    0.19
  -8   2   3    6.66    0.19
   6  -2  -3   31.72    0.97
   6  -2  -3   29.03    0.78
  -6  -2   3   32.74    0.79
  -6  -2   3   28.50    1.18
  -6  -2   3   27.79    1.55
  -6  -2   3   30.01    0.78
   6  -2  -3   30.47    1.15
  -6  -2   3   29.70    0.77
   6  -2  -3   29.64    0.79
   6  -2  -3   31.54    0.78
  -6  -2   3   30.31    0.76
  -6   2   3   29.89    0.78
  -6   2   3   29.51    0.78
  -6   2   3   30.51    0.97
  -6   2   3   29.72    0.78
   6   2  -3   30.36    0.77
  -6   2   3   29.06    1.17
   6   2  -3   30.26    1.52
   6   2  -3   30.37    0.79
  -6   2   3   31.49    0.77
   6   2  -3   29.94    0.79
  -6   2   3   29.46    0.78
   6   2  -3   30.26    0.77
  -6   2   3   30.62    0.78
   6   2  -3   29.79    0.78
  -6   2   3   30.12    0.79
  -6   2   3   30.71    0.77
  -6   2   3   29.43    0.77
   6   2  -3   27.41    1.15
   4  -2  -3  116.67    3.39
   4  -2  -3  137.12    3.91
  -4  -2   3  134.12    4.22
   4  -2  -3  136.57    3.38
  -4  -2   3  135.87    3.39
   4  -2  -3  138.34    3.66
  -4  -2   3  133.42    3.81
  -4   2   3  141.78    3.67
   4   2  -3  136.92    4.19
   4   2  -3  127.00    3.39
  -4   2   3  132.38    3.39
   4   2  -3  136.03    3.39
  -4   2   3  126.84    3.39
  -4   2   3  142.20    3.93
   4   2  -3  139.85    3.83
  -2  -2   3   38.35    1.05
   2  -2  -3   38.96    1.05
   2  -2  -3   43.69    1.04
  -2  -2   3   38.66    1.05
  -2  -2   3   41.91    1.47
  -2  -2   3   41.77    1.85
   2  -2  -3   41.05    1.05
   2  -2  -3   40.36    1.04
   2  -2  -3   38.92    1.04
  -2  -2   3   41.27    1.05
   2  -2  -3   38.45    1.05
   2  -2  -3   38.03    1.03
  -2  -2   3   40.73    1.04
   2   2  -3   40.94    1.05
  -2   2   3   42.46    1.04
  -2   2   3   40.69    1.05
  -2   2   3   41.47    1.03
   2   2  -3   39.68    1.05
   2   2  -3   40.50    1.06
  -2   2   3   41.66    1.04
  -2   2   3   40.96    1.05
   2   2  -3   45.33    1.49
   2   2  -3   40.90    1.05
   2   2  -3   45.83    1.86
   2   2  -3   41.04    1.04
  -2   2   3   41.62    1.06
  -2   2   3   42.05    1.03
   0  -2   3   18.76    0.48
   0  -2  -3   19.30    0.48
   0  -2   3   17.08    0.89
   0  -2  -3   18.05    0.48
   0  -2  -3   17.96    0.49
   0  -2  -3   18.10    0.47
   0  -2  -3   18.48    0.47
   0  -2   3   17.38    1.30
   0  -2   3   18.48    0.47
   0  -2   3   17.70    0.48
   0  -2  -3   17.77    0.48
   0   2  -3   17.80    0.49
   0   2   3   18.58    0.49
   0   2   3   15.74    0.83
   0   2   3   19.69    0.49
   0   2  -3   17.63    1.19
   0   2  -3   18.78    0.49
   0   2   3   18.58    0.49
   0   2   3   17.97    1.13
   0   2   3   18.34    0.48
   0   2   3   18.28    0.47
   0   2   3   18.24    0.84
   0   2   3   14.86    1.14
   0   2  -3   17.99    0.87
   0   2  -3   18.30    0.47
   0   2  -3   18.87    0.49
   0   2   3   18.69    0.48
   0   2   3   17.81    0.49
   0   2   3   20.00    0.48
   2  -2   3  120.50    3.99
  -2  -2  -3  122.42    3.09
  -2  -2  -3  122.07    3.09
  -2  -2  -3  124.88    3.08
  -2  -2  -3  128.09    3.08
   2  -2   3  123.58    3.08
   2  -2   3  120.37    3.56
   2  -2   3  125.28    3.08
   2   2   3  120.43    3.09
   2   2   3  121.64    3.59
  -2   2  -3  120.04    3.95
   2   2   3  127.58    3.63
  -2   2  -3  117.65    3.09
  -2   2  -3  119.85    3.55
  -2   2  -3  119.94    3.09
   2   2   3  122.02    4.08
   2   2   3  118.72    4.01
  -4  -2  -3   28.81    0.74
   4  -2   3   28.22    0.76
  -4  -2  -3   29.53    0.77
   4  -2   3   28.95    0.75
   4  -2   3   28.27    1.69
  -4  -2  -3   29.21    0.76
   4  -2   3   29.89    0.76
  -4  -2  -3   30.02    0.76
   4  -2   3   28.44    1.25
   4   2   3   31.36    0.74
   4   2   3   31.20    1.36
  -4   2  -3   28.34    0.73
   4   2   3   28.62    1.88
  -4   2  -3   29.24    0.77
  -4   2  -3   28.54    0.75
   4   2   3   29.03    0.76
  -4   2  -3   28.65    0.76
  -4   2  -3   27.42    1.20
  -4   2  -3   29.14    0.75
  -4   2  -3   28.51    0.76
   4   2   3   28.42    0.76
  -4   2  -3   28.79    1.61
   4   2   3   26.17    1.72
   4   2   3   25.44    1.24
   4   2   3   28.69    0.76
   4   2   3   29.28    0.74
   6  -2   3   27.22    0.77
   6  -2   3   29.11    0.75
  -6  -2  -3   28.13    0.78
  -6  -2  -3   28.87    0.77
  -6  -2  -3   28.47    0.77
   6  -2   3   28.48    0.77
  -6   2  -3   29.99    0.75
  -6   2  -3   28.96    0.74
  -6   2  -3   28.57    0.76
   6   2   3   29.29    1.38
  -6   2  -3   30.48    1.30
  -6   2  -3   29.18    1.69
  -6   2  -3   29.17    0.78
  -6   2  -3   28.41    0.77
  -6   2  -3   28.30    0.78
   6   2   3   30.13    1.46
   6   2   3   29.20    0.78
   6   2   3   28.81    0.77
   6   2   3   32.05    2.04
   6   2   3   28.44    0.74
   6   2   3   30.38    2.13
   6   2   3   28.37    0.77
   6   2   3   30.38    0.73
   8  -2   3   12.02    0.36
  -8  -2  -3   11.72    0.39
   8  -2   3   12.46    0.33
   8  -2   3   11.63    0.92
   8  -2   3   12.04    0.36
  -8  -2  -3   12.84    0.38
   8  -2   3   10.22    1.45
  -8  -2  -3   12.12    0.38
  -8   2  -3   13.25    0.34
   8   2   3   12.80    0.33
   8   2   3   12.26    1.15
  -8   2  -3   13.43    0.33
   8   2   3   12.16    0.37
  -8   2  -3   12.61    0.38
   8   2   3   14.20    2.03
  -8   2  -3   12.50    0.91
   8   2   3   12.66    1.02
   8   2   3   12.63    0.37
  -8   2  -3   12.08    0.38
  -8   2  -3   12.40    0.40
   8   2   3   14.21    1.71
  -8   2  -3   14.29    1.44
  -8   2  -3   12.91    0.36
 -10  -2  -3   11.68    0.39
  10  -2   3   11.17    1.03
  10  -2   3   12.41    0.36
 -10  -2  -3   11.71    0.39
  10  -2   3   11.71    1.77
 -10  -2  -3   11.28    0.39
  10  -2   3   12.01    0.36
 -10   2  -3   13.29    0.37
 -10   2  -3   11.84    1.79
 -10   2  -3   13.51    0.35
 -10   2  -3   13.33    0.40
  10   2   3   14.07    2.35
  10   2   3   12.29    2.02
 -10   2  -3   12.91    0.40
  10   2   3   12.81    1.32
 -10   2  -3   12.89    0.40
  10   2   3   13.14    0.39
  10   2   3   13.28    1.17
  10   2   3   12.98    0.39
 -10   2  -3   12.74    1.05
  12  -2   3    5.27    0.24
  12  -2   3    5.37    0.19
 -12  -2  -3    6.06    0.25
 -12  -2  -3    5.85    0.25
  12  -2   3    5.50    1.53
 -12  -2  -3    5.50    0.25
  12  -2   3    4.96    0.83
 -12   2  -3    5.50    0.25
 -12   2  -3    5.93    1.10
 -12   2  -3    5.47    0.21
  12   2   3    5.62    0.25
 -12   2  -3    7.36    1.64
 -12   2  -3    5.79    0.18
  12   2   3    3.52    0.87
  12   2   3    5.45    0.23
 -12   2  -3    5.41    0.25
  12   2   3    6.44    1.21
  12   2   3    6.81    1.87
 -12   2  -3    5.25    0.25
  12   2   3    4.04    1.50
 -14  -2  -3    5.00    0.26
 -14  -2  -3    4.71    0.25
  14  -2   3    5.02    0.18
 -14  -2  -3    4.74    0.26
 -14  -2  -3    4.87    0.25
 -14   2  -3    4.63    0.26
  14   2   3    4.99    0.26
 -14   2  -3    4.99    0.27
  14   2   3    5.04    0.24
 -14   2  -3    5.18    0.26
 -14   2  -3    5.21    0.22
 -14   2  -3    5.22    0.17
 -16  -2  -3   25.91    0.76
 -16  -2  -3   25.44    0.75
 -16  -2  -3   25.60    0.77
 -16  -2  -3   25.50    0.75
 -16   2  -3   25.46    0.76
 -16   2  -3   25.08    0.76
 -16   2  -3   25.74    0.72
  16   2   3   25.91    0.74
 -16   2  -3   25.18    0.77
  16   2   3   24.76    0.76
 -18  -2  -3    8.39    0.39
 -18  -2  -3    7.44    0.47
 -18  -2  -3    8.55    0.38
 -18  -2  -3    8.33    0.49
 -18   2  -3    9.35    0.40
 -18   2  -3    8.96    0.34
 -18   2  -3    8.78    0.39
 -18   2  -3    9.16    0.40
  18   2   3    8.91    0.39
 -20  -2  -3    1.03    0.19
 -20  -2  -3    0.93    0.19
 -20  -2  -3    0.97    0.16
 -20  -2  -3    0.93    0.16
  20   2   3    1.12    0.19
 -20   2  -3    1.35    0.21
 -20   2  -3    0.86    0.19
 -20   2  -3    1.20    0.18
 -22  -2  -3    0.50    0.21
 -22  -2  -3    0.78    0.21
 -22  -2  -3    0.14    0.16
 -22  -2  -3    0.39    0.17
 -22  -2  -3    0.77    0.22
 -22   2  -3    0.73    0.19
  22   2   3    0.46    0.19
 -22   2  -3    1.05    0.19
 -22   2  -3    0.28    0.18
 -25  -3   3    1.21    0.21
 -25  -3   3    1.29    0.20
 -25   3   3    1.52    0.22
  25   3  -3    1.34    0.22
 -25   3   3    1.23    0.20
 -25   3   3    0.99    0.18
 -25   3   3    1.31    0.18
 -23  -3   3    5.88    0.35
 -23  -3   3    5.84    0.36
 -23   3   3    6.07    0.37
 -23   3   3    6.16    0.33
 -23   3   3    5.57    0.37
  23   3  -3    6.19    0.37
 -23   3   3    6.20    0.31
 -21  -3   3    9.16    0.40
 -21  -3   3    9.18    0.41
 -21   3   3   10.02    0.38
  21   3  -3    9.94    0.42
 -21   3   3   10.34    0.42
 -21   3   3    9.47    0.37
 -21   3   3    9.68    0.42
 -19  -3   3    7.60    0.34
  19  -3  -3    8.09    0.32
 -19  -3   3    7.83    0.34
 -19   3   3    7.89    0.31
 -19   3   3    8.08    0.31
  19   3  -3    7.84    0.35
 -19   3   3    8.17    0.35
 -19   3   3    7.74    0.35
 -17  -3   3    3.64    0.14
 -17  -3   3    3.69    0.23
  17  -3  -3    3.56    0.21
 -17  -3   3    3.43    0.24
 -17   3   3    3.51    0.23
 -17   3   3    3.30    0.23
 -17   3   3    3.32    0.19
 -17   3   3    3.74    0.20
  17   3  -3    3.45    0.23
  17   3  -3    3.72    0.15
 -17   3   3    3.64    0.13
 -15  -3   3   25.87    0.65
 -15  -3   3   24.97    0.66
 -15  -3   3   23.85    0.71
  15  -3  -3   25.09    0.70
 -15  -3   3   25.57    0.75
  15   3  -3   24.81    0.66
  15   3  -3   17.27    2.42
  15   3  -3   24.89    0.71
  15   3  -3   22.80    2.61
 -15   3   3   24.77    0.71
  15   3  -3   24.01    1.55
 -15   3   3   24.72    0.70
 -15   3   3   25.19    0.69
  15   3  -3   19.72    1.52
 -15   3   3   25.69    0.65
 -15   3   3   25.13    0.68
  13  -3  -3    7.33    0.45
 -13  -3   3    5.76    0.97
  13  -3  -3    6.90    0.22
 -13  -3   3    6.58    0.27
  13  -3  -3    6.38    0.26
  13  -3  -3    6.81    0.75
 -13  -3   3    4.87    1.32
 -13  -3   3    6.92    0.23
 -13   3   3    7.12    0.23
  13   3  -3    6.72    1.00
 -13   3   3    7.55    0.26
  13   3  -3    7.38    0.22
 -13   3   3    7.07    0.20
 -13   3   3    6.98    0.27
 -13   3   3    7.21    0.25
  13   3  -3    7.05    0.25
  13   3  -3    6.87    0.27
 -13   3   3    7.22    0.40
 -13   3   3    6.88    0.65
  13   3  -3    8.10    1.54
 -11  -3   3   28.22    2.13
 -11  -3   3   30.33    0.75
 -11  -3   3   29.07    0.80
  11  -3  -3   28.99    0.76
  11  -3  -3   29.83    1.28
 -11  -3   3   27.50    1.44
 -11  -3   3   32.21    0.77
 -11  -3   3   28.80    0.78
  11  -3  -3   29.60    0.82
  11  -3  -3   29.63    1.01
 -11   3   3   28.43    0.79
 -11   3   3   29.74    0.80
  11   3  -3   27.35    0.79
 -11   3   3   29.61    0.78
  11   3  -3   29.51    0.80
  11   3  -3   29.88    0.75
  11   3  -3   29.48    0.76
 -11   3   3   29.18    0.78
 -11   3   3   29.58    0.99
  11   3  -3   28.05    0.78
 -11   3   3   28.35    1.23
 -11   3   3   29.08    0.77
 -11   3   3   29.19    0.75
  11   3  -3   29.46    2.15
  11   3  -3   28.96    1.46
   9  -3  -3   75.19    1.96
  -9  -3   3   75.12    1.93
  -9  -3   3   77.92    1.92
  -9  -3   3   74.70    1.94
   9  -3  -3   83.59    2.53
  -9  -3   3   73.45    1.96
   9  -3  -3   79.63    2.22
   9  -3  -3   75.17    1.93
   9   3  -3   81.53    2.63
   9   3  -3   77.08    3.19
  -9   3   3   75.74    1.97
  -9   3   3   75.63    1.95
  -9   3   3   75.13    2.47
  -9   3   3   74.54    1.95
   9   3  -3   77.82    1.93
   9   3  -3   67.65    1.97
   9   3  -3   76.31    1.94
  -9   3   3   74.67    1.94
  -9   3   3   75.73    1.91
   9   3  -3   68.35    1.97
  -9   3   3   75.46    1.94
  -9   3   3   77.73    1.91
  -9   3   3   75.86    1.93
   9   3  -3   80.31    1.94
  -9   3   3   75.23    2.20
  -7  -3   3   18.20    1.64
   7  -3  -3   19.71    0.54
  -7  -3   3   20.90    0.51
  -7  -3   3   19.85    0.53
   7  -3  -3   20.35    0.52
  -7  -3   3   19.64    1.11
  -7  -3   3   19.89    0.54
   7  -3  -3   19.98    1.15
  -7  -3   3   20.47    0.52
   7  -3  -3   20.41    0.84
  -7   3   3   19.15    0.53
  -7   3   3   19.85    0.53
  -7   3   3   19.23    0.84
   7   3  -3   19.63    1.06
   7   3  -3   18.81    0.54
   7   3  -3   19.38    0.52
   7   3  -3   19.29    0.53
  -7   3   3   19.01    0.54
  -7   3   3   19.75    0.50
  -7   3   3   19.62    0.53
  -7   3   3   18.84    0.53
  -7   3   3   17.95    1.19
  -7   3   3   20.02    0.50
   7   3  -3   18.46    1.50
   5  -3  -3    6.69    0.85
  -5  -3   3    6.39    0.72
  -5  -3   3    5.98    1.01
  -5  -3   3    6.56    0.20
   5  -3  -3    6.35    0.19
   5  -3  -3    5.99    0.21
   5  -3  -3    5.90    0.50
  -5  -3   3    6.37    0.21
  -5   3   3    7.36    0.92
  -5   3   3    6.68    0.17
   5   3  -3    6.59    0.18
  -5   3   3    6.56    0.18
   5   3  -3    6.38    0.66
   5   3  -3    6.46    0.21
  -5   3   3    6.39    0.20
   5   3  -3    6.60    0.19
  -5   3   3    6.11    0.20
   5   3  -3    4.30    0.85
   5   3  -3    6.89    0.21
  -5   3   3    5.63    0.53
  -5   3   3    6.21    0.21
  -5   3   3    6.48    0.20
  -5   3   3    6.59    0.20
   5   3  -3    6.55    0.20
   3  -3  -3  129.57    3.32
  -3  -3   3  124.81    3.32
  -3  -3   3  131.69    3.32
   3  -3  -3  129.91    4.13
   3  -3  -3  130.84    3.74
  -3  -3   3  129.92    3.89
  -3  -3   3  129.69    4.43
   3  -3  -3  137.47    3.31
   3  -3  -3  131.59    3.31
  -3  -3   3  128.72    3.32
  -3   3   3  129.24    3.32
  -3   3   3  137.24    3.77
   3   3  -3  132.10    3.32
   3   3  -3  130.51    3.87
   3   3  -3  129.33    4.35
  -3   3   3  138.88    3.31
   3   3  -3  130.23    3.32
   3   3  -3  129.09    3.31
  -3   3   3  134.60    4.17
  -3   3   3  128.32    3.31
   3   3  -3  130.09    3.32
  -3   3   3  128.01    3.33
   1  -3  -3  106.98    2.59
  -1  -3   3  104.91    3.19
   1  -3  -3   99.69    2.60
   1  -3  -3  100.19    2.61
  -1  -3   3  101.67    2.59
  -1  -3   3  101.13    3.71
  -1  -3   3   97.89    2.61
   1  -3  -3  109.48    3.61
   1  -3  -3   99.66    2.60
   1  -3  -3  112.23    3.15
  -1  -3   3  100.14    2.61
  -1  -3   3   99.13    2.61
  -1   3   3  102.18    2.61
  -1   3   3  105.09    3.53
   1   3  -3  103.06    3.68
   1   3  -3   98.98    2.61
   1   3  -3  101.53    2.61
   1   3  -3  102.21    2.61
  -1   3   3   98.98    2.61
  -1   3   3  109.21    3.13
  -1   3   3  101.88    2.60
   1   3  -3  101.25    2.60
   1   3  -3  109.62    3.21
  -1   3   3   98.84    2.61
   1  -3   3   64.38    2.17
   1  -3   3   61.76    1.57
   1  -3   3   65.59    2.76
  -1  -3  -3   60.68    1.57
   1  -3   3   57.80    1.57
  -1  -3  -3   60.73    1.56
  -1  -3  -3   62.36    1.55
   1  -3   3   61.57    1.54
   1  -3   3   62.46    1.57
  -1  -3  -3   60.38    1.56
  -1  -3  -3   60.82    1.55
   1  -3   3   58.33    1.56
   1   3   3   60.70    1.57
  -1   3  -3   66.89    2.64
  -1   3  -3   61.22    1.57
   1   3   3   60.63    1.56
   1   3   3   59.99    1.57
  -1   3  -3   61.34    1.56
   1   3   3   61.33    1.55
  -1   3  -3   60.28    1.57
  -1   3  -3   62.89    2.13
   1   3   3   57.21    2.55
   1   3   3   58.66    2.11
   1   3   3   60.41    1.58
  -3  -3  -3   31.94    0.85
   3  -3   3   32.58    0.85
   3  -3   3   33.62    0.84
   3  -3   3   31.26    1.95
   3  -3   3   30.12    1.40
  -3  -3  -3   32.33    0.84
  -3  -3  -3   31.63    0.85
   3  -3   3   32.90    0.83
   3  -3   3   31.94    0.85
  -3  -3  -3   31.86    0.83
  -3   3  -3   30.88    0.85
   3   3   3   32.09    2.09
   3   3   3   31.27    1.44
   3   3   3   35.04    1.52
   3   3   3   31.75    0.83
  -3   3  -3   31.42    0.85
  -3   3  -3   31.60    1.82
   3   3   3   29.93    1.94
   3   3   3   32.30    0.85
   3   3   3   31.46    0.84
   3   3   3   32.49    0.84
  -3   3  -3   32.84    0.84
  -3   3  -3   31.94    1.38
   5  -3   3    7.62    0.85
  -5  -3  -3    7.64    0.36
   5  -3   3    8.54    0.28
  -5  -3  -3    8.58    0.28
   5  -3   3    8.40    0.27
  -5  -3  -3    8.83    0.24
   5  -3   3    8.60    0.25
  -5  -3  -3    8.48    0.27
   5  -3   3    8.57    1.47
  -5   3  -3    9.28    0.29
  -5   3  -3    8.40    0.71
  -5   3  -3    7.82    1.17
  -5   3  -3    8.95    0.25
   5   3   3    9.40    0.25
   5   3   3    9.51    0.25
  -5   3  -3    8.92    0.27
   5   3   3    8.39    0.86
  -5   3  -3    8.08    0.30
   5   3   3    8.60    1.33
   5   3   3    8.95    0.26
   5   3   3    9.23    0.27
   5   3   3    6.61    1.29
   5   3   3    8.69    0.97
  -7  -3  -3   15.50    0.46
   7  -3   3   12.27    1.07
  -7  -3  -3   16.12    0.40
   7  -3   3   16.03    0.45
  -7  -3  -3   15.29    0.46
   7  -3   3   15.49    0.42
   7  -3   3   11.92    1.69
   7   3   3   13.84    1.27
  -7   3  -3   14.94    0.46
  -7   3  -3   15.96    1.58
   7   3   3   15.43    0.44
  -7   3  -3   15.91    0.46
  -7   3  -3   15.91    0.46
  -7   3  -3   15.86    0.42
  -7   3  -3   15.17    1.02
   7   3   3   16.39    0.41
   7   3   3   16.39    0.41
   7   3   3   16.08    0.45
  -7   3  -3   15.50    0.45
   7   3   3   14.68    0.45
   7   3   3   17.86    2.28
   9  -3   3   56.55    2.27
  -9  -3  -3   59.81    1.54
  -9  -3  -3   58.80    1.54
   9  -3   3   54.51    2.97
  -9  -3  -3   57.46    1.54
   9  -3   3   58.33    1.49
   9  -3   3   61.84    1.53
  -9   3  -3   57.86    1.54
   9   3   3   58.82    1.53
   9   3   3   59.75    1.54
   9   3   3   59.80    2.49
  -9   3  -3   55.92    2.95
   9   3   3   58.73    3.46
   9   3   3   54.23    3.69
  -9   3  -3   56.54    1.47
  -9   3  -3   60.50    1.54
  -9   3  -3   59.50    1.54
  -9   3  -3   58.47    1.51
  -9   3  -3   58.84    1.55
  -9   3  -3   58.83    2.27
   9   3   3   55.03    2.54
   9   3   3   63.15    1.48
   9   3   3   59.43    1.48
   9   3   3   59.16    1.53
  11  -3   3   53.42    1.39
 -11  -3  -3   53.41    1.41
 -11  -3  -3   52.37    1.42
  11  -3   3   44.78    3.14
 -11  -3  -3   53.56    1.41
  11  -3   3   46.36    2.23
  11  -3   3   53.11    1.39
 -11   3  -3   54.67    1.41
  11   3   3   55.96    2.54
 -11   3  -3   53.90    1.38
  11   3   3   53.11    3.72
 -11   3  -3   52.61    1.41
 -11   3  -3   53.97    1.35
 -11   3  -3   54.88    2.27
  11   3   3   53.72    1.41
 -11   3  -3   52.25    1.42
  11   3   3   53.30    1.41
 -11   3  -3   57.29    3.27
  11   3   3   56.31    4.11
  11   3   3   52.34    2.63
 -13  -3  -3    4.93    0.26
 -13  -3  -3    4.59    0.26
  13  -3   3    4.88    0.22
 -13  -3  -3    4.72    0.26
 -13   3  -3    5.18    0.26
 -13   3  -3    5.25    0.20
  13   3   3    5.14    0.24
 -13   3  -3    5.11    0.27
 -13   3  -3    5.27    0.25
  13   3   3    4.80    0.25
 -15  -3  -3   11.95    0.45
 -15  -3  -3   12.45    0.44
  15  -3   3   12.60    0.41
 -15  -3  -3   12.15    0.45
  15   3   3   13.06    0.45
 -15   3  -3   12.87    0.40
 -15   3  -3   12.75    0.46
 -15   3  -3   12.86    0.44
  15   3   3   12.70    0.43
 -15   3  -3   13.11    0.46
 -17  -3  -3   28.42    0.87
 -17  -3  -3   27.90    0.88
 -17  -3  -3   27.75    0.86
 -17  -3  -3   29.00    0.85
 -17   3  -3   31.68    0.96
 -17   3  -3   28.79    0.87
 -17   3  -3   29.06    0.87
  17   3   3   28.34    0.86
 -17   3  -3   29.23    0.86
  17   3   3   29.41    0.84
 -19  -3  -3   12.41    0.50
 -19  -3  -3   12.74    0.48
 -19  -3  -3   12.90    0.50
 -19  -3  -3   13.08    0.52
 -19   3  -3   12.91    0.51
 -19   3  -3   13.51    0.50
 -19   3  -3   13.07    0.50
  19   3   3   13.78    0.51
 -19   3  -3   12.89    0.53
 -21  -3  -3    5.39    0.38
 -21  -3  -3    5.62    0.41
 -21  -3  -3    5.57    0.38
 -21  -3  -3    4.81    0.36
 -21   3  -3    4.80    0.38
 -21   3  -3    4.90    0.40
 -21   3  -3    5.22    0.40
 -21   3  -3    5.67    0.38
  21   3   3    5.90    0.38
 -24  -4   3    0.41    0.20
 -24  -4   3    0.78    0.19
 -24   4   3    0.45    0.18
  24   4  -3    0.56    0.19
 -24   4   3    0.25    0.16
 -24   4   3    0.70    0.20
 -22  -4   3    6.56    0.38
 -22  -4   3    6.82    0.40
  22   4  -3    6.39    0.39
 -22   4   3    7.05    0.38
 -22   4   3    7.11    0.34
 -22   4   3    7.28    0.38
  20  -4  -3   28.57    0.84
 -20  -4   3   28.90    0.86
 -20  -4   3   27.38    0.86
 -20   4   3   28.53    0.85
 -20   4   3   28.96    0.83
 -20   4   3   29.61    0.82
 -20   4   3   28.65    0.82
 -20   4   3   27.51    0.86
  20   4  -3   29.55    0.87
 -18  -4   3    5.10    0.29
 -18  -4   3    4.97    0.29
  18  -4  -3    4.97    0.28
 -18  -4   3    5.00    0.21
 -18   4   3    4.62    0.28
  18   4  -3    5.28    0.29
 -18   4   3    5.17    0.28
 -18   4   3    5.04    0.25
 -18   4   3    4.79    0.23
 -18   4   3    4.91    0.26
  16  -4  -3   13.43    0.48
 -16  -4   3   10.99    0.42
 -16  -4   3   11.32    0.37
 -16  -4   3   11.62    0.41
  16  -4  -3   14.56    0.86
  16  -4  -3   11.31    0.40
 -16   4   3   11.78    0.41
  16   4  -3   12.11    0.42
 -16   4   3   11.93    0.37
  16   4  -3   12.18    0.43
  16   4  -3   12.07    0.36
 -16   4   3   11.79    0.39
 -16   4   3   12.10    0.40
 -16   4   3   11.50    0.42
 -14  -4   3   43.91    1.15
  14  -4  -3   43.06    1.17
  14  -4  -3   46.39    2.01
 -14  -4   3   39.00    2.16
 -14  -4   3   43.14    1.18
 -14  -4   3   43.07    1.18
  14  -4  -3   45.43    1.49
 -14  -4   3   37.91    3.33
 -14  -4   3   44.81    1.13
 -14   4   3   43.81    1.16
  14   4  -3   43.73    1.18
 -14   4   3   44.29    1.14
 -14   4   3   43.78    1.16
 -14   4   3   44.37    1.83
  14   4  -3   43.59    1.16
 -14   4   3   43.32    1.17
  14   4  -3   44.01    3.46
  14   4  -3   43.79    1.13
  14   4  -3   39.51    2.14
 -14   4   3   43.15    1.18
 -14   4   3   44.07    1.43
 -12  -4   3   11.10    0.37
  12  -4  -3   11.20    0.37
 -12  -4   3   11.33    0.32
  12  -4  -3   11.19    0.31
  12  -4  -3    9.40    1.41
 -12  -4   3   10.55    1.90
  12  -4  -3    8.95    0.97
 -12  -4   3   11.13    0.34
 -12  -4   3   10.47    1.30
 -12   4   3   10.83    0.35
 -12   4   3   10.88    0.35
 -12   4   3   11.02    0.38
  12   4  -3   11.00    0.37
 -12   4   3   10.76    1.18
  12   4  -3   11.28    0.35
  12   4  -3    9.85    1.25
 -12   4   3   11.09    0.36
  12   4  -3   11.05    0.32
  12   4  -3    8.84    1.80
 -12   4   3   11.34    0.31
 -12   4   3   11.56    0.36
  12   4  -3   10.92    0.37
 -12   4   3   10.78    0.74
  10  -4  -3   66.60    1.73
 -10  -4   3   68.60    2.65
 -10  -4   3   69.64    1.78
  10  -4  -3   69.40    2.19
 -10  -4   3   69.15    1.73
 -10  -4   3   68.09    1.74
 -10  -4   3   70.83    3.55
  10  -4  -3   69.54    2.66
  10  -4  -3   69.65    1.78
 -10  -4   3   68.75    1.76
 -10  -4   3   69.84    1.75
  10   4  -3   68.19    1.78
  10   4  -3   67.83    1.75
 -10   4   3   66.81    1.73
 -10   4   3   65.24    1.78
 -10   4   3   66.11    2.61
 -10   4   3   67.32    1.76
  10   4  -3   67.74    1.76
  10   4  -3   69.49    2.62
 -10   4   3   68.76    1.77
 -10   4   3   68.55    1.77
  10   4  -3   64.96    3.47
  10   4  -3   66.08    1.77
 -10   4   3   68.43    2.17
 -10   4   3   67.98    1.76
   8  -4  -3   78.65    2.09
  -8  -4   3   82.12    2.12
  -8  -4   3   79.42    4.28
   8  -4  -3   82.29    2.58
  -8  -4   3   82.76    2.09
  -8  -4   3   83.41    2.10
   8  -4  -3   78.60    3.03
  -8  -4   3   77.68    3.18
  -8  -4   3   81.82    2.12
  -8  -4   3   84.11    2.12
   8  -4  -3   81.42    2.13
  -8   4   3   78.30    2.12
   8   4  -3   90.50    3.73
  -8   4   3   82.99    2.08
   8   4  -3   82.51    2.10
  -8   4   3   82.16    3.07
  -8   4   3   86.91    2.60
   8   4  -3   79.10    2.12
   8   4  -3   81.21    2.13
  -8   4   3   86.22    2.12
  -8   4   3   82.09    2.13
  -8   4   3   82.85    2.12
   8   4  -3   90.32    2.97
   8   4  -3   81.96    2.13
   6  -4  -3   22.51    1.60
  -6  -4   3   22.16    0.60
   6  -4  -3   22.23    0.58
  -6  -4   3   22.11    2.12
  -6  -4   3   22.49    1.37
   6  -4  -3   21.57    1.08
  -6  -4   3   23.40    0.61
  -6  -4   3   23.45    0.60
   6  -4  -3   19.61    0.63
   6   4  -3   22.30    0.59
   6   4  -3   21.90    1.25
   6   4  -3   22.17    0.58
   6   4  -3   22.53    0.60
  -6   4   3   22.54    0.60
  -6   4   3   23.51    1.11
  -6   4   3   21.40    0.60
  -6   4   3   20.52    0.64
   6   4  -3   20.36    1.83
   6   4  -3   20.75    0.63
  -6   4   3   24.90    1.65
  -6   4   3   22.10    0.61
  -4  -4   3  147.47    3.81
   4  -4  -3  159.40    4.91
  -4  -4   3  147.96    3.81
  -4  -4   3  146.43    3.80
  -4  -4   3  148.59    4.58
   4  -4  -3  153.00    3.82
  -4  -4   3  145.35    5.28
   4  -4  -3  166.79    4.41
   4  -4  -3  148.05    3.80
  -4  -4   3  150.34    3.82
   4   4  -3  154.80    4.57
   4   4  -3  151.79    3.80
   4   4  -3  147.31    3.82
  -4   4   3  145.91    3.82
  -4   4   3  148.54    3.79
  -4   4   3  148.32    3.81
  -4   4   3  153.07    4.93
   4   4  -3  154.42    5.23
  -4   4   3  149.77    3.81
  -4   4   3  147.37    3.80
   4   4  -3  146.56    3.81
  -4   4   3  148.84    4.37
   4   4  -3  147.05    3.82
   2  -4  -3   59.30    1.55
   2  -4  -3   59.69    2.16
  -2  -4   3   64.21    3.03
  -2  -4   3   61.33    1.57
  -2  -4   3   64.80    2.32
   2  -4  -3   58.70    2.73
  -2  -4   3   62.60    1.58
   2  -4  -3   62.05    1.57
   2  -4  -3   58.66    1.56
  -2  -4   3   60.48    1.57
   2   4  -3   59.53    1.57
   2   4  -3   60.86    1.56
   2   4  -3   59.86    1.55
  -2   4   3   58.75    1.56
   2   4  -3   61.34    1.57
  -2   4   3   60.04    1.56
  -2   4   3   61.34    1.56
  -2   4   3   60.43    1.57
   2   4  -3   60.64    1.57
   2   4  -3   58.11    2.22
  -2   4   3   62.10    2.16
  -2   4   3   60.52    2.66
   2   4  -3   60.81    2.85
  -2   4   3   60.66    1.55
   0  -4  -3   40.72    1.05
   0  -4  -3   36.94    2.41
   0  -4  -3   41.20    1.08
   0  -4   3   41.59    1.08
   0  -4   3   38.83    2.50
   0  -4   3   42.19    1.09
   0  -4  -3   40.28    1.07
   0  -4   3   42.90    1.08
   0  -4  -3   39.96    1.75
   0  -4  -3   41.13    1.07
   0  -4   3   37.81    1.77
   0  -4   3   42.32    1.05
   0   4  -3   41.79    1.07
   0   4   3   41.68    1.07
   0   4   3   40.77    1.70
   0   4  -3   40.27    1.73
   0   4  -3   40.98    2.34
   0   4   3   41.73    1.08
   0   4   3   41.42    1.08
   0   4  -3   42.32    1.08
   0   4   3   40.68    2.24
   0   4  -3   41.68    1.08
   0   4   3   39.86    1.08
   0   4   3   42.62    1.06
   0   4  -3   41.63    1.08
   2  -4   3   59.08    1.61
  -2  -4  -3   62.23    1.59
  -2  -4  -3   62.92    2.38
   2  -4   3   61.52    2.34
  -2  -4  -3   62.55    1.58
   2  -4   3   64.22    1.56
   2  -4   3   62.55    1.60
   2  -4   3   58.68    1.64
  -2  -4  -3   59.29    3.14
  -2  -4  -3   62.74    1.60
  -2  -4  -3   63.25    1.59
   2  -4   3   62.87    3.10
   2   4   3   60.33    2.33
  -2   4  -3   61.36    1.61
   2   4   3   58.96    2.99
   2   4   3   61.98    1.59
  -2   4  -3   63.31    2.30
   2   4   3   62.50    1.58
   2   4   3   63.32    1.61
  -2   4  -3   64.58    2.92
  -2   4  -3   63.27    1.59
   2   4   3   60.26    1.62
  -2   4  -3   59.40    1.62
   4  -4   3   81.04    3.68
  -4  -4  -3   83.02    2.14
   4  -4   3   87.36    2.13
   4  -4   3   84.89    2.16
   4  -4   3   83.93    2.15
  -4  -4  -3   86.46    2.16
  -4  -4  -3   83.19    2.14
   4  -4   3   83.90    2.17
   4  -4   3   81.02    2.92
  -4   4  -3   81.86    2.16
  -4   4  -3   80.35    3.46
   4   4   3   88.22    3.02
   4   4   3   84.91    3.71
  -4   4  -3   84.24    2.16
   4   4   3   80.44    3.91
   4   4   3   83.10    2.14
   4   4   3   83.13    2.16
  -4   4  -3   85.11    2.15
   4   4   3   82.73    2.15
   4   4   3   84.38    2.16
   4   4   3   89.71    3.11
  -4   4  -3   80.65    2.85
   6  -4   3    9.63    0.32
  -6  -4  -3    9.51    0.27
  -6  -4  -3    9.29    0.31
   6  -4   3    9.75    0.28
   6  -4   3    9.46    0.31
  -6  -4  -3   10.00    0.29
  -6  -4  -3    9.61    0.32
   6   4   3    9.47    0.27
   6   4   3    8.71    0.30
   6   4   3    9.34    0.31
  -6   4  -3    8.06    0.81
   6   4   3   10.43    1.60
   6   4   3    7.92    1.72
  -6   4  -3    7.42    1.25
   6   4   3    8.45    1.24
  -6   4  -3    9.35    0.32
   6   4   3    9.38    0.29
   6   4   3    8.79    0.31
   6   4   3    9.31    1.11
  -6   4  -3    9.53    0.29
   8  -4   3   22.93    1.48
   8  -4   3   24.10    0.68
   8  -4   3   25.07    2.36
   8  -4   3   23.82    0.64
  -8  -4  -3   23.84    0.68
  -8  -4  -3   23.94    0.67
  -8  -4  -3   24.35    0.68
  -8  -4  -3   25.08    0.62
   8  -4   3   24.16    0.68
   8   4   3   24.33    0.62
   8   4   3   24.18    0.67
   8   4   3   22.82    0.68
  -8   4  -3   25.75    2.22
   8   4   3   23.79    0.67
   8   4   3   23.28    2.79
   8   4   3   19.50    1.76
  -8   4  -3   24.53    0.67
   8   4   3   25.51    1.74
  -8   4  -3   24.25    0.69
  -8   4  -3   24.25    1.44
   8   4   3   21.56    3.14
  -8   4  -3   24.10    0.68
  -8   4  -3   23.95    0.69
  10  -4   3   47.31    1.25
  10  -4   3   47.46    1.24
 -10  -4  -3   46.85    1.26
  10  -4   3   34.31    3.72
 -10  -4  -3   47.76    1.25
 -10  -4  -3   46.99    1.26
  10  -4   3   48.20    1.20
  10   4   3   43.36    2.59
  10   4   3   46.11    3.78
 -10   4  -3   47.54    2.18
 -10   4  -3   46.04    1.26
 -10   4  -3   47.01    1.20
 -10   4  -3   46.94    1.24
  10   4   3   43.83    4.28
  10   4   3   47.18    1.25
  10   4   3   45.05    1.26
  10   4   3   45.89    1.24
 -10   4  -3   45.41    1.26
  10   4   3   51.60    2.57
 -10   4  -3   45.86    1.26
 -10   4  -3   52.55    3.30
  12  -4   3   21.56    0.63
 -12  -4  -3   22.00    0.65
 -12  -4  -3   21.75    0.65
 -12  -4  -3   22.01    0.65
  12   4   3   21.67    0.64
  12   4   3   21.25    3.35
  12   4   3   21.58    0.63
 -12   4  -3   20.94    0.65
 -12   4  -3   21.02    0.65
 -12   4  -3   21.79    0.58
 -12   4  -3   21.51    0.63
  12   4   3   21.80    1.97
 -12   4  -3   21.45    0.65
 -14  -4  -3    7.43    0.34
 -14  -4  -3    7.33    0.33
 -14  -4  -3    7.82    0.34
  14  -4   3    7.70    0.32
  14   4   3    7.51    0.32
 -14   4  -3    7.46    0.35
 -14   4  -3    7.29    0.31
 -14   4  -3    7.08    0.33
 -14   4  -3    7.16    0.34
  14   4   3    6.94    0.31
 -16  -4  -3   31.00    0.92
 -16  -4  -3   31.90    0.92
 -16  -4  -3   30.45    0.92
 -16   4  -3   30.55    0.92
 -16   4  -3   30.28    0.93
  16   4   3   31.92    0.90
 -16   4  -3   31.62    0.90
 -16   4  -3   32.19    0.93
 -18  -4  -3    6.81    0.40
 -18  -4  -3    7.24    0.38
 -18  -4  -3    7.36    0.39
 -18  -4  -3    6.82    0.37
 -18   4  -3    6.81    0.40
  18   4   3    7.75    0.38
  18   4   3    7.75    0.36
 -18   4  -3    7.23    0.36
 -18   4  -3    6.92    0.37
 -18   4  -3    7.44    0.41
 -20  -4  -3    1.08    0.20
 -20  -4  -3    1.20    0.21
 -20  -4  -3    1.53    0.24
 -20  -4  -3    1.15    0.20
 -20   4  -3    0.69    0.21
 -20   4  -3    1.18    0.20
 -20   4  -3    1.41    0.23
 -20   4  -3    1.10    0.20
  20   4   3    1.12    0.20
 -23  -5   3    8.78    0.45
 -23  -5   3    8.95    0.47
 -23   5   3    8.71    0.46
  23   5  -3    8.62    0.47
 -23   5   3    9.41    0.48
 -23   5   3    8.86    0.45
 -23   5   3    8.97    0.40
 -21  -5   3    6.97    0.40
 -21  -5   3    6.71    0.39
  21  -5  -3    6.89    0.38
 -21   5   3    7.56    0.35
 -21   5   3    6.94    0.39
 -21   5   3    7.40    0.33
 -21   5   3    7.00    0.39
 -21   5   3    7.36    0.40
  21   5  -3    7.25    0.40
  19  -5  -3    0.84    0.17
 -19  -5   3    0.61    0.15
 -19  -5   3    0.77    0.16
 -19   5   3    0.88    0.16
 -19   5   3    0.79    0.17
 -19   5   3    1.02    0.15
  19   5  -3    1.19    0.17
 -19   5   3    0.85    0.13
 -19   5   3    0.76    0.16
  17  -5  -3    6.74    0.33
 -17  -5   3    7.12    0.34
 -17  -5   3    7.06    0.28
 -17  -5   3    7.44    0.34
  17   5  -3    6.92    0.34
 -17   5   3    6.79    0.34
  17   5  -3    6.67    0.32
 -17   5   3    6.67    0.32
 -17   5   3    6.43    0.33
 -17   5   3    6.92    0.29
 -17   5   3    6.85    0.29
  15  -5  -3   19.11    0.61
 -15  -5   3   19.90    0.57
 -15  -5   3   19.04    0.61
  15  -5  -3   19.33    1.23
  15  -5  -3   21.60    2.23
 -15  -5   3   18.79    0.60
 -15   5   3   19.47    0.58
 -15   5   3   19.48    1.06
 -15   5   3   19.91    0.58
  15   5  -3   18.93    0.59
 -15   5   3   19.97    1.78
 -15   5   3   18.81    0.62
  15   5  -3   19.74    0.55
 -15   5   3   20.04    0.54
 -15   5   3   19.16    0.60
  15   5  -3   19.97    0.61
 -15   5   3   19.20    0.60
  13  -5  -3    9.09    1.01
 -13  -5   3    7.41    2.35
  13  -5  -3    8.93    0.35
  13  -5  -3    9.17    1.44
 -13  -5   3    9.16    0.28
 -13  -5   3    9.15    0.34
 -13  -5   3    8.79    0.31
 -13  -5   3    9.00    0.34
 -13  -5   3    8.83    1.66
  13   5  -3    8.94    0.35
  13   5  -3    9.09    0.34
 -13   5   3    9.03    0.32
  13   5  -3    9.13    0.29
 -13   5   3    8.58    0.86
  13   5  -3   10.55    2.30
 -13   5   3    8.96    0.33
 -13   5   3    8.90    0.32
 -13   5   3    9.17    0.26
 -13   5   3    8.99    0.36
  13   5  -3    8.88    0.33
 -13   5   3    8.93    0.34
 -13   5   3    8.08    1.23
  13   5  -3   10.16    1.53
 -11  -5   3    5.79    0.24
 -11  -5   3    5.81    1.11
  11  -5  -3    5.74    0.18
  11  -5  -3    5.67    1.27
  11  -5  -3    5.71    0.88
 -11  -5   3    3.84    1.94
 -11  -5   3    5.71    0.26
 -11  -5   3    5.72    0.24
  11  -5  -3    5.60    0.26
 -11   5   3    6.26    0.17
 -11   5   3    5.40    0.27
  11   5  -3    6.20    0.22
 -11   5   3    5.96    0.24
 -11   5   3    6.05    0.26
  11   5  -3    6.23    0.27
 -11   5   3    5.90    0.25
  11   5  -3    7.14    1.34
  11   5  -3    8.64    2.11
  11   5  -3    6.37    0.25
 -11   5   3    6.03    0.24
 -11   5   3    5.25    1.18
 -11   5   3    6.61    0.83
  11   5  -3    5.86    0.26
  -9  -5   3   18.42    1.63
  -9  -5   3   19.91    0.53
   9  -5  -3   20.01    0.51
   9  -5  -3   18.97    1.19
   9  -5  -3   18.42    0.57
   9  -5  -3   16.81    1.93
  -9  -5   3   18.67    2.84
  -9  -5   3   20.00    0.56
  -9  -5   3   19.29    0.55
  -9  -5   3   19.54    0.56
   9   5  -3   18.17    0.56
   9   5  -3   22.48    1.63
  -9   5   3   20.30    1.99
  -9   5   3   18.71    0.55
   9   5  -3   18.61    0.55
  -9   5   3   18.63    0.55
   9   5  -3   19.16    0.57
  -9   5   3   18.88    0.55
  -9   5   3   19.34    0.56
   9   5  -3   18.65    0.56
   9   5  -3   22.46    2.78
  -9   5   3   20.82    1.22
  -9   5   3   18.36    0.58
  -7  -5   3   49.76    3.34
  -7  -5   3   53.70    1.41
  -7  -5   3   55.31    1.40
   7  -5  -3   54.31    1.38
   7  -5  -3   54.82    2.78
  -7  -5   3   55.33    2.45
   7  -5  -3   55.27    1.43
  -7  -5   3   54.70    1.41
  -7  -5   3   54.38    1.41
   7  -5  -3   52.01    2.05
  -7   5   3   54.10    1.43
  -7   5   3   53.74    1.41
  -7   5   3   52.31    1.41
   7   5  -3   53.56    1.42
  -7   5   3   51.24    2.06
  -7   5   3   52.21    2.76
   7   5  -3   59.18    3.33
   7   5  -3   52.79    1.41
  -7   5   3   51.62    1.41
   7   5  -3   53.27    1.42
   7   5  -3   56.91    2.38
  -5  -5   3   14.07    1.37
   5  -5  -3   12.86    1.03
  -5  -5   3   13.90    0.40
  -5  -5   3   13.56    0.38
   5  -5  -3   12.61    1.69
  -5  -5   3   11.73    1.92
   5  -5  -3   13.18    0.41
   5  -5  -3   13.35    0.37
  -5  -5   3   13.98    0.40
   5   5  -3   12.84    0.41
   5   5  -3   13.52    0.45
   5   5  -3   12.86    0.36
  -5   5   3   11.72    1.00
  -5   5   3   12.90    0.39
   5   5  -3   12.30    1.15
   5   5  -3   12.73    2.03
  -5   5   3   12.33    0.39
   5   5  -3   12.55    0.40
   5   5  -3   12.95    0.40
  -5   5   3   10.11    1.67
  -5   5   3   12.60    0.41
  -5   5   3   13.12    0.37
   3  -5  -3   30.66    0.88
   3  -5  -3   32.48    0.84
  -3  -5   3   32.68    0.88
  -3  -5   3   33.25    1.83
  -3  -5   3   32.94    0.87
  -3  -5   3   34.75    2.82
  -3  -5   3   32.77    0.86
   3  -5  -3   29.80    2.31
   3  -5  -3   30.02    1.60
   3  -5  -3   32.59    0.86
  -3  -5   3   33.43    0.89
   3   5  -3   32.45    0.88
  -3   5   3   34.49    0.86
   3   5  -3   33.39    1.69
   3   5  -3   32.65    0.89
  -3   5   3   32.72    0.87
  -3   5   3   35.31    2.20
   3   5  -3   31.92    0.88
   3   5  -3   33.35    0.87
  -3   5   3   31.54    0.89
  -3   5   3   32.38    0.88
   3   5  -3   32.14    2.47
   3   5  -3   32.23    0.86
  -3   5   3   33.01    0.88
  -3   5   3   33.58    1.55
  -1  -5   3   38.04    2.88
  -1  -5   3   39.29    1.02
   1  -5  -3   39.40    0.99
   1  -5  -3   39.26    2.75
  -1  -5   3   38.83    1.04
   1  -5  -3   39.82    1.05
   1  -5  -3   36.16    1.84
  -1  -5   3   40.13    1.06
   1  -5  -3   40.01    0.99
   1  -5  -3   40.19    1.02
   1  -5  -3   39.16    1.03
  -1  -5   3   40.34    1.04
  -1  -5   3   37.59    1.97
  -1   5   3   39.24    1.05
   1   5  -3   38.20    1.04
  -1   5   3   39.65    1.80
  -1   5   3   40.09    1.03
  -1   5   3   38.97    1.04
   1   5  -3   39.19    1.05
  -1   5   3   36.09    2.42
   1   5  -3   39.87    1.05
   1   5  -3   39.02    1.03
   1   5  -3   37.46    2.62
   1   5  -3   37.66    1.86
  -1   5   3   39.62    1.04
  -1   5   3   39.49    1.02
   1   5  -3   38.92    1.04
  -1  -5  -3   45.33    1.18
  -1  -5  -3   45.68    1.15
  -1  -5  -3   45.71    1.17
  -1  -5  -3   46.26    3.20
  -1  -5  -3   46.22    2.13
   1  -5   3   44.25    1.14
   1  -5   3   43.71    1.20
   1  -5   3   45.27    3.06
   1  -5   3   46.73    2.13
   1  -5   3   45.60    1.14
   1  -5   3   44.76    1.19
   1  -5   3   45.45    1.19
   1   5   3   44.96    1.18
   1   5   3   46.99    2.05
  -1   5  -3   41.17    1.95
  -1   5  -3   44.76    1.19
   1   5   3   45.35    1.19
   1   5   3   45.86    1.17
  -1   5  -3   45.18    1.18
  -1   5  -3   45.01    1.18
   1   5   3   43.15    1.19
   1   5   3   43.91    1.19
   1   5   3   42.76    2.78
  -1   5  -3   44.72    1.17
  -1   5  -3   42.51    2.73
  -1   5  -3   44.20    1.19
  -1   5  -3   45.39    1.19
   3  -5   3  126.55    4.15
  -3  -5  -3  122.98    3.16
  -3  -5  -3  126.86    3.15
  -3  -5  -3  121.77    3.15
   3  -5   3  128.76    5.21
   3  -5   3  123.81    3.18
   3  -5   3  122.11    3.16
  -3  -5  -3  122.84    3.13
  -3  -5  -3  122.64    4.19
   3  -5   3  125.96    3.16
  -3  -5  -3  123.59    5.31
   3   5   3  119.15    3.16
  -3   5  -3  120.18    3.16
   3   5   3  121.54    3.14
  -3   5  -3  120.73    3.17
   3   5   3  119.73    3.16
   3   5   3  126.04    4.15
   3   5   3  121.29    5.04
  -3   5  -3  131.65    4.96
  -3   5  -3  120.14    3.14
   3   5   3  121.93    3.17
   3   5   3  122.99    3.15
  -3   5  -3  133.23    4.11
  -5  -5  -3   32.05    0.84
  -5  -5  -3   31.02    0.86
   5  -5   3   31.96    0.87
   5  -5   3   33.22    2.92
   5  -5   3   32.05    0.85
  -5  -5  -3   31.61    0.84
   5  -5   3   29.79    1.80
  -5  -5  -3   31.25    0.86
   5  -5   3   31.14    0.88
  -5   5  -3   32.15    0.87
   5   5   3   28.29    0.91
   5   5   3   32.51    0.86
   5   5   3   29.65    2.74
  -5   5  -3   32.39    0.84
   5   5   3   31.07    0.87
   5   5   3   32.21    0.85
   5   5   3   31.73    3.24
  -5   5  -3   31.05    0.86
   5   5   3   32.44    1.87
  -5   5  -3   32.24    1.65
  -5   5  -3   29.81    2.34
  -7  -5  -3    6.04    0.23
  -7  -5  -3    5.52    0.18
  -7  -5  -3    5.46    0.25
   7  -5   3    5.56    0.25
   7  -5   3    5.21    0.25
   7  -5   3    5.58    0.22
  -7  -5  -3    5.35    0.25
  -7   5  -3    5.41    0.26
   7   5   3    4.98    1.20
   7   5   3    6.33    1.10
  -7   5  -3    5.44    0.26
   7   5   3    5.83    0.24
   7   5   3    5.64    0.25
   7   5   3    5.54    0.18
  -7   5  -3    4.52    0.76
   7   5   3    7.36    2.02
   7   5   3    5.43    0.24
   7   5   3    5.87    0.23
   7   5   3    7.40    2.24
  -7   5  -3    4.44    1.29
  -7   5  -3    5.94    0.22
   9  -5   3    9.54    0.30
   9  -5   3    9.30    0.35
   9  -5   3    9.31    0.35
  -9  -5  -3    9.31    0.35
  -9  -5  -3    9.50    0.35
  -9  -5  -3    9.27    0.33
  -9   5  -3    8.73    0.35
  -9   5  -3    9.72    0.32
   9   5   3    9.22    1.94
   9   5   3    8.82    1.35
   9   5   3   12.31    4.44
  -9   5  -3    8.50    0.34
   9   5   3    9.48    0.33
   9   5   3    8.87    0.35
   9   5   3   10.76    2.46
   9   5   3    9.41    0.33
 -11  -5  -3   10.31    0.39
 -11  -5  -3   10.27    0.38
  11  -5   3   10.38    0.38
 -11  -5  -3   10.33    0.37
  11   5   3    9.97    0.36
 -11   5  -3    9.71    0.39
  11   5   3   10.14    2.75
  11   5   3   12.81    2.00
  11   5   3   10.16    0.37
 -11   5  -3   10.02    0.39
 -11   5  -3   10.23    0.36
 -11   5  -3    9.61    0.38
  11   5   3    9.95    0.38
 -13  -5  -3    1.88    0.24
 -13  -5  -3    1.41    0.16
 -13  -5  -3    2.00    0.23
  13  -5   3    1.54    0.16
 -13   5  -3    1.68    0.22
 -13   5  -3    1.93    0.24
 -13   5  -3    1.89    0.20
  13   5   3    1.92    0.22
  13   5   3    1.76    0.21
 -13   5  -3    1.54    0.23
 -15  -5  -3    4.68    0.31
  15  -5   3    4.82    0.31
 -15  -5  -3    4.29    0.29
 -15  -5  -3    4.30    0.32
 -15   5  -3    4.36    0.30
 -15   5  -3    3.62    0.30
 -15   5  -3    4.54    0.27
 -15   5  -3    4.33    0.33
  15   5   3    4.26    0.32
 -17  -5  -3    4.49    0.33
 -17  -5  -3    4.75    0.36
 -17  -5  -3    4.76    0.34
 -17   5  -3    4.19    0.30
  17   5   3    4.38    0.31
 -17   5  -3    4.66    0.35
  17   5   3    4.42    0.32
 -17   5  -3    4.13    0.36
 -19  -5  -3    3.17    0.37
 -19  -5  -3    3.33    0.36
 -19  -5  -3    2.58    0.33
 -19   5  -3    3.48    0.43
 -19   5  -3    3.19    0.35
 -19   5  -3    3.73    0.37
  19   5   3    2.88    0.33
  19   5   3    3.39    0.33
 -19   5  -3    3.05    0.36
 -22  -6   3    1.41    0.23
 -22  -6   3    0.99    0.20
  22   6  -3    1.08    0.20
 -22   6   3    1.17    0.20
 -22   6   3    1.10    0.18
 -22   6   3    1.07    0.20
 -22   6   3    1.48    0.25
 -22   6   3    1.32    0.19
 -20  -6   3    1.59    0.21
  20  -6  -3    1.41    0.21
 -20  -6   3    1.23    0.20
 -20   6   3    1.23    0.26
 -20   6   3    1.86    0.25
 -20   6   3    1.84    0.26
 -20   6   3    1.47    0.22
  20   6  -3    1.29    0.20
 -20   6   3    1.89    0.21
  18  -6  -3    2.24    0.28
 -18  -6   3    2.15    0.29
 -18  -6   3    2.30    0.28
 -18  -6   3    2.13    0.22
 -18   6   3    2.10    0.27
  18   6  -3    2.61    0.29
  18   6  -3    2.34    0.28
 -18   6   3    2.32    0.27
 -18   6   3    2.38    0.25
 -18   6   3    2.49    0.24
 -18   6   3    2.04    0.29
  16  -6  -3    4.75    0.31
 -16  -6   3    4.91    0.30
 -16  -6   3    4.86    0.25
 -16  -6   3    5.07    0.33
 -16   6   3    4.81    0.26
 -16   6   3    5.26    0.32
 -16   6   3    4.65    0.32
  16   6  -3    4.79    0.28
 -16   6   3    4.47    0.27
  16   6  -3    4.50    0.45
 -16   6   3    5.09    0.29
 -14  -6   3    5.56    0.26
 -14  -6   3    5.53    0.30
 -14  -6   3    5.45    0.29
  14  -6  -3    5.75    0.31
  14   6  -3    5.82    0.29
  14   6  -3    5.87    0.25
  14   6  -3    5.84    0.30
  14   6  -3    5.63    0.31
 -14   6   3    5.49    0.28
 -14   6   3    5.43    0.27
 -14   6   3    5.70    0.29
 -14   6   3    5.77    0.28
 -14   6   3    5.52    0.31
  12  -6  -3    0.43    0.13
 -12  -6   3    0.43    0.12
 -12  -6   3    0.30    0.09
 -12  -6   3    0.65    1.19
 -12  -6   3    1.10    2.46
 -12  -6   3    0.31    0.10
  12   6  -3    0.52    0.13
  12   6  -3    0.42    0.13
 -12   6   3    0.34    0.11
  12   6  -3    0.42    0.12
  12   6  -3    1.18    1.51
  12   6  -3    0.33    0.10
 -12   6   3    0.38    0.11
 -12   6   3    0.45    0.14
 -12   6   3    0.52    0.11
 -10  -6   3   14.47    2.91
  10  -6  -3   13.13    0.46
 -10  -6   3   13.34    0.44
 -10  -6   3   13.41    0.43
 -10  -6   3   14.39    2.07
 -10  -6   3   13.66    0.42
  10   6  -3   16.54    1.85
  10   6  -3   13.23    0.44
 -10   6   3   13.48    0.44
 -10   6   3   12.86    0.46
 -10   6   3   12.53    2.45
  10   6  -3   13.53    0.45
  10   6  -3   13.60    0.45
  10   6  -3   13.44    2.41
 -10   6   3   13.77    0.44
  10   6  -3   13.56    0.42
 -10   6   3   14.18    0.44
 -10   6   3   13.14    1.74
  -8  -6   3   24.72    3.78
   8  -6  -3   28.01    0.80
  -8  -6   3   27.58    0.77
  -8  -6   3   25.59    2.18
  -8  -6   3   27.10    0.77
  -8  -6   3   27.55    0.77
   8  -6  -3   27.92    0.72
   8  -6  -3   23.71    2.77
  -8   6   3   28.30    0.77
   8   6  -3   29.21    2.06
   8   6  -3   27.44    0.78
  -8   6   3   27.66    0.80
  -8   6   3   29.36    1.74
   8   6  -3   26.61    0.77
   8   6  -3   29.57    3.31
   8   6  -3   28.40    0.76
  -8   6   3   27.44    0.77
  -8   6   3   24.99    2.91
  -8   6   3   28.26    0.75
  -8   6   3   26.37    0.77
   8   6  -3   27.33    0.78
  -6  -6   3   40.95    1.10
  -6  -6   3   41.38    1.10
   6  -6  -3   40.86    1.06
  -6  -6   3   41.21    1.09
  -6  -6   3   43.30    3.85
  -6  -6   3   42.13    1.08
   6  -6  -3   34.41    2.90
   6  -6  -3   39.77    1.11
  -6  -6   3   41.87    2.41
   6  -6  -3   38.15    1.97
   6   6  -3   41.48    1.09
  -6   6   3   39.15    1.09
   6   6  -3   40.42    1.11
  -6   6   3   41.16    1.99
  -6   6   3   40.90    1.07
   6   6  -3   38.80    2.17
   6   6  -3   41.29    1.06
   6   6  -3   40.73    1.10
   6   6  -3   40.80    1.10
  -6   6   3   41.23    1.10
  -6   6   3   40.74    1.10
  -6   6   3   40.86    3.03
  -6   6   3   40.25    1.11
   6   6  -3   42.03    3.45
  -4  -6   3   19.43    0.56
  -4  -6   3   19.08    0.55
   4  -6  -3   19.35    0.58
  -4  -6   3   16.78    2.68
  -4  -6   3   19.02    0.58
   4  -6  -3   19.03    0.54
  -4  -6   3   18.38    1.85
  -4  -6   3   18.46    0.57
   4  -6  -3   19.58    0.51
   4   6  -3   20.52    0.56
   4   6  -3   19.45    0.58
   4   6  -3   19.30    0.54
   4   6  -3   19.77    0.57
  -4   6   3   20.62    0.54
   4   6  -3   19.73    0.58
  -4   6   3   20.18    0.57
  -4   6   3   20.23    0.56
  -4   6   3   15.02    1.63
   4   6  -3   21.81    2.70
  -4   6   3   19.63    0.57
  -4   6   3   19.38    0.58
   4   6  -3   20.24    1.59
  -2  -6   3   46.74    3.97
  -2  -6   3   47.08    1.25
   2  -6  -3   41.48    2.23
  -2  -6   3   43.09    2.50
   2  -6  -3   46.94    1.24
   2  -6  -3   46.19    1.21
  -2  -6   3   46.46    1.21
   2  -6  -3   45.43    3.44
  -2  -6   3   47.69    1.24
  -2  -6   3   46.19    1.24
   2  -6  -3   46.85    1.19
   2   6  -3   45.86    1.24
   2   6  -3   47.15    1.23
  -2   6   3   46.16    1.24
   2   6  -3   45.35    2.28
   2   6  -3   42.34    3.42
  -2   6   3   46.19    1.24
  -2   6   3   46.94    1.21
  -2   6   3   46.99    1.25
   2   6  -3   45.99    1.21
  -2   6   3   48.93    1.23
   2   6  -3   46.67    1.24
  -2   6   3   46.58    2.16
   2   6  -3   46.96    1.24
   0  -6   3    2.49    1.95
   0  -6   3    2.16    0.19
   0  -6   3    1.73    0.91
   0  -6  -3    0.23    1.77
   0  -6   3    1.92    0.18
   0  -6  -3    1.90    0.12
   0  -6  -3    2.03    0.08
   0  -6   3    1.99    0.11
   0  -6  -3    2.09    0.15
   0  -6   3    1.95    0.17
   0  -6  -3    2.20    0.17
   0  -6   3    2.01    0.09
   0  -6  -3    1.67    0.75
   0   6  -3    1.90    0.19
   0   6   3    5.28    1.60
   0   6   3    2.15    0.12
   0   6   3    2.28    0.16
   0   6   3    2.02    0.17
   0   6  -3    2.01    0.17
   0   6  -3    3.58    0.89
   0   6  -3    1.87    1.63
   0   6   3    2.11    0.17
   0   6   3    2.14    0.74
   0   6  -3    2.25    0.18
   0   6   3    2.09    0.18
   0   6  -3    2.28    0.17
   0   6  -3    2.34    0.16
  -2  -6  -3   11.61    0.39
   2  -6   3   12.18    0.34
  -2  -6  -3   11.67    2.54
  -2  -6  -3   12.19    0.37
   2  -6   3   11.56    1.75
  -2  -6  -3   12.07    0.34
  -2  -6  -3   12.05    0.39
  -2  -6  -3    9.94    1.64
   2  -6   3   12.00    0.40
   2  -6   3   12.14    0.39
   2  -6   3   13.14    2.50
   2  -6   3   12.32    0.41
   2   6   3   11.92    0.40
  -2   6  -3   12.43    0.39
   2   6   3   12.10    0.38
  -2   6  -3   12.20    0.40
  -2   6  -3   15.28    2.60
   2   6   3   10.71    1.43
  -2   6  -3   12.51    0.40
  -2   6  -3   12.73    0.36
   2   6   3   11.42    0.39
   2   6   3   12.23    0.40
  -2   6  -3   12.43    1.36
  -2   6  -3   12.36    0.40
   2   6   3   10.09    2.11
  -2   6  -3   12.50    0.41
   4  -6   3   15.07    0.44
  -4  -6  -3   14.24    0.45
   4  -6   3   14.10    0.47
  -4  -6  -3   14.20    0.43
  -4  -6  -3   14.55    0.44
  -4  -6  -3   14.38    0.40
   4  -6   3   15.05    0.46
  -4   6  -3   15.97    2.68
  -4   6  -3   13.94    0.45
   4   6   3   14.05    0.45
   4   6   3   14.06    0.46
   4   6   3   14.02    0.42
   4   6   3   13.77    0.45
  -4   6  -3   14.21    0.46
   4   6   3   12.63    1.57
  -4   6  -3   12.87    0.44
  -4   6  -3   13.16    0.45
  -4   6  -3   14.32    0.46
   4   6   3   14.36    0.44
   4   6   3   10.64    2.06
  -4   6  -3   15.75    1.42
  -4   6  -3   14.17    0.45
   6  -6   3    1.27    0.20
  -6  -6  -3    1.67    0.14
   6  -6   3    1.37    0.17
   6  -6   3    1.56    0.20
  -6  -6  -3    1.45    0.13
  -6  -6  -3    1.45    0.18
  -6  -6  -3    1.44    0.19
   6   6   3    2.47    2.60
   6   6   3    1.15    0.13
   6   6   3    1.20    0.17
   6   6   3    1.26    0.15
  -6   6  -3    1.52    0.14
   6   6   3   -0.99    2.15
   6   6   3    0.16    0.97
  -6   6  -3    1.38    0.15
  -6   6  -3    1.38    0.20
  -6   6  -3    1.26    0.14
   6   6   3    1.06    1.18
   6   6   3    1.21    0.17
  -8  -6  -3   15.89    0.51
  -8  -6  -3   16.16    0.48
  -8  -6  -3   15.75    0.50
   8  -6   3   15.48    0.51
   8  -6   3   16.08    0.48
  -8  -6  -3   15.68    0.44
  -8   6  -3   15.50    0.52
   8   6   3   12.22    2.16
  -8   6  -3   15.69    0.50
   8   6   3   15.47    0.48
   8   6   3   11.99    3.19
   8   6   3   15.50    0.50
   8   6   3   15.32    0.51
  -8   6  -3   16.27    0.47
  10  -6   3    9.47    0.38
  10  -6   3    9.15    0.33
 -10  -6  -3    9.29    0.36
 -10  -6  -3    9.60    0.38
 -10  -6  -3    9.58    0.38
  10   6   3    9.26    0.35
  10   6   3    7.65    1.43
  10   6   3    9.28    0.36
 -10   6  -3    9.05    0.33
  10   6   3    9.69    0.38
  10   6   3    7.63    2.78
 -10   6  -3    8.89    0.38
 -10   6  -3    9.03    0.37
 -12  -6  -3    4.76    0.42
 -12  -6  -3    5.44    0.30
 -12  -6  -3    5.19    0.32
  12  -6   3    5.21    0.31
  12   6   3    5.38    0.32
  12   6   3    5.17    0.28
  12   6   3    5.52    0.30
 -12   6  -3    5.35    0.30
 -12   6  -3    5.58    0.28
 -12   6  -3    5.66    0.31
 -14  -6  -3    1.30    0.18
 -14  -6  -3    1.32    0.18
 -14  -6  -3    1.32    0.19
  14  -6   3    1.49    0.27
  14   6   3    1.27    0.16
  14   6   3    1.91    0.26
 -14   6  -3    2.03    0.26
 -14   6  -3    1.38    0.19
 -14   6  -3    1.46    0.18
 -16  -6  -3    0.78    0.18
 -16  -6  -3    1.08    0.19
  16  -6   3    0.96    0.20
 -16  -6  -3    1.05    0.20
  16   6   3    1.27    0.17
 -16   6  -3    1.31    0.20
  16   6   3    1.13    0.19
 -16   6  -3    1.45    0.20
 -18  -6  -3    7.10    0.41
 -18  -6  -3    6.83    0.44
 -18  -6  -3    7.32    0.43
 -18   6  -3    6.68    0.41
  18   6   3    6.89    0.39
 -18   6  -3    7.52    0.41
  18   6   3    7.09    0.40
 -21  -7   3    6.79    0.42
  21  -7  -3    6.85    0.45
 -21   7   3    7.95    0.50
 -21   7   3    6.25    0.37
 -21   7   3    7.39    0.39
  19  -7  -3   -0.11    0.19
 -19  -7   3   -0.02    0.18
 -19  -7   3    0.16    0.19
  19   7  -3   -0.06    0.20
  19   7  -3   -0.01    0.19
 -19   7   3   -0.11    0.16
 -19   7   3    0.19    0.21
 -19   7   3    0.14    0.15
 -19   7   3    0.32    0.17
 -17  -7   3    4.40    0.29
  17  -7  -3    4.27    0.35
 -17  -7   3    4.31    0.35
 -17  -7   3    4.82    0.33
 -17   7   3    4.35    0.37
 -17   7   3    4.08    0.30
  17   7  -3    4.58    0.33
 -17   7   3    4.88    0.33
  17   7  -3    4.91    0.34
 -17   7   3    4.06    0.31
  15  -7  -3    4.12    0.32
 -15  -7   3    4.13    0.33
 -15  -7   3    3.75    0.31
  15   7  -3    4.01    0.30
 -15   7   3    3.84    0.26
  15   7  -3    4.09    0.30
 -15   7   3    4.04    0.29
 -15   7   3    4.10    0.33
 -15   7   3    3.65    0.27
  13  -7  -3    8.76    0.53
 -13  -7   3    9.44    0.39
 -13  -7   3    9.11    0.37
 -13  -7   3    9.45    0.39
 -13   7   3   10.15    0.42
  13   7  -3    9.42    0.47
  13   7  -3   10.05    0.37
 -13   7   3   10.14    0.38
 -13   7   3    9.61    0.45
  13   7  -3   10.11    0.40
  13   7  -3    9.92    0.41
 -13   7   3    9.29    0.39
 -11  -7   3    0.43    0.13
 -11  -7   3    0.56    0.12
 -11  -7   3    0.46    0.13
  11  -7  -3    1.03    0.16
 -11  -7   3    0.48    0.11
 -11   7   3    0.62    0.11
 -11   7   3    0.67    0.13
  11   7  -3    0.56    0.15
 -11   7   3    0.62    0.13
 -11   7   3    0.59    0.13
  11   7  -3    0.65    0.12
  11   7  -3    0.57    0.14
  11   7  -3    0.63    0.13
 -11   7   3    0.48    0.15
   9  -7  -3   15.52    0.52
  -9  -7   3   15.87    0.51
  -9  -7   3   14.99    2.07
  -9  -7   3   14.44    0.49
  -9  -7   3   15.20    0.49
  -9  -7   3   10.48    3.65
   9   7  -3   15.46    3.48
   9   7  -3   15.11    0.51
  -9   7   3   14.61    0.49
   9   7  -3   15.13    0.50
   9   7  -3   15.14    0.50
  -9   7   3   14.94    0.49
   9   7  -3   15.20    0.48
   9   7  -3   12.89    2.25
  -9   7   3   15.16    0.52
  -9   7   3   15.02    0.46
  -9   7   3   15.49    0.50
  -7  -7   3   15.99    0.49
  -7  -7   3   16.33    0.51
   7  -7  -3   14.99    0.52
  -7  -7   3   15.18    3.71
  -7  -7   3   14.55    2.50
  -7  -7   3   15.49    0.50
   7   7  -3   15.79    0.51
  -7   7   3   15.93    0.47
   7   7  -3   15.31    0.51
  -7   7   3   15.35    0.52
   7   7  -3   14.92    2.12
   7   7  -3   17.96    2.98
   7   7  -3   16.06    0.49
  -7   7   3   15.50    0.50
  -7   7   3   15.69    0.50
   7   7  -3   15.68    0.51
  -7   7   3   15.67    0.50
  -5  -7   3    6.64    1.58
   5  -7  -3    4.33    0.26
  -5  -7   3    4.25    0.22
   5  -7  -3    4.30    0.20
  -5  -7   3    4.22    0.25
  -5  -7   3    4.34    3.15
  -5  -7   3    4.18    0.24
   5   7  -3    4.28    0.23
  -5   7   3    4.31    0.24
   5   7  -3    3.86    0.24
   5   7  -3    3.88    0.25
  -5   7   3    4.54    0.20
   5   7  -3    3.75    1.11
  -5   7   3    4.22    0.27
  -5   7   3    4.15    0.25
   5   7  -3    4.24    0.25
  -5   7   3    4.01    0.25
   5   7  -3    1.17    2.15
  -3  -7   3   15.32    0.51
   3  -7  -3   16.06    0.47
  -3  -7   3   16.28    0.52
  -3  -7   3   15.58    0.47
   3  -7  -3   16.02    0.53
  -3  -7   3   15.84    0.47
  -3   7   3   15.96    0.51
  -3   7   3   16.69    0.52
   3   7  -3   16.48    0.52
   3   7  -3   16.01    0.52
  -3   7   3   16.28    0.47
   3   7  -3   16.69    0.48
   3   7  -3   16.62    0.53
  -3   7   3   16.34    0.53
  -3   7   3   16.88    0.51
   3   7  -3   16.55    0.51
  -1  -7   3   17.05    0.57
  -1  -7   3   17.50    0.50
   1  -7  -3   17.59    0.56
   1  -7  -3   17.65    0.52
   1  -7  -3   17.12    0.49
  -1  -7   3   17.41    0.55
  -1  -7   3   17.04    0.49
  -1   7   3   18.36    0.54
  -1   7   3   18.79    0.52
  -1   7   3   18.23    0.57
   1   7  -3   17.51    0.55
  -1   7   3   17.86    0.55
   1   7  -3   18.10    0.56
  -1   7   3   18.58    0.56
   1   7  -3   18.73    0.54
   1   7  -3   18.41    0.55
   1   7  -3   18.21    0.56
   1  -7   3    3.72    0.24
   1  -7   3    3.62    0.25
  -1  -7  -3    3.68    0.23
  -1  -7  -3    3.77    0.22
  -1  -7  -3    3.75    0.19
  -1   7  -3    3.62    0.24
   1   7   3    3.97    0.25
   1   7   3    3.97    0.23
   1   7   3    3.66    0.23
  -1   7  -3    3.89    0.24
  -1   7  -3    3.43    0.25
  -1   7  -3    3.96    0.23
   1   7   3    3.49    0.22
  -1   7  -3    3.95    0.23
   1   7   3    3.96    0.19
   3  -7   3   41.12    1.10
  -3  -7  -3   40.13    1.10
  -3  -7  -3   40.28    1.10
  -3  -7  -3   40.70    1.08
   3  -7   3   40.21    1.13
  -3   7  -3   40.49    1.11
   3   7   3   40.18    1.11
   3   7   3   41.21    1.10
  -3   7  -3   38.35    1.11
   3   7   3   41.70    1.08
  -3   7  -3   39.75    1.12
   3   7   3   39.81    1.11
  -3   7  -3   39.77    1.11
   3   7   3   40.22    1.10
  -3   7  -3   38.93    1.10
  -5  -7  -3   36.47    1.00
  -5  -7  -3   36.55    1.01
   5  -7   3   36.27    1.01
   5  -7   3   35.38    1.04
  -5  -7  -3   36.27    1.02
  -5   7  -3   37.20    1.02
   5   7   3   37.07    1.02
  -5   7  -3   36.55    1.03
   5   7   3   36.28    1.03
   5   7   3   36.60    1.01
  -5   7  -3   36.96    0.97
  -5   7  -3   35.54    1.03
   5   7   3   37.30    0.99
  -5   7  -3   36.16    1.02
  -5   7  -3   35.92    1.02
  -7  -7  -3    3.49    0.19
   7  -7   3    3.40    0.27
  -7  -7  -3    3.86    0.26
  -7  -7  -3    3.54    0.25
   7  -7   3    3.36    0.24
  -7  -7  -3    3.41    0.21
   7   7   3    3.15    0.26
   7   7   3    3.38    0.21
  -7   7  -3    3.38    0.26
  -7   7  -3    3.21    0.26
   7   7   3    3.30    0.25
   7   7   3    3.26    0.24
  -7   7  -3    2.91    0.25
  -7   7  -3    3.42    0.25
  -7   7  -3    2.90    0.27
  -9  -7  -3   14.01    0.49
   9  -7   3   13.82    0.46
  -9  -7  -3   14.21    0.46
  -9   7  -3   13.25    0.49
   9   7   3   13.41    0.48
   9   7   3   12.86    0.48
  -9   7  -3   13.28    0.48
  -9   7  -3   13.37    0.50
   9   7   3   13.87    0.46
  -9   7  -3   13.92    0.51
 -11  -7  -3   13.26    0.50
 -11  -7  -3   12.73    0.47
 -11  -7  -3   13.18    0.50
  11  -7   3   12.98    0.51
 -11   7  -3   12.91    0.50
  11   7   3   12.93    0.49
  11   7   3   13.29    0.46
 -11   7  -3   12.84    0.49
  11   7   3   13.55    0.48
 -11   7  -3   13.26    0.49
 -13  -7  -3    4.77    0.35
  13  -7   3    4.75    0.35
 -13  -7  -3    4.38    0.34
 -13  -7  -3    4.55    0.33
 -13   7  -3    4.15    0.32
  13   7   3    4.76    0.32
 -13   7  -3    4.06    0.32
 -13   7  -3    4.19    0.34
  13   7   3    4.69    0.30
  13   7   3    3.81    0.33
  15  -7   3    3.93    0.39
 -15  -7  -3    3.89    0.37
 -15  -7  -3    4.40    0.38
 -15  -7  -3    4.36    0.36
 -15   7  -3    3.75    0.34
  15   7   3    4.15    0.32
 -15   7  -3    4.55    0.34
 -15   7  -3    4.38    0.38
  15   7   3    4.48    0.36
 -17  -7  -3    6.59    0.50
  17   7   3    6.14    0.36
 -18  -8   3    3.38    0.37
 -18  -8   3    3.08    0.37
  18  -8  -3    3.77    0.38
 -18  -8   3    3.48    0.38
 -18   8   3    4.08    0.39
  18   8  -3    3.65    0.36
 -18   8   3    3.28    0.36
 -18   8   3    3.79    0.32
  18   8  -3    3.55    0.38
 -18   8   3    3.35    0.32
 -16  -8   3   11.10    0.45
 -16  -8   3   10.31    0.48
 -16  -8   3   10.79    0.49
 -16  -8   3   10.19    0.47
  16  -8  -3   11.11    0.50
  16   8  -3   11.21    0.48
 -16   8   3    9.83    0.45
 -16   8   3   10.51    0.45
 -16   8   3   10.19    0.50
  16   8  -3   10.74    0.48
 -16   8   3   11.07    0.48
 -14  -8   3    7.41    0.39
 -14  -8   3    7.12    0.38
  14  -8  -3    7.59    0.43
 -14  -8   3    7.09    0.36
 -14   8   3    7.15    0.37
  14   8  -3    7.70    0.40
  14   8  -3    7.40    0.39
 -14   8   3    8.36    0.38
  14   8  -3    7.33    0.40
 -14   8   3    7.45    0.43
 -14   8   3    7.88    0.37
  12  -8  -3    1.02    0.19
 -12  -8   3    0.69    0.17
 -12  -8   3    0.84    0.15
 -12  -8   3    0.79    0.16
 -12   8   3    0.73    0.19
 -12   8   3    0.86    0.15
 -12   8   3    1.16    0.17
  12   8  -3    0.82    0.16
  12   8  -3    0.89    0.16
 -12   8   3    0.69    0.16
  12   8  -3    0.65    0.16
  12   8  -3    0.96    0.18
 -12   8   3    0.94    0.17
 -10  -8   3    6.37    0.31
 -10  -8   3    6.40    0.32
 -10  -8   3    6.23    0.31
  10  -8  -3    5.94    0.35
 -10  -8   3    5.97    0.33
  10   8  -3    6.21    0.31
 -10   8   3    6.29    0.32
  10   8  -3    6.46    0.35
 -10   8   3    6.71    0.29
 -10   8   3    6.67    0.45
  10   8  -3    5.91    0.33
 -10   8   3    6.28    0.32
  10   8  -3    5.84    0.34
 -10   8   3    5.98    0.36
   8  -8  -3   29.23    0.88
  -8  -8   3   29.34    0.85
  -8  -8   3   29.36    0.83
  -8  -8   3   28.82    0.89
  -8  -8   3   28.98    0.84
  -8   8   3   27.51    1.06
   8   8  -3   28.73    0.84
   8   8  -3   29.35    0.87
  -8   8   3   27.72    0.92
   8   8  -3   29.88    0.86
  -8   8   3   29.97    0.85
  -8   8   3   28.63    0.85
  -8   8   3   29.54    0.82
  -6  -8   3   11.50    0.56
  -6  -8   3   12.30    0.43
  -6  -8   3   13.08    0.46
  -6  -8   3   12.00    0.42
   6  -8  -3   12.34    0.49
  -6   8   3   13.04    0.41
  -6   8   3   13.13    0.45
   6   8  -3   12.88    0.46
  -6   8   3   12.52    0.48
  -6   8   3   12.80    0.46
   6   8  -3   12.55    0.44
   6   8  -3   12.64    0.46
   6   8  -3   13.03    0.52
  -4  -8   3    3.90    0.27
  -4  -8   3    4.10    0.21
  -4  -8   3    4.27    0.22
   4  -8  -3    4.15    0.28
  -4  -8   3    3.92    0.26
  -4   8   3    3.70    0.21
   4   8  -3    3.65    0.25
   4   8  -3    3.34    0.27
   4   8  -3    3.52    0.27
  -4   8   3    3.35    0.25
  -4   8   3    3.47    0.26
   4   8  -3    3.82    0.26
  -4   8   3    3.56    0.26
  -4   8   3    3.91    0.29
   2  -8  -3   28.76    0.87
   2  -8  -3   29.65    0.82
  -2  -8   3   30.47    0.88
  -2  -8   3   30.24    0.86
   2   8  -3   29.50    0.86
  -2   8   3   29.39    0.86
  -2   8   3   29.67    0.85
  -2   8   3   29.87    0.87
   2   8  -3   30.05    0.87
   2   8  -3   29.31    0.87
  -2   8   3   29.98    0.82
   2   8  -3   29.41    0.85
  -2   8   3   29.05    0.86
   2   8  -3   29.89    0.84
   0  -8  -3   10.37    0.37
   0  -8   3   10.14    0.42
   0  -8  -3   10.27    0.40
   0  -8   3   10.10    0.40
   0   8   3   10.16    0.40
   0   8   3   10.30    0.36
   0   8  -3   10.28    0.40
   0   8   3   10.24    0.39
   0   8  -3   10.44    0.39
   0   8   3   10.26    0.42
   0   8  -3   10.23    0.40
   0   8   3   10.24    0.40
   0   8  -3    9.93    0.41
   0   8  -3   10.58    0.42
  -2  -8  -3   32.80    0.95
   2  -8   3   32.56    0.90
  -2  -8  -3   31.27    0.89
   2  -8   3   28.19    1.03
  -2  -8  -3   31.69    0.88
  -2   8  -3   27.77    1.01
  -2   8  -3   31.10    0.90
   2   8   3   31.61    0.88
   2   8   3   30.52    0.91
   2   8   3   30.57    0.85
  -2   8  -3   31.87    0.90
   2   8   3   29.49    1.02
   2   8   3   31.61    0.90
  -2   8  -3   31.63    0.89
  -2   8  -3   28.80    1.02
  -4  -8  -3   40.03    1.10
  -4  -8  -3   41.16    1.11
   4  -8   3   40.28    1.11
   4  -8   3   40.28    1.14
  -4  -8  -3   40.95    1.09
   4   8   3   40.34    1.13
  -4   8  -3   39.17    1.12
   4   8   3   39.67    1.10
  -4   8  -3   38.93    1.13
  -4   8  -3   38.80    1.13
   4   8   3   36.43    1.25
  -4   8  -3   39.29    1.12
   4   8   3   40.98    1.09
  -4   8  -3   39.66    1.13
  -6  -8  -3    7.95    0.33
   6  -8   3    7.73    0.36
   6  -8   3    7.85    0.39
  -6  -8  -3    8.49    0.37
   6   8   3    8.24    0.35
   6   8   3    8.02    0.38
   6   8   3    8.70    0.37
  -6   8  -3    8.36    0.37
   6   8   3    8.23    0.33
  -6   8  -3    8.69    0.40
  -6   8  -3    8.04    0.39
  -6   8  -3    8.11    0.38
  -6   8  -3    8.32    0.38
  -8  -8  -3    5.32    0.34
   8  -8   3    5.66    0.33
   8  -8   3    5.76    0.36
  -8   8  -3    5.77    0.33
   8   8   3    5.59    0.35
  -8   8  -3    5.72    0.35
  -8   8  -3    5.88    0.35
   8   8   3    6.32    0.32
  -8   8  -3    5.88    0.34
  -8   8  -3    5.98    0.36
   8   8   3    5.92    0.33
   8   8   3    5.97    0.30
 -10  -8  -3   17.90    0.62
 -10  -8  -3   18.11    0.63
  10  -8   3   17.67    0.64
 -10   8  -3   18.18    0.62
 -10   8  -3   17.73    0.63
  10   8   3   17.58    0.59
  10   8   3   17.71    0.61
 -10   8  -3   18.42    0.63
  10   8   3   17.87    0.63
 -10   8  -3   18.38    0.66
 -10   8  -3   18.14    0.63
 -12  -8  -3    2.76    0.36
  12  -8   3    2.30    0.35
 -12  -8  -3    3.28    0.36
  12   8   3    2.77    0.33
 -12   8  -3    3.79    0.34
 -12   8  -3    3.46    0.39
 -12   8  -3    2.74    0.35
  12   8   3    3.56    0.33
 -12   8  -3    3.27    0.34
 -12   8  -3    2.94    0.32
 -14  -8  -3    3.51    0.37
  14  -8   3    3.00    0.39
 -14  -8  -3    2.86    0.37
  14   8   3    3.40    0.36
 -14   8  -3    2.74    0.38
  14   8   3    2.88    0.37
 -14   8  -3    3.42    0.39
 -14   8  -3    3.46    0.39
 -14   8  -3    3.80    0.37
 -15  -9   3    8.26    0.47
  15  -9  -3    8.89    0.48
 -15  -9   3    8.32    0.42
 -15  -9   3    8.29    0.46
  15   9  -3    8.11    0.44
 -15   9   3    8.32    0.42
 -15   9   3    9.26    0.44
 -15   9   3    8.47    0.51
 -15   9   3    8.39    0.42
  15   9  -3    8.12    0.45
 -13  -9   3    4.61    0.37
 -13  -9   3    4.34    0.37
  13  -9  -3    3.60    0.39
 -13  -9   3    4.39    0.34
 -13   9   3    4.94    0.40
 -13   9   3    4.07    0.35
 -13   9   3    4.16    0.35
 -13   9   3    4.39    0.36
  13   9  -3    3.78    0.37
  13   9  -3    3.45    0.38
  13   9  -3    3.88    0.36
 -11  -9   3    1.21    0.19
 -11  -9   3    1.78    0.21
  11  -9  -3    1.87    0.24
 -11  -9   3    1.57    0.20
  11   9  -3    1.63    0.21
  11   9  -3    1.16    0.19
 -11   9   3    1.51    0.20
 -11   9   3    1.44    0.20
 -11   9   3    1.39    0.20
  11   9  -3    1.26    0.20
  11   9  -3    1.70    0.23
 -11   9   3    1.83    0.25
  -9  -9   3    6.13    0.35
   9  -9  -3    5.56    0.38
  -9  -9   3    6.33    0.34
  -9  -9   3    6.55    0.34
  -9   9   3    5.77    0.35
  -9   9   3    6.49    0.41
   9   9  -3    5.86    0.34
   9   9  -3    5.85    0.38
  -9   9   3    5.90    0.36
   9   9  -3    5.94    0.35
   9   9  -3    6.11    0.38
  -9   9   3    5.53    0.35
  -7  -9   3   17.12    0.60
  -7  -9   3   17.15    0.59
   7  -9  -3   16.53    0.62
  -7   9   3   17.55    0.60
  -7   9   3   17.69    0.63
   7   9  -3   16.87    0.61
   7   9  -3   17.02    0.59
   7   9  -3   17.77    0.58
  -7   9   3   17.38    0.60
  -7   9   3   18.02    0.59
   7   9  -3   17.78    0.61
  -5  -9   3   13.96    0.53
  -5  -9   3   15.32    0.55
   5  -9  -3   15.09    0.55
   5   9  -3   14.61    0.55
   5   9  -3   15.10    0.54
  -5   9   3   15.19    0.57
  -5   9   3   15.46    0.54
   5   9  -3   14.89    0.55
  -5   9   3   15.41    0.53
   5   9  -3   15.11    0.53
  -5   9   3   15.49    0.54
  -3  -9   3    3.91    0.30
   3  -9  -3    3.04    0.29
  -3  -9   3    3.49    0.30
   3   9  -3    3.47    0.29
  -3   9   3    3.72    0.30
   3   9  -3    3.63    0.32
   3   9  -3    3.63    0.29
  -3   9   3    3.98    0.29
  -3   9   3    4.04    0.33
  -3   9   3    3.68    0.29
   3   9  -3    3.94    0.31
   1  -9  -3    9.01    0.39
  -1  -9   3    9.17    0.41
  -1  -9   3    9.18    0.42
   1   9  -3    8.26    0.40
   1   9  -3    8.35    0.41
  -1   9   3    8.73    0.39
   1   9  -3    8.92    0.40
  -1   9   3    8.80    0.42
  -1   9   3    8.96    0.40
   1   9  -3    8.46    0.39
  -1   9   3    9.03    0.39
   1  -9   3    0.87    0.19
  -1  -9  -3    0.59    0.15
  -1  -9  -3    0.67    0.15
   1  -9   3    0.85    0.17
  -1   9  -3    0.71    0.19
   1   9   3    0.97    0.21
  -1   9  -3    0.85    0.17
  -1   9  -3    0.90    0.17
   1   9   3    0.78    0.15
  -1   9  -3    0.89    0.16
   1   9   3    0.76    0.16
  -1   9  -3    1.00    0.18
   1   9   3    0.85    0.17
   3  -9   3    2.02    0.29
  -3  -9  -3    1.72    0.26
   3  -9   3    1.96    0.29
   3   9   3    1.40    0.19
   3   9   3    1.55    0.19
  -3   9  -3    1.94    0.20
  -3   9  -3    1.64    0.19
   3   9   3    1.90    0.25
   3   9   3    1.75    0.19
  -3   9  -3    1.92    0.21
  -3   9  -3    1.23    0.19
   5  -9   3   10.17    0.45
   5  -9   3   10.28    0.48
  -5  -9  -3   10.08    0.45
  -5   9  -3   10.57    0.47
   5   9   3   10.12    0.44
  -5   9  -3   10.12    0.46
   5   9   3   11.00    0.43
  -5   9  -3   10.13    0.46
  -5   9  -3    9.69    0.45
  -5   9  -3   10.82    0.45
   5   9   3   10.08    0.45
  -7  -9  -3    1.13    0.20
   7  -9   3    1.26    0.21
   7  -9   3    1.29    0.20
  -7   9  -3    1.16    0.21
   7   9   3    1.15    0.20
   7   9   3    1.32    0.21
  -7   9  -3    1.33    0.23
  -7   9  -3    0.95    0.18
  -7   9  -3    1.33    0.21
  -7   9  -3    1.58    0.21
   7   9   3    1.50    0.20
  -9  -9  -3    6.02    0.42
   9  -9   3    5.56    0.41
  -9  -9  -3    5.75    0.41
  -9   9  -3    5.27    0.39
   9   9   3    5.30    0.38
  -9   9  -3    5.69    0.38
  -9   9  -3    5.52    0.38
   9   9   3    5.26    0.39
  -9   9  -3    5.60    0.42
  -9   9  -3    5.54    0.38
  11  -9   3    5.50    0.40
 -11  -9  -3    4.99    0.40
 -11  -9  -3    5.23    0.42
 -11   9  -3    5.49    0.38
  11   9   3    4.97    0.38
 -11   9  -3    5.47    0.43
 -10 -10   3    2.59    0.35
  10  10  -3    1.72    0.23
  10  10  -3    1.44    0.21
  10  10  -3    1.68    0.28
 -10  10   3    1.15    0.27
 -10  10   3    1.62    0.21
 -10  10   3    1.71    0.21
   8 -10  -3    4.14    0.40
  -8 -10   3    4.30    0.35
  -8 -10   3    4.97    0.34
   8  10  -3    4.05    0.37
  -8  10   3    4.91    0.42
  -8  10   3    4.40    0.35
   8  10  -3    4.49    0.35
  -8  10   3    4.49    0.37
   8  10  -3    4.64    0.35
   8  10  -3    3.96    0.39
  -8  10   3    4.97    0.36
  -6 -10   3    0.28    0.17
   6 -10  -3    0.41    0.19
  -6 -10   3    0.13    0.17
   6  10  -3    0.19    0.18
  -6  10   3    0.45    0.18
   6  10  -3    0.24    0.18
  -6  10   3    0.37    0.18
  -6  10   3    0.54    0.18
   6  10  -3    0.22    0.19
  -6  10   3    0.44    0.22
   6  10  -3    0.25    0.17
   4 -10  -3    0.93    0.20
  -4 -10   3    0.56    0.27
  -4 -10   3    0.36    0.18
   4  10  -3    0.30    0.20
   4  10  -3    0.75    0.18
   4  10  -3    0.58    0.18
  -4  10   3    0.71    0.18
  -4  10   3    0.87    0.23
   4  10  -3    0.75    0.20
  -4  10   3    0.65    0.18
  -4  10   3    0.61    0.18
   2 -10  -3    0.19    0.17
  -2 -10   3    0.13    0.17
  -2 -10   3    0.08    0.16
  -2  10   3    0.27    0.17
   2  10  -3    0.37    0.18
  -2  10   3    0.27    0.18
   2  10  -3   -0.02    0.18
  -2  10   3    0.28    0.18
  -2  10   3    0.69    0.22
   2  10  -3    0.40    0.18
   2  10  -3    0.28    0.17
   0 -10   3    2.31    0.34
   0 -10  -3    2.35    0.31
   0 -10   3    1.76    0.22
   0  10  -3    2.66    0.35
   0  10   3    2.73    0.33
   0  10   3    2.48    0.30
   0  10  -3    1.90    0.23
   0  10   3    2.26    0.33
   0  10  -3    2.36    0.24
   0  10  -3    2.33    0.30
   0  10   3    2.35    0.36
   2 -10   3    3.93    0.37
  -2 -10  -3    3.30    0.31
   2 -10   3    3.29    0.37
   2  10   3    3.50    0.32
  -2  10  -3    2.98    0.36
  -2  10  -3    3.62    0.34
  -2  10  -3    3.74    0.36
   2  10   3    3.57    0.34
  -2  10  -3    3.31    0.36
   2  10   3    3.06    0.36
   4 -10   3   13.43    0.57
   4 -10   3   13.13    0.55
  -4  10  -3   13.39    0.55
   4  10   3   13.33    0.52
  -4  10  -3   12.91    0.54
  -4  10  -3   13.38    0.56
  -4  10  -3   13.60    0.53
   4  10   3   13.88    0.55
   4  10   3   12.82    0.54
   6  10   3    3.85    0.33
   6  10   3    3.31    0.34
  -6  10  -3    3.40    0.35
  -8 -10  -3   -0.25    0.23
 -26   0   4    6.28    0.40
 -26   0   4    6.42    0.41
 -26   0   4    6.35    0.34
 -26   0   4    6.16    0.39
  26   0  -4    6.56    0.40
 -24   0   4    5.56    0.34
  24   0  -4    5.66    0.35
 -24   0   4    6.29    0.34
 -24   0   4    5.82    0.35
  22   0  -4    0.12    0.14
 -22   0   4    0.25    0.14
 -22   0   4    0.38    0.14
 -22   0   4    0.34    0.12
  20   0  -4   10.27    0.78
  20   0  -4   10.91    0.40
 -20   0   4   10.22    0.40
  20   0  -4    9.95    1.41
 -20   0   4   10.75    0.37
 -20   0   4   10.66    0.40
  18   0  -4   76.04    2.30
  18   0  -4   75.19    2.71
 -18   0   4   75.34    2.04
  18   0  -4   79.20    2.70
  18   0  -4   79.66    2.30
 -18   0   4   77.65    1.97
  18   0  -4   77.93    2.03
 -18   0   4   79.35    2.02
 -16   0   4    4.56    0.14
  16   0  -4    4.07    0.52
  16   0  -4    4.57    0.75
 -16   0   4    4.19    0.19
  16   0  -4    6.32    0.94
 -16   0   4    3.99    0.21
 -16   0   4    4.39    0.14
  16   0  -4    4.27    0.47
  16   0  -4    3.95    0.21
  14   0  -4  295.13    7.71
  14   0  -4  296.81    7.93
  14   0  -4  299.51    7.71
  14   0  -4  298.88    7.94
  12   0  -4  128.11    3.24
  12   0  -4  117.83    3.06
 -12   0   4  115.72    3.05
 -12   0   4  118.57    3.06
 -12   0   4  119.60    3.04
  12   0  -4  122.99    3.42
  12   0  -4  122.99    3.23
  12   0  -4  116.90    3.07
  12   0  -4  126.46    3.43
  12   0  -4  116.64    3.07
  10   0  -4    4.32    0.47
  10   0  -4    4.58    0.29
  10   0  -4    4.04    0.15
 -10   0   4    4.12    0.13
  10   0  -4    3.87    0.15
 -10   0   4    3.85    0.13
 -10   0   4    4.25    0.13
  10   0  -4    3.83    0.15
 -10   0   4    4.14    0.12
   8   0  -4  151.84    3.93
   8   0  -4  147.47    4.07
  -8   0   4  149.91    4.08
  -8   0   4  150.90    3.93
   6   0  -4    8.17    0.24
   6   0  -4    8.04    0.24
  -6   0   4    8.73    0.23
  -6   0   4    9.13    0.23
   6   0  -4    8.06    0.23
  -6   0   4    8.16    0.24
  -6   0   4    8.33    0.61
  -6   0   4    8.29    0.23
  -6   0   4    8.33    0.23
  -6   0   4    8.45    0.23
  -6   0   4    8.19    0.41
  -6   0   4    8.46    0.21
   6   0  -4    7.75    0.56
   6   0  -4    8.21    0.23
   6   0  -4    7.53    0.39
  -4   0   4    0.02    0.03
   4   0  -4    0.07    0.04
  -4   0   4    0.08    0.04
   4   0  -4    0.04    0.03
  -4   0   4    0.02    0.03
  -4   0   4    0.01    0.03
  -4   0   4    0.09    0.27
   4   0  -4    0.06    0.13
   4   0  -4    0.14    0.03
  -4   0   4    0.08    0.02
  -4   0   4    0.06    0.14
  -4   0   4    0.05    0.03
   4   0  -4    0.07    0.01
  -4   0   4    0.17    0.04
  -4   0   4    0.03    0.02
  -4   0   4    0.06    0.03
  -4   0   4    0.06    0.02
   4   0  -4    0.01    0.25
   4   0  -4    0.04    0.03
   4   0  -4    0.04    0.02
   4   0  -4    0.02    0.04
   4   0  -4    0.10    0.02
  -2   0   4   31.15    0.86
   2   0  -4   35.21    0.86
  -2   0   4   32.66    0.86
  -2   0   4   33.06    0.86
   2   0  -4   34.50    0.86
  -2   0   4   32.49    0.85
   2   0  -4   33.64    0.86
   2   0  -4   34.03    1.42
  -2   0   4   34.83    0.86
   2   0  -4   35.17    0.86
   2   0  -4   33.22    1.16
  -2   0   4   34.72    1.17
   2   0  -4   33.29    0.86
  -2   0   4   34.05    0.86
   2   0  -4   32.80    0.86
  -2   0   4   32.40    0.86
  -2   0   4   32.76    0.86
   2   0  -4   32.30    0.85
  -2   0   4   34.37    1.45
   0   0  -4    0.53    0.06
   0   0  -4    0.47    0.04
   0   0   4    0.29    0.21
   0   0  -4    0.44    0.07
   0   0   4    0.47    0.04
   0   0   4    0.93    0.49
   0   0  -4    0.42    0.06
   0   0   4    0.57    0.05
   0   0   4    0.46    0.06
   0   0  -4    0.79    0.24
   0   0  -4    0.52    0.06
   0   0   4    0.50    0.06
   0   0  -4    0.54    0.38
   0   0   4    0.45    0.06
   0   0  -4    0.47    0.05
   2   0   4    8.50    1.08
   2   0   4   12.05    0.30
   2   0   4   10.14    0.72
  -2   0  -4   11.00    1.03
  -2   0  -4   10.57    0.69
   2   0   4   11.31    0.31
  -2   0  -4   11.04    0.30
  -2   0  -4   11.14    0.30
  -2   0  -4   10.91    0.31
   2   0   4   11.03    0.30
  -2   0  -4   11.30    0.31
   2   0   4   11.51    0.30
  -4   0  -4    0.26    0.27
  -4   0  -4    0.02    0.04
   4   0   4    0.13    0.03
   4   0   4    0.08    0.04
  -4   0  -4    0.08    0.51
   4   0   4    0.13    0.03
  -4   0  -4    0.02    0.04
   4   0   4    0.37    0.31
  -4   0  -4    0.17    0.04
   4   0   4    0.62    0.66
  -6   0  -4  219.29    6.71
   6   0   4  212.92    6.11
  -6   0  -4  218.17    6.10
   6   0   4  206.96    6.73
  -8   0  -4    4.83    0.74
  -8   0  -4    4.40    0.19
  -8   0  -4    2.77    0.89
   8   0   4    3.23    1.18
   8   0   4    3.73    0.68
  -8   0  -4    4.08    0.19
  -8   0  -4    4.26    0.20
   8   0   4    4.41    0.13
   8   0   4    4.16    0.19
   8   0   4    4.22    0.15
  -8   0  -4    4.38    0.17
   8   0   4    4.42    0.12
   8   0   4    4.46    0.13
 -10   0  -4    2.98    0.18
  10   0   4    3.47    0.74
  10   0   4    2.87    0.10
 -10   0  -4    2.41    0.18
  10   0   4    2.97    0.09
 -10   0  -4    3.50    0.62
  10   0   4    2.84    0.11
 -10   0  -4    2.87    0.17
 -10   0  -4    2.60    0.18
 -10   0  -4    3.68    1.09
  10   0   4    2.79    0.18
 -10   0  -4    2.96    0.17
  10   0   4    2.21    1.30
  12   0   4    4.61    0.16
 -12   0  -4    3.70    1.45
 -12   0  -4    4.62    0.24
  12   0   4    4.75    0.24
 -12   0  -4    4.68    0.23
 -12   0  -4    4.52    0.23
 -12   0  -4    4.68    0.20
 -12   0  -4    4.56    0.87
 -12   0  -4    4.49    0.23
 -14   0  -4   21.48    0.65
 -14   0  -4   21.54    0.65
 -14   0  -4   21.33    0.66
 -14   0  -4   22.45    0.63
 -14   0  -4   22.23    0.65
 -16   0  -4    5.43    0.26
 -16   0  -4    4.82    0.30
 -16   0  -4    5.58    0.30
 -16   0  -4    5.20    0.29
 -16   0  -4    5.75    0.28
 -18   0  -4    7.84    0.38
 -18   0  -4    7.55    0.40
 -18   0  -4    8.26    0.38
 -18   0  -4    8.15    0.34
 -18   0  -4    8.29    0.38
 -20   0  -4    1.69    0.19
 -20   0  -4    1.39    0.20
 -20   0  -4    1.57    0.22
 -20   0  -4    1.33    0.21
 -22   0  -4    3.79    0.33
 -22   0  -4    4.26    0.37
 -22   0  -4    4.27    0.38
 -27  -1   4    2.37    0.31
 -27  -1   4    2.98    0.31
 -27   1   4    2.19    0.33
  27   1  -4    1.91    0.24
 -25  -1   4    9.90    0.45
 -25  -1   4   10.43    0.45
  25  -1  -4    9.26    0.45
 -25  -1   4    9.22    0.42
  25   1  -4    8.93    0.46
 -25   1   4    9.37    0.45
 -25   1   4    9.23    0.42
 -25   1   4    8.76    0.43
 -23  -1   4    0.88    0.17
 -23  -1   4    0.73    0.16
  23  -1  -4    0.82    0.16
 -23   1   4    1.01    0.17
  23   1  -4    1.03    0.18
 -23   1   4    1.05    0.18
 -23   1   4    0.81    0.13
 -23   1   4    1.13    0.18
  21  -1  -4   25.28    0.76
 -21  -1   4   24.34    0.74
 -21  -1   4   24.87    0.75
  21   1  -4   24.89    0.76
 -21   1   4   25.99    0.76
 -21   1   4   24.98    0.72
 -21   1   4   25.26    0.74
 -21   1   4   25.70    0.77
  19  -1  -4   49.07    1.31
  19  -1  -4   50.32    1.31
 -19  -1   4   49.32    1.31
 -19  -1   4   48.36    1.31
  19   1  -4   45.69    2.67
  19   1  -4   48.72    1.32
 -19   1   4   48.58    1.31
 -19   1   4   48.61    1.32
 -19   1   4   47.62    1.30
  19   1  -4   45.37    1.86
 -19   1   4   49.03    1.28
 -19   1   4   48.64    1.25
 -17  -1   4   23.88    0.68
  17  -1  -4   23.55    0.65
  17  -1  -4   22.95    0.67
 -17  -1   4   24.49    0.68
 -17  -1   4   24.05    0.62
  17   1  -4   23.29    1.19
 -17   1   4   23.94    0.65
 -17   1   4   23.99    0.61
  17   1  -4   23.45    1.19
  17   1  -4   21.06    1.87
  17   1  -4   22.64    1.78
  17   1  -4   23.03    0.68
 -17   1   4   23.56    0.67
 -17   1   4   23.85    0.71
 -17   1   4   23.27    0.63
 -15  -1   4   44.14    1.11
 -15  -1   4   44.68    1.12
  15  -1  -4   43.78    1.16
 -15  -1   4   44.57    1.16
  15  -1  -4   44.03    1.14
  15   1  -4   40.93    1.58
 -15   1   4   43.40    1.15
  15   1  -4   43.22    1.17
 -15   1   4   44.17    1.12
  15   1  -4   42.89    1.60
 -15   1   4   43.41    1.17
 -15   1   4   43.81    1.13
  15   1  -4   42.51    2.14
  15   1  -4   44.01    2.12
 -15   1   4   43.73    1.14
 -13  -1   4   55.26    1.36
  13  -1  -4   51.90    1.39
  13  -1  -4   53.80    1.39
 -13  -1   4   53.40    1.36
 -13  -1   4   55.28    1.40
  13  -1  -4   53.68    1.39
 -13  -1   4   53.34    1.37
 -13   1   4   51.60    1.38
 -13   1   4   53.07    1.39
  13   1  -4   52.23    2.18
 -13   1   4   53.28    1.37
  13   1  -4   55.73    1.79
 -13   1   4   53.44    1.37
  13   1  -4   52.69    1.40
 -11  -1   4   43.12    1.05
 -11  -1   4   39.85    1.54
 -11  -1   4   41.64    1.09
  11  -1  -4   41.89    1.08
  11  -1  -4   41.27    1.08
 -11  -1   4   40.53    1.91
  11  -1  -4   40.91    1.08
 -11  -1   4   42.28    1.07
 -11  -1   4   41.95    1.06
 -11   1   4   41.11    1.07
 -11   1   4   41.61    1.07
  11   1  -4   41.98    1.09
 -11   1   4   40.91    1.07
  11   1  -4   42.51    1.75
  11   1  -4   40.22    1.09
  11   1  -4   42.89    1.42
 -11   1   4   41.38    1.08
  -9  -1   4   35.15    0.90
  -9  -1   4   33.05    1.51
  -9  -1   4   33.88    0.88
  -9  -1   4   34.71    0.90
   9  -1  -4   33.89    0.91
  -9  -1   4   33.74    0.91
   9  -1  -4   33.86    0.92
   9  -1  -4   34.22    0.91
  -9  -1   4   33.33    1.21
   9   1  -4   34.69    1.21
  -9   1   4   35.92    0.91
   9   1  -4   36.68    0.92
   9   1  -4   35.72    1.50
   9   1  -4   35.67    0.92
   9   1  -4   35.86    0.90
  -9   1   4   35.39    0.90
   9   1  -4   38.31    0.91
  -9   1   4   36.80    0.90
  -7  -1   4  363.73    8.97
  -7  -1   4  349.91    9.26
  -7   1   4  334.89    8.69
   7   1  -4  317.73    8.93
   7   1  -4  336.08    9.25
  -7   1   4  365.40    8.78
  -7   1   4  338.71    8.78
  -7   1   4  341.53    8.70
  -5  -1   4  154.67    4.22
   5  -1  -4  159.50    4.09
  -5  -1   4  155.38    3.89
   5  -1  -4  154.72    3.89
  -5  -1   4  159.44    3.90
   5  -1  -4  164.29    4.29
  -5  -1   4  150.60    4.50
   5   1  -4  147.29    4.47
   5   1  -4  150.60    4.20
  -5   1   4  149.25    4.07
   5   1  -4  151.85    3.89
  -5   1   4  152.37    4.26
   3  -1  -4   25.77    0.64
   3  -1  -4   24.60    0.91
   3  -1  -4   25.31    0.65
  -3  -1   4   24.32    0.98
  -3  -1   4   24.68    1.28
   3  -1  -4   23.85    0.65
  -3  -1   4   24.65    0.65
  -3  -1   4   24.78    0.65
   3  -1  -4   27.23    0.65
  -3  -1   4   25.02    0.65
   3  -1  -4   25.83    0.65
  -3  -1   4   25.78    0.64
   3  -1  -4   25.62    0.65
   3  -1  -4   25.89    0.63
   3  -1  -4   24.29    1.15
   3  -1  -4   25.46    0.64
  -3   1   4   22.86    0.63
   3   1  -4   24.22    0.65
  -3   1   4   28.39    0.67
   3   1  -4   25.55    1.25
  -3   1   4   24.58    0.65
  -3   1   4   25.94    0.64
   3   1  -4   25.66    0.64
   3   1  -4   23.10    0.64
  -3   1   4   25.06    0.92
   3   1  -4   23.62    0.65
  -3   1   4   23.46    0.64
  -3   1   4   24.29    1.15
  -3   1   4   24.61    0.64
   3   1  -4   25.00    0.98
   3   1  -4   24.28    0.65
  -3   1   4   23.68    0.65
   3   1  -4   24.34    0.64
  -3   1   4   26.08    0.65
   1  -1  -4    7.05    0.78
  -1  -1   4    8.41    0.22
   1  -1  -4    8.29    0.20
   1  -1  -4    7.94    0.22
   1  -1  -4    7.85    0.21
  -1  -1   4    7.97    0.22
   1  -1  -4    7.61    0.22
  -1  -1   4    7.75    0.89
   1  -1  -4    8.05    0.22
   1  -1  -4    8.10    0.19
   1  -1  -4    8.67    0.21
  -1  -1   4    7.48    0.56
   1  -1  -4    7.55    0.53
  -1  -1   4    7.90    0.21
  -1  -1   4    8.16    0.22
   1  -1  -4    8.30    0.22
   1   1  -4    6.86    0.21
  -1   1   4    6.77    0.21
  -1   1   4    6.05    0.50
   1   1  -4    7.19    0.21
  -1   1   4    5.85    0.78
   1   1  -4    7.12    0.21
   1   1  -4    6.89    0.21
  -1   1   4    6.88    0.21
  -1   1   4    6.97    0.21
   1   1  -4    6.41    0.80
  -1   1   4    7.35    0.21
  -1   1   4    6.88    0.21
   1   1  -4    5.97    0.49
   1   1  -4    6.59    0.22
   1   1  -4    6.80    0.22
   1  -1   4  607.82   15.42
   1  -1   4  619.89   15.89
  -1  -1  -4  545.83   15.39
  -1  -1  -4  591.14   15.87
  -1   1  -4  587.68   15.40
  -1   1  -4  633.61   15.90
   1   1   4  577.71   15.42
   1   1   4  595.14   15.88
   3  -1   4   26.47    1.21
  -3  -1  -4   26.58    0.71
   3  -1   4   27.09    0.69
  -3  -1  -4   27.01    0.71
   3  -1   4   26.96    1.67
  -3  -1  -4   26.52    0.71
  -3  -1  -4   26.60    0.69
  -3  -1  -4   24.76    1.17
   3  -1   4   27.32    0.69
   3  -1   4   27.27    0.70
  -3  -1  -4   27.68    0.69
  -3  -1  -4   24.93    1.57
  -3   1  -4   26.11    0.69
   3   1   4   26.72    0.71
  -3   1  -4   26.25    1.16
  -3   1  -4   26.51    0.71
  -3   1  -4   27.13    0.71
   3   1   4   28.39    1.80
   3   1   4   26.30    0.70
  -3   1  -4   26.39    0.71
  -3   1  -4   27.18    0.71
   3   1   4   26.01    1.25
  -3   1  -4   29.39    1.61
   3   1   4   26.26    0.69
  -3   1  -4   28.56    0.69
   3   1   4   27.10    0.69
   5  -1   4  123.58    3.87
  -5  -1  -4  136.31    4.53
   5  -1   4  127.22    3.24
  -5  -1  -4  125.94    3.26
  -5  -1  -4  140.72    3.96
   5  -1   4  125.42    3.25
   5  -1   4  123.23    3.25
  -5  -1  -4  125.58    3.27
   5  -1   4  124.64    4.44
  -5  -1  -4  127.56    3.24
  -5  -1  -4  119.10    3.27
   5   1   4  124.28    3.26
   5   1   4  134.70    3.25
  -5   1  -4  123.50    3.27
  -5   1  -4  126.94    3.25
  -5   1  -4  127.21    3.26
   5   1   4  122.94    3.26
  -5   1  -4  138.28    4.46
  -5   1  -4  120.86    3.26
   5   1   4  137.32    4.61
   5   1   4  141.07    3.99
  -5   1  -4  127.38    3.26
  -5   1  -4  137.94    3.91
  -7  -1  -4  113.88    2.89
   7  -1   4  109.53    2.87
  -7  -1  -4  109.40    2.88
   7  -1   4  108.15    2.88
  -7  -1  -4  112.55    2.90
   7  -1   4  120.69    3.65
   7  -1   4  113.41    2.86
  -7  -1  -4  112.67    2.90
  -7  -1  -4  115.53    4.34
  -7  -1  -4  119.74    3.68
   7  -1   4  119.70    4.34
  -7  -1  -4  113.14    2.86
   7   1   4  117.20    3.70
  -7   1  -4  115.60    2.88
   7   1   4  110.92    2.89
   7   1   4  111.71    2.86
   7   1   4  104.80    2.86
  -7   1  -4  125.99    4.30
  -7   1  -4  111.23    2.89
   7   1   4  115.60    2.87
  -7   1  -4  113.55    2.89
  -7   1  -4  123.93    3.62
  -7   1  -4  106.65    2.90
   7   1   4  113.92    4.42
   7   1   4  104.45    2.90
  -7   1  -4  112.74    2.90
  -9  -1  -4   25.89    0.74
  -9  -1  -4   27.44    0.69
  -9  -1  -4   26.48    0.73
  -9  -1  -4   26.74    0.74
   9  -1   4   27.34    0.70
   9  -1   4   25.74    0.71
  -9  -1  -4   26.29    0.73
  -9   1  -4   26.80    0.74
  -9   1  -4   29.26    2.00
   9   1   4   26.34    0.69
  -9   1  -4   26.68    1.38
  -9   1  -4   27.07    0.73
   9   1   4   23.39    2.49
  -9   1  -4   26.81    0.74
   9   1   4   25.77    0.73
  -9   1  -4   28.15    0.71
  -9   1  -4   25.98    0.74
   9   1   4   27.48    0.69
   9   1   4   26.55    0.69
   9   1   4   26.05    0.73
   9   1   4   27.60    1.62
  11  -1   4   50.41    3.09
  11  -1   4   56.13    1.46
  11  -1   4   55.97    1.47
 -11  -1  -4   58.58    1.50
 -11  -1  -4   57.18    1.50
  11  -1   4   56.20    2.38
 -11  -1  -4   56.81    1.51
 -11  -1  -4   57.15    1.51
  11   1   4   61.88    3.75
  11   1   4   57.26    2.55
  11   1   4   55.19    1.50
 -11   1  -4   58.76    1.50
  11   1   4   56.48    1.44
 -11   1  -4   58.84    1.51
  11   1   4   58.11    1.51
 -11   1  -4   60.15    1.48
 -11   1  -4   55.54    2.36
 -11   1  -4   58.01    1.51
 -11   1  -4   57.93    1.51
  11   1   4   55.16    2.47
  11   1   4   50.81    3.48
 -13  -1  -4   17.11    0.50
 -13  -1  -4   17.12    0.52
 -13  -1  -4   16.66    0.53
 -13  -1  -4   16.87    0.50
  13   1   4   15.85    0.51
  13   1   4   15.12    0.50
 -13   1  -4   15.83    0.51
 -13   1  -4   16.08    0.50
 -13   1  -4   16.41    0.47
 -13   1  -4   15.89    0.51
 -13   1  -4   16.27    0.52
 -15  -1  -4   17.27    0.54
 -15  -1  -4   17.81    0.55
 -15  -1  -4   17.27    0.57
 -15  -1  -4   16.91    0.55
 -15  -1  -4   17.30    0.55
 -15   1  -4   17.04    0.56
 -15   1  -4   16.82    0.53
 -15   1  -4   17.66    0.53
 -15   1  -4   17.37    0.56
 -15   1  -4   16.93    0.56
  15   1   4   17.65    0.56
 -17  -1  -4   13.89    0.50
 -17  -1  -4   14.05    0.51
 -17  -1  -4   14.71    0.48
 -17   1  -4   14.51    0.49
 -17   1  -4   13.98    0.50
 -17   1  -4   13.80    0.51
  17   1   4   14.32    0.50
 -17   1  -4   13.69    0.51
 -19  -1  -4    1.97    0.30
 -19  -1  -4    2.31    0.29
 -19  -1  -4    2.11    0.25
 -19  -1  -4    1.81    0.27
 -19  -1  -4    2.09    0.30
 -19   1  -4    2.16    0.29
 -19   1  -4    2.39    0.25
 -19   1  -4    2.21    0.30
 -19   1  -4    1.84    0.21
 -21  -1  -4   -0.32    0.16
 -21  -1  -4    0.14    0.18
 -21  -1  -4    0.19    0.19
 -21  -1  -4   -0.07    0.16
 -21   1  -4    0.05    0.19
 -21   1  -4    0.04    0.19
 -21   1  -4    0.02    0.17
 -26  -2   4    1.21    0.21
 -26  -2   4    1.51    0.24
 -26  -2   4    1.23    0.21
  26   2  -4    1.05    0.21
 -26   2   4    1.27    0.20
 -26   2   4    0.69    0.19
 -26   2   4    1.07    0.21
 -24  -2   4    0.18    0.16
 -24  -2   4    0.13    0.15
  24   2  -4    0.16    0.17
 -24   2   4    0.11    0.15
 -24   2   4    0.09    0.14
 -24   2   4    0.01    0.15
 -22  -2   4    0.36    0.15
  22   2  -4    0.19    0.15
 -22   2   4    0.26    0.14
 -22   2   4    0.27    0.14
 -22   2   4    0.37    0.12
 -22   2   4    0.32    0.12
  20  -2  -4   25.64    0.75
  20  -2  -4   26.97    0.72
 -20  -2   4   25.47    0.75
 -20  -2   4   25.81    0.76
 -20   2   4   24.70    0.76
  20   2  -4   25.41    0.76
 -20   2   4   25.65    0.74
 -20   2   4   25.06    0.75
 -20   2   4   24.62    0.70
 -20   2   4   25.35    0.69
 -20   2   4   24.87    0.72
  18  -2  -4    7.06    0.28
 -18  -2   4    7.17    0.31
  18  -2  -4    6.88    0.30
 -18  -2   4    7.37    0.22
 -18  -2   4    7.52    0.31
 -18   2   4    7.48    0.27
  18   2  -4    6.99    0.31
 -18   2   4    7.35    0.28
 -18   2   4    7.39    0.30
 -18   2   4    7.50    0.25
 -18   2   4    7.06    0.31
 -16  -2   4    6.31    0.26
  16  -2  -4    6.52    0.24
 -16  -2   4    6.35    0.26
 -16  -2   4    6.65    0.20
  16  -2  -4    6.33    0.25
 -16   2   4    6.46    0.19
  16   2  -4    6.24    0.27
 -16   2   4    6.35    0.24
 -16   2   4    6.07    0.27
  16   2  -4    6.38    1.37
  16   2  -4    6.66    0.91
 -16   2   4    6.12    0.21
  16   2  -4    7.82    1.33
  16   2  -4    6.38    0.91
 -16   2   4    6.19    0.23
 -16   2   4    6.09    0.25
 -14  -2   4   75.63    1.87
 -14  -2   4   75.05    1.92
 -14  -2   4   65.93    3.06
 -14  -2   4   66.92    2.47
  14  -2  -4   74.05    1.90
  14  -2  -4   72.91    1.91
 -14  -2   4   73.63    1.89
 -14   2   4   75.38    1.89
 -14   2   4   75.25    1.90
 -14   2   4   75.20    1.88
  14   2  -4   74.50    1.92
  14   2  -4   75.36    3.17
 -14   2   4   77.67    1.90
 -14   2   4   73.80    1.91
  14   2  -4   74.78    2.52
 -14   2   4   74.51    1.92
  12  -2  -4   42.80    1.15
 -12  -2   4   44.86    1.11
 -12  -2   4   43.65    1.13
  12  -2  -4   43.82    1.14
 -12  -2   4   42.96    1.67
  12  -2  -4   43.59    1.14
 -12  -2   4   44.94    1.12
 -12  -2   4   42.83    2.15
 -12  -2   4   44.05    1.16
  12   2  -4   45.07    1.16
  12   2  -4   43.59    1.14
 -12   2   4   44.21    1.13
 -12   2   4   43.94    1.13
  12   2  -4   44.07    1.11
  12   2  -4   43.11    1.66
 -12   2   4   43.28    1.13
  12   2  -4   42.62    2.20
 -12   2   4   43.44    1.14
 -12   2   4   43.47    1.15
 -12   2   4   44.02    1.15
 -10  -2   4   36.97    2.13
  10  -2  -4   44.71    1.17
 -10  -2   4   36.82    2.87
 -10  -2   4   46.95    1.19
 -10  -2   4   47.46    1.15
 -10  -2   4   46.89    1.17
 -10  -2   4   45.13    1.16
  10  -2  -4   45.07    1.18
  10  -2  -4   45.32    1.17
  10   2  -4   44.82    1.15
  10   2  -4   47.04    1.16
 -10   2   4   45.44    1.17
 -10   2   4   46.89    1.16
  10   2  -4   46.28    1.66
 -10   2   4   44.43    1.16
 -10   2   4   44.55    1.16
  10   2  -4   46.53    1.19
  10   2  -4   44.59    1.18
  10   2  -4   45.06    1.16
  10   2  -4   46.37    2.11
 -10   2   4   45.56    1.18
 -10   2   4   45.76    1.19
 -10   2   4   45.73    1.16
  -8  -2   4   24.33    0.64
   8  -2  -4   23.91    0.64
  -8  -2   4   22.48    1.08
  -8  -2   4   23.71    0.65
   8  -2  -4   24.54    0.65
   8  -2  -4   23.79    0.66
  -8  -2   4   22.61    1.50
  -8   2   4   24.83    0.64
   8   2  -4   25.28    0.63
  -8   2   4   24.18    0.76
   8   2  -4   23.20    1.05
  -8   2   4   23.24    0.91
  -8   2   4   25.43    0.65
   8   2  -4   24.20    1.45
  -8   2   4   24.83    0.76
   8   2  -4   24.78    0.64
  -8   2   4   25.17    0.64
   8   2  -4   25.06    0.66
   8   2  -4   24.63    0.66
  -8   2   4   25.53    0.63
   8   2  -4   24.94    0.66
  -8   2   4   25.27    0.64
  -8   2   4   25.70    0.64
  -8   2   4   24.45    0.66
  -8   2   4   23.84    0.89
  -6  -2   4   46.57    1.21
  -6  -2   4   48.62    1.20
   6  -2  -4   45.37    1.20
  -6  -2   4   41.66    1.99
   6  -2  -4   44.15    1.21
  -6  -2   4   46.08    1.20
  -6  -2   4   43.33    1.62
   6  -2  -4   49.85    1.20
  -6   2   4   44.35    1.19
  -6   2   4   46.76    1.65
  -6   2   4   46.89    1.20
  -6   2   4   47.93    1.19
  -6   2   4   49.60    1.19
  -6   2   4   46.73    1.19
   6   2  -4   48.40    1.65
   6   2  -4   45.07    1.21
  -6   2   4   46.67    1.20
  -6   2   4   49.94    1.19
   6   2  -4   46.89    1.21
   6   2  -4   47.62    1.21
   6   2  -4   44.94    1.19
  -6   2   4   45.66    1.21
   6   2  -4   46.97    1.19
  -6   2   4   48.77    1.44
  -6   2   4   47.13    1.67
  -6   2   4   47.90    1.43
   6   2  -4   49.21    2.06
   4  -2  -4   20.00    0.54
  -4  -2   4   20.18    0.97
  -4  -2   4   18.49    1.34
  -4  -2   4   19.77    0.54
   4  -2  -4   21.29    0.52
  -4  -2   4   20.99    0.53
   4  -2  -4   18.76    0.54
   4  -2  -4   20.86    0.53
   4  -2  -4   20.58    0.53
  -4  -2   4   20.32    0.54
   4   2  -4   20.69    1.30
  -4   2   4   19.50    1.10
   4   2  -4   20.95    0.95
  -4   2   4   20.36    0.51
  -4   2   4   19.65    0.53
  -4   2   4   21.29    0.52
   4   2  -4   20.25    0.54
   4   2  -4   20.51    0.54
   4   2  -4   19.96    0.54
  -4   2   4   19.87    0.52
  -4   2   4   18.73    0.82
  -4   2   4   21.28    0.52
  -4   2   4   19.91    0.84
  -4   2   4   20.49    0.53
  -4   2   4   21.28    0.53
   4   2  -4   20.03    0.53
  -4   2   4   19.17    1.09
   4   2  -4   19.77    0.54
  -4   2   4   20.20    0.55
  -2  -2   4   45.84    1.65
   2  -2  -4   52.12    1.20
   2  -2  -4   45.90    1.19
   2  -2  -4   46.42    1.19
   2  -2  -4   45.32    1.17
  -2  -2   4   45.97    1.18
  -2  -2   4   44.19    2.06
  -2  -2   4   46.56    1.19
   2  -2  -4   45.36    1.19
  -2  -2   4   45.62    1.19
   2  -2  -4   49.38    1.17
   2  -2  -4   47.26    1.17
  -2   2   4   44.63    1.20
  -2   2   4   49.04    1.61
   2   2  -4   45.53    1.18
  -2   2   4   48.43    1.97
   2   2  -4   45.39    2.03
  -2   2   4   44.62    1.19
  -2   2   4   45.51    1.17
   2   2  -4   45.12    1.19
  -2   2   4   46.37    1.18
  -2   2   4   46.81    1.56
  -2   2   4   46.85    1.17
   2   2  -4   44.92    1.63
   2   2  -4   44.43    1.19
   2   2  -4   45.29    1.19
  -2   2   4   47.86    1.91
   2   2  -4   45.66    1.19
   0  -2  -4   73.32    1.86
   0  -2  -4   74.92    1.84
   0  -2   4   74.64    1.86
   0  -2  -4   75.53    1.84
   0  -2  -4   71.99    1.86
   0  -2   4   73.34    1.86
   0  -2   4   81.93    2.94
   0  -2  -4   72.87    1.86
   0  -2   4   80.34    2.41
   0  -2   4   75.22    1.85
   0  -2  -4   72.70    1.85
   0   2  -4   72.44    1.86
   0   2   4   74.69    1.85
   0   2   4   68.15    1.87
   0   2  -4   70.29    1.85
   0   2   4   71.57    2.72
   0   2  -4   70.92    2.35
   0   2   4   77.10    2.84
   0   2   4   70.54    1.86
   0   2   4   70.05    1.84
   0   2   4   77.62    2.38
   0   2   4   70.87    1.85
   0   2   4   73.06    2.33
   0   2   4   69.18    1.86
   0   2  -4   68.98    1.86
   0   2  -4   70.97    1.86
   0   2  -4   69.73    2.76
  -2  -2  -4   18.64    0.49
  -2  -2  -4   19.46    0.48
   2  -2   4   17.76    0.49
  -2  -2  -4   18.65    0.49
   2  -2   4   19.18    0.47
   2  -2   4   17.98    0.48
  -2  -2  -4   18.78    0.48
   2  -2   4   17.81    0.49
   2  -2   4   16.95    0.99
   2  -2   4   17.47    1.51
  -2  -2  -4   18.02    0.49
  -2  -2  -4   18.30    0.48
   2   2   4   17.80    0.49
   2   2   4   17.90    1.42
   2   2   4   18.17    0.48
   2   2   4   18.32    0.48
  -2   2  -4   17.53    0.93
  -2   2  -4   17.63    0.47
  -2   2  -4   17.90    0.49
   2   2   4   18.48    0.99
  -2   2  -4   17.79    0.48
   2   2   4   17.22    0.49
   2   2   4   15.80    1.46
  -2   2  -4   18.28    1.37
  -2   2  -4   17.57    0.49
   2   2   4   18.08    0.48
   2   2   4   16.16    0.99
  -4  -2  -4   29.05    0.76
   4  -2   4   27.39    1.90
  -4  -2  -4   29.51    0.76
  -4  -2  -4   30.13    0.73
  -4  -2  -4   29.15    0.76
   4  -2   4   29.54    0.75
   4  -2   4   30.64    0.74
   4  -2   4   29.60    0.76
   4  -2   4   30.22    1.38
  -4   2  -4   28.06    0.75
  -4   2  -4   27.46    1.72
  -4   2  -4   25.63    1.25
   4   2   4   28.98    0.73
   4   2   4   27.85    0.75
   4   2   4   27.48    0.76
   4   2   4   24.98    1.97
  -4   2  -4   27.74    0.73
  -4   2  -4   28.12    0.76
   4   2   4   31.71    1.94
   4   2   4   27.35    0.76
   4   2   4   28.47    0.74
   4   2   4   27.64    1.40
  -4   2  -4   27.82    0.76
  -4   2  -4   27.24    0.76
   4   2   4   27.65    1.34
  -6  -2  -4   49.46    1.34
   6  -2   4   49.83    1.31
   6  -2   4   48.56    1.32
  -6  -2  -4   51.26    1.34
   6  -2   4   50.04    1.33
   6  -2   4   50.67    2.02
   6  -2   4   44.45    2.58
   6   2   4   51.27    2.89
   6   2   4   53.27    2.14
   6   2   4   50.84    1.35
   6   2   4   54.78    2.74
  -6   2  -4   50.55    1.36
  -6   2  -4   51.04    1.32
  -6   2  -4   55.52    2.57
   6   2   4   55.63    2.09
  -6   2  -4   48.33    1.35
  -6   2  -4   51.63    1.34
   6   2   4   51.39    1.33
  -6   2  -4   51.70    1.30
   6   2   4   51.56    1.30
  -6   2  -4   53.03    1.98
   6   2   4   53.66    1.30
  -8  -2  -4   31.60    0.86
   8  -2   4   31.10    0.84
   8  -2   4   30.63    0.84
  -8  -2  -4   31.69    0.85
  -8  -2  -4   31.78    0.86
   8  -2   4   31.34    0.81
  -8   2  -4   32.57    0.81
   8   2   4   32.03    0.85
   8   2   4   31.93    0.81
   8   2   4   30.13    1.77
  -8   2  -4   30.65    0.85
  -8   2  -4   31.18    2.01
   8   2   4   31.76    0.85
  -8   2  -4   31.99    0.86
   8   2   4   28.92    2.75
  -8   2  -4   31.65    0.84
  -8   2  -4   31.39    0.86
  -8   2  -4   30.64    1.48
   8   2   4   32.43    2.51
   8   2   4   32.07    1.67
 -10  -2  -4    9.15    0.33
 -10  -2  -4    9.21    0.33
  10  -2   4    9.12    1.04
 -10  -2  -4    9.54    0.32
 -10  -2  -4    9.21    0.30
  10  -2   4    8.67    1.58
  10  -2   4    9.88    0.29
 -10   2  -4    9.43    0.28
 -10   2  -4    9.09    0.33
  10   2   4    8.70    0.31
  10   2   4    8.94    1.46
  10   2   4    8.94    0.32
 -10   2  -4    9.43    1.53
  10   2   4    9.11    0.24
 -10   2  -4    9.10    0.33
  10   2   4    8.88    1.76
 -10   2  -4    9.44    1.03
 -10   2  -4    9.25    0.30
 -10   2  -4    8.98    0.32
  10   2   4    9.65    1.25
  10   2   4    8.76    1.95
 -12  -2  -4    6.83    0.28
 -12  -2  -4    6.49    0.29
 -12  -2  -4    6.66    0.27
  12  -2   4    6.87    0.25
 -12  -2  -4    6.49    0.29
  12  -2   4    6.71    0.23
  12   2   4    7.34    1.80
  12   2   4    7.02    0.27
 -12   2  -4    7.21    0.22
 -12   2  -4    6.69    0.29
  12   2   4    7.00    0.29
  12   2   4    6.85    1.30
 -12   2  -4    6.64    0.29
 -12   2  -4    6.97    0.25
 -12   2  -4    6.77    0.29
 -14  -2  -4    3.18    0.25
 -14  -2  -4    3.08    0.22
 -14  -2  -4    3.12    0.22
 -14  -2  -4    3.23    0.24
  14   2   4    3.50    0.22
 -14   2  -4    3.56    0.20
  14   2   4    3.49    0.23
 -14   2  -4    3.24    0.25
 -14   2  -4    3.64    0.25
 -14   2  -4    3.36    0.23
 -16  -2  -4    3.79    0.25
 -16  -2  -4    3.73    0.33
 -16  -2  -4    3.44    0.26
 -16   2  -4    2.45    0.30
  16   2   4    3.43    0.27
 -16   2  -4    3.46    0.26
 -16   2  -4    3.79    0.23
 -18  -2  -4    9.63    0.42
 -18  -2  -4    9.72    0.40
 -18  -2  -4    9.64    0.43
 -18  -2  -4    9.73    0.41
  18   2   4    9.72    0.42
 -18   2  -4    9.71    0.43
 -18   2  -4    9.63    0.42
 -18   2  -4    9.95    0.44
 -18   2  -4    9.82    0.38
 -20  -2  -4    2.74    0.34
 -20  -2  -4    2.71    0.29
 -20  -2  -4    2.30    0.34
 -20  -2  -4    2.51    0.31
 -20  -2  -4    2.24    0.33
 -20   2  -4    2.32    0.34
 -20   2  -4    2.96    0.34
  20   2   4    2.50    0.32
 -20   2  -4    3.05    0.33
 -22  -2  -4    2.00    0.29
 -25  -3   4    7.20    0.41
 -25  -3   4    7.72    0.44
 -25   3   4    7.76    0.37
 -25   3   4    7.92    0.43
 -25   3   4    8.06    0.43
  25   3  -4    8.14    0.44
 -23  -3   4   -0.13    0.14
 -23   3   4    0.09    0.13
 -23   3   4   -0.03    0.15
  23   3  -4    0.07    0.15
 -23   3   4    0.14    0.16
 -23   3   4    0.16    0.15
  21  -3  -4    6.10    0.30
 -21  -3   4    5.88    0.33
 -21  -3   4    5.52    0.38
 -21   3   4    6.33    0.29
  21   3  -4    6.39    0.33
 -21   3   4    6.19    0.33
 -21   3   4    5.89    0.29
  19  -3  -4   21.35    0.64
 -19  -3   4   20.58    0.66
 -19  -3   4   21.26    0.67
 -19   3   4   21.85    0.66
 -19   3   4   21.90    0.63
  19   3  -4   21.84    0.67
 -19   3   4   22.50    0.63
 -19   3   4   21.50    0.67
 -17  -3   4   28.52    0.83
 -17  -3   4   28.97    0.83
 -17  -3   4   28.98    0.80
  17  -3  -4   29.03    0.81
 -17   3   4   28.42    0.76
  17   3  -4   29.52    0.83
 -17   3   4   27.68    0.82
  17   3  -4   28.76    0.76
 -17   3   4   28.65    0.79
 -17   3   4   28.81    0.82
 -17   3   4   29.58    0.76
 -17   3   4   28.95    0.79
 -15  -3   4   68.17    1.79
  15  -3  -4   70.41    1.76
 -15  -3   4   70.38    1.80
 -15  -3   4   65.71    2.60
  15  -3  -4   66.14    1.78
 -15  -3   4   61.87    3.44
 -15   3   4   69.26    1.76
 -15   3   4   69.52    1.79
  15   3  -4   63.14    3.48
  15   3  -4   70.25    1.77
 -15   3   4   70.06    1.74
  15   3  -4   69.88    1.80
  15   3  -4   62.14    2.55
 -15   3   4   70.08    1.77
  15   3  -4   69.44    1.74
 -15   3   4   69.31    1.78
 -13  -3   4  102.68    4.19
  13  -3  -4  103.71    2.72
 -13  -3   4  103.57    2.70
 -13  -3   4  108.56    2.68
 -13  -3   4  100.74    3.44
 -13  -3   4  106.36    2.73
  13  -3  -4  108.62    2.70
 -13  -3   4  111.89    2.68
  13   3  -4  102.95    4.23
 -13   3   4  108.89    2.70
 -13   3   4  100.67    2.72
  13   3  -4  103.50    3.46
 -13   3   4  109.31    2.71
  13   3  -4  108.13    2.73
 -13   3   4  105.32    2.72
  13   3  -4  105.19    2.68
 -13   3   4  108.40    2.72
  13   3  -4  105.48    2.68
 -13   3   4  106.73    2.68
  11  -3  -4   17.08    0.47
 -11  -3   4   17.10    0.50
  11  -3  -4   18.02    0.51
 -11  -3   4   17.39    1.88
 -11  -3   4   16.84    0.48
 -11  -3   4   18.23    0.45
 -11  -3   4   17.67    1.17
 -11  -3   4   18.03    0.46
 -11   3   4   18.09    0.46
 -11   3   4   17.95    0.81
 -11   3   4   17.06    0.47
 -11   3   4   17.38    0.61
  11   3  -4   20.71    1.92
 -11   3   4   17.21    0.48
  11   3  -4   16.98    0.51
 -11   3   4   17.21    0.50
 -11   3   4   17.40    0.49
  11   3  -4   17.35    0.46
  11   3  -4   16.72    0.50
 -11   3   4   18.09    0.46
  11   3  -4   16.29    1.13
 -11   3   4   17.08    0.51
  11   3  -4   17.37    0.48
 -11   3   4   17.47    0.48
   9  -3  -4   16.57    0.70
   9  -3  -4   16.15    0.99
  -9  -3   4   15.23    0.45
  -9  -3   4   15.63    1.22
  -9  -3   4   15.93    0.44
   9  -3  -4   16.23    0.47
   9  -3  -4   15.72    0.44
  -9  -3   4   14.28    1.87
  -9  -3   4   14.20    0.48
   9   3  -4   16.94    0.45
  -9   3   4   16.08    0.70
  -9   3   4   16.67    0.45
  -9   3   4   15.57    0.49
  -9   3   4   15.74    1.01
   9   3  -4   17.07    0.43
  -9   3   4   16.24    0.45
   9   3  -4   16.99    1.03
   9   3  -4   14.69    1.52
  -9   3   4   17.64    0.42
  -9   3   4   16.53    0.45
  -9   3   4   16.98    0.43
  -9   3   4   17.27    0.45
   7  -3  -4  140.44    3.68
   7  -3  -4  137.65    4.02
  -7  -3   4  143.54    4.66
   7  -3  -4  129.83    3.34
  -7  -3   4  144.72    4.03
  -7  -3   4  129.25    3.33
  -7  -3   4  133.87    3.33
   7  -3  -4  129.38    3.32
  -7   3   4  127.10    3.32
  -7   3   4  138.84    4.04
  -7   3   4  131.38    3.31
  -7   3   4  128.42    3.33
  -7   3   4  124.44    3.32
   7   3  -4  123.09    3.91
   7   3  -4  128.29    3.34
   7   3  -4  127.65    3.31
   7   3  -4  127.14    4.47
   7   3  -4  127.18    3.34
  -7   3   4  129.71    3.33
   7   3  -4  126.59    3.32
  -7   3   4  139.63    3.68
  -7   3   4  124.88    3.34
   5  -3  -4   68.33    1.72
   5  -3  -4   68.25    1.74
   5  -3  -4   71.04    2.55
  -5  -3   4   67.54    1.75
  -5  -3   4   67.11    2.89
  -5  -3   4   63.27    2.31
   5  -3  -4   71.19    1.73
  -5  -3   4   69.94    1.74
   5  -3  -4   65.83    1.75
   5   3  -4   65.56    1.72
  -5   3   4   68.81    1.73
   5   3  -4   66.42    1.75
   5   3  -4   67.09    1.75
   5   3  -4   73.27    2.36
  -5   3   4   65.56    1.74
  -5   3   4   65.63    1.75
  -5   3   4   71.94    2.57
   5   3  -4   68.23    2.84
  -5   3   4   68.76    1.72
  -5   3   4   73.09    2.17
  -5   3   4   69.49    1.72
   5   3  -4   66.92    1.74
  -5   3   4   64.95    1.74
  -5   3   4   65.13    1.73
   5   3  -4   68.76    1.73
   3  -3  -4    3.14    0.11
   3  -3  -4    3.07    0.11
  -3  -3   4    3.10    0.13
   3  -3  -4    3.21    0.13
   3  -3  -4    3.24    0.13
  -3  -3   4    2.60    0.50
   3  -3  -4    3.47    0.11
  -3  -3   4    3.10    0.13
  -3  -3   4    2.32    0.89
   3   3  -4    2.34    0.43
  -3   3   4    2.67    0.51
   3   3  -4    3.04    0.14
   3   3  -4    3.08    0.81
   3   3  -4    3.25    0.13
  -3   3   4    3.19    0.10
  -3   3   4    3.14    0.14
   3   3  -4    3.40    0.12
  -3   3   4    3.14    0.11
  -3   3   4    3.03    0.13
  -3   3   4    3.52    0.12
  -3   3   4    3.21    0.69
  -3   3   4    3.30    0.12
   3   3  -4    2.95    0.14
   3   3  -4    3.15    0.13
  -1  -3   4   39.79    2.32
   1  -3  -4   41.34    1.09
   1  -3  -4   42.16    1.09
  -1  -3   4   44.90    1.08
   1  -3  -4   43.64    1.08
   1  -3  -4   42.15    1.10
  -1  -3   4   43.34    1.10
   1  -3  -4   43.23    1.07
   1  -3  -4   41.79    1.07
  -1  -3   4   41.20    1.71
   1  -3  -4   44.58    1.08
  -1  -3   4   43.10    1.10
   1   3  -4   42.02    1.08
  -1   3   4   42.66    1.07
  -1   3   4   41.55    2.13
  -1   3   4   41.07    2.04
  -1   3   4   41.07    1.10
   1   3  -4   43.89    2.20
  -1   3   4   40.52    1.07
  -1   3   4   42.17    1.09
   1   3  -4   41.54    1.10
  -1   3   4   41.87    1.61
  -1   3   4   40.00    1.61
   1   3  -4   45.87    1.71
   1   3  -4   41.64    1.10
  -1   3   4   42.32    1.10
   1   3  -4   40.29    1.09
  -1   3   4   41.34    1.08
   1   3  -4   41.03    1.10
  -1  -3  -4   36.01    0.98
   1  -3   4   38.21    0.99
  -1  -3  -4   36.67    0.99
  -1  -3  -4   37.08    0.99
   1  -3   4   36.35    2.20
   1  -3   4   37.39    0.99
  -1  -3  -4   37.10    0.97
   1  -3   4   38.38    1.00
  -1  -3  -4   37.91    0.98
   1  -3   4   38.45    0.96
   1  -3   4   37.93    1.62
   1   3   4   39.05    1.00
   1   3   4   40.05    1.62
  -1   3  -4   37.68    0.96
   1   3   4   39.60    0.98
   1   3   4   35.15    1.57
  -1   3  -4   38.58    0.99
  -1   3  -4   39.12    2.11
   1   3   4   38.42    0.99
  -1   3  -4   37.17    1.57
   1   3   4   38.11    0.97
   1   3   4   41.90    2.19
  -1   3  -4   38.34    1.00
  -1   3  -4   37.27    0.99
   1   3   4   38.59    0.99
   1   3   4   34.93    2.12
   3  -3   4   10.36    0.97
   3  -3   4   10.87    0.32
  -3  -3  -4   10.44    0.32
   3  -3   4    9.31    1.37
  -3  -3  -4   11.05    0.30
  -3  -3  -4   10.76    0.32
   3  -3   4    9.93    0.31
   3  -3   4   10.81    0.30
  -3  -3  -4   10.88    0.29
   3   3   4   10.52    0.30
   3   3   4   10.31    0.29
   3   3   4    8.94    0.96
   3   3   4   10.13    1.49
  -3   3  -4   10.73    0.27
   3   3   4    9.26    0.88
  -3   3  -4   10.00    0.32
  -3   3  -4    9.22    1.26
  -3   3  -4    9.95    0.31
   3   3   4   10.57    0.32
  -3   3  -4   10.23    0.31
   3   3   4   10.23    0.31
   3   3   4   10.69    1.76
  -3   3  -4   10.53    0.83
  -5  -3  -4   76.32    1.99
   5  -3   4   73.22    2.73
  -5  -3  -4   75.36    2.00
   5  -3   4   76.86    1.98
  -5  -3  -4   74.42    2.00
  -5  -3  -4   75.51    1.97
   5  -3   4   76.15    2.00
   5  -3   4   72.19    3.45
   5   3   4   78.00    2.00
   5   3   4   79.92    1.97
  -5   3  -4   76.93    1.98
   5   3   4   84.88    3.61
   5   3   4   84.99    3.80
  -5   3  -4   78.28    2.00
  -5   3  -4   76.42    2.00
   5   3   4   76.33    1.98
   5   3   4   76.06    2.00
  -5   3  -4   80.41    2.01
  -5   3  -4   76.72    2.00
   5   3   4   79.12    2.80
  -5   3  -4   77.25    3.34
   5   3   4   84.07    2.91
   5   3   4   77.27    1.97
  -5   3  -4   78.23    2.71
   7  -3   4   51.34    3.17
   7  -3   4   52.55    1.35
   7  -3   4   52.75    1.37
  -7  -3  -4   50.59    1.38
  -7  -3  -4   52.21    1.38
   7  -3   4   49.62    2.26
   7   3   4   52.64    1.38
  -7   3  -4   52.28    1.32
   7   3   4   51.09    3.11
  -7   3  -4   54.52    2.81
   7   3   4   54.07    1.34
   7   3   4   48.08    3.40
  -7   3  -4   53.86    2.12
   7   3   4   49.15    2.34
   7   3   4   56.98    1.44
   7   3   4   52.84    1.38
  -7   3  -4   51.24    1.38
  -7   3  -4   52.28    1.38
  -7   3  -4   53.15    1.38
  -7   3  -4   52.10    1.35
   7   3   4   52.43    2.26
  -7   3  -4   53.92    1.39
   9  -3   4    1.16    1.15
   9  -3   4    0.52    0.53
   9  -3   4    0.65    0.09
  -9  -3  -4    0.64    0.11
   9  -3   4    0.71    0.09
   9  -3   4    0.74    0.07
  -9  -3  -4    0.48    0.09
  -9  -3  -4    0.64    0.10
   9   3   4    0.65    1.75
   9   3   4    0.79    0.05
   9   3   4    0.45    0.66
   9   3   4    0.60    0.09
  -9   3  -4    0.65    0.04
   9   3   4    0.78    0.73
  -9   3  -4    0.65    0.12
  -9   3  -4   -0.02    0.41
  -9   3  -4    0.73    0.11
  -9   3  -4    0.59    0.97
  -9   3  -4    0.66    0.10
  -9   3  -4    0.78    0.09
   9   3   4    2.35    1.49
   9   3   4    0.62    0.09
 -11  -3  -4    6.06    0.27
 -11  -3  -4    5.98    0.28
  11  -3   4    6.33    0.25
 -11  -3  -4    5.95    0.28
  11  -3   4    6.09    0.25
  11   3   4    6.23    0.27
  11   3   4    6.62    0.27
 -11   3  -4    6.52    0.29
  11   3   4    6.09    2.13
  11   3   4    7.28    1.22
 -11   3  -4    6.39    0.23
 -11   3  -4    6.48    0.27
 -11   3  -4    6.36    0.28
 -13  -3  -4   11.05    0.41
 -13  -3  -4   11.20    0.39
 -13  -3  -4   11.51    0.41
 -13  -3  -4   11.38    0.41
  13  -3   4   11.83    0.37
 -13   3  -4   11.48    0.42
 -13   3  -4   11.33    0.41
  13   3   4   11.25    0.40
  13   3   4   10.87    0.39
 -13   3  -4   11.18    0.41
 -13   3  -4   11.48    0.36
 -15  -3  -4    8.43    0.35
 -15  -3  -4    8.22    0.37
 -15  -3  -4    8.40    0.35
 -15   3  -4    7.94    0.38
 -15   3  -4    7.84    0.30
  15   3   4    8.19    0.34
  15   3   4    8.07    0.35
 -15   3  -4    8.01    0.36
 -17  -3  -4    8.17    0.41
 -17  -3  -4    7.80    0.39
 -17  -3  -4    8.42    0.38
 -17   3  -4    9.58    0.40
 -17   3  -4    8.52    0.39
  17   3   4    8.72    0.39
 -17   3  -4    8.46    0.41
  17   3   4    9.09    0.38
 -17   3  -4    7.91    0.41
 -19  -3  -4    9.96    0.45
 -19  -3  -4   10.46    0.48
 -19  -3  -4   10.21    0.46
 -19  -3  -4   10.59    0.45
 -19   3  -4    9.75    0.45
 -19   3  -4   10.57    0.48
 -19   3  -4   10.38    0.46
 -19   3  -4    9.67    0.48
  19   3   4   10.24    0.46
 -21  -3  -4    0.62    0.21
 -21  -3  -4    0.61    0.18
 -21  -3  -4    0.72    0.20
  21   3   4    0.26    0.18
 -21   3  -4    0.43    0.18
 -24  -4   4    2.65    0.35
 -24  -4   4    2.40    0.33
 -24   4   4    2.86    0.35
 -24   4   4    2.07    0.23
 -24   4   4    2.03    0.32
 -24   4   4    3.29    0.29
  24   4  -4    2.48    0.34
 -22  -4   4    2.86    0.32
 -22  -4   4    2.78    0.31
 -22   4   4    2.99    0.28
 -22   4   4    3.09    0.23
  22   4  -4    2.72    0.30
 -22   4   4    2.78    0.37
 -22   4   4    2.73    0.29
 -20  -4   4   42.56    1.21
  20  -4  -4   43.27    1.19
 -20  -4   4   42.17    1.20
 -20   4   4   43.08    1.16
 -20   4   4   43.08    1.21
 -20   4   4   42.59    1.16
 -20   4   4   42.09    1.17
  20   4  -4   43.16    1.21
 -20   4   4   43.37    1.35
  18  -4  -4   16.84    0.54
 -18  -4   4   16.92    0.55
 -18  -4   4   17.23    0.51
 -18  -4   4   16.59    0.55
 -18   4   4   16.89    0.54
 -18   4   4   16.42    0.50
  18   4  -4   16.94    0.55
 -18   4   4   16.75    0.50
 -18   4   4   16.32    0.55
 -18   4   4   16.36    0.51
 -16  -4   4   15.50    0.50
 -16  -4   4   15.30    0.50
 -16  -4   4   15.35    0.46
  16  -4  -4   15.98    0.50
 -16  -4   4   15.84    0.43
 -16   4   4   15.40    0.49
 -16   4   4   15.08    0.47
 -16   4   4   15.82    0.50
  16   4  -4   14.91    0.50
 -16   4   4   15.00    0.51
 -16   4   4   15.33    0.47
  16   4  -4   15.26    0.48
  16   4  -4   15.70    0.43
 -16   4   4   16.27    0.47
 -14  -4   4   12.45    1.51
 -14  -4   4   14.07    0.47
 -14  -4   4   14.59    0.44
  14  -4  -4   13.73    0.46
 -14  -4   4   14.61    0.42
  14  -4  -4   14.15    0.41
 -14   4   4   15.91    0.74
  14   4  -4   15.75    2.73
  14   4  -4   11.75    1.38
  14   4  -4   14.54    0.41
 -14   4   4   14.42    0.44
 -14   4   4   14.66    0.48
 -14   4   4   14.81    0.45
 -14   4   4   15.00    0.41
  14   4  -4   14.77    0.44
 -14   4   4   15.88    0.52
 -14   4   4   14.89    0.44
 -14   4   4   14.44    0.46
  14   4  -4   15.27    0.48
  12  -4  -4   31.03    1.13
 -12  -4   4   29.99    0.80
 -12  -4   4   30.21    0.78
 -12  -4   4   30.22    0.81
 -12  -4   4   29.50    1.77
  12  -4  -4   31.68    1.57
 -12  -4   4   28.88    2.83
  12  -4  -4   29.83    0.78
  12  -4  -4   30.05    0.83
 -12  -4   4   29.71    0.83
 -12   4   4   29.31    0.80
 -12   4   4   29.70    0.77
 -12   4   4   29.32    0.81
  12   4  -4   34.98    2.88
 -12   4   4   30.52    0.81
  12   4  -4   29.90    0.81
  12   4  -4   28.45    0.83
  12   4  -4   28.93    0.82
 -12   4   4   26.91    1.23
  12   4  -4   32.63    1.79
 -12   4   4   29.72    0.82
 -12   4   4   28.91    1.63
 -12   4   4   28.02    0.83
  12   4  -4   29.64    0.78
 -10  -4   4   22.35    0.64
 -10  -4   4   26.05    2.53
 -10  -4   4   22.50    0.60
  10  -4  -4   23.00    0.65
 -10  -4   4   22.83    0.63
 -10  -4   4   21.86    1.51
  10  -4  -4   22.45    1.46
 -10  -4   4   22.88    0.62
  10  -4  -4   22.47    0.60
  10  -4  -4   22.85    1.02
 -10   4   4   21.42    0.65
  10   4  -4   20.76    2.21
  10   4  -4   22.74    0.64
 -10   4   4   21.85    0.99
 -10   4   4   22.56    0.62
  10   4  -4   23.20    0.60
 -10   4   4   22.87    0.58
 -10   4   4   22.20    0.64
 -10   4   4   23.79    1.46
 -10   4   4   22.73    0.63
  10   4  -4   22.15    0.63
  10   4  -4   23.10    1.42
  10   4  -4   22.55    0.64
  -8  -4   4   36.61    0.97
  -8  -4   4   35.79    1.78
  -8  -4   4   35.21    2.58
   8  -4  -4   36.33    1.88
  -8  -4   4   37.92    0.97
   8  -4  -4   35.96    0.98
  -8  -4   4   35.73    0.97
   8  -4  -4   37.40    0.95
   8  -4  -4   40.07    1.45
  -8  -4   4   36.75    0.95
  -8   4   4   33.11    0.97
  -8   4   4   37.19    0.96
   8   4  -4   36.35    0.97
   8   4  -4   35.52    0.97
  -8   4   4   34.98    0.96
   8   4  -4   35.34    0.96
   8   4  -4   34.38    2.39
  -8   4   4   34.21    0.98
  -8   4   4   39.92    1.98
   8   4  -4   35.44    1.70
   8   4  -4   36.28    0.95
  -8   4   4   37.60    0.96
  -8   4   4   37.99    1.45
   6  -4  -4  119.10    4.02
  -6  -4   4  116.48    2.97
   6  -4  -4  116.42    2.95
   6  -4  -4  117.09    2.98
  -6  -4   4  113.42    2.97
  -6  -4   4  115.31    2.96
   6  -4  -4  116.28    3.48
  -6  -4   4  115.34    2.97
  -6  -4   4  125.00    4.63
  -6  -4   4  130.85    3.87
   6   4  -4  112.84    2.95
  -6   4   4  113.74    2.96
   6   4  -4  111.19    2.97
  -6   4   4  123.77    3.52
   6   4  -4  111.94    2.93
   6   4  -4  112.94    2.96
  -6   4   4  110.07    2.98
  -6   4   4  113.62    2.99
   6   4  -4  112.95    3.74
   6   4  -4  113.78    4.42
  -6   4   4  130.53    4.11
  -6   4   4  116.58    2.94
  -6   4   4  118.12    2.93
   6   4  -4  108.60    2.97
  -6   4   4  119.37    2.96
   4  -4  -4   41.16    1.62
  -4  -4   4   41.74    1.09
   4  -4  -4   39.75    1.09
   4  -4  -4   40.38    1.07
  -4  -4   4   37.69    2.58
   4  -4  -4   39.59    2.11
  -4  -4   4   39.55    1.83
   4  -4  -4   40.97    1.05
  -4  -4   4   41.61    1.07
   4   4  -4   38.95    1.77
  -4   4   4   42.95    1.05
   4   4  -4   41.07    2.52
   4   4  -4   40.98    1.07
  -4   4   4   40.60    2.19
   4   4  -4   40.84    1.05
  -4   4   4   41.95    1.07
   4   4  -4   41.54    1.07
  -4   4   4   39.71    1.08
  -4   4   4   42.52    1.66
  -4   4   4   41.75    1.06
  -4   4   4   41.84    1.05
   2  -4  -4   61.56    1.55
   2  -4  -4   63.69    1.60
   2  -4  -4   60.41    2.90
  -2  -4   4   62.22    1.60
  -2  -4   4   62.29    3.17
  -2  -4   4   63.26    1.61
   2  -4  -4   62.51    1.58
  -2  -4   4   56.75    1.68
  -2  -4   4   63.42    2.40
   2  -4  -4   62.56    1.59
   2  -4  -4   61.87    2.25
  -2   4   4   63.10    1.58
  -2   4   4   61.18    2.21
   2   4  -4   60.93    1.59
  -2   4   4   59.53    1.61
  -2   4   4   64.66    1.58
   2   4  -4   60.84    2.32
  -2   4   4   60.71    2.77
  -2   4   4   61.67    1.59
   2   4  -4   60.32    1.66
   2   4  -4   60.75    2.97
   2   4  -4   62.18    1.59
   2   4  -4   61.38    1.59
   0  -4   4  102.35    4.25
   0  -4   4  103.50    2.70
   0  -4  -4  102.88    2.70
   0  -4   4  102.51    2.72
   0  -4  -4  103.09    2.70
   0  -4   4  106.23    2.68
   0  -4   4  103.97    3.50
   0  -4  -4  104.10    2.70
   0  -4   4  103.21    2.71
   0  -4  -4  102.28    2.68
   0   4  -4  105.49    2.70
   0   4  -4  107.66    2.73
   0   4   4   99.87    2.71
   0   4   4  101.41    2.71
   0   4   4  104.72    2.68
   0   4   4  112.60    4.16
   0   4  -4  115.39    3.53
   0   4  -4  118.88    4.28
   0   4   4  115.62    3.50
   0   4   4  109.63    2.69
   0   4  -4  105.94    2.72
   2  -4   4   77.45    3.62
  -2  -4  -4   67.96    1.80
  -2  -4  -4   68.33    1.81
   2  -4   4   68.42    1.82
  -2  -4  -4   69.26    1.81
  -2  -4  -4   71.23    1.79
   2  -4   4   71.45    1.77
   2  -4   4   69.71    1.81
   2  -4   4   68.20    1.83
   2  -4   4   72.96    2.69
   2   4   4   71.14    1.80
   2   4   4   71.10    1.83
   2   4   4   62.92    2.57
   2   4   4   68.96    1.82
   2   4   4   69.34    1.79
  -2   4  -4   68.43    1.82
   2   4   4   71.62    3.37
  -2   4  -4   70.26    1.81
   2   4   4   76.08    2.69
   2   4   4   64.84    3.38
   2   4   4   69.67    1.82
  -2   4  -4   73.60    2.60
  -2   4  -4   71.09    1.82
  -2   4  -4   77.08    3.37
  -4  -4  -4   56.32    1.46
   4  -4   4   55.80    2.36
   4  -4   4   56.77    1.50
   4  -4   4   56.12    1.49
  -4  -4  -4   56.29    1.49
  -4  -4  -4   57.14    1.47
   4  -4   4   56.85    3.27
  -4  -4  -4   56.05    1.49
   4  -4   4   56.70    1.47
  -4   4  -4   56.29    1.49
  -4   4  -4   57.30    1.49
   4   4   4   56.06    2.37
   4   4   4   57.44    1.47
   4   4   4   56.27    1.47
  -4   4  -4   59.88    2.28
  -4   4  -4   57.84    1.48
   4   4   4   59.77    2.45
   4   4   4   53.67    3.18
   4   4   4   56.75    3.41
   4   4   4   57.63    1.46
  -4   4  -4   59.08    2.97
   4   4   4   56.61    1.49
   4   4   4   57.18    1.49
   6  -4   4   63.62    2.61
   6  -4   4   70.01    3.60
   6  -4   4   66.16    1.67
   6  -4   4   64.21    1.70
   6  -4   4   64.01    1.69
  -6  -4  -4   62.66    1.66
  -6  -4  -4   65.08    1.70
  -6  -4  -4   65.90    1.68
  -6  -4  -4   64.04    1.70
   6   4   4   63.21    1.70
   6   4   4   61.23    4.43
   6   4   4   63.03    2.77
   6   4   4   65.54    1.68
   6   4   4   69.26    4.02
  -6   4  -4   66.61    1.69
  -6   4  -4   65.10    1.70
   6   4   4   62.99    1.69
  -6   4  -4   64.74    3.26
  -6   4  -4   66.58    1.70
   6   4   4   65.51    3.36
  -6   4  -4   63.12    2.49
   6   4   4   66.46    1.66
   8  -4   4   21.56    0.63
  -8  -4  -4   21.23    0.64
  -8  -4  -4   22.17    0.65
   8  -4   4   22.42    0.60
   8  -4   4   22.12    0.64
  -8  -4  -4   22.46    0.63
   8   4   4   22.27    0.62
   8   4   4   21.84    0.63
   8   4   4   22.84    0.58
  -8   4  -4   22.10    0.64
   8   4   4   22.94    1.79
  -8   4  -4   22.04    1.47
   8   4   4   23.12    3.49
   8   4   4   21.14    0.64
  -8   4  -4   24.33    2.45
   8   4   4   23.98    1.96
  -8   4  -4   22.31    0.63
  -8   4  -4   21.92    0.64
   8   4   4   22.07    3.09
  -8   4  -4   21.82    0.65
 -10  -4  -4    4.90    0.26
 -10  -4  -4    5.00    0.25
 -10  -4  -4    4.92    0.26
  10  -4   4    5.17    0.17
  10  -4   4    5.17    0.25
  10  -4   4    5.00    0.24
  10   4   4    5.09    0.24
  10   4   4    5.09    0.26
  10   4   4    5.06    0.23
 -10   4  -4    5.16    0.18
  10   4   4    5.47    1.16
 -10   4  -4    5.28    0.24
 -10   4  -4    5.20    0.26
 -10   4  -4    5.25    0.25
  10   4   4    2.98    2.16
 -10   4  -4    4.94    0.27
  12  -4   4   23.12    0.71
 -12  -4  -4   24.48    0.72
 -12  -4  -4   24.28    0.73
 -12  -4  -4   24.26    0.73
  12   4   4   25.17    0.72
 -12   4  -4   24.53    0.74
 -12   4  -4   25.32    0.74
  12   4   4   25.36    0.72
 -12   4  -4   23.98    0.73
 -12   4  -4   25.00    0.72
 -14  -4  -4    2.46    0.36
 -14  -4  -4    2.52    0.35
  14  -4   4    2.22    0.24
 -14  -4  -4    2.76    0.26
  14   4   4    2.43    0.23
 -14   4  -4    2.56    0.27
  14   4   4    2.59    0.23
 -14   4  -4    2.99    0.24
 -16  -4  -4   21.74    0.70
 -16  -4  -4   21.57    0.69
 -16  -4  -4   20.77    0.70
 -16  -4  -4   20.91    0.67
  16   4   4   21.84    0.67
  16   4   4   21.98    0.68
 -16   4  -4   21.07    0.69
 -16   4  -4   21.39    0.71
 -16   4  -4   21.54    0.71
 -16   4  -4   22.06    0.68
 -18  -4  -4    6.61    0.41
 -18  -4  -4    6.48    0.39
 -18  -4  -4    6.89    0.40
 -18   4  -4    7.24    0.38
 -18   4  -4    7.26    0.43
 -18   4  -4    7.59    0.40
  18   4   4    6.84    0.38
  18   4   4    7.59    0.38
 -18   4  -4    6.73    0.42
 -20  -4  -4    0.54    0.19
 -20  -4  -4    0.40    0.23
 -20  -4  -4    0.07    0.17
 -20   4  -4    0.22    0.17
 -20   4  -4    0.80    0.24
  20   4   4    0.77    0.19
 -20   4  -4    0.80    0.19
 -23  -5   4    0.12    0.19
 -23  -5   4    0.12    0.17
 -23   5   4    0.25    0.19
  23   5  -4    0.06    0.17
 -23   5   4    0.13    0.18
 -23   5   4    0.19    0.17
 -21  -5   4    4.47    0.34
 -21  -5   4    4.40    0.33
  21  -5  -4    4.57    0.35
 -21   5   4    4.39    0.32
 -21   5   4    3.82    0.34
 -21   5   4    4.99    0.27
 -21   5   4    3.99    0.29
 -21   5   4    3.79    0.32
  21   5  -4    3.89    0.33
 -19  -5   4    8.49    0.39
 -19  -5   4    8.70    0.31
  19  -5  -4    8.86    0.38
 -19  -5   4    8.51    0.39
 -19   5   4    7.56    0.34
 -19   5   4    7.08    0.48
 -19   5   4    8.26    0.39
 -19   5   4    8.02    0.37
  19   5  -4    8.02    0.38
 -19   5   4    7.99    0.37
 -17  -5   4    1.15    0.15
 -17  -5   4    1.38    0.17
 -17  -5   4    1.18    0.15
  17  -5  -4    1.26    0.16
 -17   5   4    1.51    0.21
  17   5  -4    1.64    0.16
 -17   5   4    1.56    0.21
 -17   5   4    1.52    0.19
  17   5  -4    1.26    0.15
 -17   5   4    1.57    0.24
 -17   5   4    1.29    0.18
 -15  -5   4    4.69    0.27
 -15  -5   4    4.53    0.27
  15  -5  -4    5.14    0.27
 -15  -5   4    4.73    0.23
 -15   5   4    5.26    0.82
  15   5  -4    5.47    0.21
 -15   5   4    5.20    0.25
  15   5  -4    5.29    0.26
 -15   5   4    5.42    0.26
 -15   5   4    5.28    0.24
 -15   5   4    5.25    0.61
  15   5  -4    5.01    0.28
 -15   5   4    5.17    0.29
 -15   5   4    5.43    0.24
 -13  -5   4   27.87    0.82
  13  -5  -4   30.01    1.36
  13  -5  -4   28.78    0.76
 -13  -5   4   26.57    3.56
 -13  -5   4   26.07    2.05
 -13  -5   4   29.24    0.80
 -13  -5   4   28.66    0.79
  13  -5  -4   29.14    2.09
  13  -5  -4   29.14    0.83
 -13   5   4   30.17    1.90
 -13   5   4   29.54    0.80
  13   5  -4   25.28    3.26
 -13   5   4   28.91    1.27
  13   5  -4   29.71    0.83
 -13   5   4   28.82    0.80
  13   5  -4   29.77    0.81
 -13   5   4   31.11    0.82
 -13   5   4   28.01    0.83
  13   5  -4   29.45    0.83
  13   5  -4   27.08    1.95
 -13   5   4   28.87    0.82
 -11  -5   4    8.12    0.31
 -11  -5   4    5.45    2.10
 -11  -5   4    8.62    0.30
  11  -5  -4    8.92    0.89
  11  -5  -4    8.32    0.32
 -11  -5   4    8.38    0.25
  11  -5  -4    8.47    0.24
  11  -5  -4    8.56    1.27
 -11  -5   4    8.17    0.28
 -11  -5   4    7.87    1.53
  11   5  -4    6.92    1.89
  11   5  -4    7.82    0.29
  11   5  -4    7.67    0.31
 -11   5   4    8.74    0.88
  11   5  -4    8.18    0.27
 -11   5   4    7.55    0.32
 -11   5   4    8.18    0.29
 -11   5   4    6.72    1.16
 -11   5   4    8.13    0.29
  11   5  -4    7.85    0.31
 -11   5   4    7.97    0.29
 -11   5   4    8.31    0.30
  11   5  -4    7.00    1.35
  -9  -5   4   36.46    0.96
  -9  -5   4   36.00    0.99
   9  -5  -4   35.51    2.30
   9  -5  -4   37.08    1.01
  -9  -5   4   34.12    3.14
  -9  -5   4   37.00    0.98
  -9  -5   4   36.26    0.99
  -9  -5   4   33.71    2.05
   9  -5  -4   37.81    0.95
   9  -5  -4   36.91    1.60
   9   5  -4   35.21    0.99
   9   5  -4   37.96    0.96
  -9   5   4   36.17    0.98
  -9   5   4   36.42    0.98
  -9   5   4   36.90    1.01
  -9   5   4   40.33    2.39
   9   5  -4   35.11    3.03
  -9   5   4   36.85    1.61
   9   5  -4   36.51    0.98
  -9   5   4   36.82    0.98
   9   5  -4   36.65    1.00
   9   5  -4   34.88    1.97
   7  -5  -4   85.18    2.21
  -7  -5   4   85.17    2.19
   7  -5  -4   86.26    2.86
  -7  -5   4   90.63    3.28
  -7  -5   4   84.65    2.18
  -7  -5   4   80.43    4.28
   7  -5  -4   85.55    2.16
  -7  -5   4   87.37    2.20
  -7  -5   4   86.04    2.19
   7  -5  -4   91.00    3.60
  -7   5   4   86.84    3.59
   7   5  -4   80.85    2.17
   7   5  -4   85.93    2.19
  -7   5   4   84.17    2.19
  -7   5   4   80.89    2.18
  -7   5   4   88.19    2.89
   7   5  -4   83.85    2.15
   7   5  -4   85.12    2.20
  -7   5   4   83.64    2.18
  -7   5   4   84.94    2.17
   7   5  -4   81.07    4.08
   7   5  -4   81.25    2.20
   7   5  -4   84.52    3.17
  -7   5   4   83.11    2.20
   5  -5  -4   23.00    0.58
   5  -5  -4   22.06    0.64
   5  -5  -4   23.34    1.29
  -5  -5   4   20.71    1.58
  -5  -5   4   20.11    2.64
  -5  -5   4   23.25    0.62
  -5  -5   4   22.79    0.64
   5  -5  -4   23.40    0.61
   5  -5  -4   22.68    1.99
  -5  -5   4   23.58    0.63
   5   5  -4   22.23    0.64
   5   5  -4   21.93    0.59
  -5   5   4   22.05    0.61
  -5   5   4   21.60    0.64
   5   5  -4   21.63    2.31
  -5   5   4   22.20    0.62
   5   5  -4   21.43    1.51
  -5   5   4   22.25    2.04
  -5   5   4   21.89    0.62
   5   5  -4   21.77    0.62
   5   5  -4   22.06    0.63
   5   5  -4   20.57    0.67
  -5   5   4   22.51    0.59
  -5   5   4   22.52    0.58
  -5   5   4   22.18    1.31
  -3  -5   4   74.62    1.95
   3  -5  -4   73.23    2.74
  -3  -5   4   74.14    1.97
   3  -5  -4   77.43    3.59
  -3  -5   4   73.56    2.95
  -3  -5   4   77.87    3.96
  -3  -5   4   74.60    1.96
   3  -5  -4   73.87    1.96
   3  -5  -4   74.00    1.94
   3  -5  -4   73.38    1.92
   3   5  -4   81.25    2.94
   3   5  -4   75.62    1.95
   3   5  -4   74.67    1.95
   3   5  -4   82.45    3.83
   3   5  -4   75.63    1.96
  -3   5   4   75.72    1.95
  -3   5   4   78.43    1.94
  -3   5   4   75.54    1.95
  -3   5   4   72.81    2.68
  -3   5   4   78.79    1.93
   3   5  -4   75.38    1.93
   3   5  -4   75.99    1.96
  -3   5   4   73.08    3.31
  -3   5   4   74.23    1.97
   1  -5  -4   80.93    2.11
   1  -5  -4   86.60    3.04
   1  -5  -4   80.88    2.05
   1  -5  -4   81.65    2.10
  -1  -5   4   81.32    2.12
  -1  -5   4   81.13    3.10
  -1  -5   4   75.23    4.12
  -1  -5   4   81.17    2.11
   1  -5  -4   80.58    2.05
  -1  -5   4   81.84    2.11
   1  -5  -4   85.24    4.01
   1  -5  -4   79.67    2.08
   1   5  -4   80.79    2.09
   1   5  -4   80.99    2.11
  -1   5   4   81.41    2.09
  -1   5   4   79.37    2.92
   1   5  -4   85.49    3.94
   1   5  -4   88.87    3.07
  -1   5   4   82.33    2.08
  -1   5   4   80.56    2.11
  -1   5   4   81.00    2.10
   1   5  -4   80.67    2.11
  -1   5   4   80.11    2.11
  -1   5   4   81.23    3.70
   1   5  -4   81.44    2.09
   1   5  -4   80.44    2.10
   1   5  -4   81.55    2.11
   1  -5   4   96.88    2.46
   1  -5   4   95.83    2.41
  -1  -5  -4   95.56    2.44
  -1  -5  -4   94.63    2.45
  -1  -5  -4   96.90    2.42
   1  -5   4   96.51    4.58
   1  -5   4   97.03    3.50
  -1  -5  -4   87.78    2.48
   1  -5   4   96.05    2.47
[truncated: 704,389 more chars]
