# Supplementary material for: An enzymatic platform for the asymmetric amination of primary, secondary and tertiary C(sp3)–H bonds
Source: Springer Nature journal article supplement (doi:10.1038/s41557-019-0343-5), 2019-10-14
Supplement: MOESM137 [file 41557_2019_343_MOESM137_ESM.cif]

data_d19028
_audit_creation_date               2019-03-17
_audit_creation_method
;
Olex2 1.2
(compiled 2018.05.29 svn.r3508 for OlexSys, GUI svn.r5506),
 SHELXL-2018/3, and manual edit
;
_database_code_depnum_ccdc_archive ?
_audit_contact_author_name         'Xray Staff'
_audit_contact_author_email        xray@caltech.edu
_audit_contact_author_address      
;
Beckman Institute
Caltech 139-74
Pasadena CA 91125
USA
;
_audit_contact_author_phone        16263952741
_shelx_SHELXL_version_number       2018/3
_publ_contact_author_id_orcid      ?
_publ_section_references
;
Dolomanov, O.V., Bourhis, L.J., Gildea, R.J, Howard, J.A.K. & Puschmann, H.
 (2009), J. Appl. Cryst. 42, 339-341.

Sheldrick, G.M. (2008). Acta Cryst. A64, 112-122.
;
_chemical_name_common              ?
_chemical_name_systematic          ?
_chemical_formula_moiety           'C11 H16 N2 O2 S'
_chemical_formula_sum              'C11 H16 N2 O2 S'
_chemical_formula_weight           240.32
_chemical_absolute_configuration   ad
_chemical_melting_point            ?
loop_
  _atom_type_symbol
  _atom_type_description
  _atom_type_scat_dispersion_real
  _atom_type_scat_dispersion_imag
  _atom_type_scat_source
 'C' 'C' 0.0033 0.0016 'International Tables Vol C Tables 4.2.6.8 and 6.1.1.4'
 'H' 'H' 0.0000 0.0000 'International Tables Vol C Tables 4.2.6.8 and 6.1.1.4'
 'N' 'N' 0.0061 0.0033 'International Tables Vol C Tables 4.2.6.8 and 6.1.1.4'
 'O' 'O' 0.0106 0.0060 'International Tables Vol C Tables 4.2.6.8 and 6.1.1.4'
 'S' 'S' 0.1246 0.1234 'International Tables Vol C Tables 4.2.6.8 and 6.1.1.4'

_shelx_space_group_comment
;
The symmetry employed for this shelxl refinement is uniquely defined
by the following loop, which should always be used as a source of
symmetry information in preference to the above space-group names.
They are only intended as comments.
;
_space_group_crystal_system        'orthorhombic'
_space_group_IT_number             18
_space_group_name_H-M_alt          'P 21 21 2'
_space_group_name_Hall             'P 2 2ab'
loop_
  _space_group_symop_operation_xyz
 'x, y, z'
 '-x, -y, z'
 '-x+1/2, y+1/2, -z'
 'x+1/2, -y+1/2, -z'

_cell_length_a                     9.9738(19)
_cell_length_b                     18.878(6)
_cell_length_c                     6.1429(11)
_cell_angle_alpha                  90
_cell_angle_beta                   90
_cell_angle_gamma                  90
_cell_volume                       1156.6(5)
_cell_formula_units_Z              4
_cell_measurement_reflns_used      4063
_cell_measurement_temperature      100
_cell_measurement_theta_max        33.1
_cell_measurement_theta_min        2.3
_shelx_estimated_absorpt_T_max     0.984
_shelx_estimated_absorpt_T_min     0.882
_exptl_absorpt_coefficient_mu      0.267
_exptl_absorpt_correction_T_max    1.0000
_exptl_absorpt_correction_T_min    0.9360
_exptl_absorpt_correction_type     multi-scan
_exptl_absorpt_process_details     
;
SADABS-2016/2 (Bruker,2016/2) was used for absorption correction.
wR2(int) was 0.0538 before and 0.0478 after correction.
The Ratio of minimum to maximum transmission is 0.9360.
The \l/2 correction factor is Not present.
;
_exptl_absorpt_special_details     ?
_exptl_crystal_colour              colourless
_exptl_crystal_colour_primary      colourless
_exptl_crystal_density_diffrn      1.380
_exptl_crystal_density_meas        ?
_exptl_crystal_density_method      ?
_exptl_crystal_description         'bar'
_exptl_crystal_F_000               512
_exptl_crystal_size_max            0.48
_exptl_crystal_size_mid            0.17
_exptl_crystal_size_min            0.06
loop_
 _exptl_crystal_face_index_h
 _exptl_crystal_face_index_k
 _exptl_crystal_face_index_l
 _exptl_crystal_face_perp_dist
      0.00  1.00  0.00     0.030 
      0.00 -1.00  0.00     0.023 
     -1.00  1.00  0.00     0.081 
      1.00 -1.00  0.00     0.065 
      0.00  1.00  1.00     0.206 
      0.00 -1.00 -1.00     0.218 
     -1.00  0.00  0.00     0.087 
      1.00  0.00  0.00     0.071 
_exptl_transmission_factor_max     ?
_exptl_transmission_factor_min     ?
_diffrn_reflns_av_R_equivalents    0.0295
_diffrn_reflns_av_unetI/netI       0.0153
_diffrn_reflns_Laue_measured_fraction_full  0.990
_diffrn_reflns_Laue_measured_fraction_max  0.968
_diffrn_reflns_limit_h_max         15
_diffrn_reflns_limit_h_min         -15
_diffrn_reflns_limit_k_max         28
_diffrn_reflns_limit_k_min         -29
_diffrn_reflns_limit_l_max         9
_diffrn_reflns_limit_l_min         -9
_diffrn_reflns_number              53495
_diffrn_reflns_point_group_measured_fraction_full  0.994
_diffrn_reflns_point_group_measured_fraction_max  0.959
_diffrn_reflns_theta_full          25.242
_diffrn_reflns_theta_max           33.236
_diffrn_reflns_theta_min           2.309
_diffrn_ambient_temperature        100
_diffrn_detector                   'CMOS Area Detector'
_diffrn_detector_area_resol_mean   10.24
_diffrn_detector_type              'Bruker PHOTON 100'
_diffrn_measured_fraction_theta_full  0.990
_diffrn_measured_fraction_theta_max  0.968
_diffrn_measurement_device         '\k-geometry diffractometer'
_diffrn_measurement_device_type    'Bruker D8 Kappa'
_diffrn_measurement_method         '\w and \f scans'
_diffrn_radiation_monochromator    'Triumph focusing graphite'
_diffrn_radiation_type             MoK\a
_diffrn_radiation_wavelength       0.71073
_diffrn_source                     'sealed tube'
_diffrn_source_current             30
_diffrn_source_power               1.5
_diffrn_source_target              Mo
_diffrn_source_type                'Siemens KFF Mo 2K-90'
_diffrn_source_voltage             50
_diffrn_standards_interval_count   .
_diffrn_standards_interval_time    .
_diffrn_standards_number           0
_reflns_Friedel_coverage           0.725
_reflns_Friedel_fraction_full      1.000
_reflns_Friedel_fraction_max       0.947
_reflns_number_gt                  4163
_reflns_number_total               4273
_reflns_special_details
;
 Reflections were merged by SHELXL according to the crystal
 class for the calculation of statistics and refinement.
 
 _reflns_Friedel_fraction is defined as the number of unique
 Friedel pairs measured divided by the number that would be
 possible theoretically, ignoring centric projections and
 systematic absences.
;
_reflns_threshold_expression       'I > 2\s(I)'
_computing_data_collection        'BIS 2018.9.0.2/05-Oct-2018 & APEX3_2018.7-2 (Bruker-AXS, 2018)'
_computing_cell_refinement        'SAINT V8.38A (Bruker-AXS, 2016)'
_computing_data_reduction         'SAINT V8.38A (Bruker-AXS, 2016)'
_computing_structure_solution     'SHELXT-2014/5 (Sheldrick, 2013)'
_computing_structure_refinement   'SHELXL-2018/3 (Sheldrick, 2015)'
_computing_molecular_graphics     'DIAMOND 3 (Crystal Impact, 1999)'
_computing_publication_material   'Olex2 (Dolomanov et al., 2009)'
_refine_diff_density_max           0.288
_refine_diff_density_min           -0.224
_refine_diff_density_rms           0.043
_refine_ls_abs_structure_details
;
 Flack x determined using 1715 quotients [(I+)-(I-)]/[(I+)+(I-)]
 (Parsons, Flack and Wagner, Acta Cryst. B69 (2013) 249-259).
;
_refine_ls_abs_structure_Flack     0.020(8)
_refine_ls_abs_structure_Hooft     0.018(9)
_refine_ls_extinction_coef         0.039(5)
_refine_ls_extinction_expression  
 'Fc^*^=kFc[1+0.001xFc^2^\l^3^/sin(2\q)]^-1/4^'
_refine_ls_extinction_method       'SHELXL-2018/3 (Sheldrick 2018)'
_refine_ls_goodness_of_fit_ref     1.112
_refine_ls_hydrogen_treatment      refxyz
_refine_ls_matrix_type             full
_refine_ls_number_parameters       194
_refine_ls_number_reflns           4273
_refine_ls_number_restraints       0
_refine_ls_R_factor_all            0.0249
_refine_ls_R_factor_gt             0.0238
_refine_ls_restrained_S_all        1.112
_refine_ls_shift/su_max            0.001
_refine_ls_shift/su_mean           0.000
_refine_ls_structure_factor_coef   Fsqd
_refine_ls_weighting_details      
 'w=1/[\s^2^(Fo^2^)+(0.0289P)^2^+0.2111P] where P=(Fo^2^+2Fc^2^)/3'
_refine_ls_weighting_scheme        calc
_refine_ls_wR_factor_gt            0.0587
_refine_ls_wR_factor_ref           0.0592
_refine_special_details            ?
_olex2_refinement_description
;
1. Fixed Uiso
 At 1.2 times of:
  All C(H) groups, All C(H,H) groups, All N(H) groups
 At 1.5 times of:
  All C(H,H,H) groups
;
_atom_sites_solution_hydrogens     difmap
_atom_sites_solution_primary       ?
_atom_sites_solution_secondary     ?
loop_
  _atom_site_label
  _atom_site_type_symbol
  _atom_site_fract_x
  _atom_site_fract_y
  _atom_site_fract_z
  _atom_site_U_iso_or_equiv
  _atom_site_adp_type
  _atom_site_occupancy
  _atom_site_site_symmetry_order
  _atom_site_calc_flag
  _atom_site_refinement_flags_posn
  _atom_site_refinement_flags_adp
  _atom_site_refinement_flags_occupancy
  _atom_site_disorder_assembly
  _atom_site_disorder_group
 S1 S 0.52374(3) 0.22616(2) 0.47972(4) 0.01182(7) Uani 1 1 d . . . . .
 O1 O 0.64350(8) 0.25207(5) 0.37710(14) 0.01501(16) Uani 1 1 d . . . . .
 O2 O 0.43918(9) 0.17763(5) 0.36540(17) 0.01954(18) Uani 1 1 d . . . . .
 N1 N 0.43160(9) 0.29483(5) 0.54353(16) 0.01198(17) Uani 1 1 d . . . . .
 H1 H 0.3529(17) 0.2821(9) 0.576(3) 0.014 Uiso 1 1 d R . . . .
 N2 N 0.57256(11) 0.18953(6) 0.70872(17) 0.01615(19) Uani 1 1 d . . . . .
 C1 C 0.48713(11) 0.34591(6) 0.70748(18) 0.01238(18) Uani 1 1 d . . . . .
 C2 C 0.54186(12) 0.30546(7) 0.90728(19) 0.0169(2) Uani 1 1 d . . . . .
 H2A H 0.5898(18) 0.3389(9) 1.001(3) 0.020 Uiso 1 1 d R . . . .
 H2B H 0.4630(17) 0.2886(9) 0.996(3) 0.020 Uiso 1 1 d R . . . .
 C3 C 0.63595(13) 0.24404(7) 0.8500(2) 0.0180(2) Uani 1 1 d . . . . .
 H3A H 0.7143(19) 0.2615(10) 0.781(3) 0.022 Uiso 1 1 d R . . . .
 H3B H 0.6583(18) 0.2208(9) 0.987(3) 0.022 Uiso 1 1 d R . . . .
 C4 C 0.46875(18) 0.14708(7) 0.8180(2) 0.0264(3) Uani 1 1 d . . . . .
 H4A H 0.392(2) 0.1731(12) 0.840(4) 0.040 Uiso 1 1 d R . . . .
 H4B H 0.507(2) 0.1298(12) 0.955(4) 0.040 Uiso 1 1 d R . . . .
 H4C H 0.442(2) 0.1084(12) 0.722(4) 0.040 Uiso 1 1 d R . . . .
 C5 C 0.37219(12) 0.39524(6) 0.7704(2) 0.0144(2) Uani 1 1 d . . . . .
 C6 C 0.27682(12) 0.41502(6) 0.6162(2) 0.0178(2) Uani 1 1 d . . . . .
 H6 H 0.2820(18) 0.3961(10) 0.473(3) 0.021 Uiso 1 1 d R . . . .
 C7 C 0.17781(13) 0.46442(7) 0.6669(3) 0.0236(3) Uani 1 1 d . . . . .
 H7 H 0.112(2) 0.4763(10) 0.563(3) 0.028 Uiso 1 1 d R . . . .
 C8 C 0.17390(14) 0.49548(7) 0.8717(3) 0.0261(3) Uani 1 1 d . . . . .
 H8 H 0.110(2) 0.5292(10) 0.907(4) 0.031 Uiso 1 1 d R . . . .
 C9 C 0.26762(15) 0.47595(8) 1.0260(3) 0.0266(3) Uani 1 1 d . . . . .
 H9 H 0.267(2) 0.4988(13) 1.173(3) 0.032 Uiso 1 1 d R . . . .
 C10 C 0.36582(14) 0.42596(7) 0.9770(2) 0.0221(2) Uani 1 1 d . . . . .
 H10 H 0.427(2) 0.4143(10) 1.092(4) 0.026 Uiso 1 1 d R . . . .
 C11 C 0.59564(12) 0.39179(7) 0.6014(2) 0.0184(2) Uani 1 1 d . . . . .
 H11A H 0.673(2) 0.3658(10) 0.576(3) 0.028 Uiso 1 1 d R . . . .
 H11B H 0.6147(19) 0.4302(11) 0.691(4) 0.028 Uiso 1 1 d R . . . .
 H11C H 0.564(2) 0.4119(10) 0.470(4) 0.028 Uiso 1 1 d R . . . .

loop_
  _atom_site_aniso_label
  _atom_site_aniso_U_11
  _atom_site_aniso_U_22
  _atom_site_aniso_U_33
  _atom_site_aniso_U_23
  _atom_site_aniso_U_13
  _atom_site_aniso_U_12
 S1 0.00987(11) 0.01521(11) 0.01038(11) -0.00103(9) 0.00012(8) 0.00210(8)
 O1 0.0114(3) 0.0229(4) 0.0108(3) 0.0013(3) 0.0020(3) 0.0027(3)
 O2 0.0157(4) 0.0194(4) 0.0235(4) -0.0081(4) -0.0021(3) 0.0017(3)
 N1 0.0086(3) 0.0142(4) 0.0132(4) -0.0014(3) 0.0008(3) 0.0008(3)
 N2 0.0187(4) 0.0177(4) 0.0120(4) 0.0034(3) 0.0024(4) 0.0042(4)
 C1 0.0106(4) 0.0150(4) 0.0116(4) -0.0012(3) -0.0004(4) -0.0003(4)
 C2 0.0172(5) 0.0228(5) 0.0106(4) -0.0009(4) -0.0013(4) 0.0038(4)
 C3 0.0169(5) 0.0260(6) 0.0112(4) -0.0004(4) -0.0024(4) 0.0066(4)
 C4 0.0317(7) 0.0205(6) 0.0270(7) 0.0074(5) 0.0108(6) 0.0002(6)
 C5 0.0122(4) 0.0132(5) 0.0178(5) -0.0016(4) 0.0033(4) -0.0007(4)
 C6 0.0134(5) 0.0154(5) 0.0246(6) -0.0033(4) -0.0016(5) 0.0007(4)
 C7 0.0127(5) 0.0175(5) 0.0406(8) -0.0055(5) -0.0014(5) 0.0019(4)
 C8 0.0163(6) 0.0182(5) 0.0437(8) -0.0073(6) 0.0112(6) -0.0003(4)
 C9 0.0306(6) 0.0232(6) 0.0261(7) -0.0059(5) 0.0115(6) 0.0023(5)
 C10 0.0257(6) 0.0226(5) 0.0179(5) -0.0036(5) 0.0034(5) 0.0032(5)
 C11 0.0133(5) 0.0187(5) 0.0230(6) -0.0010(4) 0.0029(4) -0.0041(4)

_geom_special_details
;
 All esds (except the esd in the dihedral angle between two l.s. planes)
 are estimated using the full covariance matrix.  The cell esds are taken
 into account individually in the estimation of esds in distances, angles
 and torsion angles; correlations between esds in cell parameters are only
 used when they are defined by crystal symmetry.  An approximate (isotropic)
 treatment of cell esds is used for estimating esds involving l.s. planes.
;
loop_
  _geom_bond_atom_site_label_1
  _geom_bond_atom_site_label_2
  _geom_bond_distance
  _geom_bond_site_symmetry_2
  _geom_bond_publ_flag
 S1 O1 1.4364(9) . ?
 S1 O2 1.4295(10) . ?
 S1 N1 1.6367(10) . ?
 S1 N2 1.6414(11) . ?
 N1 H1 0.846(17) . ?
 N1 C1 1.5002(15) . ?
 N2 C3 1.4872(17) . ?
 N2 C4 1.4712(18) . ?
 C1 C2 1.5452(16) . ?
 C1 C5 1.5266(16) . ?
 C1 C11 1.5316(17) . ?
 C2 H2A 0.978(19) . ?
 C2 H2B 1.011(18) . ?
 C2 C3 1.5326(17) . ?
 C3 H3A 0.948(19) . ?
 C3 H3B 0.974(19) . ?
 C4 H4A 0.92(2) . ?
 C4 H4B 0.98(2) . ?
 C4 H4C 0.98(2) . ?
 C5 C6 1.3935(18) . ?
 C5 C10 1.3966(18) . ?
 C6 H6 0.952(19) . ?
 C6 C7 1.3936(17) . ?
 C7 H7 0.94(2) . ?
 C7 C8 1.388(2) . ?
 C8 H8 0.93(2) . ?
 C8 C9 1.381(2) . ?
 C9 H9 1.00(2) . ?
 C9 C10 1.3930(19) . ?
 C10 H10 0.96(2) . ?
 C11 H11A 0.93(2) . ?
 C11 H11B 0.93(2) . ?
 C11 H11C 0.95(2) . ?

loop_
  _geom_angle_atom_site_label_1
  _geom_angle_atom_site_label_2
  _geom_angle_atom_site_label_3
  _geom_angle
  _geom_angle_site_symmetry_1
  _geom_angle_site_symmetry_3
  _geom_angle_publ_flag
 O1 S1 N1 107.59(5) . . ?
 O1 S1 N2 105.84(5) . . ?
 O2 S1 O1 119.55(6) . . ?
 O2 S1 N1 107.09(5) . . ?
 O2 S1 N2 109.03(6) . . ?
 N1 S1 N2 107.16(5) . . ?
 S1 N1 H1 110.7(12) . . ?
 C1 N1 S1 117.55(7) . . ?
 C1 N1 H1 111.5(12) . . ?
 C3 N2 S1 109.56(8) . . ?
 C4 N2 S1 114.31(10) . . ?
 C4 N2 C3 114.19(11) . . ?
 N1 C1 C2 110.24(9) . . ?
 N1 C1 C5 106.55(9) . . ?
 N1 C1 C11 109.80(9) . . ?
 C5 C1 C2 111.44(9) . . ?
 C5 C1 C11 107.06(9) . . ?
 C11 C1 C2 111.57(10) . . ?
 C1 C2 H2A 108.7(11) . . ?
 C1 C2 H2B 108.2(10) . . ?
 H2A C2 H2B 105.4(15) . . ?
 C3 C2 C1 114.07(9) . . ?
 C3 C2 H2A 108.9(10) . . ?
 C3 C2 H2B 111.2(10) . . ?
 N2 C3 C2 113.40(10) . . ?
 N2 C3 H3A 109.4(12) . . ?
 N2 C3 H3B 106.8(11) . . ?
 C2 C3 H3A 110.1(11) . . ?
 C2 C3 H3B 106.4(11) . . ?
 H3A C3 H3B 110.7(16) . . ?
 N2 C4 H4A 111.3(14) . . ?
 N2 C4 H4B 107.4(14) . . ?
 N2 C4 H4C 108.9(14) . . ?
 H4A C4 H4B 112(2) . . ?
 H4A C4 H4C 105.0(19) . . ?
 H4B C4 H4C 112.0(18) . . ?
 C6 C5 C1 120.25(11) . . ?
 C6 C5 C10 118.38(11) . . ?
 C10 C5 C1 121.17(11) . . ?
 C5 C6 H6 119.5(11) . . ?
 C5 C6 C7 120.73(12) . . ?
 C7 C6 H6 119.7(11) . . ?
 C6 C7 H7 120.0(12) . . ?
 C8 C7 C6 120.34(14) . . ?
 C8 C7 H7 119.7(12) . . ?
 C7 C8 H8 121.3(14) . . ?
 C9 C8 C7 119.34(13) . . ?
 C9 C8 H8 119.3(14) . . ?
 C8 C9 H9 120.0(13) . . ?
 C8 C9 C10 120.56(14) . . ?
 C10 C9 H9 119.4(13) . . ?
 C5 C10 H10 122.9(12) . . ?
 C9 C10 C5 120.64(13) . . ?
 C9 C10 H10 116.5(12) . . ?
 C1 C11 H11A 111.3(12) . . ?
 C1 C11 H11B 109.4(13) . . ?
 C1 C11 H11C 111.0(12) . . ?
 H11A C11 H11B 110.0(17) . . ?
 H11A C11 H11C 109.8(17) . . ?
 H11B C11 H11C 105.2(17) . . ?

loop_
  _geom_hbond_atom_site_label_D
  _geom_hbond_atom_site_label_H
  _geom_hbond_atom_site_label_A
  _geom_hbond_distance_DH
  _geom_hbond_distance_HA
  _geom_hbond_distance_DA
  _geom_hbond_angle_DHA
  _geom_hbond_site_symmetry_A
  _geom_hbond_publ_flag
 N1 H1 O1 0.846(17) 2.204(17) 3.0461(14) 173.7(16) 4_456 yes

loop_
  _geom_torsion_atom_site_label_1
  _geom_torsion_atom_site_label_2
  _geom_torsion_atom_site_label_3
  _geom_torsion_atom_site_label_4
  _geom_torsion
  _geom_torsion_site_symmetry_1
  _geom_torsion_site_symmetry_2
  _geom_torsion_site_symmetry_3
  _geom_torsion_site_symmetry_4
  _geom_torsion_publ_flag
 S1 N1 C1 C2 -47.72(11) . . . . ?
 S1 N1 C1 C5 -168.78(8) . . . . ?
 S1 N1 C1 C11 75.60(11) . . . . ?
 S1 N2 C3 C2 59.68(12) . . . . ?
 O1 S1 N1 C1 -63.96(9) . . . . ?
 O1 S1 N2 C3 62.09(9) . . . . ?
 O1 S1 N2 C4 -168.30(9) . . . . ?
 O2 S1 N1 C1 166.34(8) . . . . ?
 O2 S1 N2 C3 -168.11(8) . . . . ?
 O2 S1 N2 C4 -38.49(11) . . . . ?
 N1 S1 N2 C3 -52.52(9) . . . . ?
 N1 S1 N2 C4 77.10(10) . . . . ?
 N1 C1 C2 C3 49.58(13) . . . . ?
 N1 C1 C5 C6 -34.83(14) . . . . ?
 N1 C1 C5 C10 150.32(11) . . . . ?
 N2 S1 N1 C1 49.47(9) . . . . ?
 C1 C2 C3 N2 -58.83(14) . . . . ?
 C1 C5 C6 C7 -174.79(11) . . . . ?
 C1 C5 C10 C9 173.97(12) . . . . ?
 C2 C1 C5 C6 -155.13(11) . . . . ?
 C2 C1 C5 C10 30.02(15) . . . . ?
 C4 N2 C3 C2 -69.99(14) . . . . ?
 C5 C1 C2 C3 167.68(10) . . . . ?
 C5 C6 C7 C8 0.9(2) . . . . ?
 C6 C5 C10 C9 -0.97(19) . . . . ?
 C6 C7 C8 C9 -1.2(2) . . . . ?
 C7 C8 C9 C10 0.4(2) . . . . ?
 C8 C9 C10 C5 0.7(2) . . . . ?
 C10 C5 C6 C7 0.19(18) . . . . ?
 C11 C1 C2 C3 -72.71(13) . . . . ?
 C11 C1 C5 C6 82.61(13) . . . . ?
 C11 C1 C5 C10 -92.23(13) . . . . ?

_shelx_res_file
;
TITL d19028 in P2(1)2(1)2
    d19028.res
    created by SHELXL-2018/3 at 01:26:10 on 17-Mar-2019
CELL 0.71073 9.9738 18.8776 6.1429 90 90 90
ZERR 4 0.0019 0.0055 0.0011 0 0 0
LATT -1
SYMM -X,-Y,+Z
SYMM 0.5-X,0.5+Y,-Z
SYMM 0.5+X,0.5-Y,-Z
SFAC C H N O S
UNIT 44 64 8 8 4
EQIV $1 -0.5+X,0.5-Y,1-Z

L.S. 25
PLAN  30
SIZE 0.06 0.17 0.48
TEMP -173.15
HTAB N1 O1_$1
BOND $H
list 4
wpdb
htab
conf
fmap -2
acta
REM <olex2.extras>
REM <HklSrc "%.\\d19028.hkl">
REM </olex2.extras>

WGHT    0.028900    0.211100
EXTI    0.038992
FVAR       0.48309
S1    5    0.523742    0.226158    0.479722    11.00000    0.00987    0.01521 =
         0.01038   -0.00103    0.00012    0.00210
O1    4    0.643498    0.252072    0.377100    11.00000    0.01141    0.02288 =
         0.01076    0.00127    0.00204    0.00271
O2    4    0.439181    0.177632    0.365405    11.00000    0.01570    0.01939 =
         0.02352   -0.00806   -0.00207    0.00171
N1    3    0.431600    0.294833    0.543532    11.00000    0.00861    0.01416 =
         0.01317   -0.00140    0.00075    0.00083
H1    2    0.352857    0.282098    0.576278    11.00000   -1.20000
N2    3    0.572561    0.189528    0.708720    11.00000    0.01868    0.01774 =
         0.01203    0.00335    0.00237    0.00415
C1    1    0.487128    0.345911    0.707479    11.00000    0.01055    0.01502 =
         0.01157   -0.00121   -0.00036   -0.00033
C2    1    0.541865    0.305459    0.907283    11.00000    0.01716    0.02282 =
         0.01062   -0.00092   -0.00134    0.00382
H2A   2    0.589818    0.338886    1.000857    11.00000   -1.20000
H2B   2    0.462962    0.288553    0.996471    11.00000   -1.20000
C3    1    0.635954    0.244038    0.850001    11.00000    0.01686    0.02602 =
         0.01123   -0.00037   -0.00238    0.00658
H3A   2    0.714307    0.261543    0.781260    11.00000   -1.20000
H3B   2    0.658271    0.220788    0.986916    11.00000   -1.20000
C4    1    0.468749    0.147085    0.817965    11.00000    0.03171    0.02048 =
         0.02704    0.00739    0.01085    0.00021
H4A   2    0.391524    0.173119    0.839784    11.00000   -1.50000
H4B   2    0.507071    0.129780    0.954646    11.00000   -1.50000
H4C   2    0.442083    0.108377    0.722117    11.00000   -1.50000
C5    1    0.372192    0.395235    0.770425    11.00000    0.01223    0.01323 =
         0.01782   -0.00160    0.00330   -0.00067
C6    1    0.276822    0.415016    0.616200    11.00000    0.01336    0.01543 =
         0.02464   -0.00332   -0.00165    0.00070
H6    2    0.281964    0.396147    0.472662    11.00000   -1.20000
C7    1    0.177813    0.464424    0.666919    11.00000    0.01268    0.01754 =
         0.04059   -0.00552   -0.00145    0.00186
H7    2    0.112342    0.476337    0.562843    11.00000   -1.20000
C8    1    0.173900    0.495479    0.871698    11.00000    0.01632    0.01816 =
         0.04373   -0.00729    0.01121   -0.00033
H8    2    0.109595    0.529195    0.906943    11.00000   -1.20000
C9    1    0.267625    0.475949    1.025979    11.00000    0.03057    0.02320 =
         0.02608   -0.00587    0.01152    0.00231
H9    2    0.267046    0.498848    1.173186    11.00000   -1.20000
C10   1    0.365821    0.425957    0.976983    11.00000    0.02566    0.02265 =
         0.01792   -0.00360    0.00342    0.00320
H10   2    0.427496    0.414316    1.092032    11.00000   -1.20000
C11   1    0.595636    0.391793    0.601436    11.00000    0.01334    0.01874 =
         0.02297   -0.00104    0.00293   -0.00407
H11A  2    0.673214    0.365808    0.575526    11.00000   -1.50000
H11B  2    0.614748    0.430234    0.691333    11.00000   -1.50000
H11C  2    0.564419    0.411877    0.469537    11.00000   -1.50000
HKLF 4


REM  d19028 in P2(1)2(1)2
REM wR2 = 0.059184, GooF = S = 1.11171, Restrained GooF = 1.11171 for all data
REM R1 = 0.023834 for 4163 Fo > 4sig(Fo) and 0.024919 for all 4273 data
REM 194 parameters refined using 0 restraints

END

WGHT      0.0289      0.2111

REM Instructions for potential hydrogen bonds
HTAB N1 O1_$1
EQIV $2 x, y, z+1
HTAB C3 O1_$2
HTAB C11 O1

REM Highest difference peak  0.288,  deepest hole -0.224,  1-sigma level  0.043
Q1    1   0.5174  0.3238  0.8147  11.00000  0.05    0.29
Q2    1   0.3283  0.4078  0.6907  11.00000  0.05    0.26
Q3    1   0.1887  0.4765  0.7840  11.00000  0.05    0.25
Q4    1   0.5422  0.3677  0.6516  11.00000  0.05    0.25
Q5    1   0.4715  0.2631  0.5288  11.00000  0.05    0.24
Q6    1   0.3701  0.4089  0.8740  11.00000  0.05    0.23
Q7    1   0.4762  0.1989  0.4219  11.00000  0.05    0.23
Q8    1   0.5984  0.2776  0.8617  11.00000  0.05    0.23
Q9    1   0.4277  0.3711  0.7343  11.00000  0.05    0.23
Q10   1   0.5278  0.2393  0.5733  11.00000  0.05   -0.22
Q11   1   0.4710  0.3161  0.6252  11.00000  0.05    0.22
Q12   1   0.5828  0.2497  0.4067  11.00000  0.05    0.21
Q13   1   0.2296  0.4361  0.6292  11.00000  0.05    0.21
Q14   1   0.2245  0.4809  0.9347  11.00000  0.05    0.20
Q15   1   0.4817  0.2316  0.4755  11.00000  0.05   -0.20
Q16   1   0.3158  0.4508  1.0139  11.00000  0.05    0.20
Q17   1   0.5576  0.2021  0.6051  11.00000  0.05    0.19
Q18   1   0.5764  0.1951  0.4963  11.00000  0.05   -0.19
Q19   1   0.5399  0.2576  0.4726  11.00000  0.05   -0.19
Q20   1   0.4972  0.2207  0.5119  11.00000  0.05   -0.18
Q21   1   0.5215  0.1665  0.7544  11.00000  0.05    0.18
Q22   1   0.5981  0.2142  0.7861  11.00000  0.05    0.18
Q23   1   0.5238  0.3027  0.5294  11.00000  0.05   -0.17
Q24   1   0.5329  0.2076  0.4734  11.00000  0.05   -0.17
Q25   1   0.4115  0.2474  0.5680  11.00000  0.05   -0.17
Q26   1   0.5190  0.2451  0.2481  11.00000  0.05   -0.17
Q27   1   0.4801  0.3690  0.5313  11.00000  0.05   -0.16
Q28   1   0.5040  0.2271  0.8475  11.00000  0.05   -0.16
Q29   1   0.4807  0.1494  0.2999  11.00000  0.05    0.14
Q30   1   0.4175  0.2230  0.5056  11.00000  0.05   -0.14
;
_shelx_res_checksum                20342
_shelx_hkl_file
;
   1   0   0    1.31    0.13
   1   0   0    1.11    0.24
   1   0   0    1.19    0.11
   1   0   0    1.13    0.20
   1   0   0    1.15    0.12
   1   0   0    1.02    0.11
   1   0   0    1.03    0.11
   1   0   0    1.09    0.11
   1   0   0    0.95    0.14
  -1   0   0    0.98    0.17
  -1   0   0    1.10    0.13
  -1   0   0    1.07    0.11
  -1   0   0    1.09    0.12
   3   0   0    0.06    0.16
  -3   0   0   -0.07    0.17
   3   0   0    0.26    0.45
  -3   0   0    0.13    0.17
  -3   0   0    0.03    0.16
  -3   0   0    0.19    0.21
   3   0   0   -0.09    0.28
   3   0   0   -0.08    0.22
   3   0   0    0.01    0.17
  -3   0   0    0.09    0.21
   3   0   0    0.04    0.23
   3   0   0    0.03    0.17
   3   0   0   -0.08    0.17
   3   0   0   -0.19    0.15
  -3   0   0    0.04    0.17
  -3   0   0   -0.20    0.22
  -4   0   0    0.85    0.24
  -4   0   0    0.74    0.20
  -4   0   0    0.72    0.19
   4   0   0    0.41    0.49
  -4   0   0    0.42    0.19
   4   0   0    0.64    0.18
   4   0   0    0.11    0.25
   4   0   0    0.45    0.19
   4   0   0    0.54    0.21
   4   0   0    0.50    0.17
   4   0   0    0.53    0.18
   4   0   0    0.85    0.32
   4   0   0    0.48    0.24
  -4   0   0    0.27    0.26
  -4   0   0    1.13    0.25
  -4   0   0    0.49    0.18
  -5   0   0    0.28    0.21
  -5   0   0   -0.12    0.19
   5   0   0   -0.04    0.17
  -5   0   0    0.19    0.26
   5   0   0   -0.09    0.33
   5   0   0   -0.36    0.24
   5   0   0   -0.62    0.51
  -5   0   0    0.23    0.19
  -5   0   0    0.79    0.30
   5   0   0    0.03    0.27
   5   0   0   -0.03    0.19
   5   0   0   -0.09    0.17
  -5   0   0   -0.06    0.29
  -5   0   0    0.70    0.28
   6   0   0   44.80    1.59
   6   0   0   42.61    2.08
   6   0   0   39.50    1.68
  -6   0   0   47.75    1.54
  -6   0   0   45.20    1.52
   6   0   0   46.34    1.53
  -6   0   0   46.06    1.60
   6   0   0   46.03    1.54
   6   0   0   46.26    1.51
  -6   0   0   43.20    1.60
   6   0   0   46.07    1.52
   6   0   0   44.38    1.76
  -6   0   0   44.30    1.82
  -6   0   0   45.84    1.53
  -6   0   0   44.35    1.60
   6   0   0   45.24    1.50
  -6   0   0   45.79    1.51
  -7   0   0   -0.02    0.21
   7   0   0   -0.03    0.30
  -7   0   0   -0.08    0.39
   7   0   0    0.18    0.22
  -7   0   0   -0.49    0.25
   7   0   0   -0.47    0.19
   7   0   0   -0.29    0.68
  -7   0   0    0.20    0.36
  -7   0   0    0.13    0.26
  -7   0   0   -0.13    0.22
   7   0   0    0.04    0.22
   7   0   0    0.02    0.21
  -7   0   0    0.17    0.36
   7   0   0    0.03    0.33
  -7   0   0    0.29    0.35
  -8   0   0    8.50    0.60
   8   0   0    7.79    0.65
   8   0   0    7.97    0.51
  -8   0   0    7.75    0.53
   8   0   0    8.70    0.55
  -8   0   0    8.71    0.74
   8   0   0    9.69    0.55
  -8   0   0    8.00    0.55
  -8   0   0    8.73    0.76
  -8   0   0    9.63    1.08
   8   0   0    6.07    1.40
   8   0   0    8.95    0.71
  -8   0   0    9.29    0.69
   9   0   0   -0.65    0.40
   9   0   0   -0.51    0.28
  -9   0   0   -0.08    0.49
  -9   0   0   -0.39    0.32
  -9   0   0   -0.11    0.29
  -9   0   0    0.71    0.48
   9   0   0    0.03    0.42
   9   0   0   -0.70    0.93
   9   0   0    0.05    0.29
  -9   0   0   -0.15    0.29
  -9   0   0   -0.10    0.54
  10   0   0   64.76    2.39
 -10   0   0   66.60    2.27
  10   0   0   60.47    2.47
  10   0   0   63.27    2.21
  10   0   0   67.10    2.26
  10   0   0   67.24    2.30
  10   0   0   66.39    3.35
 -10   0   0   68.73    2.88
 -10   0   0   67.34    2.43
 -10   0   0   66.28    2.26
 -10   0   0   66.90    2.45
 -11   0   0    0.32    0.56
 -11   0   0    0.11    0.39
  11   0   0    0.19    0.56
 -11   0   0   -0.58    0.65
  11   0   0   -0.33    1.20
  11   0   0   -0.63    0.43
 -12   0   0    7.44    0.93
 -12   0   0    6.06    1.02
 -12   0   0    8.48    1.07
  12   0   0    8.92    1.05
 -12   0   0    7.72    0.92
 -13   0   0   -0.34    0.87
 -13   0   0   -0.36    0.78
  13   0   0   -0.19    0.53
 -13   0   0    0.12    0.51
  13   0   0    2.17    1.60
 -14   0   0    2.45    0.96
 -14   0   0    2.95    0.63
 -14   0   0    2.82    0.88
  14   0   0    3.35    0.63
   0  -1   0    0.02    0.03
   0  -1   0    0.03    0.03
   0  -1   0    0.01    0.01
   0   1   0    0.01    0.04
   0  -1   0    0.02    0.03
  -1  -1   0   20.00    0.74
  -1  -1   0   22.37    0.72
   1  -1   0   22.71    0.78
   1  -1   0   22.32    0.73
   1  -1   0   23.31    0.73
  -1  -1   0   23.31    0.72
  -1  -1   0   23.11    0.76
  -1  -1   0   22.43    0.77
  -1  -1   0   22.13    0.72
  -1  -1   0   22.41    0.72
  -1  -1   0   22.64    0.72
   1   1   0   22.27    0.74
  -1   1   0   22.93    0.72
   1   1   0   22.84    0.72
   1  -1   0   22.58    0.72
   1  -1   0   22.49    0.73
   1  -1   0   22.24    0.72
   1  -1   0   21.57    0.71
  -1   1   0   21.63    0.83
   1   1   0   22.84    0.72
  -1   1   0   22.67    0.71
  -1   1   0   22.06    0.72
  -1   1   0   21.98    0.73
  -1   1   0   22.44    0.73
  -1   1   0   22.90    0.73
   1   1   0   22.69    0.75
   2  -1   0  305.58    9.44
  -2  -1   0  304.57    9.52
   2   1   0  313.48    9.43
  -2  -1   0  310.65    9.44
  -2   1   0  300.22    9.45
   2   1   0  304.91    9.44
   2  -1   0  305.66    9.43
   2  -1   0  293.86    9.45
  -2   1   0  302.78    9.43
  -2   1   0  306.27    9.52
   2   1   0  299.92    9.43
  -2   1   0  307.47    9.44
  -2   1   0  307.80    9.43
   2  -1   0  309.32    9.44
  -2  -1   0  305.20    9.43
   3  -1   0   40.62    1.37
   3  -1   0   37.54    1.46
   3  -1   0   40.09    1.65
   3  -1   0   41.67    1.34
   3   1   0   42.82    1.36
   3   1   0   41.43    1.36
  -3   1   0   40.70    1.39
   3   1   0   41.96    1.35
  -3   1   0   43.18    1.37
  -3   1   0   41.43    1.36
  -3   1   0   42.19    1.40
   3  -1   0   41.86    1.37
   3  -1   0   41.24    1.50
   3  -1   0   42.58    1.35
  -3  -1   0   42.41    1.43
  -3  -1   0   42.16    1.35
  -3  -1   0   40.29    1.40
   3  -1   0   41.20    1.35
   3  -1   0   41.51    1.39
   3   1   0   40.47    1.46
   3   1   0   41.36    1.42
   3   1   0   41.82    1.50
  -3   1   0   42.28    1.38
  -3   1   0   41.93    1.36
  -3   1   0   43.01    1.68
  -3   1   0   40.30    1.51
   3   1   0   42.36    1.35
  -3  -1   0   41.72    1.39
  -3  -1   0   42.35    1.35
  -3  -1   0   40.29    1.51
  -3  -1   0   42.21    1.36
  -3  -1   0   43.12    1.36
   3  -1   0   42.92    1.37
  -3   1   0   41.84    1.37
  -4  -1   0    7.55    0.39
  -4   1   0    8.24    0.85
   4   1   0    7.00    0.47
   4   1   0    7.39    0.39
   4   1   0    7.36    0.38
  -4  -1   0    7.91    0.51
  -4  -1   0    6.90    0.38
  -4   1   0    7.81    0.48
  -4   1   0    7.76    0.40
   4  -1   0    7.24    0.39
   4  -1   0    7.60    0.41
   4   1   0    6.92    0.42
  -4  -1   0    6.81    0.46
  -4   1   0    7.44    0.41
   4  -1   0    7.50    0.36
  -4   1   0    7.30    0.65
   4   1   0    6.96    0.39
  -4  -1   0    6.68    0.63
   4   1   0    6.50    0.82
  -4  -1   0    7.42    0.41
  -4  -1   0    7.30    0.45
   4  -1   0    7.21    0.57
   4  -1   0    6.84    0.42
   4  -1   0    6.34    0.80
  -4   1   0    7.73    0.40
   4  -1   0    7.77    0.42
   4  -1   0    7.99    0.40
   4  -1   0    7.15    0.45
  -4   1   0    6.98    0.46
  -4  -1   0    7.30    0.40
   4  -1   0    7.10    0.62
  -4   1   0    7.97    0.43
   4   1   0    7.26    0.41
  -5   1   0   69.45    2.23
   5   1   0   64.67    2.25
  -5  -1   0   69.32    2.27
  -5   1   0   64.16    2.41
   5  -1   0   69.98    2.20
  -5   1   0   69.92    2.20
  -5   1   0   69.55    2.18
   5   1   0   67.07    2.17
   5  -1   0   61.36    2.24
   5  -1   0   67.75    2.40
  -5  -1   0   69.23    2.19
  -5   1   0   64.42    2.24
  -5   1   0   66.09    2.25
  -5  -1   0   65.40    2.25
   5   1   0   77.05    2.34
  -5  -1   0   70.21    2.20
  -5  -1   0   68.68    2.17
  -5  -1   0   67.51    2.24
  -5   1   0   67.48    2.20
   5   1   0   67.45    2.21
   5   1   0   68.27    2.40
   5   1   0   69.57    2.19
   5  -1   0   64.74    2.18
   5  -1   0   68.12    2.18
   5  -1   0   68.31    2.18
  -5   1   0   66.24    2.25
   5  -1   0   64.67    2.22
   5  -1   0   64.65    2.62
  -5  -1   0   67.89    2.43
   5   1   0   71.09    2.18
   5   1   0   64.95    2.64
   6  -1   0    4.64    0.38
   6  -1   0    4.60    0.34
   6  -1   0    4.24    0.35
   6   1   0    4.55    0.57
   6  -1   0    4.66    0.45
  -6   1   0    4.40    0.51
   6  -1   0    3.86    0.63
   6  -1   0    4.39    0.82
   6  -1   0    4.95    0.65
  -6  -1   0    4.11    0.41
  -6  -1   0    4.40    0.36
  -6  -1   0    4.69    0.50
  -6   1   0    4.33    0.45
  -6  -1   0    4.13    0.73
   6   1   0    4.70    0.83
  -6   1   0    4.21    0.74
  -6   1   0    4.64    0.39
  -6   1   0    3.91    0.42
   6   1   0    3.67    0.35
   6  -1   0    4.80    0.38
  -6  -1   0    4.07    0.41
  -6  -1   0    4.55    0.50
   6   1   0    4.87    0.40
   6   1   0    4.92    0.64
  -6   1   0    4.02    0.51
  -6  -1   0    5.17    0.53
   6   1   0    4.02    0.53
   6   1   0    4.43    0.38
   6   1   0    4.56    0.44
   6   1   0    4.86    0.38
   6  -1   0    4.35    0.41
  -6  -1   0    4.63    0.39
  -6   1   0    4.15    0.42
  -6   1   0    4.70    0.38
  -7  -1   0    0.82    0.42
  -7  -1   0    1.06    0.24
  -7   1   0    0.79    0.43
   7   1   0    1.40    0.26
   7  -1   0    0.47    0.72
   7   1   0    0.63    0.31
   7  -1   0    1.06    0.26
   7  -1   0    0.94    0.33
  -7   1   0    1.54    0.38
  -7  -1   0    1.17    0.29
   7   1   0    1.13    0.25
  -7   1   0    1.21    0.28
  -7   1   0    1.25    0.26
   7  -1   0    0.81    0.41
  -7   1   0    1.11    0.37
   7   1   0    1.08    0.23
  -7   1   0    1.31    0.39
  -7  -1   0    1.25    0.38
   7   1   0    1.30    0.26
   7  -1   0    1.34    0.22
   7  -1   0    1.00    0.25
   7   1   0    0.49    0.74
  -7  -1   0    0.81    0.25
   7  -1   0    0.83    0.23
   7   1   0    1.23    0.40
  -7  -1   0    1.15    0.36
  -7   1   0    1.19    0.26
  -7  -1   0    1.61    0.40
  -7  -1   0    1.18    0.29
   8   1   0  210.06    6.85
   8  -1   0  203.23    7.44
  -8   1   0  213.80    6.74
  -8  -1   0  214.15    6.87
  -8   1   0  210.66    6.84
   8  -1   0  214.79    6.73
   8  -1   0  212.70    6.77
  -8  -1   0  216.12    6.73
   8  -1   0  220.37    6.76
  -8   1   0  218.69    6.83
  -8   1   0  213.84    7.13
  -8   1   0  214.96    6.76
   8   1   0  206.05    7.48
   8  -1   0  201.58    6.80
  -8   1   0  211.82    6.86
  -8  -1   0  220.08    6.74
   8   1   0  216.39    6.72
   8   1   0  215.80    6.75
   8  -1   0  221.98    6.73
  -8  -1   0  217.29    6.76
   8   1   0  218.50    6.76
  -8  -1   0  212.77    6.83
  -8  -1   0  209.09    6.85
  -8  -1   0  215.29    7.12
   8   1   0  217.40    6.77
  -8   1   0  222.38    6.74
  -9  -1   0  179.11    6.22
   9  -1   0  178.53    5.75
   9  -1   0  181.80    5.81
   9   1   0  183.51    5.80
  -9   1   0  180.61    5.90
  -9   1   0  184.18    5.77
   9  -1   0  188.60    5.75
   9   1   0  175.20    6.62
   9   1   0  188.81    5.81
   9  -1   0  179.93    5.86
  -9  -1   0  183.50    5.77
  -9   1   0  180.33    5.87
   9   1   0  184.68    5.79
  -9   1   0  183.52    5.78
  -9   1   0  182.36    6.24
  -9  -1   0  185.27    5.79
   9   1   0  178.12    5.75
   9  -1   0  187.39    5.80
  -9  -1   0  183.13    5.93
  -9   1   0  182.01    5.92
   9   1   0  177.05    5.90
  -9  -1   0  183.64    5.90
  -9  -1   0  185.31    5.76
   9  -1   0  174.90    6.62
  -9   1   0  181.96    5.80
 -10   1   0   91.37    3.63
  10  -1   0   90.38    3.01
 -10  -1   0   95.05    3.22
  10   1   0   93.37    4.14
  10  -1   0   92.04    4.13
  10   1   0   92.07    3.20
  10   1   0   92.76    3.06
 -10   1   0   90.95    3.04
 -10  -1   0   94.82    3.07
  10   1   0   92.88    3.01
  10   1   0   89.06    3.19
  10  -1   0   89.52    3.08
 -10  -1   0   92.77    3.24
 -10  -1   0   93.03    3.04
 -10   1   0   93.11    3.07
  10   1   0   94.27    3.09
 -10   1   0   92.97    3.23
  10  -1   0   89.93    3.15
 -10  -1   0   91.69    3.62
  10  -1   0   92.19    3.12
 -10   1   0   92.02    3.22
 -11   1   0   59.37    2.73
 -11  -1   0   55.51    2.26
 -11  -1   0   59.43    2.03
 -11   1   0   57.89    2.25
 -11   1   0   56.81    2.28
  11  -1   0   56.76    2.17
 -11  -1   0   56.23    2.70
 -11   1   0   55.56    2.02
  11   1   0   55.33    2.20
  11   1   0   57.06    2.06
  11   1   0   57.46    3.27
 -11  -1   0   60.84    2.55
  11  -1   0   55.44    2.06
  11  -1   0   59.53    3.32
  12   1   0   79.17    2.95
  12  -1   0   83.49    4.18
 -12  -1   0   81.16    2.73
  12  -1   0   69.65    3.18
 -12   1   0   77.37    2.96
 -12  -1   0   80.12    3.48
 -12  -1   0   81.82    2.99
 -12  -1   0   80.14    2.97
  12   1   0   84.97    4.24
  12   1   0   77.07    2.86
 -12   1   0   85.01    3.02
  12  -1   0   69.88    3.45
  13  -1   0   10.16    0.90
  13   1   0   11.41    1.17
  13   1   0    8.10    0.92
 -13  -1   0   10.76    1.24
 -13   1   0   10.22    1.14
 -13   1   0    8.78    0.92
 -13  -1   0    7.28    1.20
 -13  -1   0   10.44    1.35
 -13   1   0   10.42    1.29
 -13  -1   0    9.56    0.91
  14   1   0   45.19    1.79
 -14   1   0   46.55    2.28
 -14   1   0   47.17    1.85
 -14  -1   0   45.91    1.87
  14  -1   0   45.80    1.84
 -14  -1   0   42.18    2.25
 -14   1   0   46.11    2.23
  14  -1   0   49.66    3.69
 -14  -1   0   47.20    2.23
  -3   2   0  125.67    3.90
  -3   2   0  118.05    3.90
  -3   2   0  123.38    3.92
  -3  -2   0  125.02    3.95
  -3  -2   0  121.19    4.01
   3  -2   0  127.48    3.85
  -3   2   0  122.80    3.88
   3  -2   0  119.90    4.14
   3   2   0  126.24    3.88
   3  -2   0  125.99    3.91
  -3   2   0  124.88    3.89
  -3   2   0  126.45    3.88
   3  -2   0  128.38    3.89
   3  -2   0  122.39    3.88
   3   2   0  120.20    3.95
   3   2   0  129.34    3.89
  -3   2   0  124.36    3.90
  -3  -2   0  123.54    3.89
   3   2   0  130.16    4.02
   3  -2   0  115.13    3.87
   3  -2   0  125.62    4.01
  -3  -2   0  125.92    3.87
  -3   2   0  127.97    4.17
  -3   2   0  119.38    3.85
  -3  -2   0  121.92    3.89
   3   2   0  122.02    3.89
   3   2   0  117.38    3.93
  -3  -2   0  127.04    3.88
  -3  -2   0  128.39    3.89
   3  -2   0  126.98    3.90
   3  -2   0  121.43    3.90
   4  -2   0   44.81    1.52
   4   2   0   42.02    1.55
  -4   2   0   45.29    1.49
   4  -2   0   41.79    1.47
  -4  -2   0   44.27    1.47
  -4  -2   0   45.10    1.46
  -4  -2   0   43.72    1.53
  -4   2   0   44.92    1.53
   4   2   0   44.74    1.48
  -4  -2   0   44.15    1.67
   4  -2   0   43.91    1.49
   4  -2   0   46.09    1.44
   4  -2   0   46.02    1.48
  -4   2   0   43.96    1.68
  -4   2   0   43.40    1.52
   4   2   0   45.63    1.47
  -4   2   0   45.45    1.48
   4   2   0   44.59    1.65
  -4   2   0   46.80    1.88
   4  -2   0   43.79    1.47
  -4  -2   0   46.32    1.48
  -4   2   0   45.21    1.48
  -4  -2   0   45.98    1.57
   4  -2   0   42.62    1.84
   4   2   0   43.96    1.48
   4   2   0   47.64    1.57
   4   2   0   44.40    1.46
  -4   2   0   45.22    1.49
  -4  -2   0   44.69    1.48
   4  -2   0   46.14    1.66
   4  -2   0   44.83    1.49
  -4  -2   0   44.01    1.50
   5   2   0   43.26    1.46
   5   2   0   43.14    1.49
   5   2   0   45.20    1.44
   5  -2   0   46.33    1.64
   5   2   0   41.46    1.55
  -5   2   0   41.71    1.52
  -5  -2   0   40.97    1.69
   5  -2   0   44.46    1.68
   5   2   0   43.33    1.68
  -5  -2   0   43.49    1.46
  -5   2   0   44.53    1.46
   5   2   0   41.82    1.95
  -5   2   0   44.02    1.90
  -5   2   0   44.73    1.48
  -5  -2   0   44.59    1.46
   5   2   0   43.93    1.44
  -5   2   0   41.57    1.53
   5  -2   0   43.86    1.49
  -5   2   0   44.50    1.48
  -5   2   0   42.43    1.71
   5  -2   0   40.38    1.46
  -5  -2   0   42.32    1.52
  -5   2   0   42.59    1.47
   5  -2   0   44.63    1.41
   5  -2   0   45.32    1.46
   5  -2   0   43.33    1.45
   5  -2   0   43.50    1.47
   5   2   0   44.10    1.57
  -5  -2   0   44.94    1.57
   5  -2   0   40.07    1.90
  -5  -2   0   43.04    1.44
  -5   2   0   43.78    1.45
   5  -2   0   44.65    1.51
   6  -2   0   26.33    1.23
   6   2   0   26.75    1.01
  -6   2   0   26.33    0.98
  -6  -2   0   27.09    0.98
   6   2   0   26.80    0.94
   6   2   0   27.25    0.96
  -6  -2   0   27.40    1.11
  -6  -2   0   26.46    0.94
   6   2   0   24.84    1.56
   6  -2   0   24.79    0.97
   6   2   0   26.14    1.09
  -6  -2   0   26.13    1.04
  -6  -2   0   25.67    1.29
  -6   2   0   26.99    0.98
   6   2   0   26.94    0.97
   6  -2   0   23.66    1.51
   6   2   0   26.63    1.23
   6  -2   0   21.71    1.17
  -6   2   0   28.41    1.00
  -6   2   0   25.84    1.06
  -6   2   0   27.78    0.96
   6  -2   0   27.33    0.92
   6  -2   0   25.81    1.00
   6  -2   0   27.84    0.97
   6  -2   0   26.40    0.95
   6  -2   0   26.97    0.98
  -6  -2   0   25.80    1.07
  -6   2   0   25.24    1.06
  -6  -2   0   26.25    0.97
  -6   2   0   27.44    1.01
   6   2   0   27.10    1.00
  -6  -2   0   26.87    0.98
   6   2   0   24.92    1.11
  -6   2   0   25.53    1.30
  -7   2   0    1.83    0.42
   7   2   0    0.86    0.32
   7  -2   0    0.88    0.76
  -7  -2   0    1.15    0.30
   7   2   0    1.46    0.33
  -7   2   0    0.85    0.36
   7   2   0    1.69    0.45
   7   2   0    1.56    0.27
   7  -2   0    1.59    0.34
  -7  -2   0    0.96    0.26
  -7  -2   0    1.43    0.25
  -7   2   0    1.53    0.27
  -7   2   0    1.62    0.31
  -7  -2   0    1.99    0.46
   7  -2   0    1.76    0.31
   7  -2   0    1.18    0.32
  -7   2   0    1.05    0.45
   7  -2   0    1.58    0.24
   7   2   0    1.78    0.52
  -7  -2   0    0.72    0.43
  -7   2   0    1.43    0.27
  -7   2   0    1.89    0.36
   7  -2   0    1.48    0.27
   7   2   0    1.00    0.80
   7   2   0    1.25    0.28
  -7  -2   0    1.07    0.37
  -7  -2   0    1.34    0.29
   7   2   0    0.94    0.24
  -7  -2   0    1.54    0.40
   8  -2   0    3.74    0.40
  -8   2   0    2.79    0.59
  -8  -2   0    4.56    0.40
   8   2   0    4.04    0.46
  -8   2   0    4.23    0.52
  -8   2   0    4.56    0.46
   8   2   0    4.54    0.57
   8   2   0    3.79    0.41
   8   2   0    2.84    1.04
  -8   2   0    4.64    0.55
  -8  -2   0    4.72    0.54
  -8  -2   0    3.89    0.43
  -8   2   0    4.32    0.42
   8  -2   0    3.57    0.43
  -8  -2   0    3.25    0.60
  -8  -2   0    3.33    0.45
  -8   2   0    3.66    0.47
   8  -2   0    3.87    1.06
  -8   2   0    4.66    0.67
   8  -2   0    4.40    0.47
   8  -2   0    4.10    0.52
   8  -2   0    4.64    0.38
  -8  -2   0    5.00    0.57
   8   2   0    3.30    0.45
  -9  -2   0   39.08    1.43
   9   2   0   42.42    1.52
   9   2   0   40.39    1.51
   9   2   0   39.51    1.65
  -9  -2   0   40.69    1.62
  -9  -2   0   40.88    1.47
  -9   2   0   40.80    1.48
  -9  -2   0   40.45    1.65
  -9  -2   0   40.32    2.02
  -9   2   0   39.70    1.48
   9  -2   0   40.08    1.52
   9  -2   0   40.12    1.53
   9  -2   0   37.90    2.42
   9   2   0   41.18    1.42
   9  -2   0   39.72    1.65
  -9   2   0   38.54    1.60
   9  -2   0   41.99    1.38
  -9   2   0   41.45    1.65
  -9   2   0   39.67    1.53
  -9   2   0   41.18    2.03
   9   2   0   38.80    2.46
  -9   2   0   40.23    1.65
  -9  -2   0   41.15    1.47
   9  -2   0   39.32    1.43
 -10   2   0   52.34    1.91
 -10  -2   0   53.67    1.91
  10   2   0   53.94    2.11
 -10   2   0   56.60    2.14
 -10  -2   0   54.91    2.53
  10  -2   0   53.16    1.99
  10  -2   0   54.06    1.96
  10   2   0   54.35    3.02
  10   2   0   52.37    2.01
 -10  -2   0   54.73    2.13
  10  -2   0   55.97    3.08
 -10   2   0   54.52    2.11
  10   2   0   54.61    1.86
 -10   2   0   55.12    2.54
 -10  -2   0   55.47    2.09
  10   2   0   56.59    1.96
 -10   2   0   53.71    1.93
 -10  -2   0   53.85    1.91
  10  -2   0   52.97    1.87
 -11   2   0    9.99    1.06
 -11  -2   0   10.18    1.07
 -11  -2   0    8.63    1.01
 -11   2   0    9.68    0.99
  11   2   0    9.99    0.82
 -11  -2   0    8.53    1.46
 -11   2   0    9.60    0.78
 -11  -2   0   10.21    0.76
  11   2   0   10.95    2.07
  11  -2   0    9.53    0.82
  11  -2   0   11.94    2.10
  11  -2   0    9.96    0.88
  11   2   0   10.15    1.01
 -12   2   0   20.81    1.28
  12  -2   0   22.89    1.29
 -12  -2   0   23.30    1.44
 -12   2   0   24.76    1.45
 -12  -2   0   23.47    1.12
  12   2   0   22.80    1.26
  12  -2   0   26.08    2.73
  12   2   0   26.38    2.65
  12   2   0   24.58    1.44
 -12  -2   0   22.45    1.98
 -12  -2   0   23.56    1.47
  12  -2   0   23.00    1.20
 -12   2   0   23.80    1.49
 -13   2   0   -0.54    0.81
  13   2   0    0.09    0.52
 -13  -2   0   -0.01    0.52
 -13  -2   0    0.17    0.91
 -13  -2   0    1.06    0.74
 -13   2   0    1.75    0.86
  13  -2   0    2.55    1.61
  13   2   0    2.56    1.73
 -13   2   0    0.88    0.53
 -13  -2   0    0.55    0.81
  13  -2   0    1.17    0.58
 -14  -2   0   16.64    2.21
 -14  -2   0   18.85    1.51
 -14   2   0   17.53    1.17
 -14  -2   0   17.68    1.63
 -14   2   0   23.11    1.68
 -14   2   0   18.74    1.59
  14   2   0   18.68    1.09
  14  -2   0   19.02    1.16
   0   3   0    0.27    0.14
   0   3   0    0.32    0.15
   0  -3   0    0.32    0.15
   0  -3   0    0.30    0.13
   0   3   0    0.56    0.17
   0   3   0    0.23    0.13
   0  -3   0    0.28    0.17
   0   3   0    0.23    0.14
  -1   3   0   12.57    0.49
   1  -3   0   12.53    0.50
   1  -3   0   12.35    0.47
  -1  -3   0   11.96    0.48
   1   3   0   12.46    0.55
  -1   3   0   11.95    0.44
   1   3   0   12.79    0.49
   1  -3   0   11.89    0.49
  -1  -3   0   13.33    0.45
  -1  -3   0   13.14    0.59
   1   3   0   12.24    0.47
   1   3   0   12.19    0.47
   1  -3   0   12.53    0.50
   1  -3   0   13.01    0.49
   1   3   0   11.64    0.49
  -1  -3   0   12.92    0.48
  -1  -3   0   12.30    0.49
  -1   3   0   12.65    0.49
   1   3   0   14.11    0.42
   1   3   0   13.38    0.61
  -1  -3   0   11.51    0.41
  -1   3   0   12.48    0.51
  -1  -3   0   12.35    0.49
  -3   3   0  433.14   13.42
   3   3   0  439.95   13.41
   3   3   0  429.63   13.41
   3   3   0  423.02   13.48
  -3   3   0  426.08   13.44
   3  -3   0  423.95   13.42
  -3  -3   0  428.99   13.54
   3  -3   0  437.99   13.42
   3   3   0  455.62   13.43
  -3  -3   0  434.27   13.41
  -3  -3   0  429.06   13.41
  -3   3   0  418.60   13.45
   3  -3   0  426.28   13.43
   3  -3   0  408.69   13.66
   3  -3   0  429.27   13.43
  -3  -3   0  435.34   13.42
  -3   3   0  424.05   13.44
  -3  -3   0  445.00   13.49
   3   3   0  441.35   13.55
   3   3   0  457.82   13.47
  -3   3   0  442.45   13.44
   3  -3   0  437.32   13.44
  -3  -3   0  432.86   13.42
   3  -3   0  451.80   13.55
  -3   3   0  429.49   13.42
  -3   3   0  443.42   13.69
  -3  -3   0  420.97   13.42
   3   3   0  437.55   13.42
  -4   3   0    9.89    0.54
   4  -3   0   10.34    0.54
  -4   3   0   10.48    0.50
  -4  -3   0   10.82    0.51
  -4   3   0   11.57    0.52
  -4   3   0   10.98    0.46
  -4   3   0   10.25    0.92
  -4   3   0   10.71    0.40
   4  -3   0   10.35    0.48
  -4  -3   0   10.65    0.48
   4   3   0   11.11    0.49
  -4  -3   0   10.63    0.49
   4   3   0   10.35    0.47
  -4  -3   0   10.79    0.47
   4  -3   0    8.44    0.99
   4  -3   0   10.64    0.49
  -4   3   0   10.65    0.51
  -4  -3   0    9.62    0.82
   4   3   0   10.15    0.50
   4   3   0   10.58    0.47
  -4  -3   0   10.54    0.49
  -4  -3   0    9.38    0.60
   4  -3   0   11.00    0.72
  -4   3   0   10.42    0.49
  -4  -3   0   10.87    0.63
   4  -3   0   11.44    0.40
   4  -3   0   10.86    0.51
   4  -3   0    9.75    0.44
   4  -3   0   10.60    0.52
  -4   3   0    9.68    0.63
   4   3   0   10.91    0.71
   4   3   0   10.17    0.61
   5   3   0    4.77    0.35
  -5   3   0    4.42    0.47
  -5   3   0    4.48    0.86
   5  -3   0    4.88    0.39
   5  -3   0    5.27    0.39
   5   3   0    4.37    0.44
  -5   3   0    5.21    0.40
   5   3   0    5.30    0.43
  -5  -3   0    4.68    0.37
  -5  -3   0    4.85    0.39
  -5  -3   0    5.19    0.35
  -5  -3   0    4.65    0.67
  -5  -3   0    4.94    0.40
  -5   3   0    4.37    0.49
  -5   3   0    5.46    0.37
  -5   3   0    5.20    0.42
  -5   3   0    4.99    0.40
  -5  -3   0    4.55    0.47
   5  -3   0    5.58    0.44
  -5  -3   0    5.24    0.48
   5  -3   0    5.14    0.46
   5   3   0    3.46    0.54
   5   3   0    4.82    0.54
   5  -3   0    4.91    0.64
   5   3   0    4.49    0.61
   5  -3   0    5.38    0.59
  -5   3   0    4.85    0.40
   5  -3   0    4.17    0.35
   5  -3   0    5.09    0.27
  -5  -3   0    5.59    0.54
   5  -3   0    3.46    0.86
   5  -3   0    4.34    0.37
   6   3   0    4.07    0.65
  -6  -3   0    4.76    0.45
   6   3   0    3.34    0.35
  -6   3   0    3.51    0.42
  -6  -3   0    3.67    0.36
   6  -3   0    2.95    0.34
  -6   3   0    4.05    0.44
  -6   3   0    3.94    0.39
  -6   3   0    4.27    0.53
  -6   3   0    3.94    0.38
   6  -3   0    2.87    0.35
   6   3   0    3.80    0.44
  -6  -3   0    3.25    0.40
  -6  -3   0    4.05    0.56
   6   3   0    3.77    0.44
   6  -3   0    5.42    0.66
   6  -3   0    4.62    0.48
   6  -3   0    3.25    0.46
   6  -3   0    3.51    0.64
   6  -3   0    3.46    0.38
   6   3   0    3.38    0.55
  -6   3   0    3.93    0.40
  -6  -3   0    3.81    0.42
  -6  -3   0    3.81    0.47
   6  -3   0    2.85    0.39
  -6  -3   0    3.80    0.74
   6  -3   0    3.72    0.77
  -6   3   0    3.75    0.40
  -6  -3   0    3.52    0.39
   6  -3   0    4.09    0.27
  -6   3   0    3.83    0.89
  -7   3   0   29.87    1.10
  -7  -3   0   29.89    1.10
  -7   3   0   28.79    1.22
  -7  -3   0   28.35    1.46
  -7  -3   0   28.61    1.21
  -7   3   0   29.50    1.10
  -7  -3   0   29.04    1.17
  -7  -3   0   30.23    1.27
   7  -3   0   30.21    0.99
   7  -3   0   28.52    1.13
  -7  -3   0   30.34    1.09
  -7   3   0   29.35    1.21
   7   3   0   27.66    1.81
  -7  -3   0   31.07    1.16
   7  -3   0   30.01    1.07
   7  -3   0   28.85    1.07
  -7  -3   0   29.46    1.09
   7   3   0   28.67    1.05
   7   3   0   29.14    1.26
   7   3   0   30.17    1.13
  -7   3   0   28.91    1.11
   7   3   0   29.52    1.15
   7  -3   0   25.96    1.75
   8  -3   0  311.00    9.24
  -8   3   0  298.15    9.43
   8   3   0  291.28   10.07
   8  -3   0  299.03    9.35
   8   3   0  301.14    9.33
   8  -3   0  280.72   10.00
  -8  -3   0  300.49    9.39
  -8   3   0  296.08    9.42
  -8  -3   0  302.87    9.30
  -8  -3   0  295.12    9.69
  -8   3   0  300.50    9.35
  -8   3   0  301.28    9.32
   8  -3   0  287.73    9.43
   8   3   0  295.52    9.47
   8   3   0  304.53    9.38
   8   3   0  309.66    9.30
  -8  -3   0  303.24    9.33
  -8  -3   0  302.05    9.31
  -8   3   0  296.62    9.34
  -8  -3   0  286.73    9.43
   8  -3   0  296.14    9.31
  -8   3   0  289.76    9.42
   9   3   0    5.04    0.46
  -9   3   0    4.72    0.56
   9  -3   0    3.48    1.14
  -9  -3   0    4.10    0.50
   9  -3   0    4.30    0.64
  -9  -3   0    3.71    0.68
   9   3   0    4.88    0.68
  -9  -3   0    5.20    0.60
  -9   3   0    5.13    0.61
  -9  -3   0    5.01    0.63
  -9   3   0    4.08    0.56
   9  -3   0    4.23    0.56
  -9  -3   0    4.54    0.57
   9  -3   0    4.04    0.46
  -9   3   0    4.13    0.59
  -9   3   0    4.42    0.52
  -9   3   0    5.96    0.67
   9   3   0    3.03    1.17
   9  -3   0    4.34    0.55
  -9  -3   0    4.59    0.48
   9  -3   0    4.27    0.31
   9   3   0    5.03    0.65
 -10   3   0  622.22   19.30
 -10   3   0  617.64   19.26
 -10  -3   0  626.09   19.38
  10   3   0  633.05   19.27
  10  -3   0  620.46   19.25
 -10   3   0  628.12   19.42
 -10  -3   0  614.54   19.24
 -10  -3   0  616.97   19.43
  10  -3   0  608.82   19.30
 -10  -3   0  628.93   19.76
 -10   3   0  618.72   19.41
  10  -3   0  601.61   20.19
  10   3   0  621.70   20.26
  10   3   0  603.31   19.43
  10  -3   0  610.09   19.29
  10   3   0  615.64   19.39
  10   3   0  641.30   19.24
 -10  -3   0  625.05   19.30
 -11  -3   0   45.95    1.65
  11   3   0   44.87    1.70
 -11   3   0   44.79    1.67
 -11  -3   0   44.57    1.88
  11   3   0   45.64    2.96
  11   3   0   42.78    1.89
 -11  -3   0   43.07    1.91
  11  -3   0   45.06    1.72
 -11   3   0   44.70    1.90
 -11   3   0   43.65    1.91
  11  -3   0   44.60    2.91
 -11  -3   0   44.52    2.36
  11  -3   0   42.52    1.73
 -12  -3   0   -0.07    0.78
  12  -3   0   -0.41    0.50
 -12   3   0   -0.22    0.74
  12   3   0    2.01    1.48
  12   3   0    1.92    0.74
 -12  -3   0   -0.06    0.70
  12  -3   0    2.51    1.50
  12   3   0   -0.32    0.60
 -12   3   0   -0.26    0.47
 -12  -3   0   -0.04    0.48
 -12   3   0   -0.50    0.70
 -12  -3   0    0.28    0.66
 -13  -3   0    0.53    0.84
  13   3   0    0.54    0.53
 -13   3   0    0.94    0.79
 -13   3   0    1.07    0.87
 -13  -3   0   -0.43    0.51
  13  -3   0    0.42    0.56
  13  -3   0    3.63    1.80
 -13  -3   0    1.42    0.76
 -13  -3   0   -0.41    0.92
  13   3   0    2.66    1.72
  13   3   0    2.12    0.86
 -13   3   0    0.71    0.56
 -14   3   0   17.54    1.50
 -14  -3   0   19.71    1.48
  14   3   0   12.38    1.07
 -14  -3   0   15.81    2.12
 -14  -3   0   17.18    1.59
 -14   3   0   15.78    1.15
 -14   3   0   15.79    1.58
  14  -3   0   14.58    1.10
  -1   4   0  509.05   15.77
  -1   4   0  505.60   15.79
   1  -4   0  511.68   15.79
  -1  -4   0  499.31   15.77
  -1   4   0  526.17   15.96
  -2  -4   0  139.20    4.29
   2  -4   0  140.03    4.28
   2  -4   0  133.08    4.30
  -2   4   0  137.94    4.28
  -2  -4   0  136.71    4.27
  -2  -4   0  137.79    4.34
  -2  -4   0  135.28    4.39
   2  -4   0  132.70    4.52
   2   4   0  139.49    4.39
   2   4   0  133.09    4.27
   2   4   0  135.81    4.29
   2  -4   0  140.07    4.29
   2   4   0  130.27    4.34
  -2   4   0  131.96    4.28
  -2  -4   0  141.42    4.27
  -2  -4   0  132.81    4.24
  -2   4   0  134.67    4.30
   2   4   0  135.92    4.27
   2   4   0  142.25    4.29
  -2   4   0  133.06    4.28
  -2   4   0  141.15    4.29
  -2   4   0  138.13    4.23
  -2  -4   0  130.55    4.28
   2  -4   0  141.19    4.30
  -2  -4   0  158.41    4.28
   2   4   0  136.61    4.27
  -2   4   0  134.07    4.30
   2  -4   0  123.27    4.30
   3  -4   0  229.63    7.02
  -3   4   0  218.71    7.01
   3   4   0  238.60    7.15
  -3   4   0  224.93    6.97
   3   4   0  218.34    7.08
   3   4   0  225.26    6.99
  -3  -4   0  235.99    7.01
  -3   4   0  222.45    7.00
  -3  -4   0  230.12    7.08
  -3   4   0  222.67    6.95
   3   4   0  228.02    7.01
  -3  -4   0  225.26    6.99
  -3  -4   0  220.95    7.13
   3  -4   0  221.09    7.00
   3  -4   0  241.66    7.01
  -3   4   0  225.48    7.00
   3  -4   0  229.11    7.01
   3  -4   0  223.38    7.02
  -3   4   0  219.14    7.02
   3   4   0  224.53    7.01
  -3   4   0  216.58    7.02
  -3   4   0  224.93    7.29
  -3   4   0  230.92    7.02
   3  -4   0  212.06    6.95
   3  -4   0  217.25    7.28
   3   4   0  225.94    6.99
  -3  -4   0  217.98    6.98
  -4   4   0    0.57    0.33
   4   4   0    0.31    0.22
  -4   4   0    0.61    0.13
   4  -4   0    0.26    0.20
   4   4   0    0.14    0.18
   4  -4   0    0.12    0.24
   4   4   0    0.38    0.19
  -4  -4   0    0.98    0.34
   4  -4   0    0.51    0.21
  -4  -4   0    0.22    0.19
   4  -4   0   -0.36    0.51
   4  -4   0    0.55    0.26
  -4   4   0    0.06    0.49
  -4  -4   0    0.15    0.20
  -4   4   0    0.41    0.21
  -4   4   0    0.13    0.24
  -4  -4   0   -0.01    0.19
  -4   4   0    0.49    0.23
   4   4   0    0.22    0.35
  -4   4   0    0.29    0.24
   4   4   0   -0.07    0.19
   4   4   0    0.27    0.27
  -4  -4   0    0.07    0.30
  -4  -4   0    0.18    0.20
   4  -4   0    0.32    0.28
   4  -4   0    0.40    0.17
  -4  -4   0    0.77    0.21
   5   4   0   55.00    1.82
   5   4   0   58.33    1.82
  -5   4   0   54.44    1.77
  -5   4   0   54.03    1.83
   5   4   0   55.86    1.79
   5   4   0   55.92    2.04
  -5  -4   0   53.20    2.05
  -5  -4   0   55.86    1.81
   5   4   0   55.10    1.79
  -5   4   0   54.49    1.82
   5  -4   0   56.77    1.82
   5  -4   0   50.45    2.26
   5  -4   0   54.67    1.81
  -5  -4   0   55.65    1.94
  -5  -4   0   53.10    1.88
  -5   4   0   55.63    1.84
   5  -4   0   54.60    1.84
  -5   4   0   52.94    1.86
   5  -4   0   52.06    1.97
   5  -4   0   55.84    1.86
  -5   4   0   54.94    2.29
  -5  -4   0   53.77    1.80
  -5  -4   0   54.63    1.81
   5  -4   0   53.07    1.77
  -5   4   0   53.67    1.88
  -5  -4   0   55.39    1.82
   5  -4   0   55.93    2.04
   5   4   0   54.03    1.94
  -5  -4   0   55.28    1.79
   6   4   0  273.72    8.33
   6  -4   0  266.91    8.35
   6   4   0  267.80    8.35
   6  -4   0  252.98    8.32
   6  -4   0  269.54    8.35
  -6  -4   0  266.87    8.34
   6  -4   0  252.70    8.37
  -6  -4   0  278.10    8.36
  -6   4   0  258.83    8.35
  -6   4   0  273.29    8.38
  -6  -4   0  265.77    8.61
  -6   4   0  269.95    8.38
   6   4   0  272.29    8.33
  -6  -4   0  261.93    8.37
   6   4   0  305.33    8.50
  -6   4   0  261.17    8.41
   6   4   0  265.41    8.36
   6  -4   0  272.08    8.38
   6   4   0  256.27    8.47
   6   4   0  271.23    8.42
  -6  -4   0  270.92    8.36
  -6   4   0  269.89    8.33
  -6  -4   0  270.04    8.33
  -6  -4   0  272.18    8.48
  -6   4   0  256.72    8.42
  -6   4   0  270.02    8.35
  -6  -4   0  265.02    8.43
   6  -4   0  246.69    8.83
   6  -4   0  266.37    8.40
  -7  -4   0    3.01    0.54
   7  -4   0    3.89    0.44
   7   4   0    3.82    0.52
  -7  -4   0    4.89    0.57
  -7   4   0    4.35    0.48
  -7   4   0    4.48    0.48
   7  -4   0    4.43    0.40
  -7   4   0    3.93    0.44
  -7   4   0    5.65    0.55
   7   4   0    4.98    0.41
  -7   4   0    3.71    0.39
   7   4   0    4.94    0.68
   7   4   0    3.96    0.99
   7   4   0    4.66    0.52
  -7   4   0    3.89    0.48
   7   4   0    4.18    0.40
  -7  -4   0    4.87    0.61
  -7  -4   0    4.34    0.44
  -7  -4   0    3.75    0.39
   7  -4   0    4.41    0.53
   7   4   0    5.25    0.70
   7  -4   0    3.81    0.38
   7  -4   0    3.69    0.92
  -7  -4   0    4.21    0.48
  -8  -4   0    0.68    0.41
  -8  -4   0    0.49    0.48
  -8  -4   0    0.61    0.33
  -8   4   0    1.41    0.46
   8   4   0    1.11    0.36
   8   4   0    0.42    0.27
  -8  -4   0    0.66    0.30
  -8  -4   0    0.05    0.26
   8   4   0    0.50    0.40
   8  -4   0    0.33    0.30
   8  -4   0    0.56    0.29
  -8   4   0    0.21    0.33
   8  -4   0    0.24    0.51
   8   4   0    0.05    0.92
  -8   4   0    0.05    0.33
   8  -4   0    0.58    0.27
   8   4   0    1.19    0.53
  -8   4   0    0.90    0.29
  -8   4   0    0.82    0.46
  -8   4   0    0.88    0.32
  -8  -4   0    0.74    0.43
   8  -4   0   -0.25    0.88
   8   4   0   -0.23    0.25
  -9   4   0    1.04    0.37
   9   4   0    1.58    0.30
  -9   4   0    0.98    0.53
  -9  -4   0    1.35    0.37
   9  -4   0    1.31    0.42
  -9   4   0    1.68    0.40
   9   4   0    1.03    0.42
  -9   4   0    0.95    0.32
   9  -4   0    1.33    0.35
  -9  -4   0    0.73    0.29
  -9  -4   0    1.07    0.31
  -9   4   0    1.65    0.53
   9   4   0    1.20    0.38
  -9  -4   0    1.05    0.48
   9   4   0    1.23    0.31
  -9   4   0    1.36    0.38
   9   4   0    1.48    0.59
  -9  -4   0    1.04    0.48
  -9  -4   0    1.02    0.59
   9  -4   0    0.52    0.99
   9  -4   0    1.03    0.29
   9   4   0    1.58    1.12
 -10   4   0   47.21    1.73
  10   4   0   47.75    2.91
  10   4   0   46.54    1.95
 -10   4   0   47.95    1.91
 -10  -4   0   46.62    1.91
  10   4   0   46.41    1.63
 -10  -4   0   47.47    1.69
  10  -4   0   45.38    1.70
  10   4   0   47.00    1.73
 -10  -4   0   48.60    1.89
  10  -4   0   44.03    1.64
 -10   4   0   47.98    1.95
 -10  -4   0   46.59    2.30
  10  -4   0   47.41    2.88
 -10   4   0   45.25    1.71
  10  -4   0   44.87    1.76
 -11   4   0   12.89    0.88
  11   4   0   13.77    2.22
 -11  -4   0   11.15    1.55
 -11  -4   0   14.05    1.12
  11   4   0   13.21    1.16
  11  -4   0   14.20    2.18
 -11  -4   0   13.82    0.83
 -11   4   0   12.58    1.12
  11  -4   0   12.88    0.85
 -11   4   0   12.80    1.14
 -11  -4   0   13.88    1.12
  11   4   0   12.39    0.90
  11  -4   0   12.51    0.89
  12  -4   0    1.87    1.47
 -12  -4   0    2.45    0.74
 -12   4   0    0.81    0.73
 -12   4   0    0.92    0.77
  12  -4   0    0.72    0.52
 -12  -4   0    0.27    0.69
 -12  -4   0    0.26    0.77
 -12  -4   0    0.33    0.57
  12   4   0    1.75    1.56
  12   4   0    0.51    0.98
 -12   4   0    0.55    0.49
  12   4   0    0.69    0.81
  13   4   0   53.64    2.38
 -13  -4   0   51.95    2.36
 -13  -4   0   53.57    2.98
 -13   4   0   54.53    2.36
  13   4   0   53.93    2.03
  13  -4   0   52.96    2.07
 -13  -4   0   55.29    2.00
  13  -4   0   56.73    3.75
 -13   4   0   51.34    2.41
 -13  -4   0   53.91    2.34
 -13   4   0   53.61    2.05
  13   4   0   57.02    3.78
 -14   4   0    4.06    0.99
  14  -4   0    3.58    0.67
  14   4   0    6.22    1.10
 -14  -4   0    3.46    1.08
 -14  -4   0    3.44    1.01
  14   4   0    2.84    1.01
 -14   4   0    3.90    0.68
 -14  -4   0    4.34    0.85
 -14   4   0    2.43    0.97
   0   5   0   -0.18    0.20
   0  -5   0    0.07    0.20
   0  -5   0    0.18    0.21
   0   5   0    0.53    0.31
   0   5   0    0.18    0.22
   0  -5   0    0.30    0.26
   0   5   0    0.21    0.24
   0  -5   0    0.25    0.19
   0   5   0   -0.03    0.19
   0   5   0    0.07    0.20
   0  -5   0    0.19    0.19
  -2  -5   0  673.83   20.10
   2  -5   0  635.00   20.10
  -2   5   0  652.24   20.34
  -2   5   0  654.37   20.11
   2   5   0  630.93   20.10
  -2  -5   0  654.70   20.15
   3  -5   0  238.33    7.15
   3  -5   0  227.66    7.15
   3   5   0  221.49    7.20
   3   5   0  240.18    7.13
  -3   5   0  218.97    7.12
   3  -5   0  229.16    7.13
  -3   5   0  229.29    7.09
   3  -5   0  234.73    7.13
  -3   5   0  237.19    7.13
  -3  -5   0  233.65    7.21
  -3   5   0  220.23    7.12
   3  -5   0  219.52    7.42
   3   5   0  214.02    7.12
   3   5   0  234.35    7.11
   3  -5   0  234.21    7.13
  -3  -5   0  228.82    7.13
  -3  -5   0  222.37    7.11
   3   5   0  230.43    7.11
  -3   5   0  227.19    7.14
  -3  -5   0  230.34    7.13
  -3   5   0  229.04    7.43
   3   5   0  229.30    7.13
  -3   5   0  220.23    7.15
   3   5   0  239.39    7.28
  -3  -5   0  222.74    7.11
  -3   5   0  231.94    7.15
  -3  -5   0  223.76    7.09
  -4  -5   0   36.76    1.35
   4   5   0   35.73    1.44
   4  -5   0   31.86    1.66
   4  -5   0   35.26    1.22
   4  -5   0   38.13    1.24
   4  -5   0   33.99    1.26
  -4  -5   0   36.56    1.23
  -4  -5   0   36.10    1.20
  -4  -5   0   33.84    1.43
  -4   5   0   35.00    1.25
   4   5   0   33.71    1.35
  -4  -5   0   34.38    1.23
   4  -5   0   34.82    1.13
  -4   5   0   34.80    1.66
  -4   5   0   34.99    1.24
   4   5   0   34.96    1.20
  -4  -5   0   34.04    1.19
   4  -5   0   35.73    1.44
   4  -5   0   35.74    1.24
  -4   5   0   35.28    1.13
   4   5   0   37.38    1.25
  -4   5   0   34.36    1.28
   4  -5   0   36.50    1.25
  -4   5   0   36.78    1.26
   4   5   0   36.03    1.21
   4   5   0   34.64    1.26
  -4   5   0   37.19    1.16
  -4   5   0   33.92    1.24
  -4   5   0   36.47    1.23
   5   5   0    0.35    0.32
  -5   5   0    0.71    0.31
  -5   5   0    0.66    0.12
   5  -5   0    0.75    0.18
  -5  -5   0    0.51    0.22
  -5  -5   0    0.67    0.23
   5  -5   0    0.85    0.24
   5   5   0    0.67    0.21
  -5   5   0    0.80    0.17
   5   5   0    0.34    0.27
   5   5   0    0.90    0.32
   5   5   0    1.62    0.41
  -5   5   0    0.52    0.23
  -5   5   0    0.48    0.56
  -5   5   0    0.45    0.24
  -5   5   0    0.42    0.26
   5  -5   0   -0.15    0.58
  -5  -5   0    0.43    0.20
  -5  -5   0    0.49    0.37
   5  -5   0    0.23    0.30
  -5  -5   0    0.41    0.23
   5  -5   0    0.60    0.28
  -5  -5   0    0.59    0.25
   5  -5   0    0.42    0.29
  -5  -5   0    0.28    0.31
   5  -5   0    0.46    0.22
  -5   5   0    0.44    0.29
   5   5   0    0.48    0.21
   5   5   0    0.11    0.20
   5  -5   0    0.59    0.24
  -5   5   0    0.81    0.26
  -6  -5   0   58.10    1.94
   6   5   0   58.70    1.97
  -6  -5   0   58.09    2.25
   6  -5   0   56.29    1.99
   6  -5   0   57.98    1.89
  -6  -5   0   58.91    1.92
   6  -5   0   59.25    2.00
  -6   5   0   60.66    2.00
   6   5   0   53.55    2.05
   6  -5   0   53.46    2.49
   6  -5   0   61.32    1.98
  -6   5   0   59.32    2.02
  -6  -5   0   57.92    2.03
  -6  -5   0   58.38    2.11
   6   5   0   55.25    2.10
   6   5   0   58.52    1.94
   6   5   0   58.08    1.92
  -6   5   0   58.53    2.03
  -6   5   0   58.20    1.97
   6   5   0   59.13    2.04
   6   5   0   58.68    1.92
  -6  -5   0   60.42    1.95
  -6   5   0   56.02    1.96
   6  -5   0   59.85    1.96
  -6  -5   0   58.54    1.95
  -6   5   0   60.58    1.96
  -6  -5   0   56.86    1.96
   6  -5   0   59.26    1.94
   7  -5   0   21.12    0.89
   7   5   0   20.08    1.08
   7  -5   0   20.58    0.79
  -7   5   0   20.99    0.79
  -7  -5   0   20.10    1.00
  -7  -5   0   20.74    0.88
   7   5   0   20.31    0.96
   7  -5   0   20.88    0.95
   7  -5   0   21.65    0.85
   7   5   0   21.03    0.92
  -7  -5   0   20.64    1.26
  -7  -5   0   21.59    0.94
  -7   5   0   20.80    1.03
  -7   5   0   20.72    1.00
   7  -5   0   18.74    1.60
   7   5   0   20.81    0.85
   7   5   0   23.96    1.09
   7   5   0   20.29    0.83
  -7   5   0   21.55    0.89
  -7  -5   0   21.04    0.87
  -7   5   0   20.55    0.90
  -7  -5   0   21.26    0.82
  -7   5   0   21.23    0.89
   8  -5   0  443.85   14.24
  -8   5   0  458.38   14.32
  -8  -5   0  458.54   14.25
  -8  -5   0  458.97   14.26
  -8   5   0  460.70   14.37
   8  -5   0  440.99   15.00
   8   5   0  468.11   14.29
   8   5   0  448.37   14.44
  -8   5   0  445.48   14.38
   8  -5   0  480.25   14.32
   8   5   0  454.78   14.38
  -8   5   0  475.97   14.29
   8   5   0  470.39   14.28
   8   5   0  452.88   15.07
  -8  -5   0  460.94   14.33
   8  -5   0  457.87   14.27
   8  -5   0  454.53   14.32
   8   5   0  467.06   14.25
  -8  -5   0  451.18   14.39
  -8   5   0  459.46   14.25
  -8  -5   0  461.15   14.29
  -8   5   0  453.48   14.28
  -8  -5   0  464.02   14.66
   9  -5   0   14.50    0.66
   9  -5   0   10.81    1.76
  -9   5   0   12.74    0.98
  -9   5   0   14.34    0.98
   9   5   0   14.38    1.09
  -9   5   0   14.08    0.79
  -9  -5   0   13.63    1.34
  -9  -5   0   13.90    0.78
   9   5   0   13.79    1.81
   9   5   0   13.52    0.69
  -9  -5   0   12.74    0.95
  -9   5   0   13.94    0.71
  -9  -5   0   14.52    0.94
  -9  -5   0   13.71    0.68
  -9   5   0   14.09    0.75
  -9   5   0   13.73    0.81
   9  -5   0   13.05    0.77
   9  -5   0   14.25    0.86
   9   5   0   13.47    0.69
  -9  -5   0   14.57    0.74
   9  -5   0   14.55    0.70
   9   5   0   12.98    0.83
  10  -5   0   77.85    2.65
 -10  -5   0   76.10    2.72
 -10  -5   0   75.80    3.19
  10  -5   0   76.34    3.73
  10   5   0   73.35    2.83
 -10   5   0   76.64    2.61
  10   5   0   76.97    2.53
 -10   5   0   76.40    2.61
 -10   5   0   76.81    2.80
 -10   5   0   76.98    2.77
  10   5   0   76.50    2.62
  10  -5   0   74.27    2.55
 -10  -5   0   76.20    2.78
  10   5   0   76.45    3.78
 -10  -5   0   77.55    2.58
  11   5   0    3.63    0.75
  11   5   0    1.86    0.53
 -11   5   0    2.96    0.75
 -11  -5   0    3.04    0.48
 -11  -5   0    4.05    0.73
  11  -5   0    3.33    1.32
  11   5   0    2.72    1.43
 -11  -5   0    4.24    0.70
 -11   5   0    3.09    0.53
 -11  -5   0    2.95    0.78
  11  -5   0    2.64    0.56
  11  -5   0    3.10    0.76
 -11   5   0    4.10    0.72
 -12  -5   0   54.43    2.37
 -12  -5   0   58.75    2.32
  12   5   0   57.23    2.44
 -12   5   0   58.08    2.35
 -12   5   0   56.96    2.09
  12   5   0   58.41    3.66
 -12  -5   0   56.82    2.87
  12  -5   0   59.71    3.58
  12  -5   0   57.42    2.14
 -12   5   0   57.06    2.41
  12   5   0   51.86    2.47
 -13   5   0    1.21    0.58
 -13  -5   0    1.66    0.56
  13   5   0    1.93    0.62
  13   5   0    3.84    0.91
 -13   5   0    0.87    0.89
 -13  -5   0    0.97    0.91
 -13   5   0    4.11    0.93
  13  -5   0    4.21    1.79
 -13  -5   0    2.81    0.87
  13   5   0    3.57    1.88
 -13  -5   0    2.19    0.86
  13  -5   0    2.18    0.61
  14   5   0   20.30    1.67
  14   5   0   22.61    2.89
 -14   5   0   17.70    1.27
 -14  -5   0   17.30    1.63
 -14   5   0   19.11    1.63
 -14   5   0   20.34    1.64
 -14  -5   0   19.43    2.40
  14  -5   0   17.65    1.23
 -14  -5   0   22.13    1.92
   0  -6   0  117.34    3.73
   0  -6   0  113.79    3.73
   0  -6   0  120.32    3.76
   0   6   0  123.87    3.74
   0   6   0  113.28    3.73
   0   6   0  128.00    3.86
   0   6   0  112.47    3.75
   0  -6   0  117.73    3.75
   0  -6   0  122.46    3.86
   0   6   0  113.92    3.75
   1  -6   0  531.17   16.11
   1   6   0  527.29   16.08
   1   6   0  500.73   16.09
  -1  -6   0  517.16   16.10
   1   6   0  487.94   16.09
   1   6   0  537.71   16.19
   1   6   0  523.09   16.08
  -1  -6   0  496.83   16.08
  -1  -6   0  530.30   16.10
   1  -6   0  499.88   16.10
   1  -6   0  510.62   16.08
  -1   6   0  554.88   16.37
   1   6   0  497.29   16.12
   1  -6   0  513.88   16.08
  -1  -6   0  528.83   16.13
  -1   6   0  550.56   16.09
  -1  -6   0  525.05   16.08
   2   6   0  155.20    5.11
   2  -6   0  162.31    5.03
   2   6   0  159.76    5.03
   2  -6   0  149.37    5.06
   2  -6   0  165.26    5.05
   2  -6   0  159.76    5.07
  -2   6   0  166.33    5.07
  -2   6   0  152.76    5.04
  -2   6   0  161.77    5.34
   2   6   0  153.19    5.03
  -2   6   0  169.70    5.05
  -2  -6   0  165.64    5.06
   2  -6   0  159.18    5.05
   2   6   0  152.48    5.05
  -2  -6   0  156.93    4.97
   2   6   0  157.99    5.00
  -2  -6   0  179.41    5.01
  -2  -6   0  163.15    5.06
   2  -6   0  162.99    5.38
  -2   6   0  158.18    5.07
  -2  -6   0  164.49    5.12
  -2  -6   0  164.83    5.18
   2   6   0  170.50    5.19
  -2  -6   0  156.93    5.04
  -2   6   0  155.51    4.99
  -2   6   0  154.97    5.03
   3  -6   0  189.35    5.94
  -3   6   0  189.33    5.98
  -3  -6   0  184.78    5.94
  -3   6   0  203.25    6.31
   3   6   0  184.45    5.96
   3  -6   0  198.29    5.98
  -3   6   0  195.87    5.95
   3  -6   0  191.37    5.95
  -3  -6   0  185.92    5.93
   3   6   0  181.79    5.95
   3   6   0  196.56    5.94
  -3   6   0  186.91    5.96
   3   6   0  170.34    5.93
  -3  -6   0  191.91    5.95
  -3  -6   0  200.04    5.97
  -3   6   0  192.55    5.95
   3   6   0  185.69    5.93
  -3   6   0  186.46    5.86
  -3   6   0  183.36    5.97
  -3  -6   0  187.41    5.92
  -3   6   0  187.90    5.94
  -3  -6   0  191.25    6.04
  -3  -6   0  197.77    5.94
   3  -6   0  193.45    5.96
  -4  -6   0  290.08    9.23
   4  -6   0  295.22    9.27
  -4   6   0  315.98    9.28
  -4  -6   0  303.69    9.25
   4   6   0  310.61    9.44
   4   6   0  307.39    9.26
  -4   6   0  291.22    9.25
   4  -6   0  279.34    9.27
  -4  -6   0  286.55    9.21
   4   6   0  298.32    9.23
   4   6   0  297.40    9.25
   4  -6   0  301.32    9.25
   4   6   0  303.54    9.26
  -4   6   0  304.68    9.25
  -4   6   0  302.02    9.65
  -4  -6   0  305.00    9.36
  -4   6   0  296.29    9.20
   4   6   0  283.80    9.35
  -4   6   0  286.80    9.27
   4  -6   0  288.53    9.24
  -4  -6   0  282.34    9.42
  -4   6   0  295.81    9.25
   4   6   0  304.92    9.23
   4  -6   0  303.20    9.25
   4  -6   0  284.48    9.64
  -4   6   0  294.70    9.28
   5  -6   0  139.29    4.55
   5  -6   0  143.74    4.53
   5   6   0  143.53    4.74
  -5  -6   0  142.25    4.52
   5  -6   0  142.78    4.52
   5   6   0  142.75    4.49
   5   6   0  149.46    4.56
  -5   6   0  140.50    4.56
  -5   6   0  149.79    4.55
   5  -6   0  131.84    4.96
  -5  -6   0  143.12    4.49
  -5  -6   0  144.77    4.50
   5  -6   0  133.73    4.67
  -5  -6   0  140.09    4.49
  -5   6   0  140.00    4.97
  -5  -6   0  144.14    4.64
   5   6   0  138.37    4.52
   5   6   0  149.68    4.52
  -5   6   0  142.21    4.42
   5   6   0  142.43    4.49
  -5   6   0  139.31    4.54
   5  -6   0  144.93    4.74
  -5  -6   0  139.14    4.74
   5  -6   0  143.46    4.54
  -5   6   0  143.76    4.52
  -5  -6   0  144.66    4.51
   5  -6   0  140.46    4.51
  -5   6   0  148.94    4.52
  -5   6   0  141.43    4.54
   5   6   0  136.80    4.64
  -6  -6   0   75.09    2.40
  -6  -6   0   73.70    2.40
   6   6   0   71.38    2.41
  -6   6   0   71.58    2.42
  -6   6   0   73.21    2.41
   6  -6   0   73.02    2.30
  -6  -6   0   73.84    2.40
   6   6   0   70.96    2.55
   6   6   0   74.48    2.44
   6   6   0   74.10    2.37
  -6  -6   0   74.44    2.37
   6   6   0   69.98    2.36
   6  -6   0   73.06    2.44
   6   6   0   72.65    2.48
   6  -6   0   77.13    2.43
  -6   6   0   75.79    2.41
  -6  -6   0   72.71    2.39
   6  -6   0   70.85    2.39
  -6  -6   0   71.55    2.69
  -6  -6   0   71.78    2.48
   6  -6   0   71.69    2.44
  -6   6   0   69.99    2.47
   6  -6   0   68.66    2.98
  -6   6   0   72.27    2.29
  -6   6   0   71.36    2.45
   7  -6   0   85.93    2.72
   7   6   0   80.65    2.80
   7  -6   0   76.01    3.38
  -7   6   0   86.45    2.70
   7   6   0   79.40    2.86
  -7  -6   0   80.90    2.68
  -7  -6   0   78.89    3.02
  -7   6   0   80.83    2.69
   7  -6   0   80.41    2.73
   7   6   0   82.09    2.79
   7  -6   0   81.34    2.59
  -7  -6   0   80.64    2.80
  -7   6   0   79.75    2.78
   7   6   0   81.31    2.70
  -7  -6   0   83.25    2.71
   7   6   0   81.92    2.65
  -7   6   0   82.48    2.71
  -7   6   0   79.08    2.75
  -7  -6   0   81.78    2.64
   7   6   0   80.50    2.67
  -7  -6   0   80.85    2.67
   7  -6   0   81.94    2.67
  -8   6   0  353.21   10.51
   8  -6   0  318.37   11.22
   8   6   0  338.97   10.51
  -8  -6   0  333.13   10.61
   8   6   0  333.58   10.49
  -8  -6   0  339.52   10.50
   8  -6   0  325.39   10.42
   8  -6   0  333.48   10.54
  -8   6   0  328.45   10.60
   8   6   0  338.03   10.47
  -8  -6   0  330.40   10.87
  -8  -6   0  335.11   10.46
  -8  -6   0  339.91   10.53
   8   6   0  320.85   10.66
   8  -6   0  350.64   10.54
  -8  -6   0  338.99   10.48
  -8   6   0  340.86   10.54
  -8   6   0  338.77   10.50
   8  -6   0  332.69   10.49
  -8   6   0  334.15   10.58
  -9   6   0    1.63    0.42
   9   6   0    2.15    0.34
   9  -6   0    2.34    0.42
  -9   6   0    2.47    0.39
  -9  -6   0    3.39    0.43
  -9   6   0    2.64    0.57
   9   6   0    3.13    0.68
   9   6   0    1.60    1.20
   9  -6   0    2.74    0.35
  -9  -6   0    2.90    0.38
   9  -6   0    1.73    1.05
  -9  -6   0    2.44    0.34
  -9   6   0    2.61    0.57
   9   6   0    1.91    0.45
   9   6   0    2.13    0.34
  -9  -6   0    2.33    0.58
   9  -6   0    2.98    0.33
  -9   6   0    2.44    0.44
  -9  -6   0    3.36    0.56
   9  -6   0    2.54    0.48
  -9  -6   0    1.59    0.63
 -10   6   0    1.50    1.12
 -10   6   0    1.32    0.57
 -10  -6   0    0.12    1.01
  10  -6   0    1.44    1.57
  10   6   0    0.68    1.97
  10  -6   0    1.04    0.29
  10  -6   0    1.23    0.49
  10   6   0    1.30    0.67
 -10  -6   0    0.89    0.41
 -10  -6   0    0.02    0.88
 -10   6   0    0.72    0.35
  10  -6   0    0.88    0.28
  10   6   0   -0.45    0.46
 -10   6   0    0.83    0.44
 -10  -6   0    0.74    0.56
 -11   6   0    8.48    0.91
 -11  -6   0    8.01    0.82
  11   6   0    8.08    1.17
 -11   6   0    7.85    1.05
 -11  -6   0    8.03    0.77
 -11  -6   0    7.72    1.48
  11  -6   0    9.33    2.14
  11   6   0    7.29    1.70
  11   6   0    7.14    0.81
 -11  -6   0    8.09    1.03
 -12  -6   0   58.28    2.31
 -12  -6   0   56.96    2.06
 -12   6   0   57.00    2.40
 -12   6   0   59.59    2.37
  12  -6   0   53.17    2.13
  12   6   0   57.20    2.11
 -12  -6   0   58.51    2.91
 -12   6   0   55.74    2.11
 -12  -6   0   57.32    2.39
  12  -6   0   58.06    3.64
  12   6   0   56.63    3.69
  12   6   0   53.55    2.41
 -13   6   0   72.89    2.96
  13  -6   0   79.77    4.41
  13   6   0   76.68    2.65
 -13   6   0   71.66    3.01
  13   6   0   72.98    3.04
  13  -6   0   72.40    2.72
 -13   6   0   73.02    2.66
 -13  -6   0   74.15    2.61
 -13  -6   0   74.00    2.90
  13   6   0   78.30    4.48
 -13  -6   0   72.98    2.98
 -13  -6   0   77.30    3.61
 -14   6   0    6.54    1.08
 -14   6   0    5.39    0.75
 -14  -6   0    4.86    1.03
  14   6   0    5.67    1.14
  14  -6   0    5.48    0.74
 -15  -6   0   17.60    2.06
   0  -7   0    0.05    0.22
   0   7   0    0.04    0.24
   0  -7   0    0.02    0.21
   0   7   0    0.16    0.27
   0  -7   0    0.32    0.21
   0  -7   0    0.16    0.21
   0  -7   0    0.03    0.27
   0  -7   0   -0.02    0.22
   0   7   0    0.25    0.23
   0  -7   0    0.10    0.25
   0   7   0   -0.10    0.20
   0   7   0    0.32    0.29
   0   7   0    0.06    0.20
  -1   7   0    7.87    0.95
  -1   7   0    7.30    0.45
  -1  -7   0    7.29    0.52
   1   7   0    6.83    0.42
   1  -7   0    6.79    0.45
   1   7   0    7.77    0.68
  -1   7   0    8.03    0.48
   1  -7   0    6.50    0.45
  -1   7   0    6.64    0.42
  -1  -7   0    7.71    0.44
  -1   7   0    6.25    0.45
  -1  -7   0    6.88    0.47
  -1  -7   0    6.93    0.61
   1   7   0    6.84    0.46
  -1  -7   0    6.89    0.35
   1  -7   0    7.48    0.66
   1   7   0    7.68    0.45
  -1  -7   0    6.78    0.43
  -1   7   0    7.00    0.49
  -1  -7   0    7.43    0.45
   1   7   0    6.70    0.52
   1  -7   0    6.73    0.48
   1  -7   0    7.25    0.48
   2  -7   0  177.55    5.40
   2   7   0  173.57    5.42
   2   7   0  181.81    5.58
  -2  -7   0  176.25    5.42
  -2  -7   0  174.00    5.46
  -2  -7   0  180.79    5.51
  -2   7   0  175.84    5.43
  -2   7   0  176.26    5.45
  -2   7   0  174.90    5.46
  -2   7   0  173.16    5.75
   2   7   0  173.43    5.42
  -2  -7   0  173.17    5.44
   2   7   0  172.50    5.36
   2   7   0  166.08    5.50
  -2   7   0  166.07    5.43
  -2   7   0  166.15    5.41
  -2  -7   0  173.51    5.57
   2   7   0  181.24    5.44
  -2   7   0  165.62    5.38
   2  -7   0  162.74    5.45
   2  -7   0  173.97    5.43
  -2  -7   0  172.49    5.36
   2   7   0  162.17    5.44
  -2  -7   0  163.24    5.42
   2  -7   0  172.34    5.45
   2  -7   0  181.21    5.44
  -3   7   0  401.71   12.71
  -3  -7   0  421.69   12.72
  -3  -7   0  429.00   12.68
  -3   7   0  396.98   12.71
  -3   7   0  405.69   12.62
  -3   7   0  420.33   13.07
  -3  -7   0  394.47   12.86
  -3   7   0  389.68   12.73
  -3  -7   0  421.99   12.80
  -3  -7   0  405.59   12.70
  -3  -7   0  400.94   12.64
  -3  -7   0  405.66   12.72
   3   7   0  415.61   12.68
   3   7   0  413.03   12.87
   3  -7   0  430.00   12.74
   3  -7   0  409.51   12.71
   3   7   0  392.99   12.69
   3   7   0  392.93   12.79
   3  -7   0  396.80   12.71
  -3  -7   0  407.71   12.69
  -3   7   0  420.54   12.74
   3  -7   0  405.32   12.74
  -3   7   0  431.62   12.72
  -3   7   0  398.20   12.62
   3  -7   0  407.70   13.11
   3   7   0  400.58   12.72
   3   7   0  409.15   12.72
   3  -7   0  412.51   12.69
   3   7   0  425.51   12.70
  -4  -7   0  153.13    4.80
   4   7   0  156.17    5.02
  -4  -7   0  156.55    4.81
   4   7   0  152.01    4.82
  -4  -7   0  156.10    4.93
  -4  -7   0  148.37    4.75
  -4  -7   0  150.84    5.01
   4   7   0  154.41    4.79
   4  -7   0  155.04    4.81
  -4   7   0  148.60    4.81
   4  -7   0  145.62    4.83
  -4   7   0  144.46    4.81
  -4   7   0  147.40    4.83
  -4   7   0  157.06    4.77
  -4   7   0  157.67    4.82
   4  -7   0  144.81    5.23
   4   7   0  150.33    4.80
   4  -7   0  153.17    4.81
  -4   7   0  153.24    5.23
   4  -7   0  155.36    4.81
   4   7   0  148.51    4.82
   4   7   0  146.53    4.92
  -4   7   0  147.06    4.83
   4   7   0  151.19    4.79
   4  -7   0  159.62    4.84
  -4   7   0  155.12    4.84
  -5  -7   0   96.77    3.01
   5  -7   0   94.47    3.00
  -5   7   0   96.47    3.01
  -5   7   0   95.95    3.04
   5   7   0   93.76    2.98
  -5  -7   0   92.88    2.96
   5  -7   0   87.34    3.04
   5  -7   0   90.11    3.00
   5   7   0   81.87    3.19
   5  -7   0   92.55    3.02
   5  -7   0   93.50    3.24
  -5   7   0   92.90    3.05
  -5  -7   0   90.05    3.25
   5   7   0   94.80    3.02
   5  -7   0   95.80    3.04
   5   7   0   90.24    3.15
   5   7   0   94.64    2.98
   5  -7   0   86.54    3.50
  -5  -7   0   93.47    3.00
  -5   7   0   88.79    3.01
  -5   7   0   92.94    3.55
   5  -7   0   88.95    3.18
  -5  -7   0   92.97    3.01
   5   7   0   93.62    3.27
  -5   7   0   95.19    2.92
  -5   7   0   92.02    3.03
  -5   7   0   96.17    3.05
  -5  -7   0   92.68    3.15
   5   7   0   97.40    3.03
   6  -7   0    1.04    0.36
  -6   7   0    1.44    0.39
  -6  -7   0    1.22    0.33
  -6   7   0    1.58    0.32
   6  -7   0    0.99    0.30
   6  -7   0    1.04    0.27
  -6  -7   0    0.62    0.31
   6   7   0    1.76    0.39
  -6   7   0    1.28    0.33
   6   7   0    1.27    0.49
   6   7   0    0.48    0.25
  -6  -7   0    1.16    0.28
  -6  -7   0    1.20    0.41
   6  -7   0    1.23    0.36
  -6  -7   0    0.51    0.42
   6   7   0    0.90    0.35
  -6   7   0    0.69    0.39
   6  -7   0    0.18    0.74
  -6   7   0    1.06    0.29
  -7  -7   0   73.20    2.80
  -7   7   0   73.15    2.50
  -7   7   0   72.27    2.43
   7  -7   0   66.75    3.12
  -7   7   0   71.10    2.52
   7   7   0   68.88    2.53
   7   7   0   73.23    2.38
   7  -7   0   76.11    2.47
  -7   7   0   71.25    2.45
  -7   7   0   75.37    2.43
   7   7   0   74.14    2.53
  -7  -7   0   70.96    2.40
   7   7   0   74.56    2.45
  -7  -7   0   72.92    2.53
  -7  -7   0   73.20    2.42
  -7  -7   0   74.93    2.43
   7   7   0   70.58    2.62
   7  -7   0   72.27    2.47
   7  -7   0   71.98    2.40
  -7  -7   0   64.60    2.44
   8  -7   0   35.67    2.36
   8  -7   0   39.49    1.49
   8   7   0   39.43    1.42
   8  -7   0   39.80    1.29
   8   7   0   38.78    1.46
  -8  -7   0   38.98    1.44
  -8   7   0   39.41    1.48
  -8  -7   0   39.67    1.93
  -8   7   0   39.57    1.48
  -8   7   0   39.41    1.58
  -8  -7   0   39.56    1.50
  -8   7   0   40.05    1.48
  -8   7   0   37.68    1.59
  -8  -7   0   38.38    1.45
   8   7   0   38.60    1.49
  -8  -7   0   39.52    1.60
   8   7   0   38.15    1.62
  -8  -7   0   39.67    1.40
   8  -7   0   37.27    1.41
   8   7   0   38.14    1.71
   8  -7   0   38.90    1.52
  -9   7   0   59.30    2.24
   9  -7   0   60.99    2.08
  -9  -7   0   61.09    2.10
   9  -7   0   58.75    2.17
  -9  -7   0   62.24    2.10
   9  -7   0   60.40    3.12
   9   7   0   59.60    2.07
   9  -7   0   62.04    2.15
  -9  -7   0   60.63    2.28
  -9   7   0   63.42    2.21
   9   7   0   61.45    2.14
   9   7   0   59.75    2.05
  -9  -7   0   61.35    2.62
  -9   7   0   60.79    2.15
   9   7   0   59.67    2.39
  -9  -7   0   59.37    2.05
   9  -7   0   57.31    1.95
  -9   7   0   58.69    2.13
  -9  -7   0   59.02    2.23
  -9   7   0   59.67    2.27
 -10  -7   0   52.53    1.82
  10  -7   0   49.93    1.90
 -10  -7   0   47.31    2.34
  10   7   0   51.80    1.86
  10  -7   0   51.29    3.41
 -10   7   0   48.53    1.84
 -10  -7   0   49.91    2.47
  10   7   0   48.95    2.15
  10   7   0   49.33    3.11
 -10   7   0   50.91    2.12
 -10  -7   0   49.82    1.94
 -10   7   0   51.13    2.01
  10  -7   0   46.16    1.75
 -10   7   0   48.96    1.84
  11   7   0   14.75    1.00
 -11  -7   0   14.85    0.94
 -11   7   0   15.72    1.24
 -11  -7   0   16.77    1.21
 -11  -7   0   16.33    1.17
  11   7   0   17.15    2.37
 -11   7   0   14.68    1.21
  11   7   0   13.99    1.84
 -11  -7   0   15.14    1.69
 -11   7   0   15.78    1.00
  11  -7   0   15.14    1.02
  11  -7   0   16.05    2.35
  12   7   0    0.31    0.57
 -12  -7   0    0.16    0.52
 -12  -7   0    0.41    0.82
 -12  -7   0   -0.21    0.71
  12   7   0    1.52    0.84
  12   7   0    0.28    1.64
  12  -7   0    1.47    1.55
  12  -7   0    0.55    0.58
 -12   7   0    0.32    0.77
 -12   7   0   -0.01    0.51
 -12  -7   0   -0.62    0.73
 -12   7   0   -1.69    0.73
  13   7   0    3.13    2.00
  13  -7   0    6.02    1.88
 -13   7   0    2.89    0.67
 -13   7   0    3.64    0.95
 -13   7   0    2.91    0.97
 -13  -7   0    1.99    0.59
 -13  -7   0    2.39    1.01
  13   7   0    2.39    0.64
  13  -7   0    2.17    0.66
 -13  -7   0    4.01    0.95
  13   7   0    2.94    1.01
 -13  -7   0    3.03    0.88
  14  -7   0   20.40    1.32
  14   7   0   23.84    1.84
 -14  -7   0   20.60    1.76
 -14   7   0   22.29    1.35
 -14   7   0   23.41    1.72
   0  -8   0   47.64    1.67
   0   8   0   49.19    1.55
   0   8   0   47.48    1.67
   0  -8   0   49.94    1.68
   0   8   0   50.46    1.65
   0  -8   0   52.28    1.84
   0   8   0   49.44    1.81
   0  -8   0   48.57    1.65
   0   8   0   47.63    1.64
   0  -8   0   48.95    1.65
   0   8   0   48.17    1.68
   0  -8   0   47.85    1.63
   0  -8   0   48.96    1.68
   1   8   0   57.26    1.97
   1  -8   0   63.80    2.22
  -1   8   0   61.11    1.93
  -1   8   0   60.46    1.99
  -1   8   0   59.39    1.98
  -1   8   0   58.51    2.02
  -1  -8   0   61.81    2.01
   1  -8   0   56.68    1.99
   1  -8   0   62.03    1.97
   1   8   0   57.56    2.01
   1   8   0   56.61    2.04
  -1  -8   0   63.58    1.99
   1   8   0   61.37    1.99
  -1   8   0   63.72    2.02
   1  -8   0   59.41    2.02
  -1   8   0   62.68    2.44
  -1  -8   0   57.34    2.25
  -1   8   0   61.11    1.99
   1   8   0   60.83    2.16
  -1  -8   0   56.87    2.01
  -1  -8   0   60.94    2.04
  -1  -8   0   60.77    1.92
   1  -8   0   59.38    1.99
  -2  -8   0  195.22    6.16
  -2  -8   0  202.24    6.31
  -2  -8   0  191.44    6.06
   2   8   0  191.60    6.13
  -2   8   0  199.10    6.15
  -2  -8   0  202.05    6.16
   2   8   0  194.50    6.16
  -2   8   0  189.67    6.15
  -2   8   0  189.14    6.17
  -2   8   0  189.21    6.09
   2  -8   0  204.14    6.15
  -2   8   0  193.95    6.12
  -2  -8   0  195.12    6.14
   2  -8   0  192.52    6.15
  -2  -8   0  209.44    6.14
   2  -8   0  204.69    6.12
   2   8   0  188.29    6.16
   2   8   0  182.15    6.30
  -2  -8   0  199.11    6.22
   2  -8   0  198.06    6.17
  -2   8   0  201.77    6.52
   2   8   0  189.38    6.06
   2   8   0  193.43    6.13
  -3  -8   0  397.88   12.58
  -3  -8   0  422.51   12.69
  -3  -8   0  419.15   12.60
   3  -8   0  414.26   13.05
  -3   8   0  414.95   12.59
  -3   8   0  392.54   12.50
  -3   8   0  427.83   12.63
  -3   8   0  370.62   12.62
   3  -8   0  388.71   12.62
  -3   8   0  412.81   12.98
   3   8   0  414.23   12.60
  -3   8   0  398.29   12.62
  -3  -8   0  397.11   12.76
  -3   8   0  383.56   12.59
   3  -8   0  432.69   12.60
  -3  -8   0  423.51   12.58
   3  -8   0  414.88   12.59
  -3  -8   0  384.66   12.49
   3  -8   0  413.24   12.57
  -3  -8   0  395.68   12.60
   3   8   0  404.96   12.57
   3   8   0  403.39   12.60
   3   8   0  399.55   12.53
   3  -8   0  408.69   12.62
   3   8   0  387.06   12.68
   3   8   0  400.28   12.57
  -4  -8   0   24.88    1.23
   4   8   0   25.17    0.93
  -4  -8   0   24.74    0.87
  -4   8   0   25.50    1.01
   4   8   0   25.08    1.20
  -4   8   0   25.16    1.00
   4   8   0   23.85    0.93
   4  -8   0   24.57    0.96
  -4  -8   0   26.11    1.12
  -4   8   0   25.85    0.99
  -4   8   0   24.98    1.45
  -4  -8   0   23.38    0.96
   4  -8   0   25.94    1.56
  -4  -8   0   25.89    0.95
  -4  -8   0   25.07    0.97
   4   8   0   24.52    1.13
  -4   8   0   23.38    0.98
   4  -8   0   26.33    1.01
   4  -8   0   24.86    0.97
  -4   8   0   24.41    1.00
   4  -8   0   23.22    1.02
   4  -8   0   25.51    0.96
   4   8   0   25.16    0.97
  -4  -8   0   25.26    0.97
   4   8   0   23.89    0.94
   4   8   0   24.56    1.00
  -4   8   0   26.99    0.94
  -5   8   0  155.40    4.81
   5  -8   0  156.82    4.89
   5   8   0  153.76    4.88
   5   8   0  149.81    5.02
  -5   8   0  153.63    4.92
   5  -8   0  145.50    5.39
   5  -8   0  158.92    4.92
  -5   8   0  157.14    4.89
  -5  -8   0  157.95    4.88
  -5   8   0  148.44    4.88
   5   8   0  153.14    4.88
  -5   8   0  156.89    4.92
   5  -8   0  157.53    4.88
   5   8   0  149.85    4.85
  -5  -8   0  152.79    5.13
   5  -8   0  145.58    4.91
   5   8   0  155.89    4.86
  -5  -8   0  155.94    4.89
  -5  -8   0  149.15    4.81
  -5  -8   0  160.36    4.86
  -5   8   0  148.00    4.91
   5   8   0  148.94    4.89
  -5  -8   0  154.85    4.87
   6  -8   0  312.27    9.64
  -6   8   0  298.77    9.65
  -6   8   0  312.38    9.47
  -6  -8   0  304.68    9.58
   6   8   0  314.07    9.60
   6   8   0  310.71    9.57
  -6  -8   0  300.47    9.88
  -6  -8   0  307.83    9.57
   6  -8   0  297.05   10.19
  -6   8   0  302.86    9.63
   6  -8   0  298.67    9.59
   6  -8   0  307.06    9.61
   6  -8   0  292.58    9.63
  -6  -8   0  309.63    9.60
  -6   8   0  308.75    9.62
  -6   8   0  311.21    9.61
  -6   8   0  313.32    9.60
   6   8   0  297.45    9.75
   6   8   0  307.59    9.61
   6   8   0  318.76    9.63
   7   8   0   55.09    1.99
  -7   8   0   56.41    2.07
   7   8   0   56.75    1.92
   7  -8   0   55.51    2.02
  -7  -8   0   56.28    2.35
   7   8   0   57.66    2.05
  -7   8   0   56.42    2.00
  -7  -8   0   56.05    2.07
   7  -8   0   60.06    2.01
  -7  -8   0   56.73    1.96
  -7  -8   0   56.57    1.95
  -7  -8   0   56.19    1.92
  -7   8   0   54.73    1.98
   7   8   0   53.14    2.17
   7   8   0   58.34    1.96
  -7   8   0   58.54    1.98
  -7  -8   0   55.66    1.94
   7  -8   0   56.92    1.94
  -7   8   0   57.08    2.04
   7  -8   0   54.09    2.75
  -8  -8   0  189.05    5.89
  -8   8   0  182.52    5.99
   8  -8   0  189.58    5.94
  -8  -8   0  189.52    5.87
  -8   8   0  192.52    5.91
  -8   8   0  181.57    5.90
   8  -8   0  184.02    5.94
  -8   8   0  187.92    5.94
   8  -8   0  192.25    5.89
  -8  -8   0  184.69    6.29
   8   8   0  180.17    6.09
  -8  -8   0  186.86    6.01
  -8  -8   0  189.62    5.89
   8   8   0  186.36    5.91
  -8  -8   0  172.40    6.06
   8   8   0  170.04    5.98
   8   8   0  184.97    5.85
   8  -8   0  180.27    6.72
  -8   8   0  189.47    5.97
   8   8   0  178.89    5.99
   9   8   0  158.33    4.96
   9   8   0  154.53    5.02
  -9  -8   0  153.94    4.98
  -9   8   0  155.98    5.15
   9  -8   0  152.06    5.01
  -9  -8   0  159.26    5.51
  -9  -8   0  156.42    5.03
  -9   8   0  156.28    5.02
   9  -8   0  159.93    5.11
  -9   8   0  154.01    5.11
  -9   8   0  154.65    5.07
  -9  -8   0  156.03    5.15
   9  -8   0  152.64    5.97
   9  -8   0  149.15    5.06
   9   8   0  149.82    5.25
  -9  -8   0  160.86    5.01
 -10  -8   0    4.22    0.67
 -10   8   0    4.13    0.55
  10   8   0    4.90    1.61
 -10   8   0    4.55    0.77
 -10  -8   0    4.01    0.51
  10   8   0    3.35    0.57
 -10   8   0    3.52    0.54
  10  -8   0    5.22    0.63
 -10  -8   0    2.62    0.74
  10  -8   0    4.45    1.40
  10   8   0    4.79    0.85
  10  -8   0    4.06    0.59
 -10   8   0    4.86    0.72
 -10  -8   0    4.51    0.66
 -11   8   0   55.36    2.22
  11  -8   0   53.26    2.06
 -11  -8   0   52.59    2.12
 -11   8   0   52.93    2.24
  11   8   0   52.32    3.40
 -11   8   0   53.42    2.01
  11   8   0   53.47    2.35
  11   8   0   54.87    2.05
 -11  -8   0   53.69    1.97
  11  -8   0   53.86    3.40
 -11  -8   0   54.95    2.72
 -11  -8   0   54.51    2.23
  12   8   0   -1.12    1.63
  12   8   0    0.30    0.63
 -12  -8   0    0.51    0.53
 -12  -8   0    0.46    0.88
  12  -8   0    1.13    1.52
 -12  -8   0   -0.04    0.67
  12   8   0    0.49    0.85
 -12  -8   0    0.48    0.84
 -12   8   0    0.70    0.56
 -12   8   0    1.78    0.79
 -12   8   0   -0.12    0.79
  12  -8   0   -0.41    0.55
 -13   8   0    5.51    1.05
 -13  -8   0    8.04    1.05
 -13  -8   0    6.30    1.01
  13  -8   0    6.79    0.79
 -13  -8   0    6.40    1.19
 -13   8   0    7.64    1.03
 -13   8   0    7.65    1.10
  13   8   0    7.29    2.23
 -13  -8   0    6.92    0.94
  13   8   0    6.04    0.73
 -14   8   0   12.18    1.17
  14  -8   0    8.37    1.12
 -14   8   0   10.09    1.43
   0   9   0   -0.29    0.22
   0   9   0   -0.27    0.25
   0   9   0   -0.13    0.23
   0  -9   0   -0.10    0.22
   0  -9   0   -0.18    0.24
   0  -9   0    0.43    0.35
   0   9   0    0.23    0.25
   0   9   0    0.33    0.14
   0   9   0   -0.28    0.32
   0  -9   0   -0.36    0.25
   0  -9   0    0.09    0.28
   0   9   0    0.32    0.28
   0  -9   0    0.03    0.26
   0  -9   0   -0.21    0.23
  -1   9   0   10.04    1.19
   1  -9   0    7.76    0.57
   1   9   0    7.84    0.52
   1  -9   0    8.31    0.48
   1   9   0    7.98    0.54
  -1  -9   0    7.37    0.39
   1  -9   0    8.64    0.82
  -1   9   0    6.90    0.51
  -1  -9   0    8.26    0.56
  -1   9   0    7.42    0.48
  -1  -9   0    7.46    0.75
   1   9   0    7.58    0.49
  -1  -9   0    7.38    0.50
  -1   9   0    8.33    0.40
   1   9   0    7.53    0.82
   1  -9   0    6.38    0.85
  -1   9   0    8.23    0.53
  -1   9   0    7.56    0.50
   1   9   0    7.55    0.59
  -1  -9   0    8.05    0.50
   1  -9   0    7.83    0.50
  -1  -9   0    7.92    0.52
  -1  -9   0    7.97    0.53
   1   9   0    7.65    0.47
   1  -9   0    7.63    0.54
   2  -9   0  530.25   16.82
   2  -9   0  494.29   16.70
  -2   9   0  557.87   16.69
  -2  -9   0  528.19   16.66
   2   9   0  534.74   16.64
  -2   9   0  482.18   16.74
  -2  -9   0  557.57   16.67
  -2   9   0  540.00   16.65
   2  -9   0  547.15   16.69
   2   9   0  541.78   16.64
   2   9   0  555.22   16.67
  -2  -9   0  538.79   16.64
  -2   9   0  526.32   16.61
   2   9   0  508.68   16.66
  -2  -9   0  515.75   16.63
   2  -9   0  586.18   16.69
   2  -9   0  547.00   16.65
  -2  -9   0  529.93   16.56
  -2   9   0  524.21   16.60
  -2  -9   0  547.70   16.72
   2   9   0  512.08   16.71
  -2  -9   0  533.49   16.81
  -2   9   0  550.66   17.04
  -2   9   0  559.15   16.65
   2  -9   0  558.73   16.61
  -3  -9   0  182.58    5.79
   3   9   0  182.00    5.71
   3   9   0  174.39    5.81
  -3  -9   0  182.96    6.00
   3  -9   0  169.22    5.81
  -3   9   0  189.81    5.84
   3   9   0  181.38    5.78
  -3   9   0  175.27    5.85
   3   9   0  182.45    5.81
  -3  -9   0  192.43    5.79
   3  -9   0  191.84    5.88
  -3  -9   0  194.57    5.82
   3   9   0  192.62    6.01
  -3  -9   0  187.29    5.82
  -3   9   0  180.48    6.22
  -3   9   0  184.79    5.81
  -3   9   0  167.82    5.84
  -3   9   0  188.09    5.81
   3  -9   0  188.39    5.77
   3  -9   0  184.93    5.85
  -3  -9   0  188.33    5.91
  -3   9   0  178.16    5.71
   3   9   0  176.81    5.90
   3  -9   0  191.89    5.81
   3   9   0  181.66    5.78
   4   9   0  169.10    5.59
   4   9   0  170.70    5.53
   4   9   0  169.02    5.49
  -4   9   0  168.63    5.57
   4  -9   0  176.80    5.55
   4  -9   0  179.91    5.50
  -4  -9   0  182.32    5.50
   4  -9   0  166.61    5.55
   4  -9   0  179.67    5.54
   4   9   0  185.03    5.53
   4   9   0  176.99    5.49
  -4   9   0  174.76    6.03
   4   9   0  172.01    5.74
  -4  -9   0  170.73    5.73
  -4   9   0  176.07    5.52
  -4  -9   0  183.69    5.74
  -4   9   0  172.86    5.52
  -4   9   0  169.00    5.52
  -4  -9   0  177.92    5.53
  -4   9   0  180.04    5.57
  -4  -9   0  169.16    5.50
  -4  -9   0  167.96    5.41
  -4  -9   0  169.74    5.52
   4   9   0  165.50    5.63
  -4   9   0  183.78    5.49
   4  -9   0  161.29    5.52
   4  -9   0  177.29    6.08
  -5  -9   0  375.64   12.42
   5   9   0  405.62   12.16
  -5  -9   0  390.93   12.10
   5  -9   0  378.34   12.74
  -5   9   0  396.35   12.12
   5   9   0  406.14   12.16
   5   9   0  390.13   12.19
   5   9   0  376.47   12.32
  -5   9   0  396.11   12.18
   5  -9   0  398.91   12.18
  -5   9   0  384.53   12.20
   5  -9   0  360.81   12.25
   5  -9   0  383.36   12.22
  -5  -9   0  398.62   12.16
  -5   9   0  393.43   12.19
   5   9   0  416.59   12.20
   5  -9   0  399.55   12.22
  -5   9   0  372.90   12.30
   6   9   0   65.29    2.14
   6  -9   0   60.04    2.86
  -6  -9   0   65.55    2.14
  -6   9   0   60.16    2.23
   6  -9   0   62.74    2.18
  -6   9   0   64.77    2.04
   6   9   0   64.13    2.19
  -6  -9   0   62.89    2.09
   6   9   0   61.21    2.20
   6  -9   0   62.39    2.23
  -6  -9   0   64.10    2.18
   6  -9   0   66.60    2.22
  -6   9   0   66.18    2.22
   6   9   0   66.75    2.17
   6   9   0   60.24    2.36
  -6   9   0   63.43    2.18
  -6  -9   0   62.92    2.16
  -6   9   0   62.54    2.24
  -6  -9   0   65.95    2.53
  -7   9   0  260.49    8.07
  -7  -9   0  262.95    7.99
   7  -9   0  245.55    8.07
   7  -9   0  264.66    8.08
   7   9   0  258.56    7.99
  -7  -9   0  257.78    8.03
  -7  -9   0  254.71    8.11
  -7  -9   0  255.14    7.98
   7  -9   0  239.37    8.72
   7   9   0  258.86    8.02
  -7   9   0  257.32    8.03
   7   9   0  254.02    8.04
  -7  -9   0  250.50    8.37
  -7  -9   0  255.93    8.00
  -7   9   0  252.26    8.09
   7   9   0  257.23    8.07
   7   9   0  244.18    8.20
   7  -9   0  228.08    8.09
  -7   9   0  271.42    8.05
  -8   9   0   22.61    1.14
   8  -9   0   19.68    1.93
   8   9   0   20.88    1.12
   8   9   0   19.53    1.32
  -8   9   0   21.39    1.04
  -8  -9   0   20.90    0.99
   8  -9   0   22.57    1.06
  -8   9   0   21.12    1.16
   8   9   0   22.45    0.92
  -8  -9   0   20.78    1.16
  -8  -9   0   21.36    0.96
  -8  -9   0   21.50    0.93
  -8   9   0   21.30    1.16
   8   9   0   21.60    0.94
  -8   9   0   22.02    1.06
   8  -9   0   21.18    1.09
   8  -9   0   20.76    1.02
  -8  -9   0   19.64    1.49
   8   9   0   21.08    1.07
  -8  -9   0   21.12    1.00
  -9   9   0   20.13    1.14
   9   9   0   17.80    0.83
  -9   9   0   16.88    0.98
   9  -9   0   17.65    1.05
  -9  -9   0   16.58    1.00
  -9  -9   0   18.17    1.15
  -9   9   0   18.62    1.17
   9   9   0   17.17    1.01
  -9  -9   0   17.96    1.53
  -9   9   0   17.66    1.12
   9  -9   0   17.99    2.03
  -9  -9   0   18.26    0.95
   9   9   0   17.42    1.29
   9  -9   0   18.13    0.98
  -9  -9   0   17.42    0.89
  10   9   0    1.24    0.52
  10  -9   0    2.25    1.32
 -10   9   0    2.19    0.68
  10  -9   0    2.42    0.49
 -10  -9   0    0.89    0.66
  10  -9   0    1.35    0.91
 -10  -9   0    1.91    0.67
 -10  -9   0    1.91    0.60
 -10  -9   0    1.44    0.48
 -10   9   0    2.40    0.67
  11   9   0    4.23    1.71
  11   9   0    3.32    0.91
 -11   9   0    2.59    0.58
  11   9   0    2.43    0.71
 -11  -9   0    2.96    0.69
 -11   9   0    2.24    0.75
 -11  -9   0    2.79    0.70
  11  -9   0    3.84    1.58
 -11   9   0    2.90    0.75
  11  -9   0    2.99    0.62
 -11  -9   0    3.27    0.86
  12  -9   0   26.22    1.45
 -12   9   0   27.72    1.73
 -12  -9   0   29.52    1.67
 -12  -9   0   28.56    2.27
 -12   9   0   29.50    1.68
 -12   9   0   28.11    1.41
  12  -9   0   29.46    2.93
 -12  -9   0   29.36    1.36
  12   9   0   30.01    3.07
  12   9   0   26.08    1.38
  12   9   0   29.42    1.83
 -13  -9   0    8.69    1.27
 -13  -9   0   10.29    1.04
 -13  -9   0   11.03    1.37
  13   9   0   12.71    1.68
 -13   9   0   11.16    1.21
  13   9   0    9.04    1.04
 -13   9   0    9.14    1.14
  13   9   0   10.93    2.42
  13  -9   0   13.89    2.73
  13  -9   0    7.68    1.13
 -13   9   0    9.46    1.11
 -13  -9   0   11.01    1.46
  14  -9   0    4.00    0.74
 -14   9   0    2.96    0.99
 -14   9   0    3.38    0.78
   0 -10   0   95.83    3.09
   0  10   0   94.27    3.28
   0 -10   0   97.50    3.11
   0  10   0  101.36    3.13
   0 -10   0   96.00    3.12
   0  10   0   93.98    3.11
   0  10   0   95.84    2.98
   0 -10   0   96.47    3.06
   0  10   0   90.56    3.09
   0  10   0   95.05    3.09
   0 -10   0   93.98    3.09
   0  10   0   90.66    3.12
   1  10   0   71.28    2.47
  -1 -10   0   70.90    2.40
  -1  10   0   71.22    2.39
   1 -10   0   75.93    2.64
   1  10   0   70.99    2.39
  -1  10   0   71.11    2.41
  -1  10   0   71.93    2.43
  -1  10   0   70.88    2.32
   1 -10   0   73.44    2.40
  -1 -10   0   77.95    2.41
   1  10   0   69.90    2.40
   1 -10   0   78.02    2.45
  -1 -10   0   74.12    2.45
  -1 -10   0   75.17    2.61
   1 -10   0   69.50    2.40
  -1  10   0   74.24    2.41
  -1 -10   0   71.64    2.32
  -1  10   0   73.20    2.95
   1  10   0   75.69    2.43
   1 -10   0   67.85    2.44
   1  10   0   70.15    2.43
   1  10   0   73.93    2.62
  -1 -10   0   70.14    2.42
  -1 -10   0   73.13    2.44
   2  10   0    3.61    0.43
   2 -10   0    4.28    0.81
   2  10   0    4.54    0.43
   2 -10   0    3.70    0.35
   2 -10   0    3.79    0.50
  -2  10   0    4.48    0.86
  -2  10   0    4.40    0.37
   2  10   0    4.20    0.62
   2  10   0    4.00    0.51
  -2 -10   0    3.86    0.44
   2 -10   0    4.84    0.53
  -2 -10   0    4.56    0.48
  -2  10   0    3.86    0.48
  -2 -10   0    3.98    0.52
  -2 -10   0    3.75    0.28
   2 -10   0    4.10    0.45
  -2 -10   0    4.32    0.47
   2  10   0    4.06    0.40
   2 -10   0    3.83    0.48
  -2  10   0    3.49    0.49
   2  10   0    2.86    0.50
  -2  10   0    3.51    0.46
  -2  10   0    3.73    0.44
  -2  10   0    3.80    0.38
  -2 -10   0    3.94    0.44
  -3  10   0   76.70    2.58
  -3 -10   0   76.79    2.56
   3  10   0   73.24    2.68
  -3  10   0   77.67    2.55
   3 -10   0   79.15    2.57
   3  10   0   72.99    2.58
   3  10   0   75.58    2.55
   3  10   0   76.11    2.54
  -3 -10   0   78.15    2.79
   3  10   0   77.59    2.44
  -3  10   0   74.80    3.01
   3  10   0   81.87    2.58
   3 -10   0   80.32    2.53
   3 -10   0   77.71    2.58
   3 -10   0   72.97    2.61
  -3 -10   0   78.05    2.59
  -3  10   0   75.83    2.47
   3 -10   0   79.55    2.61
  -3  10   0   80.69    2.60
  -3 -10   0   78.65    2.55
  -3  10   0   81.50    2.58
  -3 -10   0   76.53    2.57
  -3  10   0   79.81    2.62
   3  10   0   78.49    2.80
   4  10   0    3.41    0.34
   4  10   0    3.40    0.45
  -4 -10   0    3.34    0.40
  -4  10   0    3.84    0.52
   4 -10   0    3.82    0.46
  -4  10   0    2.67    0.38
   4 -10   0    3.08    0.43
   4  10   0    3.13    0.42
  -4 -10   0    2.52    0.48
   4 -10   0    2.73    0.38
  -4  10   0    3.29    0.47
  -4  10   0    3.37    0.44
   4 -10   0    3.18    0.93
  -4  10   0    3.32    0.39
   4  10   0    4.38    0.59
   4  10   0    3.62    0.42
   4 -10   0    3.11    0.39
  -4 -10   0    3.29    0.48
  -4 -10   0    3.91    0.46
  -4 -10   0    3.37    0.25
  -5 -10   0  174.57    5.95
   5  10   0  170.55    5.84
   5 -10   0  166.62    5.72
   5 -10   0  188.77    5.74
   5  10   0  177.33    5.66
   5 -10   0  182.57    5.68
  -5  10   0  171.67    5.69
   5 -10   0  183.25    5.69
   5  10   0  168.09    5.69
  -5 -10   0  180.25    5.66
  -5  10   0  174.35    5.70
  -5  10   0  178.52    5.63
  -5  10   0  180.40    5.74
   5  10   0  186.53    5.64
  -5 -10   0  171.42    5.57
   5 -10   0  182.42    6.37
  -5  10   0  191.16    5.70
   5  10   0  186.12    5.70
   6  10   0  290.61    8.67
   6 -10   0  272.29    8.66
  -6  10   0  269.80    8.55
  -6 -10   0  273.47    8.62
  -6  10   0  281.18    8.72
  -6 -10   0  271.99    8.64
  -6  10   0  271.13    8.70
   6  10   0  277.86    8.63
   6  10   0  273.07    8.67
   6 -10   0  271.11    9.36
  -6 -10   0  272.40    8.66
  -6  10   0  279.83    8.67
   6  10   0  266.57    8.83
  -6 -10   0  272.28    8.57
   6  10   0  280.03    8.64
  -6  10   0  280.03    8.67
  -6 -10   0  276.41    8.97
   6 -10   0  276.92    8.70
   6 -10   0  264.95    8.70
   7  10   0  240.47    7.42
   7  10   0  233.05    7.43
   7 -10   0  224.09    8.18
   7 -10   0  238.69    7.42
  -7  10   0  224.90    7.42
  -7  10   0  237.16    7.48
  -7 -10   0  234.53    7.35
  -7 -10   0  230.54    7.49
  -7  10   0  249.89    7.44
  -7 -10   0  233.01    7.38
   7 -10   0  242.94    7.47
   7  10   0  221.44    7.60
   7  10   0  241.51    7.44
  -7 -10   0  232.69    7.78
  -7 -10   0  234.72    7.42
   7  10   0  232.79    7.38
  -7  10   0  231.45    7.48
  -7  10   0  242.06    7.47
   7 -10   0  219.39    7.46
  -7 -10   0  233.51    7.39
   8 -10   0  102.02    3.31
   8  10   0   91.71    3.48
  -8 -10   0   96.78    3.19
  -8  10   0   96.05    3.27
  -8  10   0   98.57    3.32
  -8 -10   0   97.05    3.68
  -8 -10   0   99.04    3.20
   8  10   0   97.15    3.22
  -8  10   0  101.72    3.33
  -8  10   0   96.45    3.35
  -8 -10   0  100.11    3.24
  -8 -10   0   97.29    3.22
   8 -10   0   95.75    4.13
   8  10   0   89.29    3.30
   8 -10   0   90.57    3.29
   8  10   0  101.21    3.19
   8 -10   0   99.10    3.25
  -8  10   0   94.59    3.25
   8  10   0   95.95    3.26
  -8 -10   0   98.09    3.36
  -9 -10   0   80.45    3.53
   9 -10   0   78.30    2.79
  -9  10   0   80.88    2.89
  -9 -10   0   84.35    2.95
  -9  10   0   80.87    2.88
  -9  10   0   81.04    2.81
   9 -10   0   81.45    4.04
   9 -10   0   80.92    2.86
  -9 -10   0   83.09    2.77
   9  10   0   80.47    2.71
  -9  10   0   80.45    2.93
  -9 -10   0   82.35    2.78
  -9 -10   0   81.33    2.79
   9  10   0   80.54    2.82
   9  10   0   81.02    3.08
  10 -10   0    0.99    0.54
 -10  10   0    0.81    0.51
 -10  10   0    0.47    0.66
 -10  10   0    0.96    0.66
 -10 -10   0    0.45    0.48
  10 -10   0    0.72    0.48
  10 -10   0    1.09    1.27
  10  10   0    0.26    0.52
 -10 -10   0    1.39    0.66
 -10 -10   0    1.25    0.71
  10  10   0    0.90    0.81
 -10 -10   0    0.63    0.61
  11 -10   0   27.13    2.66
  11  10   0   27.52    1.31
 -11 -10   0   26.52    1.46
 -11  10   0   24.60    1.55
  11  10   0   27.17    1.73
  11 -10   0   25.59    1.37
  11  10   0   25.66    2.86
 -11 -10   0   26.96    1.56
 -11  10   0   27.00    1.53
 -11 -10   0   27.18    2.03
 -11 -10   0   26.01    1.26
 -11  10   0   26.48    1.34
 -12 -10   0    1.41    0.60
  12 -10   0    2.55    0.69
 -12  10   0    1.11    0.83
  12 -10   0    2.94    1.70
 -12 -10   0    1.91    0.87
 -12 -10   0    1.39    0.93
 -12 -10   0    1.64    0.85
 -12  10   0    2.35    0.64
  12  10   0   -0.17    0.63
  12  10   0    2.10    1.87
 -12  10   0    1.02    0.86
  12  10   0    3.10    1.08
 -13  10   0   39.17    2.07
 -13  10   0   37.67    2.07
 -13  10   0   36.69    1.76
  13 -10   0   41.47    3.38
  13  10   0   38.68    1.70
  13  10   0   38.56    3.68
  13 -10   0   38.07    1.83
 -13 -10   0   39.44    2.65
 -13 -10   0   35.88    2.07
  13  10   0   40.06    2.30
 -13 -10   0   40.47    1.70
 -14  10   0    1.32    0.69
  14 -10   0    0.61    0.65
 -14  10   0   -2.20    1.14
   0  11   0    0.32    0.31
   0  11   0    0.15    0.14
   0  11   0    0.42    0.27
   0 -11   0   -0.31    0.27
   0 -11   0   -0.19    0.28
   0  11   0    0.29    0.27
   0 -11   0    0.17    0.24
   0 -11   0    0.38    0.28
   0 -11   0    0.34    0.31
   0 -11   0    0.16    0.39
   0  11   0    0.42    0.26
   0  11   0   -0.01    0.37
   0 -11   0    0.22    0.33
   1  11   0  212.25    6.56
   1 -11   0  208.73    6.57
  -1 -11   0  205.00    6.45
   1  11   0  212.27    6.53
  -1  11   0  208.22    6.53
  -1 -11   0  209.38    6.55
  -1 -11   0  204.74    6.52
   1 -11   0  208.09    6.56
   1 -11   0  213.60    6.75
   1 -11   0  207.09    6.53
   1  11   0  201.34    6.55
   1  11   0  201.88    6.58
   1  11   0  208.91    6.73
   1 -11   0  213.58    6.53
  -1  11   0  201.54    6.44
  -1  11   0  203.31    6.52
  -1 -11   0  201.54    6.56
  -1  11   0  197.84    6.56
  -1 -11   0  208.92    6.57
  -1 -11   0  195.71    6.52
   1  11   0  212.88    6.52
  -1  11   0  206.92    7.06
  -2  11   0    3.94    0.50
   2 -11   0    3.47    0.45
   2 -11   0    3.00    0.39
   2  11   0    3.78    0.55
  -2 -11   0    4.13    0.75
  -2 -11   0    3.67    0.45
   2  11   0    4.77    0.42
   2 -11   0    4.56    0.45
  -2 -11   0    3.72    0.54
  -2 -11   0    3.85    0.51
  -2  11   0    4.15    0.87
   2  11   0    3.81    0.47
   2  11   0    3.66    0.62
   2 -11   0    3.25    0.40
   2 -11   0    2.53    0.46
  -2 -11   0    3.96    0.27
  -2  11   0    4.15    0.41
  -2 -11   0    3.94    0.39
   2 -11   0    3.51    0.46
  -2  11   0    3.87    0.50
  -2  11   0    3.95    0.46
  -2  11   0    4.11    0.37
   2  11   0    3.65    0.54
  -2  11   0    3.55    0.39
   3  11   0   71.19    2.35
   3  11   0   66.48    2.49
   3 -11   0   65.15    2.41
  -3 -11   0   71.40    2.40
   3  11   0   68.06    2.39
  -3 -11   0   67.08    2.36
   3 -11   0   73.02    2.32
  -3  11   0   70.08    2.38
   3  11   0   69.45    2.38
   3 -11   0   71.81    2.44
  -3  11   0   70.19    2.43
  -3 -11   0   70.30    2.35
   3 -11   0   75.05    2.42
  -3  11   0   75.44    2.39
  -3  11   0   71.16    2.33
  -3 -11   0   71.54    2.62
  -3  11   0   68.91    2.27
   4 -11   0   38.64    1.44
   4 -11   0   38.14    1.36
   4  11   0   37.49    1.39
   4  11   0   39.41    1.26
  -4  11   0   36.96    1.41
   4 -11   0   39.53    1.43
  -4  11   0   34.99    1.40
  -4  11   0   37.88    1.20
  -4  11   0   37.57    1.47
  -4 -11   0   37.32    1.40
   4  11   0   36.80    1.35
   4  11   0   36.72    1.43
  -4  11   0   36.95    1.20
   4  11   0   35.95    1.57
  -4  11   0   37.20    1.39
   4 -11   0   36.47    1.46
  -4 -11   0   36.32    1.68
  -4 -11   0   37.30    1.37
  -4 -11   0   38.28    1.41
   5  11   0  149.06    5.11
   5  11   0  156.19    4.92
  -5 -11   0  149.54    4.80
   5  11   0  148.82    4.96
  -5 -11   0  159.83    4.92
   5  11   0  149.66    4.89
  -5  11   0  156.16    4.90
   5 -11   0  160.78    5.00
   5 -11   0  154.13    5.68
   5 -11   0  157.35    4.93
   5 -11   0  154.97    4.96
  -5 -11   0  159.56    4.97
  -5 -11   0  153.18    5.24
   5 -11   0  153.14    5.07
  -5  11   0  144.05    4.95
  -5  11   0  153.18    5.01
  -5 -11   0  145.41    4.92
  -5  11   0  160.98    4.96
  -5  11   0  152.06    4.96
   5  11   0  160.86    4.96
   6 -11   0   90.15    3.01
   6  11   0   92.16    2.96
   6  11   0   95.60    2.95
   6 -11   0   94.32    3.06
   6  11   0   86.91    3.03
  -6  11   0   88.59    2.89
  -6  11   0   83.40    3.00
   6 -11   0   87.18    3.06
  -6  11   0   86.13    3.11
   6 -11   0   89.66    3.84
  -6 -11   0   88.94    3.36
   6  11   0   94.48    3.01
  -6  11   0   91.96    3.07
   6  11   0   85.58    3.21
  -6 -11   0   90.46    2.97
  -6 -11   0   88.27    3.00
  -6 -11   0   86.83    2.98
  -6 -11   0   87.41    2.86
  -6  11   0   94.47    3.03
   7 -11   0   97.66    3.34
   7  11   0  101.30    3.22
  -7 -11   0  101.04    3.24
  -7  11   0   97.71    3.35
  -7 -11   0   97.03    3.25
  -7 -11   0   99.78    3.27
  -7  11   0   98.85    3.29
  -7 -11   0   97.21    3.18
   7  11   0   96.68    3.30
   7 -11   0   98.62    3.28
   7  11   0   92.83    3.49
   7  11   0  100.77    3.26
   7 -11   0   96.16    3.32
  -7 -11   0   96.85    3.68
  -7  11   0   93.13    3.28
   7  11   0  103.99    3.27
   7 -11   0   95.00    4.14
  -7  11   0   98.38    3.34
  -8  11   0    1.63    0.60
   8 -11   0    0.86    1.13
  -8 -11   0    1.42    0.40
  -8  11   0    2.03    0.59
  -8  11   0    2.04    0.55
  -8  11   0    1.91    0.56
  -8 -11   0    1.38    0.64
   8 -11   0    2.04    0.53
  -8 -11   0    1.81    0.44
   8 -11   0    1.74    0.46
  -8 -11   0    1.89    0.59
   8  11   0    1.59    0.35
   8  11   0    1.68    0.71
  -8 -11   0    2.40    0.49
   8  11   0    2.39    0.53
   8 -11   0    2.13    0.47
   8  11   0    2.34    0.37
  -8  11   0    2.50    0.50
  -9 -11   0   75.58    3.21
   9  11   0   77.30    2.55
   9 -11   0   67.68    2.95
  -9 -11   0   77.33    2.61
  -9 -11   0   78.65    2.63
   9 -11   0   73.72    3.78
  -9  11   0   76.23    2.77
  -9  11   0   77.97    2.76
  -9 -11   0   77.43    2.93
   9  11   0   75.91    2.67
   9 -11   0   76.58    2.66
  -9  11   0   72.85    2.85
 -10 -11   0   -0.11    0.63
 -10 -11   0    1.07    0.87
 -10 -11   0    0.90    0.61
 -10  11   0    1.51    0.53
  10  11   0    2.09    0.88
  10 -11   0    1.08    1.30
 -10  11   0    0.70    0.75
 -10 -11   0    1.39    0.72
  10 -11   0    2.33    0.58
 -10  11   0    1.37    0.72
  10 -11   0    2.05    0.63
 -11 -11   0   24.57    2.01
  11 -11   0   25.86    2.65
  11  11   0   22.44    2.90
  11 -11   0   23.57    1.36
  11  11   0   22.56    1.26
  11  11   0   22.60    1.77
 -11  11   0   23.03    1.31
 -11 -11   0   23.56    1.52
 -11 -11   0   23.74    1.23
 -11  11   0   24.44    1.56
 -11 -11   0   23.48    1.34
 -11  11   0   22.72    1.53
  12  11   0   85.38    3.06
 -12  11   0   88.29    3.33
  12  11   0   86.83    3.54
 -12 -11   0   87.65    3.86
  12 -11   0   85.97    4.56
 -12 -11   0   87.39    3.01
  12  11   0   90.20    4.85
 -12  11   0   84.87    3.07
 -12 -11   0   84.15    3.30
 -12  11   0   87.46    3.34
  12 -11   0   82.69    3.14
  13 -11   0   30.05    1.66
  13  11   0   31.72    2.17
 -13 -11   0   31.05    1.50
  13  11   0   27.98    1.51
 -13  11   0   27.72    1.94
 -13 -11   0   28.99    1.84
  13 -11   0   31.58    3.15
  13  11   0   34.26    3.59
 -13  11   0   32.85    2.06
 -13 -11   0   31.59    2.64
 -13  11   0   29.01    1.60
   0  12   0  103.60    3.53
   0  12   0  114.22    3.54
   0  12   0  109.97    3.91
   0  12   0  104.79    3.50
   0 -12   0  109.31    3.52
   0 -12   0  102.80    3.52
   0 -12   0  109.69    3.74
   0 -12   0  103.59    3.45
   0  12   0  108.08    3.55
   0 -12   0  113.40    3.50
   0  12   0  107.16    3.35
   0  12   0  102.79    3.48
   0 -12   0  103.53    3.54
   0 -12   0  108.30    3.50
  -1  12   0   22.09    0.81
  -1  12   0   22.00    0.97
  -1 -12   0   22.73    0.83
   1  12   0   22.58    0.97
  -1  12   0   22.69    0.94
   1  12   0   21.18    1.05
   1 -12   0   22.88    1.27
  -1  12   0   22.91    0.95
  -1  12   0   21.46    1.03
  -1 -12   0   22.32    0.98
   1  12   0   23.31    0.98
  -1 -12   0   23.95    1.03
  -1 -12   0   22.77    0.95
   1 -12   0   22.30    1.03
   1  12   0   21.05    1.01
   1 -12   0   23.36    0.99
   1 -12   0   21.59    0.97
  -1 -12   0   22.22    1.00
   1 -12   0   22.43    0.95
  -1 -12   0   22.10    1.22
   1 -12   0   22.35    0.95
  -2  12   0   73.83    2.41
   2 -12   0   78.41    2.45
   2  12   0   77.68    2.53
  -2 -12   0   78.22    2.50
  -2  12   0   72.67    2.44
   2  12   0   73.72    2.54
   2  12   0   75.93    2.50
  -2  12   0   73.25    2.55
  -2 -12   0   73.12    2.58
   2 -12   0   70.80    2.50
   2 -12   0   70.21    2.55
   2 -12   0   78.21    2.82
  -2  12   0   76.38    2.51
  -2 -12   0   71.92    2.50
  -2 -12   0   75.35    2.34
   2 -12   0   74.37    2.54
  -2 -12   0   73.72    2.74
   2  12   0   70.36    2.60
  -2 -12   0   74.18    2.55
  -3 -12   0  169.33    5.44
   3 -12   0  177.18    5.40
   3 -12   0  163.80    5.45
  -3 -12   0  173.52    5.71
   3 -12   0  166.24    5.50
   3  12   0  171.87    5.48
  -3 -12   0  164.34    5.50
   3  12   0  165.03    5.57
   3  12   0  172.04    5.44
  -3  12   0  169.45    5.36
   3  12   0  168.84    5.47
   3 -12   0  173.61    5.50
  -3 -12   0  173.23    5.44
  -3  12   0  169.13    5.51
  -3  12   0  171.77    5.46
  -3  12   0  170.89    5.40
  -3  12   0  178.87    5.46
   3 -12   0  170.50    5.72
  -4  12   0   51.70    1.92
   4  12   0   50.63    2.03
  -4  12   0   51.19    1.82
   4 -12   0   50.53    1.91
  -4  12   0   50.70    1.86
  -4 -12   0   50.07    1.97
   4 -12   0   54.68    1.89
  -4 -12   0   52.56    1.98
  -4  12   0   52.87    1.65
  -4  12   0   46.34    1.65
   4 -12   0   53.37    1.86
   4  12   0   51.62    1.84
  -4 -12   0   54.11    1.82
   4 -12   0   52.77    1.79
  -4  12   0   54.92    1.86
  -4 -12   0   50.26    2.16
   4  12   0   48.48    1.87
   5 -12   0   93.96    3.08
   5  12   0   88.70    3.06
   5 -12   0   94.91    3.94
  -5  12   0   88.21    3.04
  -5 -12   0   90.31    3.35
   5 -12   0   91.35    2.99
  -5  12   0   95.07    3.05
   5  12   0   89.53    3.22
  -5 -12   0   89.92    3.04
   5  12   0   81.77    2.92
   5 -12   0   90.76    3.04
   5  12   0   90.86    2.99
  -5  12   0   93.30    2.98
  -5 -12   0   91.78    3.00
  -5 -12   0   89.33    3.01
   5  12   0   91.04    3.03
  -5  12   0   88.81    3.03
  -5  12   0   88.09    3.10
   5 -12   0   91.52    3.10
  -6 -12   0   19.51    0.92
  -6  12   0   18.11    1.02
   6 -12   0   16.79    1.03
   6  12   0   18.09    0.85
   6 -12   0   18.72    0.98
   6  12   0   18.07    0.81
  -6 -12   0   17.52    1.35
  -6  12   0   17.47    1.05
   6 -12   0   18.11    0.98
  -6  12   0   18.72    0.99
  -6  12   0   17.53    0.97
  -6  12   0   17.61    0.79
   6 -12   0   19.43    1.96
   6  12   0   18.62    0.91
   6  12   0   17.92    1.23
   6  12   0   17.71    1.01
  -6 -12   0   17.68    0.70
  -7  12   0   96.55    3.34
   7 -12   0   98.21    4.25
   7  12   0   95.87    3.53
  -7 -12   0   96.91    3.26
  -7  12   0   95.42    3.29
   7  12   0   97.57    3.23
   7  12   0   93.81    3.30
   7  12   0   94.49    3.26
  -7 -12   0   97.03    3.27
  -7 -12   0   98.84    3.70
   7  12   0  103.12    3.23
  -7 -12   0   92.83    3.17
  -7  12   0  102.03    3.31
  -7  12   0   94.47    3.09
   7 -12   0   99.45    3.29
   7 -12   0  101.46    3.34
  -7 -12   0  101.33    3.25
  -7  12   0   98.15    3.38
   7 -12   0   97.29    3.36
  -8  12   0   36.12    1.50
  -8 -12   0   34.88    1.46
  -8  12   0   36.65    1.62
  -8 -12   0   35.72    1.36
   8  12   0   34.40    1.51
  -8  12   0   35.13    1.62
   8  12   0   38.38    1.37
  -8 -12   0   36.80    1.63
   8 -12   0   36.23    1.50
  -8 -12   0   35.32    1.99
   8  12   0   36.10    1.80
   8 -12   0   33.89    2.54
   8 -12   0   34.45    1.56
  -8 -12   0   36.60    1.44
   9 -12   0   97.94    4.44
  -9  12   0   97.22    3.45
   9  12   0   96.48    3.34
   9 -12   0   97.48    3.34
  -9  12   0   96.99    3.34
  -9 -12   0   95.02    3.23
  -9 -12   0   98.92    3.54
   9  12   0   96.69    3.64
   9 -12   0   97.41    3.40
  -9 -12   0   99.95    3.29
  -9  12   0   99.19    3.60
  -9 -12   0   95.37    3.83
 -10 -12   0   17.75    1.45
  10 -12   0   15.54    2.31
  10  12   0   14.69    1.09
 -10 -12   0   15.95    1.08
  10  12   0   14.36    1.55
 -10  12   0   16.33    1.27
 -10 -12   0   17.75    1.73
 -10 -12   0   17.98    1.31
 -10  12   0   15.74    1.11
  10 -12   0   15.20    1.15
 -11  12   0  109.28    3.78
  11  12   0  107.20    3.75
 -11 -12   0  110.70    4.45
  11  12   0  108.98    4.18
 -11 -12   0  113.57    3.71
 -11  12   0  107.99    3.94
  11 -12   0  107.00    5.11
  11 -12   0  108.68    3.83
 -11 -12   0  113.74    3.97
 -12  12   0    7.49    0.86
  12  12   0    8.31    2.31
 -12 -12   0    7.94    1.24
 -12 -12   0    7.91    1.04
  12 -12   0    6.78    0.88
 -12 -12   0    7.60    0.99
  12  12   0    9.59    1.36
 -12  12   0    7.00    1.06
  12 -12   0    7.29    2.04
  12  12   0    7.56    0.85
 -13  12   0   42.46    1.99
  13  12   0   44.49    1.91
  13 -12   0   42.65    2.04
  13  12   0   48.27    2.52
 -13 -12   0   48.22    1.91
   0  13   0    0.36    0.15
   0  13   0    0.02    0.40
   0 -13   0    0.19    0.34
   0  13   0    0.01    0.37
   0  13   0    0.05    0.33
   0 -13   0   -0.09    0.39
   0  13   0    0.42    0.32
   0 -13   0    0.35    0.42
   0 -13   0    0.32    0.35
   0 -13   0    0.27    0.31
   0 -13   0    0.42    0.28
  -1 -13   0  140.39    4.50
  -1  13   0  138.91    4.51
   1  13   0  135.79    4.56
   1 -13   0  132.20    4.55
  -1  13   0  136.62    4.59
   1 -13   0  148.22    4.80
   1  13   0  142.07    4.51
  -1  13   0  139.82    4.38
  -1 -13   0  134.16    4.50
   1  13   0  151.35    4.55
  -1 -13   0  139.22    4.40
   1  13   0  140.39    4.55
  -1  13   0  140.10    4.56
   1 -13   0  139.35    4.50
  -1 -13   0  138.58    4.55
  -1 -13   0  138.95    4.55
   1 -13   0  134.63    4.50
  -2  13   0   41.75    1.67
  -2  13   0   44.62    1.49
   2  13   0   43.10    1.60
   2 -13   0   45.61    1.54
  -2 -13   0   41.35    1.87
   2 -13   0   44.25    1.62
  -2 -13   0   42.74    1.66
  -2  13   0   40.65    1.60
  -2 -13   0   44.15    1.59
   2  13   0   43.97    1.61
   2 -13   0   44.10    1.67
   2 -13   0   44.70    1.96
   2  13   0   42.88    1.72
   2  13   0   43.68    1.65
  -2 -13   0   43.50    1.60
  -2  13   0   42.18    1.52
  -3 -13   0  147.23    4.68
   3  13   0  153.01    4.69
  -3  13   0  140.50    4.75
  -3  13   0  141.91    4.70
  -3 -13   0  145.41    4.73
  -3 -13   0  142.73    5.17
  -3  13   0  145.91    4.59
   3  13   0  138.12    4.81
   3 -13   0  148.07    4.63
  -3 -13   0  139.16    4.68
   3 -13   0  144.06    4.76
  -3  13   0  159.40    4.86
   3  13   0  146.81    4.72
   3 -13   0  141.17    4.70
   3  13   0  142.86    4.73
  -3  13   0  146.28    4.63
   3 -13   0  145.28    4.99
  -4  13   0    5.55    0.36
  -4 -13   0    6.64    0.64
  -4  13   0    5.96    0.70
   4 -13   0    5.93    0.59
   4  13   0    6.35    0.89
  -4 -13   0    5.91    0.73
   4  13   0    6.57    0.62
   4 -13   0    5.68    0.70
   4 -13   0    6.67    0.96
   4 -13   0    5.09    0.58
  -4  13   0    4.73    0.54
  -4 -13   0    4.80    0.53
  -4  13   0    5.25    0.40
   4  13   0    6.36    0.66
  -4  13   0    5.17    0.62
  -4 -13   0    5.60    0.97
  -4  13   0    5.99    0.78
   4  13   0    5.24    0.71
  -5  13   0   26.90    1.43
  -5  13   0   23.91    1.13
   5  13   0   24.09    1.10
   5 -13   0   26.45    1.16
  -5  13   0   24.09    1.24
   5  13   0   22.62    1.37
  -5 -13   0   23.77    1.49
   5 -13   0   24.86    1.07
  -5 -13   0   23.90    1.19
  -5 -13   0   26.96    1.10
   5  13   0   23.61    1.17
   5 -13   0   24.03    1.20
  -5  13   0   22.18    1.18
  -5  13   0   23.65    1.13
   5  13   0   24.63    1.11
  -5 -13   0   24.35    1.12
   6  13   0   78.82    2.63
  -6  13   0   73.85    2.52
  -6 -13   0   74.34    3.02
   6  13   0   72.23    2.66
  -6 -13   0   74.10    2.59
  -6  13   0   74.80    2.65
   6 -13   0   78.56    2.65
   6 -13   0   77.92    3.65
  -6  13   0   72.48    2.63
   6  13   0   72.49    2.85
  -6  13   0   75.76    2.72
   6 -13   0   72.14    2.69
   6  13   0   87.51    2.67
   7  13   0   26.38    1.58
   7  13   0   29.19    1.22
   7 -13   0   28.98    1.37
   7  13   0   30.05    1.34
  -7  13   0   28.25    1.38
  -7 -13   0   28.14    1.02
  -7  13   0   27.61    1.04
   7  13   0   29.20    1.12
  -7 -13   0   29.08    1.28
  -7 -13   0   29.71    1.76
  -7 -13   0   27.64    1.27
   7 -13   0   28.10    2.37
  -7  13   0   27.91    1.31
  -7  13   0   28.09    1.43
   7  13   0   29.66    1.23
   7 -13   0   27.91    1.31
   8 -13   0    2.31    0.56
  -8  13   0    2.18    0.66
  -8  13   0    1.39    0.60
   8 -13   0    2.50    0.77
  -8 -13   0    2.25    0.53
   8  13   0    2.76    0.58
  -8 -13   0    2.45    0.66
  -8 -13   0    2.32    0.47
  -8 -13   0    2.19    0.41
   8  13   0    2.50    0.38
  -8  13   0    1.86    0.60
   9 -13   0   -0.26    0.56
   9 -13   0    1.06    0.58
  -9 -13   0    1.35    0.48
  -9 -13   0    0.38    0.68
  -9  13   0   -0.26    0.51
   9  13   0    1.12    0.83
  -9  13   0    0.43    0.68
  -9  13   0    1.13    0.65
   9 -13   0   -0.28    1.37
  -9 -13   0   -0.03    0.66
 -10  13   0   47.44    2.10
  10 -13   0   45.37    3.28
 -10 -13   0   48.02    2.57
  10  13   0   46.62    1.93
 -10  13   0   48.67    1.96
 -10 -13   0   49.29    2.13
 -10 -13   0   49.13    1.89
  10  13   0   47.42    2.39
  10 -13   0   46.87    2.01
 -11  13   0    5.08    0.77
 -11 -13   0    5.46    0.71
  11  13   0    8.05    1.29
  11 -13   0    5.06    1.85
 -11 -13   0    4.74    1.06
 -11  13   0    6.44    0.96
 -11 -13   0    7.26    1.04
  11  13   0    5.25    0.78
  11 -13   0    6.00    0.85
 -12 -13   0    5.99    0.99
  12 -13   0    6.12    0.89
 -12 -13   0    5.61    0.76
  12  13   0    9.70    1.40
  12  13   0    6.43    0.85
 -12  13   0    6.22    0.85
  12 -13   0    5.48    2.10
 -12  13   0    5.43    1.03
  12  13   0    6.13    2.33
 -12 -13   0    6.13    1.14
 -13  13   0   43.28    1.97
 -13 -13   0   47.29    2.10
  13 -13   0   42.77    2.29
  13  13   0   45.64    1.92
   0 -14   0   22.28    0.91
   0 -14   0   22.91    1.35
   0 -14   0   22.12    1.04
   0  14   0   22.00    1.09
   0 -14   0   22.30    1.02
   0  14   0   22.15    1.04
   0  14   0   22.24    0.76
   0 -14   0   20.15    1.09
   0  14   0   22.47    1.08
   1  14   0   76.88    2.58
   1  14   0   75.95    2.82
   1  14   0   75.61    2.59
  -1  14   0   75.74    2.41
   1 -14   0   74.40    2.64
  -1 -14   0   73.79    2.44
  -1  14   0   73.53    2.63
   1 -14   0   77.05    2.88
  -1 -14   0   73.34    2.58
   1 -14   0   76.34    2.58
  -1  14   0   74.31    2.58
   1  14   0   75.68    2.66
   1 -14   0   75.79    2.57
  -1 -14   0   80.34    2.64
  -1 -14   0   67.72    2.68
  -1  14   0   75.62    2.57
  -1 -14   0   76.64    2.86
   2 -14   0   67.71    2.22
   2  14   0   68.23    2.31
  -2  14   0   65.74    2.30
   2 -14   0   66.92    2.65
  -2  14   0   65.70    2.37
   2  14   0   67.75    2.29
   2  14   0   63.32    2.40
  -2 -14   0   62.34    2.28
   2 -14   0   62.65    2.30
   2  14   0   61.42    2.32
  -2 -14   0   67.33    2.28
   2 -14   0   60.52    2.34
  -2 -14   0   67.87    2.36
  -2  14   0   64.68    2.23
  -2 -14   0   71.24    2.71
   3 -14   0    7.37    0.76
  -3  14   0    7.40    0.61
   3 -14   0    7.37    1.18
  -3  14   0    7.56    0.89
   3  14   0    5.93    0.65
  -3 -14   0    7.97    0.71
  -3 -14   0    6.75    1.01
  -3 -14   0    7.32    0.80
  -3  14   0    7.31    0.73
   3 -14   0    7.28    0.61
   3  14   0    8.69    0.73
   3  14   0    7.23    0.91
  -3 -14   0    7.47    0.72
  -3  14   0    7.07    0.51
   3  14   0    6.12    0.76
   4  14   0  252.78    7.94
   4  14   0  242.82    8.06
  -4 -14   0  264.55    7.91
  -4 -14   0  246.50    8.22
   4 -14   0  247.36    7.92
  -4  14   0  250.58    7.93
  -4  14   0  247.50    7.87
   4 -14   0  247.97    8.25
  -4  14   0  247.93    7.75
   4  14   0  249.98    7.90
  -4 -14   0  257.31    7.96
   4 -14   0  251.04    7.85
   4  14   0  243.06    7.94
   4 -14   0  233.54    7.96
  -4  14   0  255.82    8.00
  -4 -14   0  248.37    7.90
   5 -14   0   32.75    1.53
  -5 -14   0   37.09    1.87
  -5  14   0   36.30    1.60
  -5 -14   0   36.53    1.47
   5  14   0   35.33    1.72
  -5 -14   0   36.11    1.53
   5  14   0   36.31    1.46
   5  14   0   34.48    1.45
  -5  14   0   37.20    1.49
  -5 -14   0   37.78    1.46
  -5  14   0   36.76    1.46
   5  14   0   34.93    1.52
   5 -14   0   36.11    1.51
   5 -14   0   38.03    1.43
  -5  14   0   34.98    1.49
  -6  14   0   61.55    2.22
   6  14   0   62.67    2.21
  -6  14   0   61.26    2.11
  -6  14   0   59.39    2.21
   6 -14   0   61.33    2.23
  -6 -14   0   63.20    2.64
   6  14   0   61.93    2.19
   6  14   0   58.89    2.47
  -6 -14   0   60.10    2.17
   6 -14   0   58.06    2.28
   6  14   0   56.81    2.23
  -6  14   0   64.52    2.35
   7  14   0   62.91    2.39
   7 -14   0   68.93    3.57
  -7  14   0   66.32    2.51
   7 -14   0   65.93    2.39
  -7 -14   0   67.10    2.43
  -7 -14   0   65.90    2.84
  -7  14   0   67.05    2.42
  -7  14   0   65.74    2.40
   7 -14   0   63.11    2.44
  -7 -14   0   66.29    2.36
   7  14   0   68.38    2.35
   7  14   0   64.40    2.67
  -7  14   0   61.87    2.17
   8  14   0    3.11    0.87
   8 -14   0    3.40    0.63
  -8 -14   0    4.85    0.75
   8  14   0    3.79    0.91
  -8  14   0    3.47    0.72
  -8 -14   0    3.68    0.58
  -8  14   0    4.65    0.78
   8  14   0    2.63    0.63
  -8  14   0    3.84    0.61
   8 -14   0    2.60    0.65
   8 -14   0    2.87    1.52
  -8 -14   0    2.38    0.74
  -9 -14   0  206.95    6.51
  -9  14   0  204.58    6.63
  -9 -14   0  205.64    7.07
   9  14   0  194.53    6.84
   9  14   0  191.89    6.54
   9 -14   0  205.34    6.56
  -9  14   0  205.14    6.67
   9 -14   0  206.86    7.83
   9 -14   0  193.82    6.61
  -9  14   0  201.11    6.56
  -9 -14   0  203.89    6.66
  10  14   0   14.54    1.16
 -10  14   0   15.01    1.35
  10  14   0   16.70    1.69
  10 -14   0   11.04    2.58
 -10  14   0   15.44    1.19
  10 -14   0   13.92    1.22
 -10 -14   0   15.24    1.12
 -10 -14   0   12.50    1.84
 -10 -14   0   16.65    1.39
  11 -14   0  136.65    4.77
 -11 -14   0  140.55    4.88
 -11  14   0  143.03    4.88
 -11 -14   0  139.03    5.36
  11  14   0  137.62    5.14
  11 -14   0  135.91    6.24
 -11 -14   0  142.11    4.63
  11  14   0  134.37    4.67
 -11  14   0  140.24    4.71
 -12 -14   0    0.66    0.68
 -12  14   0   -0.29    0.73
  12 -14   0    1.48    0.79
 -12 -14   0    0.58    0.91
 -12  14   0   -0.12    0.88
  12  14   0   -0.01    0.74
  12 -14   0   -0.90    1.89
 -12 -14   0    0.89    0.92
  12  14   0    1.60    1.22
  12  14   0    2.01    2.09
  13  14   0   31.82    1.64
   0 -15   0    0.33    0.43
   0 -15   0    0.00    0.48
   0  15   0    0.29    0.43
   0  15   0    0.36    0.49
   0  15   0    0.07    0.15
   0 -15   0    0.29    0.47
   0  15   0    0.01    0.42
   0 -15   0    0.18    0.30
  -1 -15   0  138.90    4.61
  -1  15   0  142.04    4.55
   1  15   0  137.03    4.54
  -1 -15   0  142.85    4.85
  -1 -15   0  140.74    4.55
   1 -15   0  136.97    4.55
   1  15   0  140.94    4.60
  -1  15   0  135.44    4.60
   1  15   0  140.41    4.63
  -1  15   0  140.34    4.38
  -1 -15   0  136.01    4.41
   1 -15   0  139.63    4.61
  -1  15   0  135.17    4.54
   1 -15   0  143.95    4.88
  -2  15   0   97.47    3.41
  -2 -15   0  106.25    3.54
  -2  15   0  103.07    3.54
  -2 -15   0  105.89    3.79
  -2  15   0  105.03    3.45
   2 -15   0  100.90    3.53
   2  15   0  104.09    3.82
  -2 -15   0   96.74    3.46
   2  15   0  101.32    3.58
   2 -15   0  104.93    3.53
   2  15   0  104.20    3.52
   2 -15   0  109.21    3.86
   2 -15   0  107.43    3.39
   2 -15   0  103.35    3.48
   2  15   0  109.35    3.48
  -2 -15   0  109.75    3.62
  -2  15   0   97.68    3.47
  -3 -15   0  112.78    3.60
   3  15   0  103.50    3.75
   3 -15   0  110.92    4.00
   3  15   0  108.12    3.63
   3 -15   0  105.33    3.63
   3  15   0  109.10    3.66
  -3  15   0  104.69    3.49
  -3  15   0  107.83    3.62
  -3  15   0  110.28    3.52
  -3 -15   0  101.88    3.60
  -3 -15   0  108.37    3.67
  -3  15   0  107.82    3.69
   3 -15   0  106.81    3.68
   3 -15   0  112.16    3.53
   3  15   0  112.97    3.61
  -3 -15   0  108.69    3.93
  -4 -15   0    9.95    0.84
  -4 -15   0   10.34    1.20
  -4  15   0   10.28    0.53
   4  15   0    9.83    0.84
  -4  15   0    8.46    0.96
   4 -15   0   10.08    0.94
   4 -15   0   11.02    0.73
   4  15   0    9.12    1.13
   4  15   0    9.66    0.78
  -4  15   0    8.79    0.84
   4 -15   0    9.37    0.89
   4  15   0    9.43    0.89
  -4  15   0    9.78    0.78
  -4 -15   0   10.94    0.94
  -4 -15   0    9.59    0.82
   4 -15   0   10.18    1.34
  -5  15   0   24.64    1.24
  -5  15   0   24.90    1.22
   5  15   0   24.66    1.27
   5 -15   0   25.66    1.26
  -5 -15   0   25.68    1.29
   5 -15   0   22.41    1.30
   5  15   0   25.46    1.19
  -5 -15   0   27.98    1.21
  -5  15   0   25.25    1.19
   5  15   0   24.18    1.18
  -5 -15   0   24.33    1.21
  -5 -15   0   24.78    1.62
   5 -15   0   26.59    1.77
   5  15   0   24.41    1.48
  -5  15   0   26.97    1.38
   6 -15   0   11.97    1.01
  -6  15   0   12.13    0.94
  -6  15   0   12.38    0.94
   6  15   0   11.12    1.27
  -6  15   0   10.73    0.95
   6  15   0   10.24    0.79
   6  15   0   12.03    0.98
  -6 -15   0   11.84    1.36
   6  15   0   11.93    0.91
  -6  15   0   12.23    1.12
   6 -15   0   11.69    0.98
  -7  15   0    2.62    0.72
  -7  15   0    3.07    0.64
  -7 -15   0    3.81    0.60
  -7  15   0    2.65    0.36
   7 -15   0    2.70    0.63
   7 -15   0    1.74    1.02
  -7 -15   0    2.36    0.64
   7  15   0    3.01    0.57
   7  15   0    2.63    0.59
  -8 -15   0   19.14    1.71
   8 -15   0   18.72    1.24
   8 -15   0   17.93    2.59
   8  15   0   18.99    1.56
   8  15   0   17.41    1.18
   8 -15   0   18.76    1.24
  -8  15   0   20.07    1.46
  -8  15   0   19.65    1.19
   8  15   0   18.81    1.08
  -8 -15   0   19.31    1.14
  -9  15   0   19.48    1.26
   9  15   0   19.39    1.71
   9 -15   0   19.82    1.31
   9  15   0   18.00    1.23
  -9 -15   0   18.21    1.84
   9 -15   0   16.57    2.69
  -9 -15   0   18.22    1.19
  -9  15   0   19.80    1.52
  -9  15   0   19.74    1.35
  -9 -15   0   19.62    1.39
   9 -15   0   19.83    1.31
  10 -15   0    0.40    0.69
 -10 -15   0    1.68    0.79
 -10 -15   0    0.95    0.60
 -10  15   0    0.04    0.75
  10  15   0    1.06    1.09
  10  15   0    0.00    0.67
  10 -15   0   -0.65    1.80
 -10 -15   0    0.95    0.88
 -10  15   0    0.64    0.68
  11  15   0   11.23    1.83
  11 -15   0    9.36    1.27
 -11 -15   0    8.38    1.12
 -11 -15   0    7.76    1.23
 -11  15   0    9.38    1.24
  11 -15   0    8.67    2.43
 -11  15   0    8.18    1.08
 -11 -15   0    9.46    1.14
  11  15   0    9.16    1.16
 -12  15   0   50.16    2.31
 -12 -15   0   47.05    2.32
 -12 -15   0   50.39    2.09
  12  15   0   55.25    2.92
  12 -15   0   48.21    2.21
 -12  15   0   46.49    2.14
  12  15   0   46.48    2.09
  13  15   0   18.01    1.75
   0 -16   0   34.45    1.56
   0  16   0   33.83    1.52
   0 -16   0   36.01    1.84
   0 -16   0   34.61    1.48
   0  16   0   35.07    1.49
   0 -16   0   35.96    1.33
   0  16   0   36.35    1.15
   0  16   0   35.61    1.54
  -1 -16   0   38.05    1.67
   1 -16   0   38.40    1.65
   1  16   0   39.36    1.64
  -1  16   0   37.46    1.56
  -1 -16   0   36.97    1.56
  -1 -16   0   38.48    1.33
  -1  16   0   37.91    1.65
   1 -16   0   37.00    1.58
  -1 -16   0   38.53    1.90
  -1  16   0   38.54    1.56
   1  16   0   37.88    1.68
   1  16   0   38.24    1.56
   1 -16   0   39.55    1.56
   1 -16   0   38.75    1.96
  -1  16   0   38.63    1.30
   2 -16   0   39.82    1.68
  -2  16   0   35.61    1.48
  -2  16   0   32.98    1.56
   2  16   0   32.54    1.51
  -2 -16   0   34.56    1.46
   2  16   0   34.32    1.62
  -2  16   0   34.43    1.40
   2  16   0   33.77    1.45
   2 -16   0   35.62    1.54
   2 -16   0   34.65    1.56
   2 -16   0   35.14    1.92
  -2  16   0   34.39    1.27
   2 -16   0   32.70    1.48
  -2 -16   0   34.34    1.81
  -2 -16   0   34.88    1.56
   2 -16   0   33.69    1.35
  -3  16   0    0.00    0.46
   3 -16   0    0.10    0.63
   3 -16   0    0.66    0.40
   3  16   0    0.52    0.50
  -3 -16   0    0.58    0.56
  -3  16   0    0.14    0.36
   3 -16   0    0.48    0.51
  -3 -16   0    0.44    0.48
  -3  16   0    0.48    0.55
  -3  16   0    0.43    0.34
   3 -16   0   -0.28    0.52
   3  16   0    0.53    0.48
   3  16   0    0.04    0.64
  -3 -16   0    0.03    0.55
  -4 -16   0  267.89    8.61
   4 -16   0  272.40    8.96
   4 -16   0  259.92    8.46
   4  16   0  275.33    8.55
  -4  16   0  268.17    8.49
   4  16   0  268.09    8.60
  -4 -16   0  287.02    8.66
   4 -16   0  256.97    8.62
  -4  16   0  278.51    8.66
   4  16   0  262.39    8.72
   4 -16   0  278.07    8.58
  -4  16   0  269.41    8.39
  -4  16   0  260.52    8.56
   4  16   0  270.80    8.74
  -4 -16   0  259.84    8.54
  -4 -16   0  267.99    8.90
  -5 -16   0    1.28    0.52
  -5  16   0    0.83    0.57
  -5  16   0    1.87    0.51
  -5  16   0    0.54    0.49
  -5 -16   0    0.75    0.61
  -5  16   0    1.08    0.62
   5  16   0    1.51    0.78
  -5 -16   0    1.85    0.47
   5 -16   0    1.85    0.59
   5 -16   0    1.25    0.59
   5  16   0    0.81    0.44
   5  16   0    0.54    0.50
   5 -16   0    0.40    0.72
  -5 -16   0    1.06    0.59
   5  16   0    0.97    0.54
  -6  16   0   25.96    1.30
   6 -16   0   28.84    1.41
  -6  16   0   28.00    1.38
  -6  16   0   28.66    1.35
   6 -16   0   28.45    1.49
   6  16   0   27.46    1.71
  -6  16   0   26.54    1.55
   6  16   0   30.98    1.36
   6  16   0   28.41    1.40
  -6 -16   0   27.28    1.83
  -7  16   0   83.72    2.91
  -7  16   0   82.29    3.07
   7 -16   0   82.47    2.93
   7  16   0   74.65    3.12
   7 -16   0   78.53    2.97
   7  16   0   81.78    2.88
   7  16   0   80.03    3.19
  -7 -16   0   84.93    3.41
  -7 -16   0   83.40    2.98
  -7  16   0   83.35    2.92
  -7 -16   0   77.25    2.90
   8 -16   0   38.27    1.79
  -8  16   0   38.25    1.73
   8  16   0   37.10    2.09
  -8  16   0   38.31    1.99
  -8 -16   0   37.95    1.66
  -8  16   0   38.62    1.77
  -8 -16   0   39.54    1.87
   8  16   0   34.02    1.70
   8 -16   0   42.51    1.80
  -8 -16   0   40.29    2.29
  -9  16   0  125.23    4.34
  -9 -16   0  127.72    4.87
   9  16   0  128.31    4.69
  -9  16   0  125.78    4.80
   9 -16   0  125.13    4.37
  -9 -16   0  128.43    4.40
  -9  16   0  124.57    4.29
  -9 -16   0  127.21    4.23
   9  16   0  117.04    4.26
   9 -16   0  125.33    4.30
 -10  16   0   49.80    2.16
 -10 -16   0   44.72    2.69
  10  16   0   45.75    1.99
 -10 -16   0   48.27    1.94
 -10 -16   0   47.05    2.18
 -10  16   0   43.30    2.02
  10 -16   0   38.71    3.75
  10 -16   0   44.93    2.09
  10  16   0   41.96    2.53
  11 -16   0   85.48    3.31
 -11  16   0   88.24    3.26
  11 -16   0   78.24    4.99
 -11 -16   0   89.22    3.15
  11  16   0   83.24    3.21
  11  16   0   92.49    3.78
 -11  16   0   89.16    3.39
 -11 -16   0   87.18    3.93
 -11 -16   0   92.13    3.44
 -12 -16   0    1.01    0.75
  12  16   0    0.77    0.80
   0 -17   0   -0.20    0.59
   0  17   0    0.42    0.60
   0 -17   0    0.45    0.56
   0  17   0    0.25    0.53
   0 -17   0    0.80    0.52
   0  17   0    0.17    0.15
   0  17   0   -0.02    0.48
   0 -17   0    0.40    0.59
   0 -17   0    0.31    0.31
   1  17   0  183.07    5.80
  -1  17   0  182.59    5.81
  -1 -17   0  168.99    5.79
  -1 -17   0  184.03    5.89
  -1  17   0  179.43    5.60
   1 -17   0  176.86    5.88
  -1 -17   0  174.88    5.62
  -1 -17   0  181.77    6.14
   1 -17   0  171.17    5.80
   1 -17   0  190.74    5.83
   1 -17   0  187.07    6.19
  -1  17   0  175.57    5.86
   1  17   0  171.58    5.85
  -1  17   0  179.12    5.80
   1 -17   0  174.07    5.77
   1  17   0  179.65    5.89
  -2 -17   0   12.24    0.97
   2 -17   0   13.76    1.07
   2 -17   0   10.83    0.82
   2 -17   0   12.99    1.00
  -2  17   0   13.66    0.93
  -2  17   0   13.52    0.71
   2 -17   0   10.97    1.08
   2  17   0   14.15    1.17
  -2  17   0   13.55    0.97
  -2  17   0   14.41    1.11
   2 -17   0   13.92    1.49
  -2 -17   0   12.07    1.12
   2  17   0   14.65    0.99
  -2 -17   0   13.17    1.33
   2  17   0   11.51    1.03
  -3  17   0   45.18    1.79
   3  17   0   42.82    1.97
  -3  17   0   43.75    1.62
   3 -17   0   42.65    1.80
   3 -17   0   43.63    1.94
  -3  17   0   43.90    1.91
   3 -17   0   44.94    1.89
   3  17   0   42.24    1.78
  -3 -17   0   46.39    1.92
  -3 -17   0   43.52    2.14
  -3 -17   0   45.23    1.78
   3 -17   0   46.53    1.65
   3  17   0   44.43    1.83
   3 -17   0   47.09    2.29
  -4  17   0    6.17    0.78
   4  17   0    7.41    0.95
   4 -17   0    7.57    0.94
  -4 -17   0    8.33    0.89
   4  17   0    8.92    1.22
   4  17   0    6.69    0.69
  -4 -17   0    6.55    1.25
   4 -17   0    7.67    1.02
  -4  17   0    5.80    0.69
  -4 -17   0    6.43    0.79
  -4  17   0    7.00    0.75
  -4  17   0    8.20    0.52
   5 -17   0   27.99    1.49
   5  17   0   26.01    1.40
   5 -17   0   27.23    1.91
   5  17   0   25.57    1.34
   5 -17   0   29.19    1.43
   5  17   0   27.48    1.69
  -5  17   0   27.14    1.27
  -5  17   0   28.99    1.55
  -5 -17   0   27.47    1.79
  -5 -17   0   27.57    1.36
  -5  17   0   24.17    1.40
  -5 -17   0   26.87    1.49
  -5  17   0   26.53    1.37
  -6  17   0   55.69    2.15
  -6  17   0   57.99    2.20
   6  17   0   58.91    2.18
  -6  17   0   57.86    2.15
   6  17   0   51.32    2.23
  -6 -17   0   55.85    2.68
   6  17   0   56.23    2.52
   6 -17   0   57.92    2.23
   6 -17   0   54.46    2.28
   6 -17   0   56.62    2.80
  -6  17   0   57.53    2.35
  -7 -17   0   12.40    1.06
   7  17   0   11.48    1.08
  -7  17   0   13.08    1.08
  -7  17   0   14.32    1.12
   7 -17   0   14.16    1.22
  -7  17   0   12.59    1.41
   7  17   0   13.40    1.10
   7 -17   0   11.98    1.18
  -7 -17   0   12.24    1.58
  -7 -17   0   10.56    1.25
   7  17   0   14.78    1.50
  -8  17   0    0.84    0.87
  -8 -17   0    0.17    0.74
  -8 -17   0    0.44    0.77
   8  17   0    0.17    0.92
  -8 -17   0   -0.60    0.60
   8  17   0   -0.02    0.62
   8 -17   0    1.00    0.70
  -8  17   0    0.64    0.64
   8 -17   0   -0.45    0.72
  -8  17   0   -0.43    0.65
   9 -17   0    0.37    0.76
  -9 -17   0    1.32    0.85
   9  17   0    1.78    1.09
  -9  17   0    1.53    0.78
  -9 -17   0   -0.95    0.80
   9 -17   0   -0.11    0.77
  -9  17   0    0.38    0.69
  -9 -17   0    0.82    0.67
   9  17   0    1.08    0.72
 -10 -17   0   15.43    2.05
 -10  17   0   15.48    1.38
 -10 -17   0   17.30    1.33
  10  17   0   19.20    2.06
 -10 -17   0   18.68    1.59
 -10  17   0   18.89    1.52
  10  17   0   14.84    1.32
  10 -17   0   16.51    1.47
  11  17   0   20.53    1.95
  11  17   0   15.70    1.42
 -11 -17   0   15.60    1.37
  11 -17   0   16.66    1.48
 -11 -17   0   18.38    2.10
 -11  17   0   17.27    1.45
 -11 -17   0   17.32    1.65
 -11  17   0   18.59    1.67
 -12 -17   0   49.08    2.07
  12  17   0   45.47    2.04
   0  18   0    0.95    0.60
   0  18   0    1.35    0.54
   0 -18   0    1.54    0.36
   0  18   0    2.05    0.70
   0 -18   0    0.73    0.63
   0 -18   0    1.43    0.58
   0 -18   0    1.52    0.66
   1  18   0    1.04    0.71
  -1 -18   0    1.25    0.67
   1 -18   0    1.19    0.53
  -1  18   0    0.42    0.64
   1 -18   0    1.03    0.65
  -1  18   0    0.99    0.51
  -1 -18   0    1.15    0.55
  -1 -18   0    0.73    0.56
   1 -18   0    1.29    0.54
   1 -18   0    0.49    0.67
   1  18   0    0.75    0.52
   1  18   0    0.26    0.56
  -1  18   0    1.27    0.61
  -1 -18   0    0.64    0.58
   1 -18   0    1.03    0.77
   2 -18   0  111.48    3.92
  -2  18   0  109.53    3.76
   2  18   0  113.00    3.95
  -2 -18   0  115.52    3.93
   2 -18   0  115.69    3.87
   2  18   0  107.31    3.87
  -2  18   0  115.52    3.63
  -2  18   0  116.06    3.94
   2 -18   0  116.83    4.26
  -2  18   0  107.12    3.82
   2 -18   0  112.02    3.84
   2 -18   0  111.76    3.68
   2  18   0  110.97    3.82
  -2 -18   0  111.89    3.82
  -2 -18   0  114.03    4.20
   3 -18   0    0.35    0.55
  -3  18   0    0.28    0.40
   3 -18   0    0.27    0.63
   3 -18   0    0.93    0.39
  -3  18   0    0.44    0.64
  -3  18   0    1.38    0.55
  -3 -18   0    0.75    0.70
   3 -18   0   -0.04    0.69
  -3 -18   0   -0.05    0.61
   3  18   0   -0.01    0.57
  -3  18   0    0.15    0.53
   3  18   0    0.91    0.77
   3  18   0    0.58    0.55
  -3 -18   0   -0.41    0.53
   3 -18   0   -0.17    0.71
   4  18   0   19.57    1.27
  -4 -18   0   20.72    1.22
  -4 -18   0   19.06    1.63
  -4  18   0   18.24    1.20
   4 -18   0   20.41    1.33
   4  18   0   18.46    1.21
  -4  18   0   22.62    1.40
  -4  18   0   21.44    0.85
  -4 -18   0   20.78    1.38
   4 -18   0   21.85    1.27
  -4  18   0   21.59    1.04
   4 -18   0   20.18    1.51
   4  18   0   18.83    1.50
   4 -18   0   20.93    1.82
   5 -18   0    0.08    0.68
  -5  18   0   -0.88    0.68
   5 -18   0    1.26    0.65
   5  18   0   -0.53    0.58
  -5 -18   0    1.11    0.74
   5  18   0    0.10    0.61
  -5  18   0    0.00    0.60
   5 -18   0    0.76    1.14
  -5 -18   0   -0.21    0.58
  -5  18   0   -0.26    0.67
  -5  18   0    0.63    0.52
  -5 -18   0    0.36    0.68
   6  18   0   30.18    1.57
   6 -18   0   35.57    1.71
   6  18   0   34.24    1.60
   6  18   0   33.75    1.91
  -6  18   0   34.45    1.58
   6 -18   0   30.23    1.62
  -6  18   0   30.79    1.58
  -6 -18   0   33.47    1.56
  -6 -18   0   32.36    2.05
  -6  18   0   32.21    1.50
   6 -18   0   31.01    2.17
  -6  18   0   30.87    1.77
   7 -18   0    0.66    0.69
  -7  18   0    0.90    0.85
   7 -18   0    0.43    0.89
   7  18   0    1.38    0.96
   7 -18   0    0.03    0.73
   7  18   0    0.89    0.65
  -7 -18   0    0.91    0.64
   7  18   0    0.63    0.64
  -7  18   0    0.58    0.63
  -7 -18   0    0.06    0.74
  -7  18   0    1.40    0.65
  -8 -18   0   10.30    1.15
  -8  18   0    9.24    1.18
   8 -18   0    9.50    1.01
  -8 -18   0    9.43    1.77
  -8  18   0    9.61    1.17
   8  18   0    8.37    1.16
  -8  18   0   10.39    1.18
   8  18   0   12.06    1.68
  -8 -18   0   11.86    1.33
   8 -18   0    9.83    1.29
  -9  18   0   22.20    1.51
  -9 -18   0   22.05    1.44
  -9  18   0   22.61    1.54
   9  18   0   19.81    1.46
   9  18   0   23.81    2.03
   9 -18   0   21.58    1.61
  -9 -18   0   23.39    1.63
  -9 -18   0   23.74    2.18
  10  18   0   36.55    1.90
 -10  18   0   38.90    2.28
 -10 -18   0   40.15    1.88
  10 -18   0   36.51    2.03
 -10 -18   0   37.13    2.62
  10  18   0   41.50    2.52
 -10 -18   0   41.08    2.14
 -10  18   0   40.47    1.98
  11  18   0   19.90    1.51
 -11 -18   0   22.88    1.52
 -11  18   0   21.58    1.71
 -11 -18   0   24.32    1.80
   0 -19   0   -0.19    0.33
   0 -19   0   -0.01    0.66
   0  19   0   -0.53    0.53
   0  19   0   -0.65    0.78
   0 -19   0   -0.53    0.55
   0  19   0    0.00    0.58
   0 -19   0   -1.12    0.66
   1  19   0  129.38    4.52
   1 -19   0  133.98    4.88
   1 -19   0  131.18    4.40
  -1 -19   0  133.94    4.85
  -1  19   0  131.13    4.46
   1 -19   0  132.62    4.56
   1  19   0  129.53    4.55
  -1  19   0  131.26    4.45
  -1  19   0  132.15    4.53
   1 -19   0  132.93    4.46
  -1 -19   0  135.47    4.20
  -1  19   0  132.72    4.17
  -1 -19   0  136.94    4.57
  -1 -19   0  135.37    4.46
   1  19   0  131.39    4.46
  -2  19   0   10.13    0.68
  -2 -19   0    9.79    1.42
   2  19   0    8.50    1.01
   2  19   0   10.49    1.12
  -2 -19   0   12.42    1.27
  -2  19   0    9.60    1.03
   2 -19   0    9.77    1.52
  -2  19   0   11.34    1.18
  -2 -19   0    9.77    1.03
   2  19   0    9.09    1.29
  -2  19   0   10.66    1.03
   2 -19   0   10.44    1.05
   2 -19   0   11.05    1.15
   2 -19   0   12.23    1.22
   3  19   0   40.19    1.79
   3 -19   0   41.14    1.80
  -3 -19   0   43.91    2.22
  -3 -19   0   41.39    1.95
  -3  19   0   42.75    1.93
   3 -19   0   43.03    2.36
  -3  19   0   42.23    1.56
   3  19   0   34.22    2.19
   3 -19   0   41.14    1.92
  -3  19   0   41.08    1.77
  -3  19   0   41.88    1.66
   3  19   0   40.88    2.04
   3 -19   0   42.14    1.97
   4 -19   0   30.83    1.84
   4 -19   0   28.76    1.53
   4  19   0   26.74    1.55
  -4  19   0   28.67    1.68
  -4 -19   0   30.88    1.70
  -4 -19   0   33.04    1.52
  -4 -19   0   31.24    1.99
   4  19   0   30.19    1.52
  -4  19   0   32.49    1.59
  -4  19   0   29.89    1.33
   4  19   0   32.13    1.86
   4 -19   0   30.81    2.28
   4 -19   0   30.50    1.87
  -5 -19   0   28.70    1.93
  -5  19   0   27.77    1.32
  -5  19   0   25.11    1.56
   5 -19   0   27.53    1.86
   5 -19   0   25.33    2.06
   5  19   0   27.68    1.79
  -5 -19   0   25.98    1.44
   5 -19   0   30.11    1.53
  -5  19   0   25.41    1.44
  -5  19   0   27.92    1.67
   5  19   0   27.34    1.48
   5  19   0   26.64    1.49
  -5 -19   0   29.07    1.70
   5 -19   0   26.60    1.57
  -6  19   0   76.27    3.10
   6 -19   0   88.78    3.08
  -6  19   0   85.73    3.24
   6 -19   0   85.87    3.68
  -6  19   0   85.66    3.00
  -6 -19   0   82.67    3.02
  -6 -19   0   82.74    3.54
  -6  19   0   81.05    3.03
   6  19   0   85.43    3.06
   6 -19   0   82.56    3.15
   6  19   0   84.51    3.35
   6  19   0   77.65    3.05
  -6 -19   0   84.08    3.19
  -7  19   0   -0.82    0.90
  -7 -19   0   -0.05    0.79
   7 -19   0   -1.17    0.93
   7 -19   0    0.53    0.77
   7  19   0    0.39    1.04
  -7  19   0   -0.31    0.64
   7  19   0    0.32    0.68
   7 -19   0   -0.52    0.76
  -8  19   0   10.81    1.28
  -8  19   0   11.50    1.28
   8 -19   0   11.23    1.39
  -8  19   0   12.14    1.25
   8 -19   0   11.87    2.10
  -8 -19   0   12.17    1.88
  -8 -19   0   13.03    1.27
   8  19   0   12.86    1.30
   8 -19   0   13.27    1.40
   8  19   0   16.39    1.86
  -8 -19   0   13.01    1.46
   9 -19   0   -0.68    1.12
  -9  19   0    0.82    0.85
  -9  19   0   -0.26    0.79
  -9 -19   0    0.53    0.94
   9  19   0   -0.11    1.23
   9 -19   0    0.03    0.85
  -9 -19   0    2.13    0.94
  -9 -19   0   -0.03    0.74
   9  19   0   -0.60    0.75
  10  19   0   51.47    2.36
  10 -19   0   53.41    2.43
 -10  19   0   56.42    2.38
  10  19   0   56.95    2.86
 -10  19   0   55.57    2.50
 -10 -19   0   52.45    2.28
 -10 -19   0   52.50    2.99
 -10 -19   0   57.10    2.58
 -11 -19   0    5.84    0.87
 -11 -19   0    3.36    1.18
  11  19   0    4.55    1.13
   0 -20   0    0.98    0.66
   0 -20   0    0.23    0.73
   0 -20   0    0.63    0.87
   0 -20   0    1.38    0.37
   0  20   0    0.51    0.79
   0  20   0    0.52    0.60
   0  20   0    0.35    0.70
   1 -20   0    7.76    0.82
  -1  20   0    7.27    0.80
   1 -20   0    7.75    0.96
  -1  20   0    7.46    0.87
  -1 -20   0    7.06    0.93
   1  20   0    7.90    1.04
  -1  20   0    7.33    0.40
   1  20   0    8.04    1.25
  -1  20   0    8.85    1.15
   1 -20   0    7.88    0.95
  -1 -20   0    9.06    1.31
   1 -20   0    6.37    1.15
   2 -20   0    8.13    1.17
  -2 -20   0    9.34    1.07
  -2  20   0    8.19    0.92
   2 -20   0    9.75    1.28
   2  20   0    7.74    1.13
   2 -20   0    7.17    1.46
  -2 -20   0    7.60    1.41
   2  20   0    9.53    1.35
  -2  20   0    9.52    1.10
  -2  20   0    8.61    1.08
   2 -20   0    8.14    0.83
  -2 -20   0   10.43    1.32
  -2  20   0    8.92    0.65
   2  20   0    7.38    0.81
  -3 -20   0    1.28    0.83
   3 -20   0    1.56    0.88
  -3 -20   0    1.50    0.76
  -3  20   0    1.31    0.48
   3  20   0    1.68    0.67
   3 -20   0    1.77    0.87
   3 -20   0    2.05    0.90
  -3  20   0    2.01    0.68
   3 -20   0    0.94    0.69
  -3  20   0    1.54    0.76
  -3  20   0    0.51    0.66
   3  20   0    1.77    0.67
   3  20   0    1.10    0.93
  -3 -20   0    0.99    0.64
  -4 -20   0  105.12    4.19
  -4 -20   0  106.25    3.73
  -4  20   0  107.12    3.58
  -4 -20   0  109.47    3.88
   4  20   0  107.24    3.74
   4 -20   0  101.62    3.85
  -4  20   0  113.51    3.90
   4  20   0   99.85    3.77
   4  20   0  108.26    4.01
   4 -20   0  111.20    3.97
   4 -20   0  109.97    3.77
  -4  20   0  103.68    3.72
   4 -20   0  110.01    4.33
  -5 -20   0   -0.15    0.85
  -5  20   0   -0.64    0.65
   5 -20   0   -0.44    0.85
   5 -20   0   -0.20    0.77
  -5 -20   0    0.53    0.77
   5 -20   0   -0.53    1.00
  -5  20   0    0.26    0.83
   5  20   0   -0.51    0.67
   5 -20   0    0.01    0.73
   5  20   0    1.02    0.96
  -5  20   0   -0.26    0.81
  -5 -20   0    0.19    0.67
   5  20   0    0.09    0.71
  -5  20   0   -0.67    0.55
   6 -20   0    0.21    0.77
   6 -20   0    0.26    0.76
  -6 -20   0   -0.41    0.89
  -6 -20   0   -0.68    0.68
   6  20   0    0.44    0.73
   6  20   0    1.09    1.04
  -6  20   0    0.59    0.87
  -6 -20   0    0.66    0.79
  -6  20   0    0.24    0.67
   6 -20   0   -0.55    1.01
  -6  20   0    0.01    0.63
   6  20   0    0.06    0.69
  -7  20   0    4.40    1.12
   7 -20   0    2.27    1.17
   7 -20   0    3.13    0.89
  -7  20   0    4.56    0.80
   7  20   0    3.75    0.83
  -7  20   0    4.21    0.80
   7 -20   0    4.07    1.05
  -7 -20   0    4.20    1.03
   7  20   0    3.28    1.21
   8  20   0    5.17    1.36
  -8 -20   0    2.87    0.85
   8  20   0    1.63    0.82
   8 -20   0    0.62    1.13
  -8  20   0    0.73    1.79
  -8  20   0    1.26    0.81
   8 -20   0    1.05    1.10
  -8 -20   0    2.76    1.03
   8 -20   0    2.26    0.93
  -8 -20   0    0.41    0.93
  -8  20   0    2.16    0.78
   9  20   0    2.98    0.90
  -9 -20   0    5.61    1.10
  -9  20   0    6.79    1.03
   9 -20   0    5.58    1.01
   9 -20   0    4.24    1.33
  -9 -20   0    3.93    1.09
  -9  20   0    4.27    0.92
  -9 -20   0    5.15    0.90
   9  20   0    6.80    1.46
 -10 -20   0    1.58    1.06
  10  20   0   -0.30    0.82
 -10  20   0    1.57    0.91
 -10 -20   0    2.86    0.81
   0 -21   0   -0.53    0.77
   0 -21   0   -0.69    0.69
   0  21   0    0.61    0.72
   0  21   0    1.16    0.90
   0 -21   0    0.45    0.67
   0  21   0    0.09    0.62
  -1 -21   0   19.65    1.56
  -1  21   0   20.04    1.50
   1 -21   0   19.41    1.38
  -1 -21   0   21.87    1.83
   1 -21   0   21.61    1.22
   1  21   0   19.82    1.41
   1  21   0   20.10    1.33
   1  21   0   21.29    1.58
  -1  21   0   23.37    1.48
  -1  21   0   20.69    1.38
   1 -21   0   20.63    1.56
  -1 -21   0   21.47    1.35
   1 -21   0   18.75    1.83
   2  21   0    0.72    0.92
  -2 -21   0    0.77    0.86
  -2  21   0    0.15    0.79
   2 -21   0   -0.03    0.85
   2 -21   0   -0.37    0.78
   2 -21   0    1.08    0.78
   2  21   0   -0.35    0.65
  -2  21   0    0.67    0.68
  -2  21   0   -0.05    0.79
   2 -21   0   -0.13    0.78
   2  21   0    0.45    0.66
  -2 -21   0    0.11    0.66
  -2 -21   0   -0.36    0.74
   3  21   0    6.64    0.84
  -3  21   0    7.65    0.76
  -3 -21   0    8.35    1.12
  -3 -21   0    7.28    1.04
   3 -21   0    5.87    0.96
   3  21   0    6.50    0.87
  -3 -21   0    5.03    0.95
   3 -21   0    5.44    0.93
  -3  21   0    8.64    1.65
   3 -21   0    8.85    1.43
   3 -21   0    4.39    1.06
  -3  21   0    5.76    0.79
   4  21   0   35.13    1.79
   4 -21   0   35.63    2.43
  -4 -21   0   34.24    2.00
   4  21   0   36.57    2.09
  -4  21   0   35.01    1.73
  -4  21   0   33.82    1.54
   4  21   0   36.20    1.76
  -4  21   0   33.78    2.53
   4 -21   0   34.59    2.12
  -4 -21   0   35.97    2.24
   4 -21   0   36.64    1.93
   4 -21   0   31.14    1.94
  -4 -21   0   36.19    1.73
   5 -21   0   -0.08    1.03
  -5  21   0    2.34    0.65
   5 -21   0    2.17    0.88
  -5  21   0    2.33    0.72
  -5  21   0    3.62    1.11
  -5 -21   0    1.78    0.77
  -5 -21   0    3.80    0.99
   5 -21   0    3.27    1.15
  -5 -21   0    1.90    0.88
  -5  21   0    0.23    0.90
   5  21   0    1.52    0.76
   5  21   0    0.47    0.75
   5  21   0    3.14    1.14
   5 -21   0    3.03    0.84
   6  21   0   51.46    2.32
  -6  21   0   54.93    2.15
  -6  21   0   54.10    2.30
  -6 -21   0   51.99    2.28
   6  21   0   55.18    2.71
   6 -21   0   54.74    2.35
  -6 -21   0   51.93    2.85
   6 -21   0   55.04    2.83
   6 -21   0   48.60    3.04
  -6  21   0   58.31    2.61
   6 -21   0   53.96    2.46
   6  21   0   53.55    2.90
   7 -21   0    1.90    0.91
   7 -21   0    1.45    1.31
  -7  21   0    1.30    1.09
   7  21   0    1.24    0.83
   7 -21   0   -1.16    1.14
  -7  21   0    1.95    0.79
   7 -21   0    0.95    0.93
   7  21   0    1.67    1.30
  -7  21   0    2.06    0.75
  -7 -21   0    0.41    0.93
  -8 -21   0   67.16    2.74
  -8  21   0   60.95    2.61
  -8 -21   0   62.01    2.58
   8 -21   0   59.29    2.73
   8 -21   0   69.83    2.64
   8  21   0   62.86    3.17
  -8  21   0   65.03    2.56
   8 -21   0   57.63    3.48
   8 -21   0   64.08    3.30
  -8 -21   0   62.07    3.28
   8  21   0   55.13    2.60
   9 -21   0   -0.01    1.09
  -9 -21   0   -0.16    0.95
  -9  21   0    0.77    1.11
  -9 -21   0   -1.12    0.98
   9  21   0    1.80    1.77
  -9 -21   0    1.38    0.82
   9 -21   0   -0.53    1.14
  -9  21   0    1.71    0.91
   9  21   0    0.49    0.85
   9 -21   0    0.40    1.46
 -10  21   0   22.61    1.72
 -10 -21   0   24.80    1.89
   0  22   0    7.50    0.98
   0 -22   0    4.92    0.98
   0 -22   0    8.02    0.90
   0  22   0    7.62    1.11
   1 -22   0    3.61    0.92
  -1  22   0    3.20    0.99
   1  22   0    1.25    0.77
  -1 -22   0    1.82    0.86
  -1 -22   0    4.28    0.94
  -1 -22   0    3.24    0.78
  -1  22   0    3.09    0.88
   1  22   0    4.78    1.06
  -1  22   0    3.01    0.75
   1  22   0    4.50    0.80
   1 -22   0    3.15    0.77
   1 -22   0    1.15    0.90
  -2  22   0   38.17    1.98
   2  22   0   36.23    1.89
   2 -22   0   36.47    1.84
   2 -22   0   35.02    2.37
   2  22   0   35.16    1.78
  -2 -22   0   35.23    2.29
  -2 -22   0   34.68    2.04
  -2 -22   0   36.18    1.80
   2  22   0   37.48    2.32
   2 -22   0   38.09    2.00
  -2  22   0   35.06    1.77
  -2  22   0   37.03    1.80
   3  22   0    6.11    1.20
  -3 -22   0    5.83    1.08
   3 -22   0    4.04    0.99
   3 -22   0    3.36    0.81
   3  22   0    4.39    0.87
  -3 -22   0    2.97    0.90
   3  22   0    6.06    0.85
  -3 -22   0    5.11    0.81
  -3  22   0    4.42    0.91
   3 -22   0    5.49    1.02
  -3  22   0    4.50    0.81
   4 -22   0   88.99    3.29
  -4  22   0   91.17    3.44
  -4  22   0   91.24    3.27
   4 -22   0   92.64    3.57
   4  22   0   81.61    3.31
  -4  22   0   78.66    3.41
   4  22   0   93.15    3.57
   4  22   0   83.41    3.26
  -4 -22   0   93.07    3.49
  -4 -22   0   89.37    3.26
   4 -22   0   90.72    3.43
   4 -22   0   84.97    3.90
  -4 -22   0   89.06    3.80
   5 -22   0    6.26    1.33
  -5  22   0    4.32    1.27
  -5  22   0    4.70    0.87
   5  22   0    8.41    1.37
   5 -22   0    3.14    1.24
   5  22   0    5.30    0.95
   5  22   0    4.90    0.91
  -5 -22   0    4.73    1.03
  -5  22   0    3.93    1.11
  -5 -22   0    5.56    1.06
   5 -22   0    4.34    1.05
  -5  22   0    6.22    0.74
   5 -22   0    6.07    0.98
  -5 -22   0    5.41    0.90
   6 -22   0   20.07    2.18
   6 -22   0   18.78    1.69
   6  22   0   16.41    1.50
   6  22   0   17.97    2.08
  -6 -22   0   14.67    2.04
  -6 -22   0   16.07    1.50
   6 -22   0   17.62    1.56
  -6  22   0   18.41    1.93
  -6  22   0   18.04    1.28
  -6  22   0   17.20    1.46
  -7  22   0    5.98    0.95
  -7  22   0    7.21    0.90
   7  22   0   10.87    1.61
  -7 -22   0    4.27    1.13
  -7  22   0    9.13    1.32
   7 -22   0    7.74    1.18
   7 -22   0    6.34    1.07
   7  22   0    8.24    1.08
   7 -22   0   10.92    1.66
  -8 -22   0   15.62    1.70
   8 -22   0   13.46    2.43
   8 -22   0   13.15    1.55
   8  22   0   12.59    2.15
  -8 -22   0   13.18    1.49
   8  22   0    9.58    1.42
  -8 -22   0   12.37    2.13
  -8  22   0   12.06    1.38
  -8  22   0   13.06    1.40
   9 -22   0    0.25    1.54
  -9  22   0    0.91    0.90
  -9 -22   0   -0.62    1.08
   0 -23   0   -0.06    0.89
   0  23   0    1.83    1.09
   0 -23   0   -0.20    0.86
   0  23   0    1.13    0.83
   0 -23   0   -0.24    0.78
   0  23   0    1.00    0.73
   1  23   0   72.75    2.94
   1 -23   0   69.87    3.40
  -1 -23   0   72.64    3.03
   1  23   0   74.52    3.06
  -1 -23   0   69.68    2.82
   1 -23   0   72.63    2.84
  -1  23   0   72.60    2.81
   1 -23   0   74.40    3.05
   1  23   0   74.91    2.83
  -1  23   0   72.77    2.89
  -1 -23   0   68.42    3.33
  -1  23   0   73.40    2.98
   2  23   0    3.75    1.49
   2  23   0    4.11    0.92
  -2  23   0    4.13    0.81
   2 -23   0    2.82    0.81
   2  23   0    5.02    1.20
   2 -23   0    1.20    1.02
  -2 -23   0    2.78    0.82
  -2 -23   0    2.22    0.98
   2 -23   0    3.82    1.02
  -2  23   0    4.40    0.97
  -3 -23   0    1.52    0.93
   3  23   0    3.38    1.18
   3 -23   0    0.45    0.81
  -3  23   0    1.80    0.81
   3  23   0    1.85    0.89
  -3 -23   0    2.11    0.81
  -3  23   0    1.42    0.94
   3 -23   0    2.16    1.01
  -3 -23   0    1.02    1.09
   3  23   0    2.83    0.92
   3 -23   0    0.35    1.06
  -4 -23   0   50.93    2.88
   4 -23   0   48.48    3.04
  -4 -23   0   54.56    2.61
  -4  23   0   56.92    2.56
   4  23   0   51.68    2.32
   4 -23   0   57.41    2.38
   4  23   0   49.80    2.37
  -4  23   0   47.41    2.55
  -4 -23   0   55.34    2.33
   4 -23   0   53.49    2.56
  -4  23   0   51.08    2.31
   4  23   0   55.19    2.73
  -5  23   0    1.80    1.06
   5  23   0    3.07    0.91
   5 -23   0    3.68    1.08
   5  23   0    5.61    1.37
   5 -23   0    3.32    2.14
   5 -23   0    1.61    0.92
  -5  23   0    3.64    0.90
   5 -23   0    0.71    1.23
  -5 -23   0    1.56    1.00
   5  23   0    2.17    0.87
  -5 -23   0    2.97    0.89
  -6 -23   0   56.69    2.48
   6 -23   0   48.31    3.33
  -6 -23   0   52.90    3.10
  -6  23   0   57.35    2.50
   6 -23   0   59.55    3.08
   6 -23   0   62.01    2.60
   6  23   0   54.51    2.51
   6 -23   0   55.41    2.69
  -6  23   0   60.31    2.88
   6  23   0   61.02    3.02
   7 -23   0    8.88    1.23
   7  23   0   10.15    1.64
  -7  23   0    6.92    1.43
   7 -23   0    8.19    1.72
  -7 -23   0    5.99    1.24
   7 -23   0   10.25    1.19
  -7  23   0    8.88    1.05
   7  23   0    5.85    1.03
  -7 -23   0    6.29    1.15
  -8 -23   0    4.13    1.16
   8 -23   0    5.59    1.72
   9 -23   0    3.09    1.53
  -9 -23   0    0.30    1.02
   0  24   0   49.73    2.25
   0  24   0   53.39    2.45
   0 -24   0   51.15    2.55
   0 -24   0   49.43    2.92
   0  24   0   52.06    2.52
   0 -24   0   48.53    2.51
   1 -24   0    3.20    1.11
  -1 -24   0    2.94    1.00
   1  24   0    3.59    0.89
   1  24   0    5.33    1.00
  -1  24   0    4.00    1.04
  -1 -24   0    3.15    0.92
  -1  24   0    5.36    0.93
   1  24   0    6.26    1.36
   1 -24   0    3.49    1.11
  -1 -24   0    6.02    1.18
   1 -24   0    3.05    0.93
  -1  24   0    3.72    1.64
   2  24   0  137.43    4.79
   2  24   0  121.56    4.60
   2 -24   0  136.34    4.75
  -2  24   0  130.25    4.54
  -2  24   0  132.12    4.72
   2  24   0  126.93    4.52
   2 -24   0  123.86    5.12
  -2 -24   0  134.58    4.77
  -2 -24   0  124.03    4.51
  -2 -24   0  124.39    5.06
   2 -24   0  126.25    4.56
  -3  24   0    2.50    0.85
   3  24   0    3.34    0.91
  -3 -24   0    1.47    1.15
   3  24   0    2.63    0.96
   3 -24   0    1.95    1.12
  -3  24   0    2.73    1.05
   3 -24   0   -0.31    1.06
  -3 -24   0    1.99    1.01
   3 -24   0    1.41    0.89
  -3 -24   0    1.44    0.88
   3  24   0    4.79    1.37
  -4  24   0   43.65    2.43
   4 -24   0   35.33    2.88
  -4 -24   0   46.39    2.53
   4  24   0   43.86    2.12
  -4 -24   0   42.85    2.79
   4 -24   0   46.29    2.26
   4 -24   0   46.31    2.42
  -4  24   0   44.77    2.16
  -4  24   0   39.43    2.44
  -4 -24   0   45.12    2.18
   4  24   0   40.79    2.21
   4  24   0   49.87    2.68
   5  24   0    0.90    0.90
   5 -24   0    0.40    0.98
   5 -24   0    1.32    1.08
  -5  24   0    0.63    0.88
   5 -24   0   -1.83    1.15
   5  24   0    3.09    1.41
  -5 -24   0    0.98    1.06
  -5 -24   0   -0.12    0.89
  -5  24   0    0.66    1.09
   6  24   0    0.03    1.44
   6 -24   0   -0.41    0.99
   6 -24   0    1.93    1.09
  -6  24   0    1.74    1.25
  -6 -24   0   -0.45    1.02
   6  24   0    0.62    0.87
  -6  24   0   -0.45    0.83
   7  24   0    4.55    1.74
   7 -24   0    3.50    1.09
  -7  24   0    5.39    1.82
   8 -24   0   17.10    2.96
   0  25   0   -0.19    1.01
   0 -25   0   -0.93    1.03
   0  25   0    1.14    0.86
   0 -25   0    1.35    1.17
   0 -25   0    1.19    0.92
   1  25   0   48.53    2.45
  -1 -25   0   49.54    2.69
   1 -25   0   44.31    2.92
  -1 -25   0   44.30    2.29
  -1  25   0   51.31    2.53
   1  25   0   53.91    2.66
  -1  25   0   48.96    2.28
   1  25   0   49.16    2.28
  -1 -25   0   48.35    2.96
   1 -25   0   44.15    2.58
   1 -25   0   48.39    2.37
   2  25   0    2.89    0.97
   2  25   0    5.89    1.45
  -2  25   0    3.82    1.11
  -2 -25   0    3.56    1.25
  -2  25   0    3.67    0.94
   2 -25   0    4.04    0.98
   2  25   0    3.31    0.94
  -2 -25   0    0.84    1.03
  -2 -25   0    2.16    0.96
   2 -25   0    3.45    1.19
   3  25   0   79.53    3.35
   3  25   0   85.21    3.24
   3 -25   0   78.95    4.00
   3 -25   0   83.28    3.48
   3  25   0   85.72    3.65
  -3  25   0   81.85    3.26
   3 -25   0   86.93    3.32
  -3  25   0   85.55    3.50
  -3 -25   0   85.59    3.26
  -3 -25   0   79.43    3.85
  -3 -25   0   83.21    3.57
  -4 -25   0   54.02    3.24
  -4  25   0   63.84    2.94
   4 -25   0   51.83    3.39
   4  25   0   53.66    2.63
  -4 -25   0   58.65    2.59
   4  25   0   64.02    3.12
  -4  25   0   57.28    2.60
   4 -25   0   56.99    2.85
   4 -25   0   60.39    2.68
   4  25   0   60.06    2.65
  -5 -25   0   13.83    2.21
  -5  25   0   10.70    1.19
   5 -25   0   10.12    1.26
   5 -25   0   10.66    1.36
  -5 -25   0    9.36    1.11
   5  25   0   10.89    1.46
  -5  25   0   11.28    1.50
   5  25   0   13.67    2.25
   6 -25   0   66.26    2.97
  -6  25   0   69.14    3.33
   6  25   0   71.62    3.40
   0 -26   0   70.77    2.96
   0 -26   0   74.53    3.27
   0  26   0   70.99    3.11
   0  26   0   67.23    2.90
   0 -26   0   64.89    3.55
   1  26   0    0.88    1.03
  -1 -26   0   -0.27    1.08
   1  26   0   -0.01    0.89
   1 -26   0    1.66    1.05
   1  26   0    2.74    1.38
  -1 -26   0    1.39    0.96
  -1 -26   0    0.68    1.31
  -1  26   0    0.22    1.08
   1 -26   0   -0.07    1.17
  -1  26   0    0.06    0.91
   1 -26   0   -0.18    1.08
  -2 -26   0   44.12    2.64
  -2 -26   0   36.38    2.79
   2  26   0   45.28    2.62
   2 -26   0   33.33    2.92
   2  26   0   40.69    2.14
   2 -26   0   41.99    2.25
  -2  26   0   39.67    2.19
  -2 -26   0   38.96    2.16
   2 -26   0   38.77    2.47
   2  26   0   35.33    2.25
  -2  26   0   42.28    2.48
  -3 -26   0   -0.17    1.01
   3 -26   0    1.40    1.08
   3  26   0    1.93    0.96
   3 -26   0   -0.32    1.21
  -3  26   0    2.11    0.98
  -3  26   0    1.62    1.20
   3  26   0    1.71    1.51
  -3 -26   0   -0.10    1.25
  -3 -26   0   -0.08    0.91
   3 -26   0   -0.84    1.14
   3  26   0    2.52    0.94
   4 -26   0   18.17    2.53
   4 -26   0   26.73    1.96
   4  26   0   30.78    2.54
  -4  26   0   26.14    1.80
  -4 -26   0   23.44    2.42
   4  26   0   24.44    2.57
  -4  26   0   27.92    2.25
   4 -26   0   24.08    2.10
   5 -26   0    1.93    1.08
   5  26   0    6.01    1.54
  -5  26   0   -0.40    1.26
  -6  26   0   28.96    2.44
   6 -26   0   28.10    2.01
   0 -27   0    0.34    1.31
   0 -27   0   -1.09    1.07
   0  27   0   -1.97    0.94
   0 -27   0    0.06    0.97
   0  27   0   -1.06    0.96
   1 -27   0   38.55    2.57
   1  27   0   39.96    2.36
   1 -27   0   39.51    2.43
  -1 -27   0   42.33    2.19
  -1 -27   0   41.48    2.72
   1  27   0   38.54    2.17
  -1 -27   0   33.88    2.75
   1 -27   0   35.20    2.78
  -1  27   0   40.40    2.40
  -1  27   0   39.98    2.21
  -2 -27   0    5.52    1.39
   2 -27   0    5.94    1.52
   2 -27   0    9.24    1.21
  -2 -27   0    9.67    1.61
  -2  27   0    7.60    1.12
  -2  27   0    8.59    1.34
   2 -27   0    6.90    1.43
  -3  27   0   24.54    2.18
   3 -27   0   20.55    2.05
  -3  27   0   23.54    2.07
   3  27   0   27.22    2.46
   3 -27   0   17.96    1.85
   4 -27   0   35.71    2.10
   4  27   0   37.04    2.69
  -4  27   0   32.41    2.41
  -5  27   0   39.05    2.76
   5 -27   0   36.62    2.42
   0 -28   0   10.31    1.61
   0  28   0    7.26    1.13
   1 -28   0    3.43    1.32
  -1  28   0    1.74    0.95
   1  28   0    0.83    1.00
  -1 -28   0    1.04    1.47
   2  28   0    4.17    1.03
   3  28   0    5.88    1.65
  -1 -29   0   31.40    3.35
   3   0  -1  210.96    7.04
   3   0   1  222.55    6.86
   3   0   1  217.86    7.08
   3   0  -1  219.98    6.86
  -3   0  -1  210.62    6.87
  -3   0   1  216.37    6.87
   3   0  -1  226.23    6.87
  -3   0   1  225.92    6.84
   3   0   1  209.96    6.85
   3   0   1  224.34    6.87
  -3   0   1  219.76    6.86
   3   0   1  221.95    6.85
   3   0  -1  224.41    6.85
  -3   0  -1  212.63    6.86
  -3   0  -1  216.33    6.93
   3   0  -1  222.53    6.93
   3   0  -1  224.23    6.84
   3   0   1  217.26    6.77
   3   0  -1  223.94    6.83
  -3   0   1  242.46    6.96
  -3   0   1  211.16    6.85
   3   0  -1  212.65    6.88
  -3   0  -1  219.85    6.77
  -3   0   1  227.13    6.86
  -3   0  -1  219.73    6.77
   3   0   1  219.54    6.77
   3   0   1  219.63    6.93
   3   0  -1  221.00    6.93
  -3   0   1  212.15    6.93
  -3   0  -1  211.47    6.85
  -4   0   1  105.38    3.57
  -4   0   1  114.46    3.56
   4   0   1  110.01    3.44
  -4   0   1  107.29    3.64
   4   0   1  109.83    3.43
   4   0   1  109.16    3.53
   4   0   1  114.33    3.53
  -4   0  -1  111.44    3.54
   4   0   1  110.50    3.85
  -4   0  -1  109.44    3.53
   4   0  -1  116.06    3.52
   4   0  -1  103.46    3.59
   4   0  -1  112.21    3.51
   4   0  -1  105.73    3.55
  -4   0  -1  107.00    3.44
   4   0  -1  109.68    3.62
  -4   0  -1  106.92    3.43
   4   0  -1  111.78    3.64
  -4   0  -1  110.09    3.66
  -4   0  -1  115.64    3.44
   4   0  -1  110.40    3.82
  -4   0   1  116.34    3.54
   4   0   1  113.03    3.54
  -4   0  -1  108.44    3.64
  -4   0   1  109.24    3.65
   4   0   1  114.77    3.65
  -4   0  -1  109.07    3.43
   4   0   1  113.41    3.43
   4   0   1  112.86    3.54
   4   0   1  107.91    3.44
  -4   0   1  110.57    3.54
  -4   0   1  110.73    3.51
   4   0  -1  110.39    3.53
  -5   0  -1   60.88    2.07
  -5   0  -1   63.69    1.94
   5   0  -1   60.84    2.20
  -5   0  -1   60.55    2.05
   5   0   1   63.77    1.93
  -5   0  -1   60.86    1.94
  -5   0   1   60.52    2.05
  -5   0   1   62.14    2.02
   5   0  -1   61.45    2.05
  -5   0   1   64.94    2.09
  -5   0   1   60.63    2.06
   5   0  -1   59.17    2.05
  -5   0  -1   59.70    1.93
  -5   0   1   61.30    2.03
   5   0   1   59.99    1.94
   5   0  -1   59.42    2.44
  -5   0  -1   62.08    1.93
   5   0   1   61.42    2.05
  -5   0   1   58.31    2.22
   5   0  -1   64.52    2.03
   5   0   1   62.47    1.94
  -5   0   1   62.74    2.05
   5   0   1   62.81    2.21
   5   0   1   62.90    2.04
  -5   0  -1   58.33    2.04
   5   0   1   58.95    2.45
   5   0   1   62.96    2.06
   5   0  -1   59.50    2.07
   5   0   1   63.79    2.05
   5   0  -1   60.19    2.17
   5   0   1   61.93    1.93
  -5   0   1   52.09    2.18
  -5   0  -1   59.94    2.23
   5   0  -1   60.14    2.01
   6   0  -1   -0.17    0.63
  -6   0  -1   -0.16    0.18
  -6   0  -1    0.13    0.14
  -6   0   1   -0.02    0.25
   6   0   1    0.63    0.29
  -6   0   1    0.26    0.31
   6   0  -1    0.38    0.36
  -6   0  -1   -0.07    0.33
   6   0   1    0.17    0.26
  -6   0   1    0.10    0.35
   6   0  -1    0.51    0.26
   6   0   1   -0.13    0.14
   6   0  -1   -0.11    0.23
   6   0   1    0.14    0.13
   6   0   1    0.26    0.30
   6   0   1    0.15    0.15
  -6   0   1    0.34    0.36
   6   0  -1   -0.28    0.29
  -6   0   1   -0.21    0.25
   6   0   1    0.17    0.25
   6   0  -1    0.02    0.24
   6   0  -1    0.32    0.43
  -6   0   1   -0.32    0.28
  -6   0  -1    0.17    0.30
   6   0   1    0.18    0.23
  -6   0  -1    0.17    0.15
   6   0  -1    0.11    0.31
  -6   0  -1   -0.03    0.35
  -6   0   1   -0.28    0.26
  -7   0  -1    0.50    0.43
  -7   0   1    0.89    0.39
   7   0  -1    0.62    0.29
  -7   0   1    0.33    0.43
  -7   0   1    0.79    0.33
  -7   0   1    1.57    0.44
  -7   0  -1    1.01    0.21
  -7   0  -1    0.83    0.23
  -7   0   1    0.67    0.30
  -7   0  -1    1.18    0.19
  -7   0   1    1.48    0.45
   7   0  -1    0.73    0.28
  -7   0  -1    0.85    0.18
   7   0  -1    0.59    0.37
   7   0  -1    0.59    0.74
  -7   0  -1    0.81    0.37
   7   0   1    0.69    0.36
   7   0   1    0.46    0.73
   7   0  -1    0.81    0.42
   7   0  -1    0.97    0.22
   7   0   1    0.92    0.23
   7   0   1    0.75    0.18
  -7   0  -1    1.27    0.39
   7   0   1    0.90    0.17
   7   0   1    0.41    0.28
  -7   0   1    0.58    0.30
   7   0   1    0.74    0.20
   8   0   1   15.14    0.64
  -8   0  -1   16.08    0.92
   8   0  -1   15.11    0.75
   8   0  -1   15.30    0.80
   8   0  -1   16.33    0.69
  -8   0   1   16.00    0.80
  -8   0   1   16.67    0.92
  -8   0  -1   15.20    0.68
  -8   0  -1   15.27    0.90
   8   0  -1   15.13    0.93
   8   0  -1   14.00    1.61
  -8   0   1   15.82    0.92
  -8   0  -1   15.98    1.26
   8   0   1   14.73    0.69
   8   0   1   14.46    1.61
  -8   0   1   16.85    0.96
   8   0   1   17.11    0.83
  -8   0   1   15.84    1.27
  -8   0   1   15.29    0.80
  -8   0  -1   15.07    0.64
  -8   0  -1   15.20    0.64
  -8   0  -1   15.65    0.62
  -8   0   1   16.14    0.85
   8   0  -1   15.69    0.89
   8   0   1   15.43    0.84
   8   0   1   15.21    0.63
   8   0   1   15.28    0.61
  -9   0   1   89.92    3.10
  -9   0   1   89.93    2.99
   9   0   1   83.94    3.80
   9   0  -1   92.02    3.02
  -9   0   1   90.53    3.10
  -9   0  -1   87.70    3.09
   9   0  -1   91.13    2.95
  -9   0   1   88.92    3.01
  -9   0  -1   90.57    3.08
   9   0   1   88.50    2.87
  -9   0  -1   89.17    2.87
   9   0  -1   89.92    2.89
  -9   0   1   90.08    2.98
   9   0  -1   85.72    3.07
  -9   0  -1   91.86    3.45
  -9   0  -1   88.56    2.85
   9   0   1   88.15    2.85
   9   0  -1   85.75    3.82
   9   0   1   89.50    2.89
  -9   0  -1   90.32    2.86
   9   0   1   92.39    3.00
   9   0   1   88.06    3.04
   9   0  -1   87.84    3.04
  -9   0   1   91.13    3.43
 -10   0   1    7.49    1.34
  10   0  -1   10.23    1.88
 -10   0  -1    7.84    1.34
 -10   0   1    8.01    0.71
 -10   0   1    8.39    0.90
 -10   0   1    9.00    0.97
  10   0  -1    7.83    0.60
 -10   0  -1    7.28    0.55
  10   0   1    8.14    1.79
 -10   0  -1    6.69    0.45
  10   0  -1    7.40    0.83
  10   0   1    7.19    0.77
 -10   0   1    8.88    0.80
  10   0  -1    7.56    0.90
 -10   0  -1    8.94    0.91
  10   0   1    6.95    0.58
 -10   0  -1    7.08    0.92
 -11   0  -1   13.84    1.10
 -11   0  -1   13.01    0.70
 -11   0   1   12.08    0.98
 -11   0  -1   13.52    1.11
  11   0  -1   11.83    1.16
  11   0   1   14.14    2.16
 -11   0  -1   13.44    1.59
 -11   0   1   12.75    1.09
  11   0   1   13.05    0.98
  11   0   1   13.15    0.72
  11   0  -1   12.72    1.09
 -11   0   1   13.84    1.62
  11   0  -1   15.69    2.28
 -11   0   1   12.98    1.21
 -12   0   1    5.80    0.89
 -12   0  -1    8.28    0.95
  12   0  -1   11.53    2.40
  12   0  -1    6.53    1.09
  12   0   1   11.52    2.34
 -12   0   1    4.88    1.00
 -12   0  -1    6.78    0.62
 -12   0   1    8.73    1.09
  12   0   1    8.35    0.96
 -12   0   1    8.10    0.90
 -12   0  -1    8.25    1.12
  12   0   1    6.68    0.63
  12   0  -1    8.03    0.96
  13   0   1    1.94    1.61
 -13   0   1    0.79    0.85
 -13   0   1    1.76    0.80
 -13   0   1    0.90    0.61
 -13   0  -1    1.57    0.79
  13   0  -1    2.13    0.82
 -13   0  -1   -0.39    0.79
 -13   0   1    0.61    0.93
  13   0  -1    0.94    0.67
 -14   0  -1    3.29    0.96
  14   0  -1    2.53    0.77
 -14   0   1    1.84    0.70
 -14   0   1    1.95    0.87
 -14   0  -1    2.04    0.81
 -14   0   1    1.96    1.06
  15   0  -1    3.79    0.74
 -15   0   1    5.40    0.77
   1  -1   1   18.36    0.74
  -1   1   1   18.68    0.70
   1  -1   1   19.24    0.64
   1  -1   1   17.58    0.78
  -1   1   1   16.95    0.74
   1  -1   1   18.03    0.70
   1  -1   1   19.05    0.63
  -1   1   1   18.90    0.70
   1  -1   1   19.43    0.73
  -1  -1  -1   19.13    0.71
   1   1  -1   18.59    0.68
  -1   1   1   18.76    0.76
   1   1  -1   18.37    0.69
   1   1  -1   18.18    0.77
  -1   1   1   18.65    0.68
   1   1  -1   18.93    0.72
  -1  -1  -1   18.84    0.69
  -1  -1  -1   18.85    0.73
  -1   1   1   19.59    0.70
  -1  -1  -1   18.69    0.62
  -1   1   1   19.12    0.75
   1  -1   1   16.76    0.71
  -1  -1  -1   19.28    0.68
  -1  -1  -1   19.40    0.63
  -1   1   1   19.13    0.68
   1   1  -1   19.60    0.71
  -1  -1  -1   18.29    0.67
   1   1   1   19.21    0.62
  -1  -1   1   18.92    0.70
   1   1   1   18.79    0.62
  -1   1  -1   17.83    0.82
  -1   1  -1   19.36    0.74
   1  -1  -1   17.79    0.68
  -1   1  -1   19.10    0.63
  -1   1  -1   19.63    0.64
  -1  -1   1   18.13    0.68
   1  -1  -1   19.53    0.76
   1  -1  -1   18.98    0.68
  -1   1  -1   18.53    0.80
   1  -1  -1   19.11    0.69
  -1  -1   1   19.23    0.70
  -1  -1   1   18.57    0.76
   1  -1  -1   19.85    0.69
   1   1   1   18.89    0.68
  -1  -1   1   17.19    0.79
  -1   1  -1   20.83    0.66
   1   1   1   18.94    0.66
  -1  -1   1   18.66    0.70
   1   1   1   18.67    0.63
   1   1   1   19.20    0.63
  -1   1  -1   19.47    0.64
   1   1   1   17.58    0.78
   1  -1  -1   17.66    0.77
   1   1   1   18.63    0.72
   1   1   1   19.36    0.69
   2   1  -1   82.06    2.74
  -2   1   1   82.34    2.70
   2  -1   1   80.43    2.78
   2   1  -1   82.92    2.63
   2   1  -1   88.80    2.64
   2  -1   1   82.41    2.56
  -2   1   1   84.88    2.64
  -2  -1  -1   81.54    2.61
   2  -1   1   80.53    2.56
   2   1  -1   79.61    2.61
   2   1  -1   83.91    2.62
   2   1  -1   76.09    2.77
   2  -1   1   83.57    2.56
  -2  -1  -1   85.18    2.65
  -2   1   1   81.61    2.77
  -2   1   1   83.62    2.69
   2  -1   1   82.45    2.68
   2  -1   1   85.16    2.62
  -2   1   1   87.36    2.63
   2  -1   1   84.88    2.62
   2   1  -1   85.02    2.68
  -2  -1  -1   81.79    2.61
  -2   1   1   79.47    2.62
  -2   1   1   87.00    2.60
  -2   1   1   80.87    2.66
  -2   1   1   75.27    2.67
   2  -1   1   84.40    2.57
  -2  -1  -1   82.64    2.67
   2  -1   1   84.55    2.67
   2   1  -1   81.71    2.66
   2   1   1   84.25    2.65
  -2   1  -1   85.25    2.80
   2   1   1   79.54    2.65
  -2   1  -1   81.90    2.57
   2   1   1   83.73    2.61
  -2  -1   1   82.59    2.62
   2  -1  -1   83.55    2.62
  -2  -1   1   82.29    2.66
  -2   1  -1   82.55    2.64
   2  -1  -1   88.51    2.63
  -2  -1   1   84.47    2.63
   2  -1  -1   74.32    2.74
   2  -1  -1   79.44    2.64
   2  -1  -1   71.81    2.70
   2  -1  -1   82.54    2.59
  -2  -1   1   80.13    2.67
   2   1   1   83.07    2.61
   2  -1  -1   85.74    2.70
  -2   1  -1   80.34    2.56
  -2  -1   1   81.64    2.69
  -2   1  -1   80.56    2.62
  -2  -1   1   80.26    2.63
   2  -1  -1   79.54    2.63
  -2   1  -1   81.18    2.56
  -3  -1  -1   99.56    3.20
  -3   1   1   95.54    3.10
   3  -1   1   94.77    3.04
  -3   1   1   96.00    3.12
  -3   1   1   97.10    3.31
   3   1  -1  102.57    3.10
  -3  -1  -1   97.14    3.10
   3   1  -1  100.98    3.18
   3  -1   1   96.88    3.03
   3   1  -1   92.82    3.11
   3  -1   1   96.98    3.03
  -3   1   1  101.40    3.12
  -3  -1  -1   96.18    3.13
   3  -1   1   96.37    3.03
  -3   1   1   95.60    3.19
   3   1  -1   96.43    3.11
  -3   1   1   99.07    3.12
   3   1  -1   99.04    3.10
  -3   1   1   96.17    3.19
   3   1  -1   94.66    3.14
   3  -1   1   97.09    3.09
   3  -1   1   98.00    3.11
  -3   1   1  101.20    3.10
   3  -1   1   95.95    3.34
   3  -1   1   99.33    3.19
   3  -1   1   99.66    3.10
   3  -1   1  101.59    3.12
   3   1  -1  100.17    3.19
  -3   1  -1   92.08    3.11
   3  -1  -1   97.56    3.19
  -3   1  -1   93.91    3.03
   3   1   1   96.13    3.13
   3  -1  -1   99.16    3.12
  -3  -1   1   93.69    3.10
   3   1   1   98.31    3.10
  -3  -1   1   98.92    3.15
   3  -1  -1   95.72    3.12
   3  -1  -1   95.90    3.11
  -3   1  -1   96.81    3.12
   3   1   1   98.71    3.13
  -3   1  -1   95.61    3.10
   3  -1  -1   97.96    3.05
  -3  -1   1   91.56    3.18
   3  -1  -1   97.62    3.10
  -3   1  -1   93.94    3.03
   3  -1  -1   98.58    3.19
  -3  -1   1  100.16    3.11
   3   1   1   97.92    3.18
   3   1   1   96.53    3.09
  -3   1  -1   96.67    3.03
   3  -1  -1   97.95    3.10
  -3   1  -1   96.85    3.20
  -3  -1   1   99.73    3.12
  -3   1  -1   99.52    3.04
  -3  -1   1  103.24    3.20
  -3  -1   1   97.69    3.09
   3   1   1   96.00    3.35
  -3   1  -1  100.26    3.35
   3  -1  -1   93.46    3.31
  -4   1   1   68.92    2.37
  -4  -1  -1   68.44    2.26
   4  -1   1   70.40    2.16
   4  -1   1   69.90    2.25
   4  -1   1   73.74    2.25
  -4  -1  -1   70.12    2.13
  -4   1   1   73.17    2.25
   4  -1   1   72.01    2.37
   4  -1   1   70.07    2.16
  -4   1   1   66.71    2.23
  -4   1   1   70.07    2.22
   4  -1   1   67.48    2.56
   4  -1   1   69.39    2.23
   4   1  -1   66.45    2.53
   4   1  -1   69.90    2.25
  -4  -1  -1   70.39    2.24
   4   1  -1   68.53    2.22
   4   1  -1   65.27    2.31
  -4   1   1   70.52    2.26
  -4  -1  -1   70.30    2.13
   4   1  -1   70.02    2.34
   4   1  -1   67.40    2.28
   4  -1   1   70.28    2.24
  -4  -1  -1   65.40    2.31
  -4  -1  -1   71.18    2.13
  -4  -1  -1   69.73    2.38
  -4   1   1   72.16    2.27
   4  -1   1   71.40    2.15
   4  -1   1   71.38    2.15
   4   1  -1   71.73    2.23
  -4  -1  -1   68.74    2.13
   4   1  -1   70.83    2.37
  -4  -1   1   65.33    2.33
   4  -1  -1   63.23    2.51
  -4   1  -1   68.77    2.16
   4  -1  -1   69.86    2.17
   4  -1  -1   67.08    2.22
   4   1   1   65.81    2.26
   4   1   1   66.19    2.24
  -4   1  -1   65.66    2.15
  -4   1  -1   69.02    2.58
  -4  -1   1   65.64    2.25
   4  -1  -1   66.20    2.35
   4  -1  -1   67.68    2.23
   4   1   1   66.84    2.13
  -4  -1   1   67.69    2.28
  -4   1  -1   69.84    2.24
   4  -1  -1   65.07    2.24
  -4   1  -1   67.01    2.15
  -4   1  -1   67.71    2.15
   4   1   1   64.87    2.26
   4   1   1   68.17    2.35
  -4  -1   1   62.01    2.28
  -4  -1   1   68.72    2.24
   4   1   1   67.22    2.13
  -4   1  -1   65.69    2.37
  -4  -1   1   68.13    2.22
   4  -1  -1   66.56    2.35
   4   1   1   64.12    2.55
  -4   1  -1   70.95    2.36
   4  -1  -1   65.82    2.26
   4   1   1   69.32    2.23
  -4  -1   1   64.45    2.36
   5  -1   1  101.00    3.15
  -5   1   1  103.18    3.25
   5   1  -1  103.45    3.22
  -5  -1  -1   97.45    3.26
  -5   1   1   97.28    3.38
  -5  -1  -1  103.69    3.14
   5   1  -1  102.39    3.41
  -5  -1  -1  101.64    3.14
  -5  -1  -1  101.71    3.26
  -5  -1  -1   98.36    3.13
   5   1  -1   99.77    3.35
  -5   1   1   99.63    3.41
   5  -1   1  103.81    3.24
   5   1  -1   97.70    3.62
  -5   1   1   99.49    3.25
  -5   1   1   99.57    3.23
  -5  -1  -1   98.63    3.24
  -5  -1  -1   98.21    3.41
   5  -1   1  103.97    3.40
   5  -1   1  101.03    3.15
  -5  -1  -1   98.40    3.13
  -5   1   1   99.59    3.22
   5  -1   1  103.25    3.25
   5  -1   1  101.54    3.14
   5   1  -1   97.55    3.24
  -5   1   1   98.09    3.24
   5  -1   1  106.18    3.15
   5   1  -1   99.01    3.21
   5  -1   1  102.78    3.26
   5  -1   1   96.25    3.63
   5   1  -1  102.68    3.24
  -5   1   1  103.81    3.26
   5  -1   1  101.31    3.23
   5   1   1  101.56    3.13
  -5   1  -1  105.89    3.16
  -5   1  -1   98.93    3.23
  -5   1  -1   99.16    3.15
   5  -1  -1   94.43    3.36
   5   1   1   98.09    3.26
   5  -1  -1  102.54    3.25
   5  -1  -1   98.05    3.26
   5   1   1   98.98    3.14
  -5  -1   1  104.50    3.30
   5   1   1   96.54    3.64
  -5  -1   1   97.91    3.41
   5  -1  -1   99.05    3.39
   5   1   1   98.64    3.25
  -5  -1   1   99.19    3.39
   5   1   1  102.09    3.26
  -5   1  -1   96.69    3.14
   5  -1  -1  102.25    3.22
   5   1   1  100.68    3.39
  -5   1  -1  100.05    3.14
   5   1   1  103.43    3.24
   5  -1  -1   97.74    3.22
   5  -1  -1   95.17    3.61
  -5  -1   1  100.88    3.23
  -5  -1   1  100.83    3.21
  -5  -1   1  104.37    3.24
  -5  -1   1  100.19    3.24
  -5   1  -1   99.48    3.42
  -5   1  -1   99.64    3.26
   5  -1  -1   98.92    3.25
   6   1  -1   33.79    1.31
   6   1  -1   34.09    1.40
   6   1  -1   35.70    1.34
  -6   1   1   36.19    1.38
  -6  -1  -1   32.98    1.23
   6  -1   1   37.56    1.33
  -6   1   1   36.99    1.36
   6   1  -1   33.98    1.84
   6   1  -1   35.42    1.31
   6   1  -1   34.94    1.54
   6  -1   1   36.12    1.33
   6  -1   1   35.99    1.25
  -6   1   1   36.42    1.32
  -6  -1  -1   36.97    1.23
  -6  -1  -1   35.21    1.21
   6  -1   1   36.24    1.22
   6  -1   1   35.08    1.53
  -6  -1  -1   35.17    1.60
   6  -1   1   32.24    1.81
  -6  -1  -1   34.76    1.38
  -6   1   1   35.48    1.34
  -6  -1  -1   37.39    1.38
   6  -1   1   36.77    1.23
   6  -1   1   36.06    1.24
  -6  -1  -1   35.99    1.22
  -6   1   1   36.90    1.36
   6   1  -1   34.28    1.37
  -6  -1  -1   34.94    1.37
   6  -1   1   37.76    1.40
   6   1  -1   33.87    1.49
  -6   1   1   34.33    1.59
  -6   1   1   37.89    1.39
   6  -1  -1   36.48    1.37
   6   1   1   40.41    1.37
  -6   1  -1   38.62    1.62
  -6  -1   1   38.52    1.35
   6   1   1   38.87    1.21
  -6  -1   1   38.90    1.35
   6  -1  -1   36.26    1.84
  -6   1  -1   38.37    1.39
  -6   1  -1   39.83    1.25
   6  -1  -1   40.26    1.36
  -6   1  -1   40.68    1.26
   6   1   1   41.75    1.41
  -6  -1   1   38.31    1.36
   6  -1  -1   38.98    1.56
   6   1   1   38.43    1.34
   6   1   1   40.27    1.41
  -6  -1   1   41.04    1.44
   6   1   1   35.51    1.89
   6  -1  -1   39.22    1.54
  -6   1  -1   39.75    1.23
  -6  -1   1   38.86    1.40
   6   1   1   37.96    1.55
   6  -1  -1   38.23    1.33
  -6   1  -1   39.14    1.24
  -6  -1   1   38.56    1.33
  -6  -1   1   39.85    1.60
  -6  -1   1   38.30    1.61
   6  -1  -1   39.21    1.24
  -6   1  -1   39.66    1.34
   6   1   1   37.30    1.26
   6  -1  -1   39.15    1.32
  -7   1   1   19.44    0.94
  -7   1   1   17.92    0.91
  -7  -1  -1   19.02    0.70
   7  -1   1   17.30    1.02
  -7  -1  -1   17.89    0.66
   7  -1   1   19.31    0.70
   7   1  -1   18.87    0.79
   7  -1   1   18.95    0.81
   7  -1   1   18.71    0.73
   7   1  -1   16.44    1.48
   7   1  -1   18.59    0.82
  -7   1   1   18.70    0.83
   7  -1   1   18.61    0.67
   7   1  -1   17.75    0.88
  -7  -1  -1   18.45    0.88
  -7   1   1   18.74    0.86
  -7   1   1   19.81    0.92
  -7  -1  -1   18.54    0.68
  -7  -1  -1   18.40    0.89
   7   1  -1   16.87    0.94
  -7  -1  -1   18.28    0.68
  -7  -1  -1   17.55    1.18
  -7  -1  -1   17.85    0.91
   7  -1   1   14.94    1.41
  -7   1   1   17.33    0.84
  -7   1   1   18.46    1.20
   7  -1   1   18.75    0.69
  -7   1  -1   18.71    1.20
  -7  -1   1   17.17    0.84
  -7  -1   1   17.19    0.83
  -7   1  -1   17.85    0.91
   7  -1  -1   18.28    0.84
  -7  -1   1   18.18    0.91
   7   1   1   17.94    0.89
  -7  -1   1   17.93    0.80
   7  -1  -1   18.15    0.85
   7   1   1   19.67    0.84
   7  -1  -1   18.03    0.90
  -7  -1   1   18.79    0.92
  -7   1  -1   18.96    0.70
  -7  -1   1   17.37    1.17
  -7  -1   1   18.63    0.96
  -7   1  -1   18.86    0.68
  -7   1  -1   18.81    0.70
   7   1   1   18.35    0.65
   7   1   1   16.80    1.47
   7  -1  -1   16.11    1.43
  -7   1  -1   18.75    0.73
  -7   1  -1   17.79    0.91
   7   1   1   17.67    0.70
   7  -1  -1   18.08    0.79
   7  -1  -1   17.28    0.89
  -8   1   1  163.74    5.21
   8  -1   1  159.32    5.09
   8  -1   1  159.58    5.09
   8   1  -1  157.70    5.27
  -8  -1  -1  159.82    5.06
  -8  -1  -1  160.35    5.24
  -8   1   1  163.69    5.26
  -8   1   1  167.87    5.18
  -8   1   1  161.48    5.53
   8  -1   1  180.18    5.12
   8   1  -1  163.56    5.14
   8   1  -1  159.58    5.21
  -8  -1  -1  162.74    5.08
   8   1  -1  167.52    5.21
   8  -1   1  156.62    5.19
  -8  -1  -1  161.31    5.06
   8  -1   1  150.35    5.85
   8  -1   1  168.42    5.18
  -8  -1  -1  158.55    5.51
   8   1  -1  156.04    5.87
  -8   1   1  163.89    5.27
  -8  -1  -1  155.61    5.26
  -8   1   1  159.39    5.18
   8   1  -1  163.00    5.16
  -8  -1  -1  160.77    5.08
   8  -1   1  162.87    5.07
  -8   1   1  156.48    5.24
  -8   1  -1  162.82    5.26
   8  -1  -1  162.20    5.16
   8   1   1  157.12    5.24
  -8  -1   1  161.59    5.24
  -8   1  -1  181.53    5.13
   8   1   1  163.70    5.06
  -8  -1   1  165.09    5.21
  -8   1  -1  159.36    5.08
   8  -1  -1  159.68    5.24
  -8   1  -1  167.21    5.10
  -8   1  -1  159.54    5.07
  -8   1  -1  155.00    5.25
  -8  -1   1  159.07    5.18
   8   1   1  167.82    5.21
  -8   1  -1  159.25    5.52
   8  -1  -1  154.30    5.85
  -8  -1   1  158.60    5.52
  -8  -1   1  159.76    5.25
   8  -1  -1  164.05    5.22
   8   1   1  155.61    5.88
   8  -1  -1  165.84    5.21
  -8  -1   1  168.40    5.17
   8   1   1  161.79    5.08
  -9  -1  -1   70.44    2.60
  -9   1   1   72.86    2.51
  -9  -1  -1   71.97    2.34
   9  -1   1   76.00    2.48
   9   1  -1   73.75    2.51
  -9   1   1   75.51    2.63
   9   1  -1   74.23    2.43
   9  -1   1   74.42    2.35
  -9  -1  -1   70.21    2.91
  -9  -1  -1   72.52    2.36
  -9   1   1   73.16    2.51
   9  -1   1   70.19    3.37
   9  -1   1   74.79    2.40
  -9   1   1   72.41    2.94
   9   1  -1   72.04    2.45
  -9   1   1   72.81    2.60
   9   1  -1   72.62    2.54
   9  -1   1   72.46    2.37
  -9  -1  -1   71.99    2.35
   9  -1   1   73.02    2.52
  -9   1   1   72.92    2.49
  -9  -1  -1   72.85    2.58
   9   1  -1   72.24    2.63
   9   1  -1   70.52    3.38
   9  -1  -1   69.42    3.36
   9   1   1   70.97    3.39
  -9  -1   1   71.12    2.60
  -9   1  -1   73.79    2.38
   9   1   1   73.03    2.34
  -9  -1   1   73.67    2.51
   9  -1  -1   75.18    2.52
  -9   1  -1   74.93    2.37
   9   1   1   72.80    2.38
  -9  -1   1   73.51    2.48
  -9   1  -1   72.63    2.36
   9  -1  -1   72.10    2.45
  -9   1  -1   74.10    2.60
   9   1   1   73.11    2.52
  -9   1  -1   74.03    2.95
   9  -1  -1   71.59    2.58
  -9  -1   1   73.68    2.95
  -9  -1   1   72.19    2.59
  -9  -1   1   75.03    2.51
   9   1   1   71.72    2.56
   9  -1  -1   72.58    2.54
  -9   1  -1   69.44    2.59
  10  -1   1  163.05    5.21
 -10   1   1  169.31    5.36
 -10  -1  -1  163.84    5.45
  10   1  -1  166.41    5.37
  10  -1   1  166.35    5.22
 -10   1   1  165.67    5.33
 -10  -1  -1  168.40    5.82
 -10   1   1  167.74    5.82
  10   1  -1  168.91    5.29
  10   1  -1  157.30    6.22
 -10   1   1  164.82    5.45
 -10  -1  -1  165.24    5.19
 -10  -1  -1  165.08    5.43
 -10  -1  -1  160.44    5.18
  10   1  -1  157.20    5.44
  10  -1   1  161.81    6.27
 -10   1   1  167.97    5.45
  10  -1   1  160.85    5.35
 -10   1  -1  153.57    5.24
 -10  -1   1  168.32    5.44
 -10   1  -1  165.14    5.45
  10  -1  -1  163.74    5.41
  10   1   1  167.88    5.26
 -10  -1   1  169.89    5.33
  10  -1  -1  163.98    5.37
  10   1   1  171.61    5.54
  10   1   1  168.39    5.49
  10  -1  -1  161.94    6.28
 -10  -1   1  167.58    5.35
 -10  -1   1  162.60    5.44
 -10   1  -1  163.76    5.43
 -10  -1   1  168.29    5.81
  10   1   1  164.54    5.19
  10   1   1  159.05    6.24
  10  -1  -1  166.29    5.30
 -10   1  -1  166.83    5.82
 -10   1  -1  166.52    5.20
  10  -1  -1  168.16    5.15
 -11  -1  -1   46.06    1.55
 -11  -1  -1   45.65    2.40
  11  -1   1   43.99    1.76
 -11   1   1   44.00    1.91
 -11   1   1   44.99    2.41
  11   1  -1   47.41    3.02
  11  -1   1   45.83    1.60
 -11  -1  -1   44.19    2.26
  11   1  -1   45.02    1.88
  11  -1   1   46.61    2.98
 -11  -1  -1   44.40    1.92
 -11   1   1   46.01    1.95
 -11   1   1   41.44    1.96
  11   1  -1   43.05    1.91
  11  -1  -1   47.16    3.06
 -11   1  -1   44.24    1.92
  11  -1  -1   42.48    1.86
 -11   1  -1   45.44    1.58
 -11  -1   1   44.51    1.92
  11   1   1   46.33    1.58
  11  -1  -1   41.55    2.37
  11   1   1   43.94    1.85
 -11  -1   1   44.13    2.39
 -11   1  -1   44.58    1.92
  11   1   1   46.59    2.95
 -11  -1   1   46.86    1.79
 -12   1   1  139.46    4.84
 -12  -1  -1  142.91    5.36
 -12   1   1  140.71    4.67
  12  -1   1  135.49    4.71
  12  -1   1  143.27    5.97
  12   1  -1  143.71    4.73
 -12  -1  -1  139.42    4.49
 -12   1   1  141.64    4.86
 -12  -1  -1  138.17    4.86
 -12  -1  -1  142.79    4.84
  12  -1   1  140.18    4.54
  12   1  -1  140.95    4.86
 -12   1   1  139.27    5.34
  12   1  -1  145.57    6.05
 -12  -1   1  146.86    4.68
  12   1   1  144.98    6.01
  12  -1  -1  142.60    4.81
 -12  -1   1  143.50    4.85
 -12   1  -1  140.63    4.86
  12   1   1  143.53    4.51
 -12  -1   1  145.90    5.37
  12  -1  -1  139.98    4.72
  12  -1  -1  145.05    6.02
  12   1   1  139.90    4.78
 -12   1  -1  142.32    4.52
 -12  -1   1  140.97    4.87
 -12   1  -1  142.86    4.86
 -13   1   1   11.20    1.40
 -13  -1  -1   11.29    1.33
  13  -1   1   14.62    2.65
 -13  -1  -1    9.99    1.30
 -13   1   1    8.65    1.03
 -13   1   1   12.30    1.29
  13   1  -1    8.65    1.10
  13  -1   1    9.88    0.87
  13  -1  -1   10.89    1.11
 -13  -1   1    7.29    1.20
 -13  -1   1   10.03    1.28
 -13   1  -1    9.60    1.32
 -13  -1   1    9.50    1.08
 -13  -1   1   11.73    1.19
 -13   1  -1   10.29    1.28
  14   1  -1   65.26    2.70
 -14   1   1   71.81    2.69
 -14   1   1   69.91    2.97
  14   1  -1   80.31    4.57
  14  -1   1   75.89    4.27
 -14  -1  -1   71.01    2.96
 -14   1   1   69.16    2.90
 -14  -1  -1   71.39    2.92
  14  -1  -1   78.16    4.54
  14   1   1   83.36    4.36
 -14   1  -1   70.09    2.94
 -14  -1   1   69.23    2.91
 -14  -1   1   66.56    2.98
 -14  -1   1   71.11    2.67
  14  -1  -1   71.18    2.73
 -14   1  -1   71.18    2.96
  15   1  -1    8.71    1.12
 -15   1   1    6.19    0.82
 -15  -1   1    8.91    1.13
  15  -1  -1    7.34    1.04
   1  -2   1  181.31    5.48
  -1  -2  -1  175.95    5.49
  -1  -2  -1  173.33    5.46
  -1  -2  -1  181.11    5.50
   1  -2   1  176.51    5.47
   1   2  -1  177.14    5.50
   1  -2   1  177.83    5.46
   1  -2   1  150.21    5.55
   1  -2   1  154.09    5.47
   1  -2   1  173.30    5.59
  -1  -2  -1  180.93    5.45
  -1   2   1  166.16    5.55
   1  -2   1  169.82    5.55
  -1  -2  -1  174.26    5.46
   1   2  -1  164.06    5.53
  -1  -2  -1  177.57    5.46
  -1   2   1  184.25    5.50
   1  -2   1  179.43    5.47
   1   2  -1  184.31    5.52
  -1  -2  -1  177.83    5.52
   1   2  -1  186.26    5.53
  -1   2   1  180.93    5.48
  -1   2   1  176.88    5.50
  -1   2   1  181.94    5.48
   1   2  -1  163.30    5.57
   1   2  -1  171.79    5.51
  -1   2   1  184.97    5.53
  -1  -2   1  178.62    5.50
   1   2   1  178.93    5.46
   1  -2  -1  172.77    5.50
   1   2   1  178.97    5.49
   1   2   1  184.11    5.50
   1   2   1  179.17    5.48
  -1   2  -1  179.33    5.47
  -1   2  -1  171.13    5.49
  -1   2  -1  177.87    5.48
  -1  -2   1  182.53    5.52
   1  -2  -1  172.98    5.48
   1  -2  -1  173.16    5.57
   1  -2  -1  165.57    5.57
   1   2   1  180.83    5.46
  -1  -2   1  201.81    5.54
   1  -2  -1  177.40    5.48
   1  -2  -1  166.94    5.59
  -1  -2   1  166.75    5.55
  -1   2  -1  184.66    5.52
  -1  -2   1  174.49    5.48
   1  -2  -1  180.18    5.50
   1   2   1  178.93    5.45
  -1   2  -1  183.74    5.49
  -1   2  -1  175.13    5.58
  -1   2  -1  180.86    5.46
   1   2   1  170.37    5.52
   1   2   1  180.56    5.46
   1   2   1  178.77    5.45
   1  -2  -1  177.51    5.48
  -1   2  -1  181.51    5.46
  -1  -2   1  152.60    5.50
  -1  -2   1  168.94    5.52
  -1   2  -1  178.04    5.55
  -2   2   1  374.50   11.35
   2  -2   1  366.10   11.34
   2   2  -1  371.72   11.40
   2   2  -1  368.51   11.34
   2  -2   1  357.35   11.39
   2   2  -1  371.28   11.39
   2  -2   1  346.15   11.49
   2  -2   1  357.04   11.40
  -2   2   1  323.88   11.53
  -2   2   1  352.71   11.33
   2   2  -1  344.39   11.37
  -2  -2  -1  355.24   11.33
  -2   2   1  372.23   11.34
   2   2  -1  349.82   11.33
  -2  -2  -1  357.37   11.38
  -2   2   1  414.64   11.42
  -2  -2  -1  365.14   11.37
   2   2  -1  368.67   11.35
  -2   2  -1  360.91   11.34
   2   2   1  372.80   11.36
   2  -2  -1  371.86   11.35
   2   2   1  366.49   11.37
  -2  -2   1  390.68   11.35
   2   2   1  367.96   11.39
  -2  -2   1  357.79   11.35
  -2   2  -1  363.08   11.34
  -2  -2   1  368.66   11.38
   2  -2  -1  364.28   11.35
  -2   2  -1  376.57   11.36
   2   2   1  364.47   11.37
   2  -2  -1  378.68   11.40
  -2  -2   1  361.08   11.40
   2   2   1  374.23   11.33
   2   2   1  365.23   11.33
   2  -2  -1  348.43   11.46
  -2  -2   1  370.80   11.34
  -2  -2   1  360.31   11.37
   2  -2  -1  387.72   11.34
  -2   2  -1  368.26   11.50
  -2   2  -1  378.28   11.31
  -2  -2   1  363.73   11.39
   3  -2   1   43.53    1.37
   3  -2   1   42.79    1.40
  -3   2   1   47.74    1.57
  -3  -2  -1   41.33    1.43
   3   2  -1   42.74    1.44
   3   2  -1   42.29    1.45
  -3   2   1   41.55    1.68
   3  -2   1   40.11    1.67
  -3  -2  -1   42.68    1.33
   3  -2   1   43.16    1.44
  -3  -2  -1   42.83    1.33
  -3   2   1   43.61    1.46
  -3   2   1   43.69    1.45
   3   2  -1   42.89    1.42
   3  -2   1   45.97    1.44
  -3   2   1   42.69    1.43
  -3   2   1   44.29    1.45
   3   2  -1   44.62    1.52
   3  -2   1   43.09    1.43
   3  -2   1   42.73    1.37
   3  -2   1   43.93    1.54
  -3  -2  -1   42.04    1.53
   3   2  -1   43.52    1.43
   3  -2   1   43.07    1.36
  -3  -2  -1   41.90    1.42
   3   2  -1   40.19    1.49
   3   2  -1   44.65    1.55
  -3   2   1   41.19    1.53
   3  -2   1   42.80    1.36
  -3   2   1   40.58    1.43
  -3  -2  -1   43.18    1.47
  -3  -2  -1   44.00    1.33
  -3   2   1   41.77    1.41
  -3  -2   1   40.63    1.54
   3   2   1   42.06    1.33
   3   2   1   42.23    1.46
  -3  -2   1   41.57    1.49
   3  -2  -1   44.99    1.55
   3  -2  -1   41.38    1.45
   3   2   1   42.88    1.52
   3  -2  -1   42.91    1.35
   3   2   1   41.55    1.33
   3  -2  -1   38.13    1.64
  -3   2  -1   42.82    1.72
   3  -2  -1   40.88    1.52
  -3   2  -1   43.51    1.45
  -3  -2   1   44.55    1.53
  -3  -2   1   41.26    1.45
   3   2   1   41.50    1.33
   3  -2  -1   41.00    1.44
  -3   2  -1   42.80    1.37
  -3   2  -1   42.81    1.36
  -3   2  -1   40.12    1.44
  -3   2  -1   40.28    1.43
   3   2   1   40.06    1.47
  -3  -2   1   43.91    1.42
   3   2   1   43.39    1.42
  -3  -2   1   38.29    1.42
  -3  -2   1   43.04    1.45
   3  -2  -1   44.36    1.43
   3   2   1   41.91    1.43
   3  -2  -1   39.95    1.45
  -4  -2  -1  103.40    3.37
  -4  -2  -1  103.92    3.28
  -4   2   1  108.04    3.37
   4  -2   1  102.99    3.31
  -4   2   1  102.96    3.37
  -4  -2  -1  103.72    3.28
  -4  -2  -1   94.11    3.46
  -4  -2  -1  102.70    3.41
   4  -2   1  106.19    3.38
  -4   2   1   93.26    3.44
  -4   2   1  101.97    3.50
   4  -2   1  103.38    3.35
   4  -2   1  103.94    3.30
  -4  -2  -1  104.92    3.28
  -4   2   1  105.35    3.38
  -4  -2  -1  104.42    3.41
   4   2  -1  104.83    3.38
   4  -2   1  105.07    3.37
   4   2  -1  103.14    3.36
   4  -2   1  105.70    3.30
  -4   2   1  100.45    3.83
   4   2  -1  106.38    3.51
  -4   2   1  106.28    3.39
  -4  -2  -1  106.78    3.28
   4  -2   1  104.22    3.31
  -4   2   1  107.87    3.69
   4  -2   1  106.30    3.50
   4  -2   1  106.94    3.39
  -4  -2  -1  105.46    3.51
   4   2  -1  104.53    3.36
   4   2  -1  112.23    3.48
   4   2  -1   99.10    3.42
  -4   2   1  106.52    3.40
   4  -2   1   97.05    3.82
   4   2   1  111.52    3.51
  -4  -2   1  107.61    3.39
  -4   2  -1  110.86    3.32
  -4  -2   1  103.20    3.51
   4   2   1  106.40    3.28
   4  -2  -1   92.43    3.53
   4  -2  -1  108.77    3.39
  -4  -2   1  104.48    3.46
   4  -2  -1  108.42    3.50
  -4   2  -1  105.81    3.30
  -4   2  -1  105.55    3.47
   4   2   1  108.55    3.28
   4   2   1  111.07    3.37
   4   2   1  110.79    3.41
   4  -2  -1   98.64    3.64
  -4  -2   1  109.83    3.36
   4  -2  -1  105.29    3.38
   4   2   1  107.33    3.28
  -4   2  -1  107.68    3.38
  -4  -2   1  109.42    3.44
  -4  -2   1  113.62    3.39
   4  -2  -1  111.22    3.29
   4  -2  -1  106.03    3.37
   4   2   1  106.09    3.28
   4  -2  -1  111.01    3.37
   4   2   1  104.79    3.42
  -4   2  -1  110.58    3.73
   4  -2  -1  109.44    3.50
   4   2   1  107.69    3.38
   5  -2   1  156.53    5.09
   5  -2   1  154.11    4.90
   5  -2   1  151.94    4.86
   5   2  -1  156.55    4.91
   5  -2   1  156.43    4.94
  -5  -2  -1  151.14    4.82
   5  -2   1  158.08    4.92
  -5   2   1  164.74    4.95
   5   2  -1  155.06    5.03
   5  -2   1  147.45    5.31
   5   2  -1  150.03    4.93
   5   2  -1  154.87    4.93
   5   2  -1  156.42    5.09
   5   2  -1  155.76    4.91
  -5  -2  -1  155.58    4.97
   5  -2   1  159.70    4.85
   5   2  -1  149.67    5.32
  -5   2   1  151.41    4.93
  -5  -2  -1  152.54    4.93
  -5   2   1  153.97    5.10
  -5  -2  -1  157.67    4.83
  -5   2   1  158.53    4.95
   5  -2   1  155.31    4.86
  -5   2   1  159.59    5.32
  -5   2   1  153.95    4.92
   5   2  -1  147.59    4.98
   5  -2   1  154.53    4.84
  -5  -2  -1  155.49    4.83
  -5  -2  -1  152.23    4.83
  -5   2   1  157.32    4.91
  -5  -2  -1  153.53    5.10
  -5   2   1  159.55    4.94
  -5  -2  -1  152.21    4.95
  -5   2  -1  152.26    4.85
   5  -2  -1  159.88    4.82
  -5  -2   1  159.07    4.94
  -5  -2   1  164.82    4.94
   5  -2  -1  152.11    4.94
   5   2   1  157.48    4.96
   5  -2  -1  152.24    5.06
  -5  -2   1  154.08    4.92
  -5   2  -1  154.57    4.91
   5  -2  -1  158.71    4.92
  -5   2  -1  153.25    5.11
   5  -2  -1  145.81    5.28
  -5   2  -1  160.56    4.86
   5   2   1  156.92    4.82
   5  -2  -1  152.55    4.94
  -5   2  -1  151.65    4.95
   5  -2  -1  157.19    4.91
   5   2   1  153.76    4.94
  -5   2  -1  161.07    5.34
  -5  -2   1  159.91    4.91
   5   2   1  150.03    5.33
   5  -2  -1  156.02    5.08
  -5  -2   1  151.31    5.07
  -5  -2   1  156.54    5.11
   5   2   1  161.10    5.09
   5   2   1  158.07    4.83
   5   2   1  155.22    4.83
   5   2   1  155.99    4.82
  -5   2  -1  152.35    4.95
   5  -2  -1  150.88    4.93
  -5  -2   1  163.63    5.00
   5   2   1  163.26    4.93
  -6  -2  -1   35.37    1.56
  -6   2   1   37.13    1.32
   6   2  -1   34.28    1.38
   6   2  -1   33.96    1.82
  -6   2   1   37.46    1.28
   6   2  -1   36.55    1.27
  -6   2   1   36.71    1.30
   6   2  -1   35.32    1.52
  -6  -2  -1   35.72    1.31
  -6   2   1   35.09    1.32
  -6  -2  -1   34.60    1.20
   6  -2   1   36.88    1.17
  -6  -2  -1   37.12    1.36
  -6   2   1   35.04    1.30
  -6   2   1   34.65    1.56
  -6  -2  -1   36.28    1.17
   6   2  -1   36.27    1.29
  -6  -2  -1   35.33    1.35
  -6   2   1   34.60    1.30
   6   2  -1   33.39    1.43
   6  -2   1   35.40    1.19
  -6  -2  -1   36.08    1.17
   6  -2   1   37.88    1.41
   6  -2   1   35.51    1.52
   6   2  -1   34.23    1.25
   6  -2   1   35.95    1.25
   6  -2   1   36.44    1.18
   6   2  -1   35.21    1.32
   6  -2   1   31.56    1.79
   6  -2   1   35.40    1.20
   6  -2   1   37.64    1.27
  -6  -2  -1   35.81    1.15
   6   2   1   36.70    1.29
   6   2   1   31.26    1.27
   6   2   1   34.67    1.36
   6  -2  -1   33.63    1.13
   6   2   1   35.44    1.15
  -6  -2   1   35.91    1.27
  -6  -2   1   34.47    1.34
  -6  -2   1   34.19    1.29
   6  -2  -1   33.61    1.49
   6  -2  -1   36.47    1.13
   6  -2  -1   33.71    1.32
   6  -2  -1   34.72    1.30
   6  -2  -1   34.57    1.28
  -6   2  -1   34.65    1.56
   6  -2  -1   34.66    1.26
   6   2   1   34.57    1.48
   6  -2  -1   32.77    1.79
   6  -2  -1   32.96    1.61
  -6  -2   1   34.52    1.29
  -6  -2   1   34.38    1.30
  -6  -2   1   37.64    1.40
   6   2   1   36.07    1.15
   6  -2  -1   36.72    1.30
  -6   2  -1   35.45    1.19
  -6   2  -1   34.52    1.25
  -6   2  -1   34.05    1.33
  -6  -2   1   34.70    1.51
   6   2   1   36.36    1.16
  -6  -2   1   34.01    1.55
  -6   2  -1   34.13    1.34
  -6   2  -1   38.05    1.22
   6   2   1   36.12    1.31
   6   2   1   33.04    1.84
  -7   2   1   84.41    2.90
  -7  -2  -1   85.03    3.14
  -7  -2  -1   83.68    2.91
  -7  -2  -1   87.85    2.74
   7  -2   1   89.20    2.77
  -7  -2  -1   87.34    2.74
  -7  -2  -1   88.17    2.74
  -7  -2  -1   86.07    2.73
   7   2  -1   83.76    3.47
   7  -2   1   85.28    2.82
   7   2  -1   83.65    2.95
  -7   2   1   87.91    2.86
  -7  -2  -1   86.01    2.89
   7  -2   1   84.91    2.75
   7  -2   1   86.91    2.78
  -7   2   1   86.70    3.16
  -7   2   1   87.73    2.88
   7  -2   1   80.41    3.43
  -7   2   1   86.90    2.92
   7   2  -1   85.20    2.88
   7   2  -1   86.45    2.86
   7  -2   1   90.15    2.76
  -7   2   1   88.33    2.84
   7   2  -1   86.48    2.83
  -7   2   1   92.44    2.91
   7  -2   1   90.28    2.83
  -7  -2  -1   88.16    2.93
  -7   2  -1   84.23    2.91
   7  -2  -1   85.87    2.87
  -7  -2   1   88.20    2.84
   7   2   1   87.12    2.75
  -7  -2   1   86.81    2.89
   7  -2  -1   85.05    2.88
   7   2   1   87.34    2.89
   7   2   1   85.92    2.72
   7   2   1   83.24    3.48
   7  -2  -1   84.84    2.70
  -7   2  -1   85.16    2.91
  -7  -2   1   86.70    2.85
  -7  -2   1   86.32    3.16
  -7  -2   1   87.96    2.87
  -7   2  -1   85.33    2.76
   7  -2  -1   87.38    2.70
  -7   2  -1   91.03    2.79
   7   2   1   87.12    2.73
   7   2   1   81.08    2.96
  -7   2  -1   85.28    3.16
   7  -2  -1   86.55    2.83
  -7  -2   1   85.49    2.91
   7  -2  -1   81.62    3.42
   7   2   1   85.78    2.93
   7  -2  -1   84.82    2.88
   7   2   1   87.46    2.74
  -7  -2   1   88.73    2.97
  -8   2   1   16.41    1.29
  -8  -2  -1   14.50    0.64
  -8  -2  -1   15.60    0.62
  -8   2   1   16.61    0.89
  -8   2   1   15.35    0.91
  -8   2   1   15.24    0.96
  -8   2   1   15.25    0.80
  -8  -2  -1   15.15    1.24
   8   2  -1   15.32    0.89
   8  -2   1   14.91    0.77
   8  -2   1   15.44    0.70
  -8  -2  -1   15.22    0.91
   8   2  -1   14.71    0.97
   8   2  -1   15.65    0.75
   8  -2   1   16.20    0.75
  -8   2   1   15.33    0.84
  -8  -2  -1   15.73    0.63
   8   2  -1   17.82    0.77
   8   2  -1   14.08    0.79
   8   2  -1   12.93    1.63
   8  -2   1   14.89    0.61
   8  -2   1   15.33    0.65
  -8   2   1   16.39    0.81
  -8  -2  -1   15.16    0.59
   8  -2   1   12.35    1.55
  -8  -2  -1   15.08    0.89
   8   2   1   15.37    0.91
  -8  -2   1   14.18    1.25
  -8  -2   1   15.60    0.80
   8  -2  -1   14.61    0.89
   8   2   1   15.37    0.83
  -8   2  -1   15.73    0.92
  -8  -2   1   14.80    0.83
   8   2   1   14.64    0.59
  -8  -2   1   14.60    0.92
  -8   2  -1   14.09    0.92
   8  -2  -1   11.51    1.57
   8   2   1   12.61    1.60
   8  -2  -1   14.82    0.73
  -8   2  -1   15.65    1.24
  -8  -2   1   14.54    0.79
   8   2   1   14.49    0.60
   8  -2  -1   14.79    0.80
   8   2   1   13.82    0.58
  -8   2  -1   14.53    0.66
   8   2   1   14.78    0.66
  -8  -2   1   14.50    0.92
   8  -2  -1   15.55    0.88
   9  -2   1   28.91    1.11
   9  -2   1   26.62    1.14
  -9  -2  -1   28.20    1.00
   9   2  -1   29.55    1.14
  -9   2   1   28.86    1.23
  -9  -2  -1   28.30    1.28
   9   2  -1   25.49    1.18
  -9  -2  -1   26.43    0.96
   9   2  -1   28.38    1.10
   9   2  -1   27.37    1.38
   9  -2   1   27.87    1.00
   9   2  -1   25.12    2.13
   9  -2   1   28.97    1.03
  -9  -2  -1   28.31    1.66
  -9   2   1   28.16    1.18
  -9   2   1   28.18    1.35
  -9   2   1   27.32    1.19
  -9   2   1   28.39    1.20
   9  -2   1   27.76    1.06
   9   2  -1   27.26    1.25
  -9   2   1   26.60    1.29
  -9  -2  -1   28.05    1.00
  -9  -2  -1   27.64    1.29
   9  -2   1   25.29    2.07
  -9   2   1   28.98    1.71
  -9   2  -1   26.02    1.30
   9   2   1   27.78    1.28
   9   2   1   26.39    0.97
  -9  -2   1   26.37    1.16
  -9  -2   1   27.20    1.67
  -9  -2   1   28.17    1.31
   9   2   1   27.96    1.19
  -9   2  -1   27.27    1.03
  -9  -2   1   27.75    1.16
  -9  -2   1   27.41    1.20
   9   2   1   25.26    2.10
   9  -2  -1   26.98    1.10
   9  -2  -1   26.23    1.23
  -9   2  -1   26.63    1.31
  -9   2  -1   25.88    1.08
   9  -2  -1   28.81    1.20
   9  -2  -1   27.04    1.25
  -9  -2   1   27.47    1.30
   9  -2  -1   24.64    2.10
   9   2   1   27.10    1.03
   9   2   1   26.90    0.96
 -10  -2  -1   13.83    0.60
  10   2  -1   17.90    2.05
  10   2  -1   14.82    0.77
  10  -2   1   16.12    1.99
  10   2  -1   15.73    0.98
 -10   2   1   14.81    1.06
  10  -2   1   14.14    0.66
 -10  -2  -1   14.64    1.07
  10  -2   1   13.93    0.84
 -10  -2  -1   16.07    1.06
  10   2  -1   15.53    1.12
 -10   2   1   14.59    1.50
 -10  -2  -1   15.72    1.50
 -10   2   1   15.93    1.14
 -10  -2  -1   14.40    0.68
 -10   2   1   14.92    0.92
 -10   2   1   14.58    0.89
  10  -2   1   14.80    0.77
  10  -2  -1   13.31    0.78
  10   2   1   15.69    2.00
 -10   2  -1   13.82    0.73
 -10  -2   1   12.87    1.48
  10   2   1   14.87    1.02
  10  -2  -1   17.14    2.04
  10  -2  -1   13.80    0.98
 -10   2  -1   14.74    1.07
 -10  -2   1   14.78    0.93
  10  -2  -1   15.10    0.98
 -10  -2   1   15.24    1.08
  10   2   1   13.42    0.61
 -10   2  -1   15.24    1.07
 -10  -2   1   14.57    1.05
  10   2   1   13.41    0.77
 -10  -2   1   13.97    0.84
  11  -2   1   30.05    1.36
 -11   2   1   31.10    1.55
  11  -2   1   33.47    2.60
 -11  -2  -1   32.82    2.04
  11   2  -1   30.37    1.57
 -11   2   1   30.51    1.59
 -11  -2  -1   31.65    1.16
  11  -2   1   31.70    1.24
 -11  -2  -1   31.57    1.54
  11   2  -1   31.66    2.63
  11   2  -1   30.56    1.62
  11   2   1   32.33    1.19
 -11   2  -1   31.13    1.56
  11   2   1   33.75    2.60
 -11   2  -1   32.05    1.56
 -11  -2   1   32.95    1.62
 -11  -2   1   31.84    1.55
  11   2   1   30.56    1.52
  11  -2  -1   32.15    1.48
  11  -2  -1   34.58    2.67
 -11  -2   1   31.71    1.41
 -11   2  -1   30.30    1.20
 -11  -2   1   32.74    2.05
 -12   2   1   28.32    1.67
  12   2  -1   26.36    1.42
 -12  -2  -1   28.11    1.11
 -12  -2  -1   29.27    1.57
 -12   2   1   27.96    1.39
 -12   2   1   29.51    1.57
  12   2  -1   33.90    2.90
 -12  -2  -1   29.62    2.15
 -12  -2  -1   27.98    1.58
  12   2  -1   28.86    1.63
  12  -2   1   33.02    2.82
  12  -2   1   27.46    1.19
 -12   2  -1   29.01    1.17
  12  -2  -1   27.94    1.52
 -12  -2   1   29.70    1.38
 -12   2  -1   29.70    1.58
  12  -2  -1   27.93    1.44
 -12  -2   1   30.29    2.16
  12   2   1   28.67    1.53
  12   2   1   27.96    1.13
 -12   2  -1   32.27    1.64
  12   2   1   34.26    2.85
 -12  -2   1   28.84    1.61
 -12  -2   1   28.74    1.61
  12  -2  -1   34.03    2.95
 -13   2   1    5.72    0.93
 -13  -2  -1    6.44    0.94
 -13   2   1    5.82    0.99
 -13  -2  -1    5.49    0.90
 -13   2   1    5.34    0.72
  13  -2   1    6.37    0.67
  13   2  -1    4.23    0.78
  13  -2   1    7.10    1.93
  13   2  -1    5.93    1.04
  13  -2  -1   10.83    2.79
 -13   2  -1    6.00    0.96
  13   2   1    8.60    1.10
 -13  -2   1    6.35    0.99
 -13  -2   1    5.18    0.89
 -13  -2   1    3.35    1.03
 -13  -2   1    4.73    0.91
 -13   2  -1    4.30    0.94
  13  -2  -1    5.60    0.78
  13   2   1    5.72    1.85
 -14   2   1    4.50    0.95
 -14   2   1    1.65    0.96
  14   2  -1    1.01    0.73
  14  -2   1    6.11    1.83
 -14   2   1    2.70    0.72
 -14  -2  -1    1.93    1.01
 -14  -2  -1    2.57    0.82
 -14   2  -1    3.55    0.93
 -14  -2   1    0.33    1.03
 -14  -2   1    2.51    0.72
 -14   2  -1    3.32    0.95
  14  -2  -1    1.95    0.76
 -14  -2   1    2.84    0.84
 -14  -2   1    4.12    1.08
 -15   2   1    5.14    0.76
  15   2  -1    5.02    0.77
 -15  -2   1    3.89    0.76
  15  -2  -1    7.40    1.02
   0   3  -1    0.93    0.19
   0   3   1    0.92    0.18
   0   3   1    1.05    0.19
   0  -3   1    0.95    0.18
   0  -3   1    0.85    0.26
   0   3  -1    1.23    0.29
   0  -3  -1    1.11    0.19
   0   3   1    1.06    0.20
   0  -3  -1    1.03    0.19
   0  -3   1    0.82    0.18
   0   3  -1    0.89    0.21
   0   3  -1    0.77    0.30
   0  -3  -1    0.75    0.19
   0   3  -1    0.87    0.20
   0   3   1    1.00    0.20
   0  -3  -1    0.66    0.20
   0  -3  -1    1.01    0.22
   0  -3   1    1.02    0.21
   0   3  -1    0.66    0.19
   0  -3   1    1.07    0.21
   0  -3   1    0.79    0.19
   0  -3   1    0.75    0.26
   0   3   1    1.23    0.23
  -1  -3  -1  282.73    8.97
  -1  -3  -1  284.69    9.03
  -1   3   1  292.85    9.03
   1   3  -1  284.30    9.03
   1  -3   1  309.71    9.03
   1  -3   1  295.09    8.98
  -1   3   1  286.67    8.99
  -1  -3  -1  287.81    8.98
   1   3  -1  281.92    8.99
  -1   3   1  290.04    8.99
  -1   3   1  284.74    9.10
   1  -3   1  303.02    8.99
  -1  -3  -1  291.06    8.98
   1   3  -1  294.86    9.00
   1   3  -1  296.51    9.11
  -1  -3  -1  296.14    8.97
   1  -3   1  291.41    8.98
  -1  -3  -1  295.22    9.02
  -1   3   1  304.41    9.00
   1  -3   1  281.18    8.99
   1   3  -1  318.11    9.02
  -1  -3  -1  288.24    8.97
   1  -3   1  302.16    8.98
  -1   3  -1  282.69    8.99
  -1   3  -1  285.67    8.98
  -1  -3   1  288.00    9.02
   1   3   1  285.38    9.03
  -1   3  -1  271.61    8.98
   1  -3  -1  279.19    8.99
  -1   3  -1  294.63    8.98
  -1  -3   1  284.58    9.03
   1   3   1  293.37    8.97
  -1   3  -1  291.01    8.99
  -1   3  -1  292.73    9.05
   1  -3  -1  288.11    9.01
   1  -3  -1  289.78    9.01
  -1   3  -1  295.62    9.03
   1   3   1  281.69    8.97
   1   3   1  287.75    8.98
  -1   3  -1  290.62    8.99
  -1  -3   1  308.69    9.06
  -1  -3   1  295.61    8.99
  -1   3  -1  244.35    9.18
   1   3   1  279.61    8.96
   1   3   1  298.45    9.02
  -1  -3   1  282.74    9.00
   1   3   1  290.42    8.98
  -2   3   1  363.47   11.09
  -2   3   1  352.06   11.08
   2  -3   1  357.24   11.09
   2   3  -1  375.39   11.17
  -2   3   1  360.81   11.14
   2  -3   1  362.70   11.10
  -2   3   1  371.50   11.12
   2   3  -1  365.61   11.20
  -2   3   1  349.85   11.26
  -2  -3  -1  354.86   11.10
  -2   3   1  333.59   11.21
  -2  -3  -1  355.42   11.17
  -2  -3  -1  349.22   11.16
   2  -3   1  353.36   11.11
  -2  -3  -1  350.65   11.11
   2  -3   1  345.82   11.29
   2   3  -1  344.46   11.16
   2  -3   1  349.82   11.19
  -2   3   1  362.15   11.12
   2  -3   1  361.45   11.10
   2  -3   1  365.71   11.09
   2   3  -1  349.23   11.12
  -2   3   1  350.90   11.17
   2  -3   1  368.72   11.14
   2  -3   1  352.27   11.09
  -2  -3  -1  359.88   11.08
   2   3  -1  358.11   11.13
   2  -3  -1  361.57   11.12
   2   3   1  360.19   11.07
  -2  -3   1  361.17   11.20
  -2  -3   1  355.92   11.12
  -2  -3   1  356.48   11.13
  -2   3  -1  356.90   11.09
   2   3   1  368.46   11.18
   2   3   1  355.43   11.16
  -2  -3   1  351.98   11.16
  -2   3  -1  352.39   11.10
   2   3   1  360.61   11.11
  -2  -3   1  375.18   11.14
   2  -3  -1  378.16   11.14
   2  -3  -1  360.66   11.18
  -2   3  -1  358.45   11.30
   2   3   1  357.04   11.16
   2  -3  -1  355.83   11.12
  -2   3  -1  371.04   11.14
  -2  -3   1  369.68   11.12
   2  -3  -1  345.02   11.27
   2  -3  -1  352.27   11.12
  -2   3  -1  355.34   11.12
  -2   3  -1  369.16   11.10
   2   3   1  368.45   11.10
  -2  -3   1  364.49   11.17
   2  -3  -1  365.34   11.17
   2  -3  -1  350.55   11.14
  -3  -3  -1  179.53    5.65
   3  -3   1  184.14    5.60
   3   3  -1  187.11    5.71
  -3  -3  -1  177.13    5.53
  -3   3   1  186.35    5.62
   3  -3   1  181.87    5.61
  -3  -3  -1  170.90    5.53
   3  -3   1  176.94    5.55
   3   3  -1  185.33    5.66
   3   3  -1  179.53    5.59
  -3   3   1  172.66    5.60
  -3  -3  -1  173.41    5.58
  -3  -3  -1  180.00    5.53
   3  -3   1  171.53    5.57
   3  -3   1  183.16    5.60
  -3   3   1  186.22    5.71
   3  -3   1  189.36    5.71
  -3   3   1  179.92    5.82
   3  -3   1  171.62    5.84
   3  -3   1  177.77    5.56
   3   3  -1  179.86    5.61
  -3  -3  -1  170.40    5.59
  -3   3   1  182.06    5.62
  -3  -3  -1  174.27    5.53
  -3   3   1  189.85    5.60
   3   3  -1  168.94    5.64
  -3   3   1  181.39    5.53
  -3   3   1  185.76    5.60
   3   3  -1  186.77    5.60
  -3   3   1  174.86    5.57
   3  -3   1  180.99    5.55
   3   3  -1  178.42    5.61
  -3  -3  -1  178.51    5.69
  -3   3  -1  178.14    5.55
  -3  -3   1  185.81    5.61
   3   3   1  175.33    5.53
   3  -3  -1  178.67    5.69
   3  -3  -1  174.03    5.62
   3  -3  -1  178.15    5.60
  -3  -3   1  179.88    5.65
  -3   3  -1  179.24    5.85
   3  -3  -1  183.11    5.60
   3  -3  -1  183.03    5.69
  -3  -3   1  171.31    5.59
   3  -3  -1  165.75    5.80
   3   3   1  174.92    5.53
  -3  -3   1  179.73    5.59
   3   3   1  177.85    5.59
  -3   3  -1  171.31    5.60
   3  -3  -1  183.98    5.62
  -3   3  -1  182.72    5.56
   3   3   1  179.37    5.58
   3   3   1  172.27    5.65
  -3  -3   1  177.68    5.61
   3   3   1  184.76    5.69
  -3   3  -1  174.30    5.55
  -3  -3   1  172.92    5.70
   3   3   1  176.54    5.53
   3   3   1  175.24    5.53
  -3   3  -1  180.28    5.61
   3   3   1  180.09    5.64
  -3   3  -1  176.81    5.57
   3  -3  -1  180.65    5.60
  -3   3  -1  173.24    5.61
   3  -3  -1  176.76    5.52
  -3  -3   1  171.36    5.65
  -4  -3  -1   81.01    2.66
   4  -3   1   79.42    2.63
   4   3  -1   83.14    2.82
  -4  -3  -1   80.98    2.59
   4  -3   1   84.05    2.61
   4  -3   1   84.85    2.69
  -4   3   1   83.30    3.00
  -4   3   1   77.49    2.65
  -4  -3  -1   81.66    2.73
   4  -3   1   82.97    2.62
  -4   3   1   80.15    2.70
   4  -3   1   79.29    2.62
  -4  -3  -1   80.88    2.58
  -4   3   1   81.49    2.67
   4  -3   1   84.46    2.66
  -4   3   1   83.72    2.70
  -4   3   1   80.41    2.67
  -4   3   1   75.57    2.80
   4  -3   1   82.69    2.69
   4   3  -1   86.03    2.67
  -4  -3  -1   82.85    2.59
   4   3  -1   80.30    2.75
   4   3  -1   77.72    2.69
  -4  -3  -1   74.62    2.81
   4   3  -1   80.87    2.68
   4  -3   1   70.02    3.18
   4  -3   1   83.87    2.82
   4   3  -1   77.96    2.66
  -4   3   1   80.11    2.68
   4  -3   1   82.99    2.61
  -4  -3  -1   82.22    2.58
  -4  -3   1   87.77    2.76
  -4   3  -1   87.01    2.63
   4  -3  -1   82.04    2.67
  -4   3  -1   86.65    2.61
   4   3   1   88.45    2.82
   4   3   1   85.14    2.59
   4  -3  -1   72.27    2.79
  -4   3  -1   87.82    3.05
   4   3   1   82.27    2.74
  -4   3  -1   81.63    2.71
  -4   3  -1   82.75    2.67
   4  -3  -1   86.23    2.68
   4  -3  -1   77.70    2.96
   4  -3  -1   87.75    2.68
  -4   3  -1   83.40    2.69
   4   3   1   82.82    2.71
  -4   3  -1   84.50    2.63
   4   3   1   85.99    2.66
   4   3   1   84.84    2.58
  -4  -3   1   84.76    2.70
   4  -3  -1   84.30    2.80
   4  -3  -1   81.56    2.70
   4   3   1   84.51    2.59
   4   3   1   84.56    2.58
  -4  -3   1   85.47    2.66
  -4  -3   1   85.16    2.68
   4  -3  -1   85.53    2.70
  -4   3  -1   83.30    2.61
  -4  -3   1   88.40    2.69
   5  -3   1   19.04    0.81
   5  -3   1   20.37    0.82
   5  -3   1   21.01    0.78
  -5  -3  -1   21.18    0.90
  -5   3   1   19.86    0.82
  -5  -3  -1   19.44    0.85
  -5   3   1   19.49    0.83
   5  -3   1   20.92    0.84
   5  -3   1   20.62    0.73
   5  -3   1   21.24    0.72
   5   3  -1   20.21    0.85
  -5  -3  -1   20.34    0.69
   5  -3   1   19.37    1.00
  -5  -3  -1   20.40    0.67
   5  -3   1   20.74    0.74
  -5  -3  -1   20.46    0.68
  -5  -3  -1   19.12    0.82
   5   3  -1   20.11    0.82
  -5   3   1   20.20    0.84
   5   3  -1   19.11    0.79
  -5   3   1   19.29    1.25
  -5   3   1   19.80    1.05
   5  -3   1   17.80    1.25
   5   3  -1   21.13    1.04
  -5  -3  -1   19.27    1.04
   5   3  -1   19.49    0.80
   5  -3   1   20.78    0.71
  -5   3   1   20.73    0.84
  -5   3   1   20.60    0.83
  -5  -3  -1   20.42    0.69
   5   3  -1   18.33    0.91
  -5   3   1   20.32    0.81
  -5  -3   1   18.70    0.82
  -5   3  -1   19.73    0.71
  -5  -3   1   17.94    1.02
  -5   3  -1   19.78    0.75
  -5   3  -1   18.63    0.78
   5   3   1   19.42    0.69
   5  -3  -1   18.55    0.80
   5   3   1   19.83    1.01
   5  -3  -1   18.08    0.81
  -5  -3   1   18.60    0.82
   5  -3  -1   18.56    0.99
   5  -3  -1   18.90    0.82
  -5   3  -1   18.30    1.27
  -5  -3   1   19.98    0.93
  -5   3  -1   19.07    0.85
  -5   3  -1   18.39    0.79
   5   3   1   19.24    0.67
  -5   3  -1   18.21    0.84
   5  -3  -1   19.99    0.82
  -5  -3   1   19.60    0.79
   5   3   1   18.22    0.90
   5   3   1   19.33    0.67
   5   3   1   19.88    0.80
   5  -3  -1   16.31    1.22
  -5   3  -1   19.06    0.72
  -5  -3   1   20.37    0.82
   5   3   1   18.09    0.83
   5   3   1   19.55    0.68
   5  -3  -1   19.63    0.86
   6  -3   1  169.27    4.99
  -6   3   1  159.68    5.48
   6   3  -1  157.63    5.02
   6   3  -1  157.23    4.98
  -6   3   1  155.18    5.02
   6   3  -1  162.74    5.02
   6  -3   1  164.11    4.99
   6   3  -1  154.95    5.52
  -6   3   1  161.29    5.00
  -6   3   1  158.64    5.23
  -6  -3  -1  151.79    5.04
   6  -3   1  163.33    4.93
  -6   3   1  167.34    5.02
   6  -3   1  153.48    5.49
   6   3  -1  159.92    5.00
   6   3  -1  159.39    5.13
  -6  -3  -1  161.17    5.09
   6  -3   1  158.44    4.96
  -6   3   1  158.07    5.03
  -6  -3  -1  157.40    4.90
  -6  -3  -1  158.78    4.91
   6  -3   1  160.45    4.95
  -6   3   1  156.08    5.00
   6   3  -1  149.47    5.08
  -6  -3  -1  157.18    5.23
  -6  -3  -1  163.77    4.91
   6   3  -1  164.04    5.42
  -6  -3  -1  157.09    5.01
   6  -3   1  156.26    4.95
   6   3   1  160.12    5.01
   6  -3  -1  154.37    5.03
  -6   3  -1  154.44    5.04
   6   3   1  156.65    4.89
   6   3   1  136.16    4.99
  -6   3  -1  161.30    4.95
  -6  -3   1  163.13    4.99
   6  -3  -1  149.91    5.18
  -6   3  -1  155.42    4.93
  -6  -3   1  160.92    5.02
  -6   3  -1  153.38    5.04
   6  -3  -1  159.41    4.99
   6   3   1  159.64    5.05
  -6  -3   1  161.36    5.11
  -6   3  -1  159.71    4.93
  -6  -3   1  155.25    5.02
  -6  -3   1  145.66    5.13
   6   3   1  155.37    5.08
   6  -3  -1  149.26    5.46
   6  -3  -1  154.57    5.00
   6   3   1  157.31    4.91
   6   3   1  139.67    5.06
   6  -3  -1  161.84    5.03
   6   3   1  161.61    5.24
  -6   3  -1  154.18    4.94
  -6  -3   1  155.63    5.00
  -6   3  -1  156.78    4.98
  -6  -3   1  156.09    5.24
   6   3   1  159.06    4.90
   6   3   1  154.10    5.54
  -7  -3  -1    7.08    0.40
  -7  -3  -1    7.60    0.94
   7  -3   1    7.46    0.50
   7   3  -1    7.75    0.52
  -7   3   1    6.99    0.96
   7   3  -1    6.41    0.57
   7   3  -1    6.48    1.27
  -7  -3  -1    7.81    0.69
   7  -3   1    7.39    0.44
  -7  -3  -1    7.63    0.39
   7  -3   1    7.99    0.44
  -7  -3  -1    7.28    0.64
  -7   3   1    8.25    0.63
   7  -3   1    7.57    0.43
  -7  -3  -1    7.69    0.41
  -7   3   1    8.49    0.62
   7  -3   1    7.45    0.40
   7  -3   1    7.73    0.49
   7   3  -1    7.52    0.66
  -7   3   1    7.67    0.72
  -7   3   1    6.59    0.65
  -7   3   1    7.27    0.59
   7  -3   1    5.25    1.18
  -7  -3  -1    7.31    0.36
   7   3  -1    6.98    0.73
  -7  -3  -1    7.15    0.63
  -7   3   1    6.36    0.57
  -7   3  -1    7.04    0.43
   7  -3  -1    6.97    0.52
   7  -3  -1    6.80    0.56
   7   3   1    6.24    0.44
   7  -3  -1    5.46    0.65
  -7   3  -1    7.28    0.46
   7   3   1    7.06    0.36
  -7  -3   1    6.00    0.66
   7   3   1    6.07    1.23
   7  -3  -1    5.99    1.23
  -7   3  -1    7.43    0.51
   7   3   1    9.15    0.71
   7  -3  -1    5.95    0.78
  -7   3  -1    6.43    0.43
  -7  -3   1    6.86    0.93
   7   3   1    6.98    0.60
  -7  -3   1    5.87    0.54
  -7  -3   1    6.86    0.68
  -7   3  -1    6.59    0.67
   7   3   1    6.70    0.36
   7   3   1    6.90    0.71
  -7   3  -1    6.46    0.67
  -7   3  -1    7.04    0.48
   7   3   1    7.04    0.36
  -7  -3   1    6.09    0.55
  -7  -3   1    6.13    0.60
   8  -3   1  140.14    4.45
  -8  -3  -1  140.94    4.42
  -8   3   1  138.20    4.57
  -8   3   1  139.00    4.55
   8   3  -1  143.94    4.57
  -8  -3  -1  136.95    4.41
   8  -3   1  139.69    4.51
  -8  -3  -1  136.88    4.88
   8   3  -1  144.77    4.52
  -8   3   1  141.77    4.64
   8   3  -1  133.58    5.26
  -8  -3  -1  135.14    4.62
   8   3  -1  137.60    4.57
  -8  -3  -1  139.11    4.59
   8  -3   1  130.21    5.22
   8  -3   1  144.06    4.50
  -8   3   1  142.09    4.57
   8  -3   1  142.57    4.48
   8   3  -1  145.33    4.56
   8   3  -1  136.19    4.67
  -8   3   1  145.71    4.55
  -8  -3  -1  142.46    4.44
  -8   3   1  140.37    4.63
   8  -3   1  143.94    4.48
  -8   3   1  137.08    4.89
  -8  -3  -1  138.41    4.43
   8   3   1  143.76    4.44
   8   3   1  138.18    4.43
  -8   3  -1  140.92    4.46
  -8  -3   1  146.84    4.57
  -8  -3   1  148.66    4.61
   8   3   1  143.18    4.60
  -8  -3   1  148.01    4.53
  -8  -3   1  141.94    4.55
  -8   3  -1  139.93    4.53
   8  -3  -1  134.33    5.22
   8   3   1  138.01    5.30
  -8   3  -1  143.72    4.48
  -8   3  -1  141.10    4.63
   8  -3  -1  138.19    4.56
   8  -3  -1  144.10    4.58
  -8  -3   1  143.66    4.64
  -8  -3   1  144.29    4.92
   8   3   1  141.42    4.66
   8  -3  -1  139.49    4.59
   8  -3  -1  141.86    4.53
  -8   3  -1  140.81    4.63
   8   3   1  145.05    4.42
   8   3   1  140.41    4.41
  -9   3   1   20.00    0.99
   9  -3   1   19.38    0.85
  -9   3   1   19.55    1.03
  -9  -3  -1   19.21    0.73
   9  -3   1   17.88    1.85
  -9  -3  -1   19.77    1.06
   9  -3   1   19.67    0.81
  -9  -3  -1   19.34    0.77
  -9   3   1   19.09    1.15
   9  -3   1   19.97    0.92
  -9  -3  -1   19.04    1.11
   9   3  -1   19.88    0.88
  -9  -3  -1   18.79    1.45
   9   3  -1   20.03    0.94
   9   3  -1   20.27    1.04
   9   3  -1   19.76    1.18
  -9   3   1   19.83    0.99
  -9   3   1   19.11    0.97
  -9  -3  -1   19.03    0.77
   9  -3   1   18.36    0.87
   9   3  -1   19.47    1.97
   9  -3   1   19.33    0.77
  -9   3   1   19.06    1.08
  -9   3  -1   18.76    1.09
   9   3   1   19.44    0.74
   9   3   1   19.08    0.73
  -9  -3   1   19.65    0.94
   9  -3  -1   18.33    1.91
   9  -3  -1   19.08    0.88
   9   3   1   18.73    1.93
   9  -3  -1   18.44    1.04
  -9  -3   1   18.68    1.46
  -9  -3   1   18.68    0.98
   9  -3  -1   18.91    0.97
  -9  -3   1   18.93    0.95
  -9  -3   1   19.73    1.10
  -9   3  -1   21.14    1.13
   9  -3  -1   19.36    1.01
  -9  -3   1   19.43    1.10
  -9   3  -1   20.45    0.84
   9   3   1   19.50    1.36
 -10  -3  -1  130.68    4.75
  10  -3   1  129.35    4.23
  10   3  -1  124.93    4.41
  10  -3   1  130.88    4.17
 -10  -3  -1  131.14    4.10
 -10  -3  -1  128.55    4.33
  10  -3   1  126.87    5.23
  10   3  -1  128.12    4.29
 -10   3   1  129.00    4.26
 -10  -3  -1  123.83    4.09
 -10  -3  -1  125.45    4.38
 -10   3   1  131.24    4.39
 -10   3   1  131.71    4.37
  10   3  -1  129.74    5.29
  10  -3   1  126.04    4.21
  10   3  -1  130.58    4.21
 -10   3  -1  129.19    4.38
 -10  -3   1  132.23    4.35
 -10   3  -1  130.48    4.38
 -10   3  -1  129.84    4.14
  10   3   1  127.75    4.10
 -10  -3   1  130.54    4.39
  10   3   1  129.57    5.29
  10  -3  -1  128.49    5.24
  10   3   1  125.57    4.38
 -10  -3   1  136.50    4.28
 -10  -3   1  134.27    4.26
  10  -3  -1  130.42    4.31
  10   3   1  131.51    4.16
 -10  -3   1  135.25    4.77
  10  -3  -1  129.21    4.29
 -11  -3  -1    2.54    0.64
 -11   3   1    1.39    0.71
 -11  -3  -1    2.21    0.76
  11   3  -1    2.81    1.36
  11  -3   1    2.03    0.42
  11   3  -1    2.61    0.76
  11  -3   1    2.77    1.33
 -11   3   1    0.77    0.64
  11  -3   1    2.40    0.53
 -11  -3  -1    2.36    0.73
 -11   3   1    1.43    0.61
 -11  -3  -1    1.65    0.33
  11   3  -1    0.69    1.06
 -11  -3   1    1.85    0.62
 -11   3  -1    1.64    0.69
  11   3   1    2.23    0.69
 -11   3  -1    2.22    0.39
 -11   3  -1    2.61    0.69
  11   3   1    1.56    0.35
  11  -3  -1    2.48    1.35
  11  -3  -1    1.05    0.67
 -11  -3   1    1.29    0.68
  11  -3  -1    1.24    0.58
  11   3   1    3.13    1.35
  11  -3  -1    2.44    0.68
 -11  -3   1    1.72    0.74
 -11  -3   1    3.02    0.67
  12   3  -1   54.84    2.32
 -12   3   1   55.60    2.07
 -12  -3  -1   56.03    2.80
  12  -3   1   55.98    3.55
 -12   3   1   51.47    2.30
 -12  -3  -1   55.65    2.23
  12  -3   1   52.24    1.90
  12   3  -1   54.78    2.10
  12   3  -1   57.51    3.52
 -12  -3  -1   53.44    1.80
 -12  -3  -1   52.87    2.26
 -12   3   1   53.92    2.21
 -12  -3   1   53.55    2.79
  12   3   1   52.34    1.81
 -12   3  -1   53.02    2.27
  12  -3  -1   49.88    2.10
  12  -3  -1   55.83    3.56
  12  -3  -1   53.52    2.17
 -12   3  -1   53.62    1.88
  12   3   1   52.51    3.39
 -12   3  -1   51.85    2.26
 -12  -3   1   51.60    2.26
 -12  -3   1   52.94    2.22
 -12  -3   1   53.23    2.04
  12   3   1   51.84    2.21
  13   3  -1   28.20    3.14
 -13  -3  -1   20.30    2.15
 -13  -3  -1   21.04    1.56
 -13   3   1   20.63    1.63
  13   3  -1   23.90    1.63
 -13   3   1   19.10    1.30
 -13   3   1   25.26    1.59
 -13  -3  -1   21.95    1.54
  13   3  -1   20.48    1.35
  13  -3   1   25.32    2.90
 -13   3  -1   21.39    1.57
 -13  -3   1   20.95    1.30
  13  -3  -1   18.67    1.34
 -13   3  -1   21.17    1.58
  13   3   1   24.17    2.90
  13  -3  -1   27.38    3.20
 -13  -3   1   21.41    2.16
 -13  -3   1   22.90    1.58
 -13  -3   1   20.67    1.53
  13   3   1   23.73    1.49
  14  -3   1   69.14    4.18
  14   3  -1   70.15    4.28
 -14  -3  -1   59.69    2.63
 -14   3   1   60.83    2.66
 -14   3   1   56.88    2.34
 -14  -3  -1   56.76    3.20
 -14  -3  -1   60.04    2.63
  14   3  -1   57.76    2.36
  14   3  -1   59.09    3.33
 -14   3   1   56.60    2.64
 -14  -3   1   60.60    2.35
 -14  -3   1   58.19    2.57
  14   3   1   62.53    3.93
 -14  -3   1   54.35    3.16
 -14   3  -1   58.31    2.61
  14  -3  -1   67.58    4.20
  14  -3  -1   56.68    2.38
 -14  -3   1   58.09    2.64
 -14   3  -1   59.24    2.62
 -15   3   1    7.57    0.91
  15   3  -1    4.73    0.78
 -15  -3   1    7.27    1.00
   0  -4   1   68.72    2.14
   0  -4   1   60.43    2.03
   0   4  -1   67.30    2.14
   0  -4  -1   58.64    1.95
   0   4   1   61.69    2.06
   0  -4  -1   65.85    2.08
   0   4   1   64.05    2.03
   0   4   1   61.39    2.02
   0   4  -1   62.21    2.02
   0   4   1   60.44    2.02
   0   4   1   63.56    2.04
   0  -4   1   62.14    2.00
   0   4  -1   66.85    2.10
   0  -4   1   58.96    2.04
   0  -4  -1   65.02    2.03
   0  -4   1   63.58    2.03
   0   4  -1   61.04    2.05
   0  -4  -1   62.85    2.02
   0   4   1   68.30    2.10
   0  -4  -1   63.03    2.04
   0  -4  -1   65.91    2.03
   0  -4   1   60.92    2.08
   0   4   1   60.78    2.03
   0   4  -1   63.21    2.08
   0  -4  -1   60.51    2.06
   0  -4  -1   62.20    2.04
   1   4  -1  779.89   24.13
  -1   4  -1  803.17   24.30
   1  -4  -1  760.78   24.13
   2   4  -1  889.42   28.30
  -2  -4   1  936.17   28.30
   2  -4  -1  937.74   28.33
  -2   4  -1  903.01   28.50
   3  -4   1  477.23   15.60
   3  -4   1  503.35   15.31
  -3  -4  -1  476.16   15.34
  -3   4   1  491.59   15.34
  -3  -4  -1  497.68   15.40
  -3   4   1  481.58   15.31
  -3   4   1  499.41   15.58
  -3  -4  -1  494.22   15.44
  -3   4   1  493.04   15.34
   3   4  -1  491.59   15.34
   3  -4   1  496.94   15.32
  -3   4   1  513.65   15.37
  -3   4   1  488.48   15.27
  -3   4   1  492.91   15.43
   3  -4   1  499.62   15.34
   3  -4   1  496.24   15.35
  -3  -4  -1  483.05   15.32
   3  -4   1  498.46   15.34
   3  -4   1  474.38   15.28
   3   4  -1  502.55   15.36
   3  -4   1  475.45   15.32
   3  -4   1  501.71   15.31
   3   4  -1  520.54   15.34
   3   4  -1  482.87   15.35
  -3   4   1  484.86   15.36
  -3  -4  -1  496.66   15.29
   3   4  -1  470.20   15.40
  -3   4   1  480.15   15.34
   3   4  -1  500.96   15.39
   3   4  -1  508.62   15.46
  -3   4  -1  491.43   15.35
   3  -4  -1  496.87   15.36
  -3   4  -1  491.96   15.35
  -3  -4   1  494.71   15.33
   3  -4  -1  487.51   15.33
  -3  -4   1  494.98   15.39
   3   4   1  486.56   15.40
   3  -4  -1  512.62   15.35
   3  -4  -1  476.31   15.57
   3  -4  -1  491.95   15.43
  -3   4  -1  483.18   15.35
   3   4   1  503.40   15.39
  -3   4  -1  510.55   15.33
   3  -4  -1  497.67   15.34
  -3  -4   1  504.76   15.40
   3   4   1  489.67   15.28
  -3   4  -1  500.75   15.31
  -3   4  -1  507.97   15.32
   3  -4  -1  513.33   15.44
  -3  -4   1  488.10   15.46
   3   4   1  505.52   15.32
  -3   4  -1  485.46   15.31
   3  -4  -1  493.68   15.36
  -3  -4   1  523.82   15.36
  -3  -4   1  475.29   15.34
  -3   4  -1  511.51   15.62
   3   4   1  521.26   15.45
  -3  -4   1  494.24   15.36
   4  -4   1  119.39    3.89
  -4   4   1  121.00    4.21
   4  -4   1  123.06    3.86
  -4   4   1  119.97    3.90
   4  -4   1  123.22    3.83
   4  -4   1  110.41    4.19
  -4  -4  -1  119.21    3.94
  -4   4   1  120.47    3.86
   4  -4   1  122.78    4.03
   4  -4   1  116.54    3.84
  -4  -4  -1  120.28    4.37
  -4   4   1  113.75    3.87
   4  -4   1  117.36    3.80
  -4  -4  -1  117.34    3.80
  -4  -4  -1  116.51    3.84
   4   4  -1  120.98    3.95
  -4   4   1  117.85    3.90
   4  -4   1  119.55    3.84
  -4  -4  -1  119.36    3.79
  -4   4   1  115.03    3.85
   4  -4   1  120.84    3.89
  -4  -4  -1  122.44    3.81
  -4  -4  -1  115.48    3.85
   4   4  -1  111.28    3.94
   4   4  -1  118.81    3.86
   4  -4   1  116.79    3.82
   4   4  -1  119.39    4.03
  -4   4   1  116.62    3.87
   4   4  -1  115.59    3.89
  -4   4  -1  123.02    3.85
  -4   4  -1  120.32    3.90
  -4   4  -1  128.26    4.26
  -4   4  -1  125.02    3.87
  -4  -4   1  129.56    3.90
   4  -4  -1  124.54    3.90
   4  -4  -1  119.09    3.90
   4  -4  -1  123.67    3.86
   4   4   1  123.02    3.80
   4   4   1  127.68    4.02
   4   4   1  123.77    3.80
   4  -4  -1  124.15    4.01
  -4  -4   1  121.41    4.04
  -4  -4   1  124.79    3.90
  -4  -4   1  131.57    3.97
   4   4   1  124.31    3.81
   4   4   1  113.17    4.04
   4   4   1  125.18    3.86
   4   4   1  126.15    3.94
   4  -4  -1  137.19    4.04
  -4  -4   1  128.85    3.96
  -4   4  -1  121.14    3.90
  -4  -4   1  128.16    3.87
   4  -4  -1  124.26    3.88
  -4   4  -1  123.69    3.83
  -4  -4   1  121.00    3.88
   4   4   1  122.53    3.81
   4  -4  -1  129.79    3.88
  -4   4  -1  127.33    3.85
  -4   4  -1  125.10    3.83
   5  -4   1  175.14    5.51
  -5   4   1  167.63    5.49
   5  -4   1  173.33    5.45
  -5  -4  -1  177.81    5.41
  -5   4   1  175.44    5.52
  -5  -4  -1  172.41    5.40
   5  -4   1  163.11    5.89
   5  -4   1  181.43    5.44
  -5  -4  -1  178.38    5.58
   5  -4   1  180.02    5.68
   5   4  -1  173.78    5.48
   5   4  -1  175.78    5.51
   5  -4   1  176.76    5.43
  -5  -4  -1  172.21    5.48
  -5   4   1  182.74    5.52
  -5   4   1  183.32    5.49
  -5   4   1  179.06    5.48
   5   4  -1  174.08    5.58
  -5   4   1  172.78    5.50
   5  -4   1  172.33    5.42
  -5  -4  -1  175.73    5.40
  -5   4   1  181.11    5.91
   5   4  -1  166.29    5.57
  -5  -4  -1  173.77    5.41
  -5  -4  -1  169.95    5.51
   5  -4   1  182.84    5.47
   5  -4   1  177.36    5.52
  -5  -4  -1  168.52    5.67
   5  -4   1  177.02    5.45
  -5  -4   1  180.37    5.51
   5  -4  -1  165.96    5.88
   5   4   1  177.38    5.41
   5  -4  -1  168.03    5.47
   5  -4  -1  172.67    5.65
  -5  -4   1  170.46    5.49
   5  -4  -1  149.29    5.62
   5  -4  -1  177.95    5.52
   5  -4  -1  166.54    5.51
   5   4   1  172.66    5.54
  -5  -4   1  180.99    5.59
  -5   4  -1  175.90    5.47
   5   4   1  177.27    5.48
   5   4   1  177.39    5.67
   5   4   1  173.97    5.40
  -5   4  -1  168.22    5.52
  -5  -4   1  175.37    5.48
  -5   4  -1  166.51    5.51
  -5   4  -1  173.06    5.43
  -5   4  -1  183.09    5.46
   5   4   1  178.57    5.40
   5   4   1  174.79    5.41
  -5  -4   1  156.63    5.58
   5  -4  -1  173.30    5.48
  -5   4  -1  169.33    5.45
   5   4   1  168.77    5.57
  -5   4  -1  171.73    5.44
  -5   4  -1  180.28    5.95
  -5  -4   1  171.54    5.51
  -5  -4   1  170.01    5.68
   5  -4  -1  169.55    5.48
  -6   4   1  200.95    6.07
  -6  -4  -1  184.50    6.11
  -6  -4  -1  194.84    5.99
  -6  -4  -1  188.73    5.97
  -6   4   1  187.90    6.10
  -6  -4  -1  183.93    6.29
  -6  -4  -1  189.74    6.07
   6  -4   1  199.71    6.01
   6  -4   1  187.87    6.01
  -6   4   1  193.64    6.08
  -6   4   1  195.07    6.07
   6  -4   1  178.81    6.54
   6  -4   1  199.85    6.04
  -6  -4  -1  190.55    5.98
   6   4  -1  187.09    6.09
  -6   4   1  205.93    6.76
  -6  -4  -1  190.62    5.99
   6   4  -1  204.33    6.20
   6   4  -1  189.92    6.06
   6  -4   1  181.43    6.00
   6  -4   1  191.71    6.03
   6   4  -1  176.60    6.16
   6  -4   1  187.74    6.03
  -6   4   1  186.69    6.08
  -6  -4  -1  189.40    6.17
  -6   4  -1  195.05    6.04
   6   4   1  193.38    5.99
   6  -4  -1  181.35    6.53
  -6   4  -1  186.77    6.11
  -6  -4   1  196.10    6.06
   6  -4  -1  192.07    6.06
   6   4   1  192.53    5.97
  -6  -4   1  193.90    6.09
   6   4   1  190.99    6.13
  -6  -4   1  195.94    6.19
  -6   4  -1  191.45    6.01
   6  -4  -1  187.39    6.06
  -6   4  -1  193.46    6.01
  -6   4  -1  192.64    6.03
  -6  -4   1  204.67    6.23
   6  -4  -1  200.58    6.11
   6   4   1  196.37    6.07
  -6  -4   1  196.65    6.08
   6   4   1  188.06    6.17
  -6  -4   1  190.95    6.30
   6   4   1  194.57    5.97
  -6   4  -1  201.78    6.04
  -6   4  -1  185.06    6.11
   6  -4  -1  200.87    6.43
   6  -4  -1  188.69    6.10
  -6  -4   1  188.37    6.07
   6   4   1  198.06    5.99
   7  -4   1   83.05    2.61
  -7   4   1   81.42    2.69
  -7  -4  -1   81.26    2.70
  -7  -4  -1   82.66    2.99
   7  -4   1   84.27    2.63
   7   4  -1   76.14    2.81
  -7  -4  -1   82.90    2.57
  -7   4   1   84.88    2.69
  -7  -4  -1   79.42    2.75
   7   4  -1   79.95    3.37
   7  -4   1   89.30    2.67
   7   4  -1   81.51    2.66
  -7  -4  -1   82.10    2.56
   7  -4   1   79.29    2.59
   7  -4   1   74.68    3.28
   7  -4   1   80.75    2.63
  -7   4   1   82.06    2.72
  -7   4   1   84.26    2.69
   7  -4   1   83.77    2.62
  -7   4   1   81.39    2.76
   7   4  -1   80.68    2.72
  -7   4   1   80.95    2.72
  -7  -4  -1   82.30    2.58
  -7  -4  -1   84.57    2.58
   7   4   1   80.47    2.56
  -7   4  -1   78.10    2.62
  -7  -4   1   80.32    2.66
   7   4   1   79.52    2.55
  -7  -4   1   80.89    2.71
   7  -4  -1   77.25    2.66
   7   4   1   81.01    2.58
   7  -4  -1   81.75    2.71
  -7   4  -1   79.10    2.60
  -7   4  -1   77.07    2.74
   7   4   1   78.06    2.74
   7  -4  -1   75.74    2.71
   7   4   1   89.69    2.83
  -7   4  -1   78.81    2.62
  -7   4  -1   78.52    2.75
   7  -4  -1   79.77    2.67
  -7  -4   1   79.15    2.69
  -7  -4   1   76.76    2.98
   7   4   1   75.19    3.34
   7   4   1   80.39    2.57
   7   4   1   77.13    2.80
  -7   4  -1   81.22    2.60
  -7   4  -1   88.05    2.71
   7  -4  -1   73.10    3.26
  -7  -4   1   78.51    2.75
  -7  -4   1   75.94    2.68
  -8   4   1   18.83    0.93
  -8   4   1   18.99    0.92
  -8   4   1   17.89    0.94
   8   4  -1   17.28    1.75
   8  -4   1   19.34    0.85
  -8  -4  -1   18.63    0.73
  -8  -4  -1   17.59    1.32
  -8  -4  -1   19.14    0.73
  -8  -4  -1   19.19    0.96
  -8  -4  -1   19.09    1.03
   8  -4   1   19.61    0.79
   8   4  -1   17.89    0.98
   8  -4   1   15.56    1.68
   8   4  -1   17.76    0.83
   8  -4   1   19.97    0.80
  -8   4   1   18.98    1.09
  -8   4   1   20.19    0.92
   8  -4   1   18.45    0.75
  -8  -4  -1   18.13    0.69
   8  -4   1   18.31    0.74
  -8  -4  -1   19.18    0.74
  -8   4   1   18.12    0.99
   8   4  -1   18.70    1.10
  -8   4  -1   17.53    1.02
   8   4   1   17.52    1.74
  -8  -4   1   19.08    0.89
  -8  -4   1   18.83    0.90
  -8   4  -1   18.76    0.77
  -8   4  -1   19.32    0.79
   8   4   1   18.10    0.69
   8   4   1   17.42    1.07
  -8   4  -1   18.47    0.79
  -8  -4   1   19.13    1.02
  -8  -4   1   18.62    1.36
   8  -4  -1   17.94    0.99
   8   4   1   18.71    0.78
   8   4   1   18.19    0.71
  -8  -4   1   17.39    0.92
  -8   4  -1   18.40    1.03
  -8  -4   1   18.81    0.99
   8  -4  -1   19.80    0.93
   8  -4  -1   18.30    0.92
   8  -4  -1   16.16    1.71
   8  -4  -1   18.90    0.85
   8   4   1   18.60    0.70
  -9  -4  -1   79.91    2.53
  -9   4   1   78.93    2.70
  -9  -4  -1   80.06    2.80
   9  -4   1   77.48    2.56
   9  -4   1   76.89    2.60
  -9   4   1   77.26    2.81
   9   4  -1   78.41    3.62
   9   4  -1   77.83    2.72
  -9   4   1   77.83    2.69
   9  -4   1   83.30    2.59
  -9  -4  -1   80.59    2.54
  -9  -4  -1   78.79    2.52
  -9  -4  -1   78.29    3.11
   9   4  -1   79.73    2.63
   9  -4   1   81.68    2.60
   9  -4   1   77.71    2.61
   9   4  -1   78.00    2.70
  -9   4   1   76.92    2.76
   9  -4   1   74.95    3.53
  -9   4   1   79.49    2.69
   9   4  -1   77.82    2.86
  -9  -4  -1   80.71    2.74
  -9  -4   1   76.32    2.67
  -9  -4   1   78.84    2.66
  -9  -4   1   81.39    2.75
   9  -4  -1   81.05    2.72
  -9  -4   1   79.53    2.68
  -9   4  -1   78.69    2.58
  -9  -4   1   76.23    3.12
   9   4   1   76.57    3.61
   9   4   1   79.15    2.53
   9  -4  -1   75.79    3.58
   9  -4  -1   77.50    2.69
  -9   4  -1   76.67    2.79
   9  -4  -1   74.96    2.73
  -9  -4   1   79.13    2.80
  -9   4  -1   76.41    2.79
  -9   4  -1   78.49    2.60
   9   4   1   81.36    2.52
   9   4   1   78.98    2.56
   9   4   1   78.83    2.83
  -9   4  -1   79.88    2.58
  10   4  -1   94.04    4.24
 -10  -4  -1   96.12    2.99
  10   4  -1   92.54    3.34
  10  -4   1   92.83    3.07
 -10   4   1   92.62    3.25
  10   4  -1   93.40    3.19
 -10  -4  -1   94.26    3.30
 -10   4   1   95.74    3.27
 -10  -4  -1   93.22    3.23
  10  -4   1   91.50    3.07
 -10   4   1   92.79    3.31
  10  -4   1   93.20    4.22
  10   4  -1   95.43    3.10
 -10  -4  -1   93.56    3.66
 -10   4   1   91.05    3.16
 -10   4  -1   93.31    3.04
 -10  -4   1   90.36    3.65
 -10   4  -1   94.13    3.30
  10  -4  -1   95.10    3.16
  10  -4  -1   90.47    3.20
  10   4   1   93.71    3.02
 -10  -4   1   92.75    3.29
 -10  -4   1   90.87    3.14
 -10   4  -1   92.89    3.28
 -10  -4   1   94.78    3.15
 -10  -4   1   93.68    3.24
  10   4   1   88.48    3.29
  10   4   1   93.21    4.21
  10  -4  -1   92.75    4.20
  10   4   1   92.56    2.98
  10  -4  -1   93.08    3.16
  11   4  -1   25.89    1.50
  11  -4   1   28.76    2.54
 -11  -4  -1   26.21    1.00
 -11   4   1   27.39    1.50
  11  -4   1   26.22    1.10
 -11   4   1   26.14    1.26
 -11   4   1   24.32    1.51
 -11  -4  -1   27.67    1.40
 -11  -4  -1   25.80    1.43
  11  -4   1   24.89    1.12
  11   4  -1   25.93    2.61
 -11  -4  -1   26.26    1.89
  11   4   1   25.16    2.52
 -11   4  -1   25.28    1.44
 -11   4  -1   25.81    1.09
  11  -4  -1   28.15    2.60
 -11   4  -1   26.44    1.43
 -11  -4   1   24.95    1.41
 -11  -4   1   25.33    1.41
  11   4   1   26.73    1.46
  11  -4  -1   24.70    1.30
  11  -4  -1   25.30    1.32
  11   4   1   24.87    1.03
 -11  -4   1   26.10    1.90
  12   4  -1   10.20    2.46
 -12   4   1    7.63    0.98
 -12  -4  -1    9.71    1.15
 -12   4   1   10.18    1.17
 -12  -4  -1    9.16    0.59
 -12  -4  -1    8.43    0.92
 -12  -4  -1    6.54    1.07
  12  -4   1   11.23    2.37
  12   4  -1    7.36    0.97
  12  -4   1    7.68    0.75
 -12   4   1    8.71    1.01
  12   4  -1   10.40    1.25
 -12   4  -1    8.19    1.14
 -12   4  -1    8.84    1.20
 -12  -4   1    7.79    0.93
 -12  -4   1    9.18    1.15
 -12  -4   1    8.16    1.10
  12   4   1    8.28    0.60
  12   4   1   10.56    2.37
  12  -4  -1   13.20    2.56
 -12   4  -1    7.65    0.74
  12   4   1    8.95    1.15
  12  -4  -1    8.17    0.82
 -12  -4   1    9.21    1.71
 -13  -4  -1   15.11    2.03
  13  -4   1   21.39    2.86
  13  -4   1   17.16    0.95
 -13  -4  -1   14.53    1.43
  13   4  -1   15.10    1.22
  13   4  -1   18.47    1.55
 -13   4   1   15.46    1.56
 -13   4   1   15.19    1.20
 -13  -4  -1   12.68    1.45
  13   4  -1   21.02    2.97
 -13   4   1   15.98    1.47
 -13  -4   1   14.03    1.18
 -13  -4   1   17.10    1.51
 -13   4  -1   15.78    1.47
  13   4   1   18.00    2.79
 -13   4  -1   16.05    0.97
  13  -4  -1   21.57    2.90
 -13  -4   1   15.97    2.05
 -13  -4   1   14.37    1.44
 -13   4  -1   14.99    1.46
  13   4   1   17.64    1.40
  13  -4  -1   15.91    1.26
 -14   4   1    2.94    0.94
 -14   4   1    0.13    0.70
  14   4  -1    1.20    1.01
 -14   4   1    2.02    0.93
  14   4  -1    1.03    0.75
 -14  -4  -1   -0.33    0.93
 -14  -4  -1    1.15    0.97
 -14  -4  -1    1.64    0.85
 -14  -4   1    0.70    0.70
 -14   4  -1    0.08    0.85
 -14  -4   1    1.81    1.01
 -14   4  -1    2.29    0.91
 -14  -4   1    1.14    1.14
 -14  -4   1    2.30    0.83
  15   4  -1   11.34    1.08
   0  -5   1    4.72    0.42
   0   5  -1    4.53    0.38
   0   5   1    5.15    0.38
   0   5  -1    6.77    0.60
   0  -5  -1    5.73    0.39
   0   5  -1    5.37    0.47
   0   5  -1    5.61    0.41
   0  -5  -1    5.92    0.40
   0   5  -1    5.02    0.43
   0  -5  -1    6.74    0.52
   0   5   1    6.03    0.40
   0  -5  -1    5.22    0.40
   0  -5   1    5.31    0.42
   0  -5   1    5.03    0.43
   0   5  -1    5.75    0.32
   0  -5   1    6.67    0.60
   0   5  -1    5.84    0.40
   0   5   1    5.79    0.37
   0  -5   1    5.13    0.46
   0  -5  -1    5.28    0.38
   0  -5   1    5.00    0.38
   0  -5   1    5.36    0.31
   0   5   1    5.35    0.43
   0  -5   1    5.42    0.40
   0   5  -1    5.05    0.45
   1   5  -1  488.35   16.11
  -1   5   1  551.27   16.30
   1   5  -1  539.88   16.18
  -1   5   1  519.73   16.08
  -1  -5  -1  520.66   16.06
   1  -5   1  534.45   16.08
   1   5  -1  509.80   16.11
  -1   5   1  487.58   16.10
   1  -5   1  518.91   16.14
   1   5  -1  516.86   16.08
  -1  -5  -1  537.23   16.08
  -1   5   1  519.44   16.10
   1  -5   1  507.34   16.07
   1  -5   1  522.80   16.18
  -1   5   1  530.29   16.08
   1   5  -1  493.83   16.08
   1  -5   1  518.43   16.06
   1  -5   1  513.94   16.09
  -1  -5  -1  506.68   16.08
  -1  -5  -1  507.71   16.06
  -1  -5   1  513.65   16.17
  -1   5  -1  543.75   16.31
  -1  -5   1  541.76   16.10
  -1   5  -1  515.26   16.09
   1  -5  -1  541.16   16.09
   1   5   1  518.73   16.13
   1   5   1  545.72   16.15
  -1   5  -1  489.73   16.11
  -1  -5   1  508.82   16.11
   1   5   1  509.02   16.13
   1  -5  -1  548.63   16.11
   1  -5  -1  520.97   16.10
   1   5   1  497.73   16.07
  -1  -5   1  507.80   16.11
  -1  -5   1  521.06   16.09
   1   5   1  517.56   16.08
  -1   5  -1  500.02   16.07
  -1  -5   1  541.49   16.08
  -1   5  -1  528.15   16.12
   1   5   1  528.77   16.06
   2  -5   1  323.09   10.50
  -2  -5  -1  336.06   10.40
  -2   5   1  330.55   10.63
  -2  -5  -1  335.25   10.50
   2  -5   1  346.89   10.43
   2   5  -1  351.92   10.45
   2   5  -1  339.17   10.45
  -2  -5  -1  338.32   10.39
   2   5  -1  345.89   10.53
   2   5  -1  332.57   10.42
   2  -5   1  346.57   10.43
   2   5  -1  321.78   10.47
   2   5  -1  352.32   10.43
   2  -5   1  336.98   10.69
  -2  -5  -1  320.93   10.40
   2  -5   1  341.96   10.41
  -2   5   1  328.88   10.42
  -2  -5  -1  320.89   10.38
  -2   5   1  338.31   10.43
  -2   5   1  327.49   10.45
   2  -5   1  316.97   10.37
  -2   5   1  323.18   10.42
   2  -5   1  321.53   10.42
   2  -5   1  341.48   10.41
   2  -5   1  340.06   10.41
  -2   5   1  324.10   10.37
  -2   5   1  329.64   10.40
  -2   5   1  333.96   10.48
  -2  -5  -1  335.61   10.40
  -2   5   1  350.50   10.45
  -2   5  -1  342.72   10.45
   2  -5  -1  340.25   10.45
  -2  -5   1  325.46   10.42
   2  -5  -1  323.42   10.42
   2   5   1  328.95   10.39
   2   5   1  339.85   10.48
  -2   5  -1  323.78   10.40
  -2   5  -1  327.49   10.41
   2   5   1  329.63   10.38
  -2  -5   1  345.47   10.44
   2   5   1  330.56   10.48
  -2  -5   1  333.42   10.45
   2   5   1  345.15   10.40
   2   5   1  340.06   10.39
   2   5   1  325.49   10.40
   2   5   1  347.22   10.51
   2  -5  -1  356.10   10.43
  -2   5  -1  338.67   10.43
  -2   5  -1  329.49   10.38
  -2  -5   1  341.32   10.48
   2  -5  -1  322.01   10.44
   2   5   1  335.37   10.39
  -2   5  -1  334.76   10.40
  -2   5  -1  345.83   10.68
  -2   5  -1  334.62   10.42
  -2  -5   1  334.81   10.53
   2  -5  -1  347.66   10.69
   2  -5  -1  351.71   10.49
  -3   5   1  404.84   12.71
   3  -5   1  401.33   12.71
   3  -5   1  411.20   12.64
  -3  -5  -1  424.80   12.68
   3  -5   1  422.14   12.72
   3  -5   1  411.35   12.72
  -3   5   1  442.03   12.73
  -3  -5  -1  399.26   12.68
  -3   5   1  418.37   12.75
   3   5  -1  420.58   12.72
  -3  -5  -1  409.69   12.83
  -3   5   1  399.86   12.66
  -3  -5  -1  413.72   12.79
   3   5  -1  417.68   12.74
   3   5  -1  429.00   12.77
   3   5  -1  416.48   12.72
   3  -5   1  411.98   12.69
  -3  -5  -1  399.59   12.67
  -3  -5  -1  407.89   12.67
   3  -5   1  394.64   13.01
   3  -5   1  417.35   12.73
  -3  -5  -1  392.81   12.68
   3  -5   1  425.44   12.71
  -3   5   1  407.47   12.76
   3  -5   1  423.27   12.69
  -3   5   1  405.00   12.68
  -3   5   1  408.86   12.75
  -3   5   1  404.65   12.97
  -3  -5  -1  395.99   12.71
   3  -5  -1  396.98   12.72
  -3  -5   1  435.43   12.74
   3   5   1  403.83   12.68
  -3  -5   1  412.81   12.74
   3   5   1  408.12   12.70
  -3   5  -1  416.20   13.02
   3  -5  -1  429.77   12.75
   3   5   1  414.28   12.68
   3  -5  -1  392.81   12.98
   3   5   1  418.21   12.69
   3  -5  -1  404.71   12.81
  -3  -5   1  364.59   12.78
   3   5   1  418.63   12.78
  -3  -5   1  418.15   12.79
  -3  -5   1  421.83   12.71
  -3  -5   1  406.53   12.85
   3   5   1  421.15   12.67
  -3   5  -1  404.32   12.71
  -3   5  -1  399.70   12.72
   3  -5  -1  413.50   12.72
  -3   5  -1  413.07   12.71
  -3   5  -1  391.20   12.69
   3  -5  -1  368.48   12.78
  -3   5  -1  412.91   12.69
   3   5   1  423.95   12.83
   3   5   1  405.86   12.66
  -3  -5   1  406.82   12.76
  -3   5  -1  419.62   12.73
   3   5   1  372.17   12.84
  -4  -5  -1  147.27    4.73
  -4   5   1  146.73    4.99
  -4   5   1  136.51    4.64
  -4  -5  -1  149.30    4.59
   4   5  -1  146.25    4.81
   4  -5   1  145.46    4.65
   4  -5   1  141.05    4.54
   4   5  -1  137.17    4.72
   4  -5   1  147.66    4.66
  -4   5   1  147.05    4.67
   4  -5   1  143.06    4.54
  -4  -5  -1  142.59    4.79
  -4   5   1  143.19    4.62
  -4   5   1  142.48    4.62
   4  -5   1  143.87    4.64
   4   5  -1  146.76    4.63
  -4   5   1  142.50    4.67
   4  -5   1  150.80    4.82
   4   5  -1  142.64    4.70
   4  -5   1  150.31    4.63
   4   5  -1  142.16    4.66
  -4  -5  -1  137.59    4.66
   4  -5   1  147.01    4.60
  -4   5   1  149.62    4.65
   4   5  -1  144.47    4.63
   4   5  -1  146.84    4.66
   4  -5   1  142.36    4.60
  -4  -5  -1  138.86    4.61
   4  -5   1  135.71    5.00
   4  -5   1  145.69    4.62
  -4   5  -1  148.85    4.61
   4   5   1  149.37    4.59
  -4  -5   1  146.60    4.67
   4   5   1  146.35    4.57
  -4  -5   1  150.54    4.74
   4  -5  -1  153.26    4.68
   4  -5  -1  140.64    4.99
   4   5   1  149.95    4.61
  -4   5  -1  146.78    4.63
  -4   5  -1  148.88    4.64
  -4   5  -1  145.39    4.66
  -4   5  -1  151.95    4.61
  -4  -5   1  148.04    4.82
  -4  -5   1  141.60    4.64
   4   5   1  143.67    4.73
   4  -5  -1  147.12    4.79
   4   5   1  153.71    4.80
  -4  -5   1  153.49    4.66
   4  -5  -1  141.34    4.61
   4   5   1  149.85    4.72
  -4   5  -1  149.84    5.04
  -4  -5   1  149.50    4.63
   4   5   1  149.08    4.59
   4  -5  -1  149.33    4.65
  -4   5  -1  144.01    4.66
   4  -5  -1  145.46    4.68
  -4  -5   1  165.91    4.73
   4   5   1  150.59    4.57
   4  -5  -1  148.14    4.64
  -4   5  -1  152.45    4.63
   4  -5  -1  150.13    4.79
   5  -5   1  153.10    4.90
  -5   5   1  160.79    4.98
   5   5  -1  151.79    5.10
   5  -5   1  155.50    4.95
   5  -5   1  164.93    4.98
  -5   5   1  158.53    5.50
   5  -5   1  160.83    5.03
   5  -5   1  163.83    5.21
  -5   5   1  145.05    5.05
   5   5  -1  154.16    4.99
  -5   5   1  167.92    5.01
  -5  -5  -1  155.45    5.03
  -5   5   1  159.22    5.01
  -5  -5  -1  159.71    5.11
   5  -5   1  167.83    4.99
   5  -5   1  163.83    4.96
   5   5  -1  161.45    5.09
   5  -5   1  156.45    4.98
   5   5  -1  155.18    5.03
  -5  -5  -1  162.07    4.94
  -5   5   1  160.63    5.04
   5   5  -1  160.48    5.21
   5  -5   1  153.14    5.45
   5   5  -1  165.05    5.03
  -5  -5  -1  159.01    5.20
  -5   5   1  152.18    5.03
   5   5  -1  154.53    4.99
   5  -5  -1  145.86    5.40
   5   5   1  160.82    5.08
   5   5   1  150.45    5.02
   5  -5  -1  158.12    5.18
   5   5   1  143.34    4.98
  -5  -5   1  157.90    5.03
   5  -5  -1  156.55    5.03
  -5  -5   1  146.70    5.20
   5  -5  -1  168.30    5.20
  -5   5  -1  155.98    5.04
  -5   5  -1  153.79    5.03
  -5   5  -1  155.66    4.96
   5  -5  -1  155.43    5.00
  -5   5  -1  160.77    4.96
  -5   5  -1  157.87    4.98
  -5  -5   1  159.98    5.11
   5   5   1  163.82    5.20
  -5  -5   1  156.72    5.21
  -5  -5   1  157.32    5.00
   5   5   1  151.61    5.10
   5  -5  -1  160.00    4.98
   5   5   1  157.51    4.92
  -5   5  -1  156.37    4.98
   5  -5  -1  151.39    5.00
   5   5   1  159.09    4.98
   5   5   1  160.95    4.94
   5   5   1  158.05    4.92
  -5  -5   1  162.80    4.99
   5  -5  -1  154.30    5.04
  -5  -5   1  165.03    5.02
  -5   5  -1  161.48    4.98
  -5   5  -1  155.60    5.44
  -6  -5  -1  119.94    3.78
  -6  -5  -1  115.26    4.05
  -6   5   1  117.37    3.82
   6  -5   1  117.12    3.75
  -6   5   1  118.18    3.82
  -6   5   1  120.39    3.78
   6  -5   1  109.82    4.31
  -6  -5  -1  118.33    3.72
   6  -5   1  120.96    3.78
  -6  -5  -1  118.19    3.93
   6   5  -1  121.66    3.83
  -6  -5  -1  118.42    3.73
  -6  -5  -1  118.94    3.71
   6   5  -1  112.08    3.93
   6  -5   1  117.17    3.79
  -6  -5  -1  112.83    3.85
   6  -5   1  119.61    3.76
   6  -5   1  116.97    3.71
  -6   5   1  115.86    3.85
   6   5  -1  112.81    3.83
  -6   5   1  114.92    3.82
   6   5  -1  115.02    3.79
   6   5  -1  118.28    3.92
  -6  -5  -1  117.65    3.81
   6  -5   1  123.13    3.77
   6   5   1  122.32    3.80
  -6   5  -1  119.23    3.78
   6   5   1  122.18    3.73
  -6  -5   1  108.74    3.95
  -6   5  -1  124.63    3.79
   6   5   1  120.00    3.71
   6  -5  -1  117.96    3.86
  -6   5  -1  118.96    3.77
  -6  -5   1  120.05    3.82
   6   5   1  121.34    3.71
  -6  -5   1  120.83    3.81
  -6   5  -1  120.57    3.76
   6   5   1  120.46    3.89
   6  -5  -1  115.80    3.80
  -6   5  -1  123.09    3.76
  -6  -5   1  117.28    4.07
   6  -5  -1  110.68    4.29
   6  -5  -1  119.46    3.78
  -6  -5   1  119.04    3.84
   6   5   1  123.50    3.74
  -6  -5   1  122.54    3.80
  -6   5  -1  119.28    3.86
  -6   5  -1  118.59    3.87
   6   5   1  116.59    3.93
   6   5   1  111.75    3.87
   6  -5  -1  123.01    3.85
  -7  -5  -1   16.40    0.67
   7   5  -1   16.33    0.80
   7   5  -1   16.81    0.99
   7  -5   1   15.43    0.63
   7  -5   1   16.08    0.70
   7   5  -1   15.37    0.89
   7  -5   1   16.49    0.67
  -7  -5  -1   15.97    0.83
  -7   5   1   15.56    0.84
   7   5  -1   15.94    0.76
  -7  -5  -1   16.52    0.63
   7   5  -1   14.93    1.00
   7  -5   1   16.23    0.72
  -7  -5  -1   16.32    0.90
  -7   5   1   15.98    0.87
  -7  -5  -1   16.55    0.67
  -7  -5  -1   16.69    0.67
  -7   5   1   16.30    0.95
  -7   5   1   16.77    0.77
  -7   5   1   15.52    0.83
   7  -5   1   16.03    0.77
   7  -5   1   13.71    1.47
  -7   5   1   15.88    0.85
  -7  -5  -1   15.78    1.16
  -7  -5   1   17.23    0.79
   7   5   1   17.40    0.71
   7   5   1   17.01    0.65
  -7  -5   1   15.66    0.83
   7  -5  -1   13.79    1.47
   7  -5  -1   17.06    0.75
  -7   5  -1   16.63    0.71
   7   5   1   16.65    0.88
   7   5   1   16.96    0.64
   7  -5  -1   16.21    0.79
   7  -5  -1   16.80    0.83
  -7   5  -1   16.67    0.91
   7   5   1   16.65    0.63
  -7  -5   1   16.59    1.18
  -7   5  -1   17.00    0.71
  -7  -5   1   16.92    0.82
   7   5   1   17.34    1.01
  -7  -5   1   17.02    0.85
  -7   5  -1   16.34    0.72
   7  -5  -1   17.37    0.97
  -7   5  -1   16.34    0.73
   7   5   1   15.58    0.88
  -7   5  -1   16.44    0.91
  -8  -5  -1  190.64    6.40
   8  -5   1  184.88    6.79
  -8   5   1  201.50    6.07
   8  -5   1  185.08    5.95
   8   5  -1  196.76    6.08
   8  -5   1  188.62    6.02
  -8   5   1  193.53    6.07
   8   5  -1  190.07    6.84
  -8  -5  -1  192.30    5.95
  -8   5   1  189.65    6.10
   8   5  -1  186.65    6.21
  -8  -5  -1  191.56    6.15
  -8  -5  -1  190.85    5.94
  -8  -5  -1  193.04    6.08
   8   5  -1  194.01    6.04
   8   5  -1  191.79    6.09
  -8  -5  -1  196.53    5.96
  -8   5   1  194.42    6.16
  -8   5   1  194.09    6.04
   8  -5   1  190.74    5.98
   8  -5   1  201.01    6.02
   8  -5   1  205.42    5.99
   8   5   1  185.25    6.82
   8  -5  -1  188.76    6.10
  -8  -5   1  189.36    6.08
  -8  -5   1  191.24    6.08
   8  -5  -1  165.81    6.17
  -8  -5   1  189.16    6.06
   8   5   1  183.56    6.20
  -8  -5   1  187.24    6.15
  -8   5  -1  190.23    5.99
   8   5   1  195.63    5.97
  -8   5  -1  182.70    6.13
  -8  -5   1  182.95    6.39
  -8  -5   1  189.11    6.03
   8  -5  -1  192.62    6.10
  -8   5  -1  187.68    6.14
   8   5   1  186.87    5.95
   8   5   1  190.71    5.94
   8  -5  -1  178.33    6.74
  -8   5  -1  188.65    6.01
  -8   5  -1  187.94    5.99
   9   5  -1   49.55    1.76
  -9   5   1   48.74    1.85
   9   5  -1   49.02    2.04
  -9  -5  -1   50.73    1.67
  -9   5   1   51.37    1.99
   9  -5   1   51.08    1.69
  -9   5   1   50.99    1.82
   9   5  -1   48.51    1.82
   9   5  -1   50.17    1.87
   9  -5   1   52.12    1.69
  -9  -5  -1   51.65    1.67
  -9   5   1   51.56    1.92
   9  -5   1   51.58    1.74
  -9  -5  -1   49.45    1.64
   9  -5   1   49.58    2.75
   9  -5   1   49.78    1.76
  -9  -5  -1   49.08    2.28
  -9   5   1   50.30    1.85
  -9  -5  -1   51.14    1.88
   9   5  -1   47.12    2.79
   9  -5   1   50.80    1.67
  -9   5   1   49.35    1.90
  -9  -5  -1   50.31    1.95
   9   5   1   46.81    2.76
  -9  -5   1   49.52    1.79
   9  -5  -1   48.22    1.79
   9  -5  -1   46.96    2.76
   9  -5  -1   50.33    1.82
  -9   5  -1   47.61    1.72
   9   5   1   48.63    1.65
  -9   5  -1   48.32    1.72
  -9  -5   1   50.75    1.82
   9  -5  -1   46.99    1.88
   9  -5  -1   49.94    1.87
  -9  -5   1   48.54    1.95
  -9  -5   1   49.38    1.82
  -9   5  -1   48.31    1.94
   9   5   1   49.17    2.00
  -9  -5   1   49.50    1.88
  -9  -5   1   49.84    2.29
  -9   5  -1   49.85    1.74
  -9   5  -1   47.64    1.94
   9   5   1   49.58    1.70
   9   5   1   49.64    1.64
 -10  -5  -1   73.30    2.29
  10   5  -1   68.92    2.67
 -10   5   1   71.65    2.55
 -10  -5  -1   73.10    2.54
  10  -5   1   70.99    2.30
 -10   5   1   69.23    2.53
  10   5  -1   72.11    2.38
  10  -5   1   64.70    3.97
  10   5  -1   71.76    2.50
 -10  -5  -1   70.81    2.74
 -10  -5  -1   71.96    2.99
 -10   5   1   71.65    2.48
  10  -5   1   69.65    2.38
  10   5  -1   72.03    3.61
 -10   5   1   69.77    3.13
 -10  -5   1   70.42    2.45
  10  -5  -1   67.62    3.51
  10  -5  -1   69.01    2.44
  10   5   1   71.03    2.31
  10  -5  -1   69.09    2.45
 -10  -5   1   71.92    2.88
  10  -5  -1   66.64    2.51
 -10   5  -1   59.54    3.06
 -10   5  -1   68.81    2.35
 -10  -5   1   69.15    2.45
  10   5   1   66.41    2.62
 -10   5  -1   69.25    2.59
  10   5   1   71.95    4.24
  10   5   1   68.59    2.26
 -10  -5   1   68.37    2.54
 -10  -5   1   68.48    3.15
 -11   5   1   31.51    1.64
 -11   5   1   30.11    1.43
  11   5  -1   29.50    1.57
  11   5  -1   32.40    2.76
 -11   5   1   34.87    1.77
  11  -5   1   32.21    1.32
 -11  -5  -1   33.61    2.07
  11   5  -1   31.56    1.70
 -11  -5  -1   32.81    1.55
 -11  -5  -1   32.92    1.61
  11  -5   1   34.37    2.65
 -11  -5  -1   31.38    1.18
 -11   5  -1   31.69    1.63
 -11  -5   1   31.38    1.55
  11  -5  -1   32.22    1.43
  11   5   1   31.54    1.61
  11  -5  -1   30.72    1.48
 -11  -5   1   31.60    1.59
  11   5   1   32.25    1.21
 -11  -5   1   31.61    1.58
  11   5   1   34.13    2.71
  11  -5  -1   33.63    2.72
 -11  -5   1   30.05    2.06
 -11   5  -1   31.44    1.28
 -11   5  -1   30.89    1.59
 -12  -5  -1   17.22    1.36
  12   5  -1   20.76    2.75
 -12   5   1   20.29    1.41
  12  -5   1   21.98    2.47
  12   5  -1   21.34    1.53
 -12   5   1   20.71    1.50
 -12  -5  -1   20.13    0.88
 -12   5   1   18.40    1.21
 -12  -5  -1   20.71    1.98
  12   5  -1   19.74    1.25
 -12  -5  -1   19.23    1.42
 -12  -5   1   19.11    1.37
 -12   5  -1   19.15    1.18
 -12  -5   1   20.17    1.20
  12  -5  -1   19.38    1.25
 -12  -5   1   19.50    1.36
 -12   5  -1   20.53    1.45
  12  -5  -1   24.71    2.71
 -12   5  -1   21.98    1.44
  12   5   1   20.53    2.67
  12   5   1   19.73    1.45
  12   5   1   20.21    0.87
 -12  -5   1   21.52    1.98
 -13  -5  -1    6.30    0.99
  13   5  -1    8.60    2.19
 -13   5   1    5.94    0.79
  13   5  -1    7.18    1.11
  13   5  -1    4.94    0.80
 -13  -5  -1    7.40    1.00
  13  -5   1    7.61    1.79
 -13   5   1    6.89    1.00
  13  -5   1    6.55    0.80
 -13  -5  -1    6.14    1.16
 -13   5   1    5.40    1.04
 -13   5  -1    7.78    0.84
 -13  -5   1    6.72    0.98
  13   5   1    7.82    2.12
  13   5   1    8.61    1.34
  13  -5  -1    8.69    1.09
 -13  -5   1    5.17    1.13
 -13   5  -1    7.56    1.04
 -13  -5   1    5.58    1.03
  13  -5  -1   11.62    2.83
 -13  -5   1    5.88    0.74
 -13   5  -1    8.15    1.06
 -14  -5  -1   29.33    3.28
 -14   5   1   34.54    2.43
  14   5  -1   34.24    3.31
  14   5  -1   26.87    1.56
 -14   5   1   26.28    1.60
  14   5  -1   30.44    1.95
 -14  -5  -1   29.26    1.89
 -14   5   1   25.67    1.82
 -14  -5   1   25.65    1.89
 -14  -5   1   25.50    1.51
  14  -5  -1   27.05    1.60
 -14   5  -1   27.55    1.77
 -14   5  -1   29.28    2.23
  14   5   1   29.29    1.87
  14  -5  -1   35.66    3.36
  15   5  -1   37.58    1.84
   0  -6   1  525.93   15.96
   0  -6   1  497.59   15.84
   0   6  -1  488.25   15.85
   0   6  -1  527.60   15.87
   0   6   1  543.56   15.83
   0   6  -1  514.16   15.88
   0  -6   1  496.81   15.85
   0  -6  -1  532.72   15.84
   0   6  -1  507.56   15.84
   0   6   1  479.22   15.85
   0   6  -1  517.16   15.95
   0   6  -1  525.89   15.84
   0   6   1  533.83   15.84
   0   6   1  519.84   15.91
   0  -6   1  513.07   15.84
   0  -6  -1  531.92   15.86
   0  -6   1  482.19   15.86
   0   6   1  507.67   15.85
   0  -6   1  488.71   15.88
   0  -6  -1  491.12   15.83
   0   6   1  505.31   15.83
   0   6   1  520.94   15.88
   0  -6  -1  514.68   15.86
   1  -6   1   27.73    1.01
  -1  -6  -1   29.59    0.94
  -1   6   1   29.68    1.08
   1  -6   1   29.04    0.99
   1   6  -1   28.44    1.07
  -1   6   1   30.89    1.05
  -1  -6  -1   29.21    1.01
  -1   6   1   29.00    1.03
  -1   6   1   27.31    1.06
  -1  -6  -1   28.92    1.04
  -1  -6  -1   28.56    1.01
  -1  -6  -1   28.64    1.13
   1   6  -1   27.38    1.09
   1  -6   1   28.83    1.03
   1  -6   1   27.64    1.05
  -1  -6  -1   30.82    1.04
   1   6  -1   28.93    1.06
  -1   6   1   29.86    1.06
   1   6  -1   28.44    1.03
  -1   6   1   31.78    1.41
   1   6  -1   28.83    1.06
   1   6  -1   29.20    1.19
   1  -6   1   29.71    1.12
   1  -6   1   29.06    1.19
  -1   6   1   28.17    1.03
   1  -6  -1   28.54    1.15
   1  -6  -1   28.66    1.04
   1  -6  -1   28.95    1.07
  -1   6  -1   29.35    1.02
   1   6   1   29.14    1.10
  -1   6  -1   27.91    1.02
  -1  -6   1   30.66    1.06
  -1   6  -1   29.97    1.41
  -1  -6   1   28.05    0.94
  -1   6  -1   28.06    1.02
   1   6   1   27.99    1.01
   1   6   1   30.66    1.04
  -1  -6   1   28.64    1.07
   1  -6  -1   27.89    1.04
   1   6   1   29.15    1.01
  -1  -6   1   28.20    1.03
  -1  -6   1   28.56    1.08
  -1   6  -1   29.64    1.12
  -1   6  -1   28.37    0.99
   1   6   1   28.74    1.11
   1  -6  -1   26.89    0.92
  -1  -6   1   27.60    1.06
  -1   6  -1   29.21    1.05
   1  -6  -1   30.89    1.08
   1  -6  -1   27.99    1.06
   1   6   1   29.75    1.03
  -1  -6   1   27.94    1.04
  -2   6   1   12.32    0.59
  -2   6   1   11.92    0.61
  -2  -6  -1   11.67    0.70
   2   6  -1   11.97    0.62
  -2   6   1   11.83    0.48
   2  -6   1   11.86    0.55
   2   6  -1   11.20    0.57
   2  -6   1   11.39    0.58
   2   6  -1   11.67    0.62
  -2  -6  -1   12.50    0.55
   2   6  -1   11.20    0.60
  -2  -6  -1   11.54    0.52
   2  -6   1   11.52    0.59
  -2   6   1   11.39    0.92
   2   6  -1   11.55    0.77
  -2  -6  -1   11.52    0.52
  -2   6   1   11.27    0.61
   2  -6   1   12.55    0.61
  -2  -6  -1   11.82    0.55
   2  -6   1   10.86    0.47
  -2  -6  -1   10.83    0.53
   2   6  -1   12.23    0.58
  -2   6   1   11.41    0.59
   2  -6   1   12.54    1.00
   2  -6   1   12.50    0.56
  -2   6   1   11.59    0.58
   2  -6   1   11.64    0.55
   2  -6   1   11.14    0.69
  -2  -6   1   12.72    0.62
   2  -6  -1   10.09    0.72
  -2   6  -1   12.95    0.56
  -2   6  -1   12.71    0.53
  -2  -6   1   13.11    0.75
   2   6   1   13.35    0.56
  -2  -6   1   13.96    0.62
  -2   6  -1   13.76    0.68
   2  -6  -1   13.37    0.62
   2   6   1   13.87    0.53
   2   6   1   13.46    0.53
  -2  -6   1   13.43    0.68
   2   6   1   14.16    0.73
   2  -6  -1   13.10    0.48
  -2   6  -1   13.20    0.95
   2   6   1   13.87    0.52
   2  -6  -1   12.30    0.59
   2   6   1   13.88    0.56
  -2   6  -1   13.92    0.60
  -2   6  -1   14.56    0.57
  -2  -6   1   14.05    0.58
  -2  -6   1   12.74    0.59
  -2   6  -1   13.47    0.56
   2   6   1   12.32    0.69
   2  -6  -1   12.17    0.63
  -2   6  -1   13.33    0.60
  -2  -6   1   12.98    0.63
   2  -6  -1   13.95    0.61
   2   6   1   12.88    0.66
   3   6  -1  777.45   24.42
  -3   6   1  791.45   24.40
   3  -6   1  793.35   24.37
   3   6  -1  753.57   24.41
  -3  -6  -1  817.58   24.37
   3   6  -1  759.54   24.47
   3  -6   1  755.44   24.44
   3   6  -1  768.71   24.39
   3  -6   1  814.53   24.39
  -3  -6  -1  784.86   24.47
   3   6  -1  786.77   24.39
   3   6  -1  837.61   24.42
  -3   6   1  786.89   24.40
  -3   6   1  748.11   24.42
   3   6  -1  796.59   24.54
  -3   6   1  777.26   24.37
  -3   6   1  790.55   24.68
  -3   6   1  816.91   24.43
   3  -6   1  803.83   24.40
   3  -6  -1  764.48   24.75
  -3   6  -1  806.83   24.73
   3   6   1  782.35   24.35
  -3  -6   1  760.38   24.54
   3  -6  -1  784.14   24.42
   3   6   1  792.00   24.37
   3  -6  -1  817.91   24.40
   3  -6  -1  857.41   24.51
   3  -6  -1  760.05   24.39
  -3  -6   1  806.61   24.42
   3   6   1  786.86   24.46
   3  -6  -1  778.63   24.35
  -3   6  -1  799.27   24.41
   3   6   1  757.00   24.47
  -3  -6   1  781.42   24.40
  -3  -6   1  804.96   24.39
  -3  -6   1  792.56   24.41
  -3  -6   1  800.28   24.47
   3   6   1  834.28   24.53
  -3   6  -1  728.22   24.41
  -3   6  -1  773.59   24.39
   3  -6  -1  800.16   24.42
  -4  -6  -1  398.33   12.82
   4   6  -1  413.82   12.85
  -4  -6  -1  413.57   12.95
  -4  -6  -1  414.75   12.82
  -4  -6  -1  404.51   12.80
   4   6  -1  397.76   12.88
  -4   6   1  417.23   12.83
  -4   6   1  401.79   12.89
  -4   6   1  397.55   12.82
   4   6  -1  425.40   12.88
  -4   6   1  440.73   12.90
   4  -6   1  383.74   12.93
   4  -6   1  409.88   12.87
   4  -6   1  414.14   12.87
   4   6  -1  390.92   12.94
  -4  -6  -1  396.14   12.86
   4  -6   1  387.24   13.23
   4   6  -1  417.39   12.86
  -4  -6  -1  411.87   13.02
   4  -6   1  420.50   12.83
  -4   6   1  407.65   12.76
   4  -6   1  410.08   12.85
  -4  -6  -1  407.32   12.82
   4   6  -1  412.77   12.90
  -4   6   1  419.85   12.87
   4   6  -1  427.80   13.04
  -4   6   1  424.04   13.23
  -4   6   1  413.16   12.87
   4  -6   1  397.85   12.83
  -4   6  -1  398.84   12.85
   4  -6  -1  399.70   13.22
   4  -6  -1  448.46   13.01
  -4  -6   1  434.37   12.86
   4   6   1  420.69   12.82
  -4   6  -1  431.28   13.27
   4  -6  -1  406.33   12.86
   4   6   1  418.54   12.82
  -4  -6   1  442.24   12.89
  -4  -6   1  432.22   12.96
   4   6   1  375.20   12.83
   4  -6  -1  421.08   12.90
  -4   6  -1  383.49   12.87
  -4  -6   1  421.61   12.91
   4   6   1  399.11   12.95
  -4  -6   1  422.29   12.89
  -4   6  -1  404.49   12.87
   4  -6  -1  431.25   12.87
  -4   6  -1  408.41   12.83
   4   6   1  421.00   12.94
  -4  -6   1  415.93   13.04
   4  -6  -1  405.95   12.89
   4  -6  -1  431.94   13.01
   4   6   1  412.88   12.80
  -4  -6   1  406.51   12.86
   4   6   1  434.77   13.02
  -4   6  -1  417.47   12.88
   4   6   1  418.11   12.80
  -4   6  -1  421.54   12.86
  -4   6  -1  426.75   12.86
  -5  -6  -1  158.81    4.74
   5   6  -1  171.01    4.90
  -5  -6  -1  149.30    5.00
   5   6  -1  154.39    4.82
  -5  -6  -1  152.55    4.91
  -5   6   1  149.83    4.83
   5  -6   1  157.01    5.02
  -5  -6  -1  149.52    4.82
  -5  -6  -1  153.82    4.73
  -5   6   1  151.24    4.81
   5  -6   1  140.48    5.24
   5   6  -1  149.01    4.78
  -5   6   1  148.61    4.75
   5  -6   1  152.32    4.79
  -5   6   1  151.83    4.80
   5   6  -1  149.02    4.78
  -5   6   1  145.12    5.21
   5   6  -1  148.45    4.82
   5   6  -1  150.32    5.00
  -5   6   1  152.62    4.84
  -5  -6  -1  145.00    4.91
  -5  -6  -1  147.45    4.73
   5  -6   1  152.41    4.82
   5  -6   1  147.34    4.78
   5  -6   1  156.00    4.76
   5   6  -1  144.76    4.91
   5  -6   1  157.79    4.76
  -5   6   1  137.54    4.83
   5   6   1  147.00    4.91
  -5  -6   1  157.13    4.79
   5  -6  -1  142.82    5.23
   5   6   1  152.54    4.76
  -5  -6   1  150.85    4.91
  -5   6  -1  153.61    4.78
  -5   6  -1  159.86    4.79
   5   6   1  146.08    4.80
  -5  -6   1  148.71    4.80
   5   6   1  150.98    4.88
  -5  -6   1  144.95    5.00
   5  -6  -1  151.29    4.81
  -5   6  -1  147.63    4.76
   5  -6  -1  148.62    4.75
  -5  -6   1  154.63    4.81
   5   6   1  155.80    5.00
  -5   6  -1  153.26    4.78
   5   6   1  155.68    4.74
  -5   6  -1  152.88    4.76
  -5   6  -1  145.59    5.24
   5  -6  -1  145.94    4.79
   5  -6  -1  154.84    4.84
  -5   6  -1  147.15    4.82
  -5  -6   1  148.38    4.82
   5  -6  -1  152.48    4.98
  -5   6  -1  146.84    4.82
   5  -6  -1  145.09    4.83
   5  -6  -1  143.07    4.96
   5   6   1  155.60    4.72
   5   6   1  154.55    4.74
   5   6   1  150.90    4.72
   6  -6   1   34.23    1.27
  -6   6   1   29.94    1.59
  -6  -6  -1   34.25    1.27
   6   6  -1   32.86    1.33
   6   6  -1   33.79    1.39
  -6   6   1   35.16    1.23
   6  -6   1   35.45    1.22
   6  -6   1   30.36    1.85
  -6  -6  -1   33.50    1.34
   6  -6   1   34.92    1.24
   6  -6   1   32.78    1.09
  -6  -6  -1   33.89    1.19
   6   6  -1   32.50    1.45
   6  -6   1   33.16    1.20
  -6  -6  -1   33.46    1.58
  -6  -6  -1   35.01    1.20
  -6   6   1   34.63    1.31
  -6   6   1   34.91    1.30
   6   6  -1   33.65    1.30
  -6   6   1   33.40    1.29
   6   6  -1   33.87    1.26
  -6  -6   1   35.98    1.28
   6  -6  -1   34.69    1.22
  -6   6  -1   34.52    1.23
   6  -6  -1   32.95    1.89
   6   6   1   35.28    1.16
   6   6   1   33.97    1.37
  -6   6  -1   33.92    1.35
   6   6   1   33.51    1.45
  -6  -6   1   35.46    1.31
   6   6   1   36.79    1.25
  -6  -6   1   34.30    1.59
   6  -6  -1   36.21    1.33
   6   6   1   35.91    1.22
   6  -6  -1   34.97    1.35
  -6   6  -1   36.18    1.25
   6   6   1   34.98    1.31
  -6  -6   1   36.33    1.28
  -6   6  -1   38.31    1.34
   6   6   1   34.96    1.17
  -6   6  -1   34.74    1.22
   6   6   1   35.64    1.18
  -6  -6   1   33.57    1.30
  -6   6  -1   34.18    1.23
  -6   6  -1   33.63    1.35
   7   6  -1  142.13    4.58
  -7  -6  -1  148.32    4.51
  -7  -6  -1  141.46    4.66
   7  -6   1  142.91    4.54
  -7  -6  -1  145.93    4.52
  -7  -6  -1  142.87    4.91
   7  -6   1  139.52    4.46
   7   6  -1  142.61    4.72
  -7  -6  -1  144.31    4.50
  -7   6   1  146.05    4.61
   7  -6   1  137.13    5.26
  -7   6   1  141.69    4.62
   7   6  -1  151.67    4.64
  -7   6   1  144.54    4.68
  -7  -6  -1  146.10    4.61
   7   6  -1  142.87    4.64
  -7   6   1  151.98    4.57
  -7   6   1  142.41    4.62
   7  -6   1  150.72    4.58
   7  -6   1  148.07    4.59
  -7   6   1  145.86    4.70
   7  -6   1  153.65    4.54
   7   6  -1  140.93    4.77
  -7  -6   1  136.44    4.59
  -7   6  -1  141.38    4.67
   7  -6  -1  133.02    5.21
  -7  -6   1  140.65    4.62
  -7   6  -1  144.93    4.55
  -7   6  -1  140.81    4.67
  -7   6  -1  138.27    4.57
   7   6   1  142.87    4.52
  -7  -6   1  142.38    4.59
  -7   6  -1  140.50    4.55
   7   6   1  147.37    4.52
   7  -6  -1  144.06    4.65
   7   6   1  141.62    4.76
   7  -6  -1  140.72    4.55
  -7  -6   1  143.70    4.59
   7  -6  -1  135.69    4.64
   7   6   1  143.04    4.49
  -7  -6   1  140.28    4.92
   7   6   1  141.85    4.50
   7  -6  -1  143.87    4.62
  -7   6  -1  141.15    4.53
   7   6   1  138.80    4.65
   8  -6   1   34.84    1.26
  -8  -6  -1   34.13    1.44
  -8   6   1   35.60    1.28
  -8  -6  -1   34.55    1.19
   8   6  -1   33.91    1.35
  -8   6   1   34.83    1.37
  -8  -6  -1   34.35    1.77
   8  -6   1   30.03    2.14
  -8  -6  -1   33.89    1.37
   8  -6   1   31.40    1.22
  -8   6   1   32.97    1.48
  -8   6   1   33.97    1.37
   8   6  -1   34.02    1.28
   8  -6   1   33.84    1.30
  -8   6   1   33.60    1.43
   8  -6   1   34.09    1.22
  -8  -6  -1   33.84    1.16
   8   6  -1   33.85    1.57
  -8  -6  -1   34.10    1.19
  -8   6   1   33.91    1.39
   8   6  -1   32.02    1.40
  -8  -6   1   33.95    1.34
   8  -6  -1   33.42    1.37
  -8  -6   1   32.05    1.32
   8  -6  -1   33.42    1.35
   8  -6  -1   29.97    2.17
  -8  -6   1   32.22    1.35
  -8  -6   1   33.34    1.45
   8   6   1   33.67    1.16
  -8   6  -1   33.41    1.26
   8   6   1   33.07    1.17
   8  -6  -1   34.98    1.25
  -8  -6   1   32.19    1.74
  -8   6  -1   35.28    1.25
  -8   6  -1   34.14    1.20
  -8   6  -1   33.41    1.25
  -8   6  -1   32.94    1.45
  -8   6  -1   33.30    1.45
   8   6   1   34.29    1.23
   8  -6  -1   32.07    1.40
   8   6   1   32.72    1.53
  -8  -6   1   34.36    1.37
   9   6  -1   10.97    1.88
  -9  -6  -1   10.95    0.53
   9  -6   1   10.23    0.50
   9  -6   1   10.94    0.64
   9  -6   1    9.32    1.69
   9  -6   1   12.01    0.74
  -9   6   1   10.77    0.84
   9   6  -1   11.08    0.89
  -9  -6  -1   11.72    0.89
  -9  -6  -1   11.68    0.58
  -9   6   1   11.00    0.91
  -9   6   1   11.31    0.85
   9   6  -1   11.02    0.66
  -9   6   1   11.76    0.71
  -9  -6  -1   10.55    1.30
  -9  -6  -1   10.68    0.94
   9   6  -1   10.67    1.06
   9  -6   1   11.69    0.60
  -9   6   1   11.72    0.93
   9   6  -1   11.12    0.76
  -9   6   1   10.97    1.01
  -9  -6  -1   12.15    0.62
   9   6   1   11.01    0.54
  -9   6  -1   11.63    0.65
  -9  -6   1   10.68    0.83
  -9  -6   1    9.56    1.31
  -9   6  -1   10.57    0.96
   9  -6  -1   11.62    0.89
  -9   6  -1   11.96    0.96
   9   6   1   11.40    1.03
  -9  -6   1   11.18    0.94
   9  -6  -1    9.85    1.82
  -9   6  -1   10.97    0.67
  -9  -6   1   10.01    0.88
   9   6   1   10.86    0.55
   9   6   1   11.73    1.78
  -9   6  -1   11.27    0.69
   9   6   1   11.65    0.67
   9  -6  -1   11.54    0.82
  -9  -6   1   12.12    0.75
  -9  -6   1   11.93    0.75
   9  -6  -1   10.49    0.80
  10   6  -1   16.09    1.05
  10   6  -1   18.91    1.31
  10   6  -1   16.19    2.30
 -10  -6  -1   17.63    1.11
  10   6  -1   17.99    0.83
 -10   6   1   16.72    1.04
 -10   6   1   17.57    1.13
  10  -6   1   16.74    0.91
  10  -6   1   17.23    0.67
 -10   6   1   15.61    1.95
 -10   6   1   17.10    1.15
 -10  -6  -1   17.36    0.78
  10  -6   1   13.35    2.34
 -10   6  -1   15.96    1.37
 -10   6  -1   18.36    1.19
 -10  -6   1   16.05    0.91
 -10  -6   1   17.62    1.11
  10   6   1   16.42    1.21
  10  -6  -1   18.13    1.04
 -10  -6   1   13.79    1.38
 -10  -6   1   14.36    2.12
 -10  -6   1   17.58    1.00
  10  -6  -1   17.29    2.24
  10  -6  -1   18.00    0.95
 -10   6  -1   17.10    0.87
  10  -6  -1   15.80    1.07
  10   6   1   17.45    0.83
  11  -6   1   39.92    2.84
  11   6  -1   34.39    2.90
  11   6  -1   37.00    1.59
 -11  -6  -1   37.47    1.68
  11  -6   1   36.99    1.46
 -11   6   1   36.89    1.78
 -11   6   1   35.84    1.57
 -11  -6  -1   37.11    1.73
 -11  -6  -1   37.49    1.32
 -11   6   1   33.52    1.95
 -11  -6  -1   37.67    2.19
  11   6   1   35.28    1.76
 -11  -6   1   35.51    1.55
 -11   6  -1   35.14    1.72
 -11   6  -1   35.46    1.42
 -11  -6   1   35.00    1.72
 -11   6  -1   35.77    1.73
 -11  -6   1   34.37    2.20
  11  -6  -1   34.98    1.61
  11   6   1   36.38    2.86
 -11  -6   1   35.88    1.65
  11  -6  -1   37.86    2.89
  11   6   1   36.43    1.35
  12  -6   1   13.99    0.94
 -12  -6  -1   14.03    0.80
 -12   6   1   13.15    1.10
 -12  -6  -1   13.04    1.25
 -12   6   1   13.36    1.30
  12   6  -1   13.02    1.12
 -12   6   1   12.30    1.37
 -12  -6  -1   14.95    1.32
  12   6  -1   13.20    2.69
  12  -6   1   13.94    2.41
 -12  -6  -1   11.34    1.80
  12   6  -1   12.16    1.40
 -12   6  -1   13.47    0.91
 -12  -6   1   12.76    1.84
 -12   6  -1   14.32    1.31
 -12  -6   1   12.14    1.29
 -12   6  -1   13.00    1.32
  12  -6  -1   15.07    2.61
  12  -6  -1   13.66    1.12
 -12  -6   1   13.96    1.08
  12   6   1   12.37    1.33
 -12  -6   1   12.99    1.26
  12   6   1   11.64    0.72
  12   6   1   14.77    2.65
  13  -6   1   37.96    1.61
 -13   6   1   38.15    2.02
 -13  -6  -1   37.21    1.99
  13   6  -1   39.09    2.15
 -13  -6  -1   38.90    2.03
 -13  -6  -1   38.55    2.63
  13   6  -1   41.12    3.66
  13   6  -1   37.72    1.79
  13  -6   1   45.16    3.48
 -13   6   1   40.11    1.82
 -13   6   1   39.19    2.11
  13   6   1   38.82    2.08
 -13   6  -1   39.09    2.05
 -13  -6   1   38.63    2.00
 -13   6  -1   40.90    2.06
  13  -6  -1   38.57    1.85
 -13  -6   1   38.99    2.68
 -13   6  -1   38.65    1.62
 -13  -6   1   38.03    1.73
  13   6   1   42.06    3.57
  13  -6  -1   43.91    3.59
 -13  -6   1   41.00    2.03
 -14  -6  -1   17.16    1.64
  14   6  -1   19.64    1.76
  14   6  -1   25.32    4.21
  14   6  -1   15.15    1.31
 -14   6   1   18.10    1.35
 -14   6   1   17.75    1.62
 -14   6  -1   17.32    1.53
  14  -6  -1   15.28    1.33
 -14  -6   1   13.98    1.65
 -14  -6   1   16.11    1.31
  14   6   1   19.81    1.61
   0  -7  -1   12.36    0.59
   0   7   1   12.34    0.64
   0   7  -1   12.55    0.48
   0   7  -1   12.46    0.58
   0  -7  -1   10.79    0.55
   0   7  -1   12.15    0.63
   0   7   1   12.62    0.61
   0   7  -1   12.82    0.61
   0   7  -1   11.66    0.58
   0   7   1   11.85    0.56
   0  -7  -1   13.59    0.75
   0  -7   1   12.48    0.60
   0  -7   1   11.89    0.47
   0  -7  -1   13.42    0.59
   0   7  -1   11.92    0.62
   0  -7   1   12.80    0.58
   0   7  -1   12.28    0.78
   0   7   1   11.78    0.57
   0  -7   1   12.10    0.59
   0   7  -1   12.40    0.61
   0  -7   1   12.49    0.62
   0  -7   1   13.13    0.78
   0  -7   1   12.02    0.59
   0   7   1   12.18    0.60
   0  -7   1   12.25    0.64
   0  -7  -1   12.41    0.57
   0   7   1   12.21    0.64
   0   7   1   14.01    0.75
   1   7  -1  507.59   15.78
   1  -7   1  514.33   15.90
  -1   7   1  512.02   15.78
  -1   7   1  511.91   15.77
   1   7  -1  481.94   15.79
   1   7  -1  510.57   15.77
   1  -7   1  470.61   15.81
   1   7  -1  533.96   15.90
   1  -7   1  504.21   15.78
  -1  -7  -1  508.29   15.76
  -1   7   1  541.16   16.07
   1  -7   1  507.06   15.71
   1   7  -1  504.21   15.76
  -1   7   1  490.03   15.78
  -1  -7  -1  502.01   15.74
   1  -7   1  503.58   15.78
   1  -7   1  502.46   15.74
   1  -7   1  483.50   15.75
  -1  -7  -1  532.02   15.77
   1   7  -1  520.71   15.76
   1   7  -1  477.21   15.78
  -1   7   1  499.84   15.75
  -1  -7  -1  512.18   15.74
   1  -7   1  494.30   15.75
   1   7   1  494.94   15.81
  -1  -7   1  499.01   15.79
   1  -7  -1  490.97   15.67
   1  -7  -1  479.13   15.75
   1   7   1  534.59   15.86
  -1   7  -1  492.39   15.75
  -1  -7   1  514.61   15.78
   1   7   1  489.21   15.76
   1  -7  -1  497.43   15.78
   1   7   1  505.97   15.76
   1  -7  -1  521.72   15.78
   1  -7  -1  531.20   15.76
   1   7   1  514.14   15.74
  -1  -7   1  518.46   15.89
  -1   7  -1  504.64   15.72
  -1   7  -1  515.36   15.78
  -1   7  -1  514.61   15.75
   1   7   1  496.21   15.74
  -1  -7   1  549.06   15.79
  -1   7  -1  504.20   15.74
  -1  -7   1  500.09   15.68
  -1  -7   1  508.29   15.79
  -1  -7   1  538.50   15.76
   1   7   1  524.37   15.82
  -1   7  -1  533.84   16.08
   1  -7  -1  523.55   15.86
   1  -7  -1  524.94   15.78
  -1  -7   1  481.89   15.76
  -2   7   1  207.02    6.68
   2  -7   1  200.51    6.39
   2  -7   1  200.75    6.32
  -2  -7  -1  201.63    6.35
  -2   7   1  207.13    6.41
   2   7  -1  209.25    6.40
  -2  -7  -1  185.67    6.39
  -2   7   1  201.68    6.36
   2   7  -1  219.72    6.42
  -2  -7  -1  203.45    6.38
   2   7  -1  190.95    6.47
   2  -7   1  194.31    6.46
  -2   7   1  200.36    6.38
   2  -7   1  204.31    6.41
   2   7  -1  199.07    6.37
   2   7  -1  203.39    6.38
  -2   7   1  218.78    6.39
   2  -7   1  204.06    6.37
   2  -7   1  210.45    6.37
   2   7  -1  211.23    6.53
  -2  -7  -1  214.91    6.37
   2  -7   1  208.43    6.35
  -2   7   1  209.20    6.41
  -2  -7  -1  202.66    6.49
  -2  -7   1  200.18    6.39
   2   7   1  203.36    6.45
  -2  -7   1  201.82    6.40
   2  -7  -1  197.32    6.41
  -2  -7   1  197.23    6.41
  -2   7  -1  197.55    6.39
  -2   7  -1  211.55    6.43
  -2   7  -1  187.46    6.37
   2  -7  -1  213.32    6.41
  -2   7  -1  208.31    6.71
   2   7   1  183.48    6.41
   2  -7  -1  206.13    6.39
   2  -7  -1  185.06    6.43
  -2  -7   1  186.27    6.43
   2   7   1  210.54    6.72
   2   7   1  221.76    6.51
  -2  -7   1  206.23    6.44
   2   7   1  211.41    6.35
   2   7   1  207.33    6.35
  -2   7  -1  216.62    6.40
  -2   7  -1  202.03    6.36
   2   7   1  205.44    6.37
   2   7   1  198.46    6.35
   2  -7  -1  197.55    6.38
  -2   7  -1  207.01    6.33
   2  -7  -1  198.15    6.30
  -2   7  -1  192.98    6.35
   3  -7   1  359.73   11.91
   3  -7   1  387.81   11.91
  -3  -7  -1  376.27   12.05
  -3   7   1  378.46   12.23
  -3   7   1  382.38   11.92
   3   7  -1  394.44   12.08
  -3  -7  -1  365.99   11.89
   3  -7   1  377.54   12.30
   3   7  -1  367.31   11.93
   3  -7   1  366.31   11.81
   3  -7   1  392.58   11.89
   3   7  -1  378.16   11.90
  -3   7   1  365.40   11.85
   3   7  -1  381.85   11.93
   3  -7   1  382.87   11.90
   3   7  -1  380.54   11.93
   3   7  -1  360.08   11.90
   3  -7   1  379.95   11.92
  -3   7   1  363.85   11.94
  -3  -7  -1  376.15   11.99
  -3   7   1  386.03   11.92
   3   7  -1  367.13   11.99
  -3  -7  -1  361.68   11.87
  -3  -7  -1  393.67   11.89
  -3   7   1  393.45   11.88
  -3   7   1  395.71   11.95
  -3  -7  -1  378.15   11.87
   3  -7   1  388.85   11.90
  -3  -7  -1  378.35   11.89
   3  -7  -1  387.30   11.94
   3  -7  -1  382.29   11.85
   3  -7  -1  363.19   11.91
   3  -7  -1  390.56   12.31
  -3  -7   1  393.31   12.00
   3   7   1  379.54   11.85
  -3   7  -1  354.89   11.95
  -3   7  -1  395.96   12.28
  -3   7  -1  379.88   11.92
  -3   7  -1  393.83   11.92
  -3  -7   1  383.62   11.93
   3   7   1  368.16   11.99
   3   7   1  402.06   11.83
  -3   7  -1  396.90   11.93
   3   7   1  390.04   11.87
   3   7   1  388.25   11.87
  -3   7  -1  368.51   11.89
   3   7   1  376.17   11.83
   3  -7  -1  374.66   11.94
   3  -7  -1  404.90   11.92
   3   7   1  375.54   11.89
  -3  -7   1  405.90   11.94
   3   7   1  379.55   11.89
   3  -7  -1  431.95   12.03
   3   7   1  405.23   12.06
  -3   7  -1  385.20   11.89
  -3  -7   1  394.03   11.90
  -3  -7   1  377.08   12.07
   3   7   1  404.02   12.00
   4  -7   1  399.98   11.70
  -4   7   1  380.89   11.67
  -4   7   1  361.15   11.62
   4   7  -1  377.44   11.74
  -4  -7  -1  367.42   11.72
   4   7  -1  370.74   11.71
  -4   7   1  364.46   11.67
   4  -7   1  375.68   11.72
   4  -7   1  382.39   11.73
  -4  -7  -1  385.30   11.68
   4  -7   1  373.87   11.69
  -4  -7  -1  367.85   11.66
  -4  -7  -1  361.18   11.66
  -4  -7  -1  368.83   11.66
  -4  -7  -1  371.70   11.88
   4   7  -1  371.96   11.74
  -4   7   1  400.77   11.76
   4   7  -1  361.30   11.81
   4  -7   1  353.03   11.71
  -4   7   1  366.09   11.72
  -4   7   1  381.86   11.72
  -4  -7  -1  380.31   11.82
  -4  -7  -1  371.10   11.68
   4  -7   1  355.45   12.11
   4   7  -1  392.86   11.71
  -4   7   1  380.39   12.10
   4   7  -1  370.71   11.75
   4   7  -1  392.42   11.92
  -4   7  -1  367.03   11.72
  -4   7  -1  382.85   12.14
   4   7   1  372.37   11.68
  -4  -7   1  371.84   11.72
   4  -7  -1  387.99   11.73
  -4   7  -1  368.66   11.69
   4  -7  -1  376.02   11.67
  -4  -7   1  387.83   11.74
   4   7   1  393.09   11.89
  -4   7  -1  375.33   11.72
  -4   7  -1  390.71   11.72
   4  -7  -1  357.02   11.92
   4  -7  -1  364.31   11.75
  -4  -7   1  359.48   11.89
  -4  -7   1  367.11   11.74
   4   7   1  386.24   11.66
   4   7   1  380.44   11.68
  -4  -7   1  378.46   11.71
  -4  -7   1  384.31   11.76
   4   7   1  380.98   11.80
   4   7   1  384.25   11.66
   4  -7  -1  391.51   11.85
  -4  -7   1  381.61   11.82
   4  -7  -1  369.33   12.13
  -4   7  -1  386.99   11.72
  -4   7  -1  377.92   11.69
   4   7   1  376.88   11.66
   4  -7  -1  380.22   11.86
   4   7   1  359.65   11.81
   5  -7   1  246.17    7.29
  -5   7   1  232.04    7.29
  -5  -7  -1  227.40    7.49
   5   7  -1  224.44    7.31
   5   7  -1  235.56    7.34
   5   7  -1  231.88    7.27
  -5   7   1  228.26    7.74
   5  -7   1  227.53    7.30
   5  -7   1  233.49    7.25
  -5  -7  -1  221.53    7.30
  -5   7   1  222.83    7.29
  -5   7   1  228.24    7.22
  -5  -7  -1  237.75    7.24
   5  -7   1  230.63    7.25
   5  -7   1  218.79    7.76
  -5   7   1  208.73    7.39
   5   7  -1  220.07    7.40
   5  -7   1  216.94    7.28
   5   7  -1  239.40    7.31
  -5  -7  -1  231.03    7.21
  -5  -7  -1  223.69    7.24
   5   7   1  236.50    7.21
  -5   7  -1  247.18    7.26
   5   7   1  237.24    7.22
   5  -7  -1  230.36    7.33
   5  -7  -1  233.36    7.32
   5  -7  -1  233.79    7.48
   5  -7  -1  246.15    7.52
   5   7   1  237.00    7.24
  -5   7  -1  233.12    7.26
  -5  -7   1  234.14    7.31
   5  -7  -1  216.61    7.31
   5   7   1  237.70    7.26
  -5   7  -1  233.71    7.32
   5   7   1  233.73    7.24
   5   7   1  228.90    7.41
  -5  -7   1  234.17    7.27
  -5  -7   1  236.42    7.23
   5   7   1  232.53    7.48
   5   7   1  235.18    7.38
   5  -7  -1  223.40    7.75
  -5   7  -1  230.34    7.25
   5   7   1  242.50    7.24
  -5  -7   1  227.36    7.29
  -5  -7   1  232.68    7.52
  -5   7  -1  238.35    7.29
  -5   7  -1  230.93    7.28
  -5   7  -1  229.35    7.31
  -5  -7   1  235.76    7.45
   6  -7   1   32.78    1.25
  -6  -7  -1   32.85    1.22
   6   7  -1   35.25    1.28
   6  -7   1   29.48    1.86
  -6  -7  -1   33.36    1.16
  -6   7   1   32.77    1.28
  -6   7   1   34.62    1.17
  -6  -7  -1   34.78    1.14
   6  -7   1   34.89    1.22
  -6  -7  -1   34.57    1.18
   6   7  -1   34.66    1.37
   6   7  -1   34.22    1.23
  -6   7   1   35.32    1.28
  -6   7   1   33.12    1.26
  -6   7   1   34.66    1.34
  -6  -7  -1   32.81    1.31
   6   7  -1   32.88    1.32
  -6  -7  -1   33.74    1.16
  -6  -7  -1   32.91    1.55
   6  -7   1   32.43    1.18
   6   7  -1   32.30    1.45
   6  -7  -1   33.92    1.30
   6   7   1   33.51    1.16
   6   7   1   32.71    1.20
  -6   7  -1   32.17    1.22
   6   7   1   32.39    1.13
  -6   7  -1   31.52    1.32
  -6  -7   1   32.34    1.23
  -6  -7   1   32.88    1.24
  -6  -7   1   31.95    1.57
   6  -7  -1   29.93    1.85
  -6   7  -1   31.70    1.19
   6  -7  -1   32.98    1.28
  -6   7  -1   33.45    1.21
  -6   7  -1   31.50    1.32
   6   7   1   33.93    1.20
   6   7   1   32.68    1.14
  -6  -7   1   29.92    1.47
   6   7   1   31.46    1.43
  -6  -7   1   31.89    1.27
  -6   7  -1   32.09    1.21
   6  -7  -1   30.37    1.32
  -6  -7   1   31.44    1.27
   7   7  -1  200.15    6.70
  -7  -7  -1  206.51    6.84
  -7   7   1  205.84    6.61
  -7  -7  -1  201.11    6.59
   7   7  -1  211.42    6.52
  -7   7   1  211.79    6.47
   7  -7   1  202.00    6.48
   7  -7   1  209.27    6.53
  -7   7   1  203.00    6.55
  -7  -7  -1  205.50    6.45
  -7   7   1  209.85    6.55
   7  -7   1  198.07    7.19
  -7   7   1  208.78    6.60
   7   7  -1  202.70    6.57
  -7  -7  -1  205.72    6.52
   7   7  -1  212.24    6.65
   7   7  -1  208.03    6.56
   7  -7   1  215.11    6.53
  -7   7   1  202.39    6.55
  -7   7  -1  213.15    6.50
   7   7   1  203.16    6.70
   7   7   1  209.71    6.47
   7  -7  -1  193.32    7.15
  -7  -7   1  200.32    6.84
  -7  -7   1  207.45    6.52
  -7  -7   1  209.47    6.51
   7  -7  -1  197.99    6.59
   7   7   1  203.33    6.44
   7  -7  -1  212.25    6.59
   7  -7  -1  213.72    6.55
  -7  -7   1  208.46    6.57
   7  -7  -1  209.98    6.46
  -7   7  -1  203.13    6.60
  -7  -7   1  201.02    6.54
   7   7   1  205.33    6.46
  -7   7  -1  204.33    6.49
  -7   7  -1  202.54    6.52
  -7   7  -1  205.17    6.47
  -7   7  -1  202.31    6.59
   8  -7   1   84.83    2.77
   8   7  -1   83.19    2.90
  -8  -7  -1   84.11    3.25
  -8   7   1   84.77    2.98
   8   7  -1   82.71    3.07
  -8   7   1   83.07    2.88
  -8   7   1   88.76    2.78
  -8   7   1   87.87    2.95
  -8   7   1   88.81    2.89
   8  -7   1   85.82    2.84
  -8  -7  -1   85.85    2.88
   8   7  -1   86.98    2.88
  -8  -7  -1   84.72    2.94
   8  -7   1   80.94    3.67
   8   7  -1   84.56    2.82
  -8  -7  -1   84.04    2.73
   8  -7   1   84.99    2.92
  -8   7   1   86.49    2.91
  -8  -7  -1   83.12    2.86
  -8  -7   1   84.06    3.25
   8  -7  -1   85.75    2.76
  -8   7  -1   82.24    2.79
   8  -7  -1   81.70    3.66
  -8  -7   1   85.03    2.96
   8  -7  -1   82.36    2.92
  -8   7  -1   85.56    2.95
  -8   7  -1   81.84    2.73
   8  -7  -1   88.07    2.91
  -8  -7   1   85.82    2.87
   8   7   1   83.10    3.05
   8   7   1   87.89    2.78
  -8  -7   1   86.32    2.86
  -8  -7   1   88.74    2.85
   8  -7  -1   86.73    2.88
  -8   7  -1   85.19    2.82
  -8  -7   1   84.93    2.87
   8   7   1   87.06    2.75
  -8   7  -1   75.52    2.86
   8   7   1   87.09    2.73
  -8   7  -1   84.41    2.95
   8   7   1   75.73    2.93
  -9  -7  -1   12.33    0.68
  -9   7   1   11.79    0.89
  -9   7   1   13.13    0.98
  -9  -7  -1   12.12    0.99
   9  -7   1   11.88    0.64
  -9   7   1   12.25    0.97
   9  -7   1   11.96    0.79
  -9  -7  -1   11.96    1.35
   9   7  -1   11.99    0.76
  -9  -7  -1   12.48    0.73
  -9   7   1   11.68    0.97
   9   7  -1   10.40    1.93
  -9   7   1   11.40    1.03
   9   7  -1   10.09    0.91
   9  -7   1   10.48    1.78
  -9  -7  -1   11.45    0.57
  -9  -7  -1   13.19    0.92
   9   7  -1   12.36    0.70
   9   7  -1   10.84    1.16
   9   7   1   12.98    0.73
   9  -7  -1   13.81    0.87
   9  -7  -1   11.77    1.86
  -9  -7   1   12.05    0.88
   9   7   1   12.68    0.58
   9  -7  -1   13.11    0.64
   9   7   1   12.78    1.10
  -9   7  -1   11.89    0.74
  -9   7  -1   12.43    1.00
  -9  -7   1   12.15    0.78
  -9  -7   1   13.34    0.91
   9   7   1   11.46    1.88
   9  -7  -1   12.08    0.93
   9   7   1   12.97    0.59
  -9  -7   1   13.05    0.99
  -9  -7   1   12.74    1.37
   9  -7  -1   12.43    0.86
  -9   7  -1   11.54    0.71
  -9   7  -1   13.69    1.01
 -10  -7  -1   10.67    1.73
 -10   7   1   10.98    1.03
  10   7  -1   12.07    1.20
 -10   7   1   10.49    1.20
 -10   7   1   11.26    1.14
 -10   7   1   11.26    1.05
 -10  -7  -1   10.56    0.97
  10   7  -1   10.52    2.97
  10   7  -1   11.69    0.93
 -10  -7  -1   11.47    0.66
 -10  -7  -1   10.64    1.15
  10   7  -1   11.03    0.67
  10  -7   1   10.14    0.79
  10  -7   1   12.42    2.01
 -10  -7   1   11.06    0.97
 -10   7  -1    9.75    0.76
  10  -7  -1    9.63    0.90
 -10   7  -1   10.08    1.07
 -10  -7   1   10.26    1.04
 -10  -7   1   11.04    0.74
  10   7   1   10.07    0.72
 -10  -7   1   10.67    0.89
 -10   7  -1   10.01    1.03
  10   7   1    9.59    1.08
  10   7   1   10.69    2.03
 -10  -7   1    9.93    1.44
  11  -7   1    7.65    0.80
 -11  -7  -1    8.04    1.09
 -11  -7  -1    6.25    0.96
  11   7  -1    7.75    1.76
 -11   7   1   10.54    1.17
  11  -7   1   10.60    2.17
 -11   7   1    7.36    0.95
 -11  -7  -1    8.14    0.84
  11   7  -1    8.92    1.25
 -11  -7  -1    7.30    0.64
  11   7  -1    6.74    0.75
 -11   7   1    6.52    1.03
 -11  -7   1    8.21    0.88
 -11   7  -1    7.78    0.87
 -11   7  -1    8.00    0.78
 -11  -7   1    9.57    1.09
  11   7   1    7.32    1.66
  11   7   1    7.02    0.69
 -11  -7   1    8.32    1.03
  11  -7  -1    9.44    0.95
 -11   7  -1    7.55    1.07
  11  -7  -1    9.74    2.25
 -11  -7   1    8.21    1.55
  11   7   1    8.40    1.24
  12  -7   1   32.30    2.93
 -12   7   1   32.67    1.68
  12  -7   1   30.22    1.34
 -12  -7  -1   31.36    1.31
  12   7  -1   29.82    1.84
 -12  -7  -1   29.88    1.68
  12   7  -1   29.10    3.15
 -12  -7  -1   30.76    1.61
 -12   7   1   27.35    1.73
 -12  -7  -1   30.02    2.25
 -12   7   1   29.87    1.50
  12   7  -1   28.84    1.51
  12   7   1   29.51    1.16
  12   7   1   29.08    1.77
  12  -7  -1   28.75    1.55
 -12   7  -1   26.53    1.68
 -12  -7   1   28.37    2.23
 -12   7  -1   27.38    1.33
  12  -7  -1   33.44    3.07
 -12  -7   1   31.35    1.69
  12   7   1   29.06    3.02
 -12  -7   1   29.52    1.63
 -12   7  -1   29.22    1.68
 -12  -7   1   31.33    1.46
  13   7  -1   84.57    3.44
 -13  -7  -1   83.10    3.29
 -13  -7  -1   86.33    3.90
 -13   7   1   85.08    3.25
 -13   7   1   79.56    3.32
  13   7  -1   81.40    3.07
 -13   7   1   83.26    3.05
 -13  -7  -1   83.99    3.18
  13  -7   1   83.67    4.53
  13  -7   1   85.03    2.93
  13   7  -1   87.79    4.93
  13   7   1   86.45    3.36
 -13  -7   1   83.72    3.20
  13  -7  -1   81.45    3.11
 -13  -7   1   85.72    3.90
 -13  -7   1   85.03    3.02
 -13   7  -1   81.74    3.28
 -13   7  -1   80.40    3.26
 -13   7  -1   83.15    2.91
  13   7   1   85.80    4.80
  13  -7  -1   90.73    4.68
 -14  -7  -1    2.87    1.01
 -14   7   1    3.46    0.79
  14   7  -1    4.72    1.15
 -14   7   1    5.55    1.02
  14   7  -1    2.49    0.76
  14  -7  -1    2.77    0.79
 -14  -7   1    3.00    0.81
 -14  -7   1    3.24    1.08
 -14   7  -1    2.91    1.18
   0   8  -1    4.25    0.45
   0  -8   1    4.03    0.42
   0   8   1    4.37    0.40
   0  -8  -1    4.92    0.39
   0   8  -1    3.84    0.44
   0   8   1    4.46    0.48
   0   8  -1    4.11    0.48
   0   8   1    4.63    0.64
   0  -8  -1    3.71    0.44
   0  -8  -1    4.32    0.42
   0   8  -1    4.09    0.29
   0   8   1    4.24    0.43
   0  -8  -1    5.39    0.64
   0   8   1    4.34    0.40
   0  -8   1    4.03    0.48
   0   8  -1    4.35    0.42
   0  -8  -1    4.40    0.43
   0   8   1    4.25    0.47
   0  -8   1    3.62    0.41
   0  -8   1    4.47    0.28
   0  -8   1    5.24    0.89
   0  -8   1    4.46    0.43
   0  -8  -1    4.71    0.44
   0  -8   1    3.14    0.41
   0   8  -1    5.06    0.44
   0  -8   1    3.94    0.45
  -1   8   1   40.45    1.49
   1   8  -1   41.06    1.43
   1  -8   1   41.12    1.50
   1  -8   1   41.99    1.43
   1  -8   1   40.92    1.47
   1   8  -1   44.16    1.47
  -1  -8  -1   41.74    1.56
   1   8  -1   40.16    1.49
  -1  -8  -1   40.62    1.42
   1  -8   1   42.08    1.37
  -1   8   1   43.44    1.46
  -1  -8  -1   41.24    1.44
   1  -8   1   40.38    1.45
   1   8  -1   39.90    1.43
   1  -8   1   43.23    1.67
   1  -8   1   41.96    1.41
  -1   8   1   38.48    1.42
  -1  -8  -1   42.44    1.42
  -1  -8  -1   42.89    1.31
   1   8  -1   41.44    1.45
  -1   8   1   44.34    1.92
   1  -8   1   41.57    1.42
  -1  -8  -1   40.25    1.43
  -1   8   1   41.31    1.43
  -1   8   1   40.47    1.44
   1   8   1   39.42    1.45
  -1   8  -1   41.11    1.46
   1   8   1   40.89    1.41
  -1   8  -1   40.50    1.42
  -1   8  -1   41.32    1.37
   1  -8  -1   40.24    1.45
   1  -8  -1   40.23    1.46
  -1   8  -1   42.49    1.43
   1   8   1   44.29    1.61
  -1  -8   1   40.57    1.31
   1  -8  -1   39.32    1.46
  -1   8  -1   43.02    1.92
  -1   8  -1   42.02    1.45
  -1  -8   1   41.77    1.48
   1   8   1   43.23    1.44
   1  -8  -1   43.70    1.61
  -1  -8   1   41.19    1.46
  -1  -8   1   38.84    1.46
   1   8   1   40.37    1.40
   1  -8  -1   41.31    1.32
   1  -8  -1   42.94    1.44
   1   8   1   36.85    1.55
  -1   8  -1   39.32    1.43
  -1  -8   1   41.25    1.43
  -1  -8   1   41.27    1.45
  -2  -8  -1  128.57    4.20
   2  -8   1  133.37    4.20
   2  -8   1  125.32    4.22
   2   8  -1  129.88    4.23
   2  -8   1  134.77    4.25
  -2   8   1  126.05    4.29
  -2  -8  -1  139.12    4.23
   2   8  -1  128.86    4.23
   2  -8   1  126.61    4.25
  -2  -8  -1  133.97    4.20
   2  -8   1  135.39    4.22
   2   8  -1  135.49    4.26
   2  -8   1  122.04    4.39
   2   8  -1  127.25    4.31
  -2  -8  -1  132.54    4.23
  -2   8   1  134.60    4.23
  -2   8   1  137.55    4.24
  -2   8   1  132.50    4.24
   2   8  -1  128.68    4.26
  -2   8   1  137.92    4.27
   2   8  -1  137.35    4.42
   2   8  -1  132.90    4.24
  -2   8   1  131.46    4.58
   2  -8   1  129.15    4.17
  -2   8  -1  132.17    4.60
  -2  -8   1  127.98    4.23
  -2   8  -1  137.49    4.29
  -2   8  -1  129.72    4.19
   2  -8  -1  140.16    4.28
  -2   8  -1  131.50    4.25
  -2   8  -1  133.07    4.22
   2   8   1  126.44    4.22
  -2  -8   1  121.02    4.23
  -2   8  -1  136.46    4.18
   2   8   1  135.26    4.32
  -2  -8   1  135.77    4.30
  -2  -8   1  136.75    4.41
  -2   8  -1  136.67    4.25
   2   8   1  133.12    4.20
  -2   8  -1  138.08    4.23
   2   8   1  135.81    4.23
   2   8   1  131.19    4.32
   2   8   1  142.95    4.39
   2  -8  -1  141.30    4.32
  -2  -8   1  136.67    4.26
   2   8   1  132.89    4.20
   2  -8  -1  130.00    4.14
  -2  -8   1  140.11    4.23
   2  -8  -1  132.68    4.24
   2  -8  -1  124.87    4.24
   2  -8  -1  132.89    4.27
  -2  -8   1  135.54    4.27
   3  -8   1   21.17    0.83
   3   8  -1   18.92    0.83
   3  -8   1   20.84    0.82
  -3  -8  -1   20.11    0.82
  -3  -8  -1   18.69    0.81
  -3   8   1   19.52    0.89
   3   8  -1   18.84    1.01
  -3   8   1   19.49    1.25
  -3   8   1   19.73    0.92
   3   8  -1   19.12    0.86
   3  -8   1   19.48    0.69
  -3   8   1   19.90    0.79
   3   8  -1   20.37    0.88
   3  -8   1   20.86    0.86
  -3   8   1   19.67    0.84
  -3   8   1   18.33    0.87
  -3  -8  -1   20.07    1.05
   3   8  -1   18.23    0.89
   3   8  -1   19.91    1.10
  -3  -8  -1   19.77    0.79
   3  -8   1   20.81    1.44
   3   8  -1   18.54    0.83
   3  -8   1   19.45    0.87
   3  -8   1   21.09    0.85
  -3   8   1   21.33    0.88
  -3  -8  -1   21.15    0.82
  -3  -8   1   21.93    0.88
  -3  -8   1   21.98    0.88
   3   8   1   20.36    0.99
  -3   8  -1   22.10    0.71
  -3  -8   1   21.72    0.85
   3   8   1   22.31    0.75
  -3   8  -1   20.18    0.84
  -3   8  -1   22.56    0.86
  -3   8  -1   22.01    0.84
   3  -8  -1   21.02    0.92
  -3  -8   1   20.61    0.95
   3   8   1   21.27    0.84
   3  -8  -1   23.01    1.49
   3   8   1   21.02    0.95
  -3  -8   1   20.63    0.88
  -3  -8   1   21.71    0.89
  -3   8  -1   22.01    0.91
  -3   8  -1   20.30    0.93
   3  -8  -1   21.48    0.88
   3   8   1   22.67    0.80
  -3   8  -1   20.75    1.30
   3   8   1   22.07    0.82
   3  -8  -1   20.17    0.76
   3   8   1   21.48    1.05
   3  -8  -1   21.37    0.90
   3   8   1   21.70    0.79
  -3  -8   1   21.00    1.09
   3  -8  -1   20.32    0.89
  -3   8  -1   22.16    0.87
  -4   8   1  111.15    4.04
  -4  -8  -1  111.37    3.55
   4   8  -1  109.88    3.73
   4   8  -1  112.43    3.82
  -4   8   1  111.66    3.65
   4  -8   1  111.66    3.58
   4  -8   1  110.90    4.12
  -4  -8  -1  114.78    3.55
   4   8  -1  113.49    3.63
   4   8  -1  111.01    3.59
  -4   8   1  111.70    3.54
   4  -8   1  114.59    3.61
  -4  -8  -1  111.48    3.53
   4   8  -1  115.70    3.63
  -4   8   1  110.57    3.64
  -4  -8  -1  111.37    3.57
  -4  -8  -1  110.47    3.71
  -4   8   1  117.50    3.62
   4  -8   1  115.26    3.58
  -4   8   1  117.60    3.56
   4  -8   1  114.90    3.62
   4   8  -1  109.77    3.64
  -4  -8  -1  112.98    3.80
  -4   8   1  113.49    3.52
  -4  -8  -1  113.21    3.57
   4   8  -1  110.44    3.59
   4  -8   1  117.40    3.61
  -4  -8  -1  111.78    3.60
  -4   8   1  105.77    3.61
   4  -8  -1  115.56    3.65
  -4   8  -1  113.59    3.58
   4   8   1  114.53    3.83
   4  -8  -1  113.43    4.12
  -4   8  -1  109.41    3.61
   4   8   1  116.35    3.57
   4   8   1  112.27    3.53
   4   8   1  112.44    3.52
   4   8   1  104.71    3.71
   4   8   1  112.91    3.54
  -4  -8   1  106.20    3.62
   4  -8  -1  106.81    3.64
   4   8   1  114.24    3.54
  -4  -8   1  113.06    3.59
   4   8   1  111.88    3.58
  -4   8  -1  110.62    3.61
  -4  -8   1  109.38    3.63
   4   8   1  110.33    3.52
  -4  -8   1  109.59    3.51
   4  -8  -1  112.99    3.61
  -4  -8   1  108.57    3.60
  -4   8  -1  104.70    3.57
   4   8   1  107.71    3.69
  -4  -8   1  109.08    3.82
  -4   8  -1  117.92    3.62
  -4  -8   1  111.66    3.62
  -4   8  -1  105.55    3.60
   4  -8  -1  106.61    3.73
   4  -8  -1  112.29    3.55
  -4   8  -1  108.31    4.05
  -4  -8   1  108.22    3.87
   4  -8  -1  109.87    3.61
  -5   8   1  388.76   13.50
  -5  -8  -1  428.94   13.50
   5   8  -1  429.52   13.52
   5  -8   1  413.71   13.98
   5  -8   1  436.97   13.50
  -5  -8  -1  456.46   13.45
  -5  -8  -1  423.27   13.43
   5   8  -1  376.06   13.52
  -5   8   1  442.51   13.54
  -5  -8  -1  419.68   13.70
   5  -8   1  428.36   13.46
   5   8  -1  441.00   13.49
  -5   8   1  426.34   13.50
   5  -8   1  461.77   13.50
   5  -8   1  426.14   13.49
  -5  -8  -1  431.46   13.43
  -5   8   1  440.02   13.42
   5   8  -1  421.83   13.62
  -5  -8  -1  423.92   13.43
   5   8  -1  453.08   13.52
  -5   8   1  464.56   13.51
  -5  -8   1  432.38   13.48
   5   8   1  425.57   13.62
  -5   8  -1  433.83   13.47
  -5   8  -1  430.83   13.50
   5   8   1  451.96   13.45
  -5   8  -1  434.33   13.47
  -5   8  -1  446.30   13.47
   5   8   1  446.14   13.42
   5   8   1  443.62   13.43
  -5  -8   1  427.76   13.53
   5  -8  -1  455.32   13.54
  -5  -8   1  420.92   13.49
  -5   8  -1  425.11   13.51
   5  -8  -1  417.54   13.53
   5   8   1  430.04   13.45
   5   8   1  439.88   13.45
  -5  -8   1  443.64   13.52
   5  -8  -1  427.54   14.00
   5   8   1  442.08   13.43
  -5  -8   1  419.19   13.71
   5  -8  -1  446.35   13.46
   5  -8  -1  435.00   13.50
  -5  -8   1  430.44   13.42
  -6  -8  -1   74.87    2.29
   6   8  -1   68.26    2.30
  -6   8   1   63.32    2.30
  -6   8   1   66.62    2.18
   6   8  -1   67.77    2.35
  -6  -8  -1   65.00    2.32
  -6  -8  -1   67.87    2.18
  -6  -8  -1   66.74    2.20
   6  -8   1   61.16    2.90
   6   8  -1   69.00    2.26
   6   8  -1   64.05    2.46
   6   8  -1   64.15    2.32
  -6   8   1   67.52    2.27
  -6  -8  -1   65.29    2.23
   6  -8   1   66.16    2.29
  -6  -8  -1   67.67    2.21
   6  -8   1   67.92    2.27
   6  -8   1   67.30    2.23
  -6   8   1   64.89    2.29
  -6  -8  -1   65.82    2.57
  -6   8   1   65.17    2.35
  -6   8  -1   68.23    2.25
  -6   8  -1   65.78    2.23
  -6   8  -1   69.37    2.35
   6  -8  -1   62.17    2.89
  -6  -8   1   69.09    2.27
  -6  -8   1   69.77    2.31
   6  -8  -1   67.60    2.33
  -6   8  -1   66.27    2.27
   6   8   1   77.85    2.34
   6   8   1   64.20    2.46
   6   8   1   66.96    2.24
  -6   8  -1   65.15    2.33
   6  -8  -1   64.82    2.34
   6   8   1   68.65    2.19
   6  -8  -1   66.31    2.30
  -6  -8   1   64.94    2.59
  -6   8  -1   71.22    2.25
   6   8   1   68.72    2.21
  -6  -8   1   63.72    2.44
   6   8   1   66.97    2.27
  -6  -8   1   66.83    2.30
  -7   8   1  101.08    3.49
   7  -8   1  105.10    3.48
   7  -8   1  102.73    3.41
  -7   8   1  103.08    3.54
   7   8  -1  106.36    3.46
  -7   8   1  107.30    3.37
  -7   8   1  103.37    3.56
  -7  -8  -1  104.38    3.44
  -7  -8  -1  108.44    3.40
  -7   8   1  106.94    3.49
  -7  -8  -1  106.17    3.82
   7   8  -1  107.57    3.59
   7  -8   1  101.98    4.20
   7   8  -1  100.03    3.67
   7  -8   1  110.22    3.47
   7   8  -1  104.38    3.49
   7   8  -1  102.58    3.52
  -7   8   1  109.26    3.50
  -7  -8  -1  107.74    3.37
  -7  -8  -1  105.96    3.39
  -7  -8  -1  104.16    3.54
   7  -8  -1  103.99    3.54
  -7  -8   1  104.65    3.48
  -7   8  -1  104.44    3.55
   7  -8  -1   97.70    4.16
  -7  -8   1  104.52    3.46
  -7  -8   1  106.62    3.50
   7   8   1  102.48    3.50
   7   8   1  105.54    3.67
   7  -8  -1  108.94    3.53
  -7   8  -1  104.02    3.39
   7  -8  -1  108.64    3.49
   7   8   1  109.73    3.42
  -7   8  -1  108.37    3.44
  -7  -8   1  108.01    3.84
   7   8   1  106.08    3.37
  -7   8  -1  102.68    3.43
  -7   8  -1  103.78    3.46
  -7   8  -1  109.02    3.61
   7   8   1  108.78    3.40
  -7  -8   1  107.77    3.43
  -8  -8  -1   61.49    2.22
  -8   8   1   64.44    2.28
  -8   8   1   66.08    2.32
  -8   8   1   64.75    2.28
   8   8  -1   63.98    2.20
   8  -8   1   62.04    3.10
   8  -8   1   61.58    2.23
  -8   8   1   64.29    2.11
  -8   8   1   62.83    2.36
   8  -8   1   64.06    2.16
  -8   8   1   63.09    2.33
  -8  -8  -1   63.88    2.13
   8   8  -1   61.38    2.30
   8  -8   1   67.16    2.22
   8   8  -1   63.56    2.25
  -8  -8  -1   63.67    2.64
   8   8  -1   62.43    2.49
  -8  -8  -1   61.14    2.32
  -8   8  -1   67.63    2.22
   8   8   1   62.71    2.46
   8   8   1   59.32    2.31
   8  -8  -1   60.11    3.07
  -8  -8   1   66.24    2.70
  -8   8  -1   63.84    2.10
  -8   8  -1   64.94    2.35
  -8  -8   1   65.14    2.23
   8  -8  -1   64.78    2.29
   8  -8  -1   63.01    2.25
  -8   8  -1   64.11    2.34
  -8  -8   1   63.74    2.25
  -8  -8   1   63.78    2.22
   8   8   1   66.46    2.17
  -8   8  -1   61.40    2.18
   8   8   1   65.37    2.13
  -8   8  -1   67.06    2.19
   8  -8  -1   63.20    2.32
   8   8   1   64.59    2.11
  -8  -8   1   65.82    2.25
   9   8  -1   73.08    2.91
  -9  -8  -1   71.02    2.62
   9  -8   1   75.41    2.64
  -9   8   1   79.59    2.69
  -9   8   1   76.67    2.76
  -9  -8  -1   75.53    2.66
  -9  -8  -1   79.57    2.54
   9  -8   1   75.43    2.56
   9   8  -1   75.50    2.70
  -9   8   1   75.33    2.80
   9   8  -1   76.70    2.61
  -9  -8  -1   75.16    3.11
   9  -8   1   75.22    3.64
  -9  -8  -1   77.83    2.78
  -9   8   1   77.50    2.73
  -9   8  -1   75.10    2.60
  -9   8  -1   77.28    2.77
   9   8   1   77.64    2.57
   9   8   1   77.24    2.50
  -9  -8   1   77.64    2.79
   9  -8  -1   80.67    3.66
   9   8   1   78.48    2.52
  -9   8  -1   75.61    2.77
  -9  -8   1   80.41    2.70
  -9  -8   1   79.71    3.16
   9  -8  -1   77.45    2.68
  -9  -8   1   79.00    2.67
   9   8   1   75.79    2.89
  -9   8  -1   75.97    2.61
   9  -8  -1   74.83    2.72
   9  -8  -1   77.71    2.75
  -9  -8   1   77.32    2.67
  10  -8   1   -0.43    0.40
  10  -8   1    0.41    1.18
  10   8  -1   -0.15    0.56
 -10  -8  -1   -0.03    0.34
  10   8  -1   -0.93    1.33
 -10  -8  -1    0.34    0.57
  10   8  -1    1.07    0.80
 -10   8   1    0.07    0.64
 -10   8   1   -0.22    0.60
 -10   8   1   -0.21    0.51
  10   8  -1   -0.22    0.33
 -10  -8  -1    0.00    0.63
 -10   8   1    0.10    0.58
 -10  -8  -1    0.67    0.71
  10   8   1    0.19    1.32
 -10  -8   1   -0.07    0.49
  10  -8  -1   -0.30    0.51
  10  -8  -1   -0.18    0.53
  10   8   1    0.78    0.68
 -10  -8   1    0.57    0.64
 -10   8  -1   -0.40    0.59
 -10   8  -1   -0.11    0.74
  10  -8  -1    0.30    1.28
 -10   8  -1    0.02    0.40
 -10  -8   1    0.48    0.57
  10   8   1    0.38    0.40
 -10  -8   1    0.54    0.62
  11   8  -1   21.66    2.61
 -11   8   1   22.67    1.28
 -11  -8  -1   23.06    0.99
  11  -8   1   24.43    2.57
 -11   8   1   23.78    1.48
 -11  -8  -1   21.61    1.89
  11   8  -1   21.98    1.59
  11  -8   1   22.72    1.16
  11   8  -1   22.38    1.29
 -11  -8  -1   23.86    1.35
 -11  -8  -1   23.44    1.43
 -11   8   1   21.38    1.51
 -11   8  -1   22.01    1.42
  11  -8  -1   23.13    1.32
 -11   8  -1   20.98    1.40
 -11  -8   1   22.54    1.87
 -11   8  -1   22.40    1.27
 -11  -8   1   21.50    1.39
  11   8   1   22.35    2.57
  11   8   1   21.97    1.51
  11   8   1   22.96    1.03
 -11  -8   1   22.45    1.22
  11  -8  -1   25.33    2.63
 -11  -8   1   23.76    1.39
 -12   8   1   23.60    1.51
 -12  -8  -1   23.90    2.08
  12   8  -1   20.12    1.30
 -12   8   1   21.27    1.60
  12   8  -1   20.61    3.01
 -12  -8  -1   20.86    1.54
  12  -8   1   20.77    1.19
 -12   8   1   20.68    1.36
  12  -8   1   25.48    2.80
  12   8  -1   23.86    1.71
 -12  -8  -1   20.65    1.46
 -12  -8   1   19.05    2.05
 -12  -8   1   22.39    1.48
 -12   8  -1   21.51    1.54
  12   8   1   21.59    1.00
  12   8   1   21.95    1.64
 -12   8  -1   22.54    1.54
 -12   8  -1   23.54    1.21
 -12  -8   1   21.63    1.29
 -12  -8   1   21.73    1.56
  12   8   1   21.24    2.93
  12  -8  -1   26.85    2.94
  12  -8  -1   23.27    1.38
 -13  -8  -1   20.32    1.64
  13  -8   1   23.51    3.03
  13   8  -1   19.52    3.30
 -13  -8  -1   19.32    2.21
 -13   8   1   16.83    1.34
  13   8  -1   15.49    1.33
 -13   8   1   17.64    1.65
 -13  -8  -1   17.53    1.50
  13   8  -1   19.66    1.80
 -13   8   1   20.82    1.60
  13  -8   1   18.42    1.16
 -13   8  -1   15.76    1.59
 -13  -8   1   17.94    1.46
  13   8   1   17.53    3.15
 -13   8  -1   15.88    1.55
  13   8   1   17.72    1.71
 -13   8  -1   15.80    1.19
 -13  -8   1   17.69    2.16
 -13  -8   1   18.83    1.54
 -13  -8   1   16.24    1.30
  13  -8  -1   15.27    1.34
  14   8  -1   15.29    1.32
  14   8  -1   15.78    1.74
 -14   8   1   14.00    1.24
 -14   8   1   17.62    1.57
  14  -8  -1   13.49    1.28
 -14  -8   1   12.29    1.25
  14   8   1   20.04    1.74
   0   9   1   25.42    1.16
   0  -9  -1   25.58    0.96
   0  -9   1   25.21    0.84
   0  -9  -1   25.12    0.99
   0   9  -1   24.83    0.97
   0   9   1   25.11    0.95
   0   9  -1   25.04    1.04
   0  -9   1   24.10    1.00
   0   9  -1   24.19    0.99
   0  -9  -1   25.68    0.98
   0   9   1   23.96    0.94
   0  -9   1   23.31    0.99
   0  -9   1   23.71    1.01
   0  -9   1   24.71    0.97
   0  -9   1   25.65    0.98
   0  -9   1   25.64    1.20
   0   9   1   23.28    1.00
   0   9  -1   25.36    1.21
   0   9   1   24.36    1.01
   0  -9  -1   23.52    0.96
   0   9  -1   23.97    0.98
   0  -9  -1   26.38    0.93
   0   9  -1   24.71    0.84
   1  -9   1   28.64    1.13
  -1   9   1   29.08    1.15
   1  -9   1   29.55    1.15
  -1   9   1   31.53    1.68
   1   9  -1   29.37    1.39
  -1  -9  -1   27.62    1.13
   1  -9   1   30.24    1.12
   1   9  -1   29.62    1.14
  -1  -9  -1   30.11    1.12
   1   9  -1   27.78    1.15
   1  -9   1   27.08    1.19
  -1   9   1   27.97    1.12
   1   9  -1   28.24    1.18
   1  -9   1   27.30    1.17
   1  -9   1   29.70    1.05
  -1  -9  -1   29.53    0.99
  -1  -9  -1   28.66    1.33
   1  -9   1   32.01    1.41
  -1  -9  -1   29.47    1.12
  -1   9   1   27.66    1.17
  -1   9   1   27.51    1.14
   1  -9   1   28.65    1.10
   1   9  -1   27.51    1.12
   1   9  -1   29.22    1.16
  -1  -9  -1   31.53    1.15
  -1   9  -1   33.43    1.06
   1  -9  -1   34.61    1.15
   1   9   1   31.72    1.16
   1  -9  -1   33.64    1.15
  -1  -9   1   32.43    1.15
   1   9   1   33.35    1.15
   1   9   1   32.15    1.11
  -1   9  -1   32.36    1.18
  -1  -9   1   34.34    1.15
  -1  -9   1   30.61    1.21
   1   9   1   34.23    1.36
  -1   9  -1   31.83    1.15
   1  -9  -1   28.23    1.17
  -1   9  -1   32.48    1.14
   1  -9  -1   33.46    1.17
   1   9   1   32.14    1.23
  -1   9  -1   33.80    1.72
  -1  -9   1   32.46    0.98
  -1  -9   1   32.01    1.16
  -1   9  -1   32.04    1.13
   1  -9  -1   33.52    1.40
   1   9   1   31.17    1.11
  -1  -9   1   30.92    1.16
  -1  -9   1   31.86    1.18
  -2  -9  -1   98.98    3.32
  -2   9   1  103.30    3.33
   2  -9   1  100.77    3.35
   2  -9   1  104.58    3.54
   2  -9   1   97.53    3.44
   2  -9   1  100.55    3.26
  -2  -9  -1  103.07    3.30
  -2   9   1  105.88    3.36
   2   9  -1  105.87    3.32
   2   9  -1  103.41    3.36
  -2   9   1  102.06    3.33
   2  -9   1  105.35    3.31
   2  -9   1  102.99    3.32
   2   9  -1   99.91    3.41
   2   9  -1  109.79    3.36
   2   9  -1  103.54    3.32
  -2  -9  -1  103.45    3.32
  -2  -9  -1  105.33    3.48
  -2  -9  -1  108.81    3.30
  -2   9   1  104.01    3.73
   2  -9   1  109.38    3.35
  -2   9   1  100.47    3.30
   2   9   1  106.78    3.32
   2   9   1   98.19    3.29
   2  -9  -1   98.76    3.23
  -2   9  -1  102.56    3.49
  -2   9  -1   99.09    3.27
   2  -9  -1  110.08    3.41
   2  -9  -1   99.16    3.33
  -2  -9   1   97.64    3.33
   2  -9  -1  105.70    3.36
  -2   9  -1  102.45    3.27
  -2  -9   1  101.13    3.32
  -2   9  -1  100.26    3.35
   2  -9  -1  102.15    3.50
  -2  -9   1  105.52    3.33
   2   9   1  106.96    3.49
  -2  -9   1  102.16    3.35
  -2   9  -1   95.78    3.31
   2   9   1   99.59    3.32
  -2  -9   1  103.86    3.52
  -2   9  -1  102.53    3.31
   2   9   1  100.15    3.29
  -2   9  -1  100.29    3.72
   2  -9  -1  108.73    3.34
   2   9   1   99.49    3.41
  -2   9  -1  101.92    3.34
  -3  -9  -1  607.22   19.45
   3  -9   1  593.01   19.50
  -3   9   1  613.10   19.44
  -3   9   1  644.53   19.49
  -3   9   1  626.53   19.52
   3  -9   1  638.57   19.42
   3   9  -1  628.25   19.48
  -3  -9  -1  622.92   19.48
  -3  -9  -1  639.03   19.45
   3  -9   1  652.61   19.51
  -3  -9  -1  620.23   19.65
   3   9  -1  629.82   19.51
   3  -9   1  645.11   19.48
  -3  -9  -1  653.77   19.48
   3   9  -1  565.68   19.51
  -3   9   1  635.19   19.46
   3   9  -1  592.68   19.51
  -3   9   1  611.64   19.49
  -3  -9  -1  625.59   19.58
   3  -9   1  633.90   19.47
   3   9  -1  650.90   19.48
  -3   9   1  624.62   19.54
   3   9  -1  604.37   19.58
  -3   9   1  635.80   19.90
   3  -9   1  628.06   19.48
   3   9  -1  645.91   19.69
  -3   9  -1  643.23   19.52
   3  -9  -1  671.10   19.50
  -3  -9   1  642.25   19.49
   3  -9  -1  625.79   19.41
   3  -9  -1  653.83   19.58
   3  -9  -1  610.99   19.49
   3   9   1  591.63   19.57
  -3   9  -1  646.28   19.39
  -3   9  -1  628.42   19.47
  -3   9  -1  631.54   19.47
  -3  -9   1  631.50   19.48
   3  -9  -1  607.22   19.52
   3   9   1  616.28   19.48
  -3  -9   1  615.19   19.54
  -3  -9   1  654.50   19.52
  -3   9  -1  631.27   19.51
   3   9   1  635.98   19.40
   3   9   1  635.22   19.48
  -3  -9   1  597.12   19.66
   3   9   1  648.34   19.45
   3  -9  -1  657.39   19.53
  -3  -9   1  631.37   19.58
  -3   9  -1  621.97   19.89
  -3  -9   1  605.31   19.48
  -3   9  -1  595.42   19.47
  -3   9  -1  633.34   19.50
   3   9   1  610.57   19.45
   3   9   1  669.60   19.67
   4   9  -1   49.65    1.73
  -4  -9  -1   49.54    1.93
   4  -9   1   49.29    1.70
   4   9  -1   46.51    1.85
   4   9  -1   46.27    1.74
  -4  -9  -1   50.74    1.67
  -4   9   1   47.73    1.63
  -4  -9  -1   48.16    1.69
  -4   9   1   52.38    1.72
  -4   9   1   50.35    1.61
   4   9  -1   50.04    1.71
  -4  -9  -1   47.91    1.66
  -4   9   1   45.84    1.71
  -4   9   1   47.55    2.16
  -4  -9  -1   48.14    1.64
   4  -9   1   49.06    1.70
   4  -9   1   47.11    1.72
   4  -9   1   50.03    2.33
  -4   9   1   46.14    1.75
   4  -9   1   48.37    1.66
  -4  -9  -1   48.19    1.64
   4   9  -1   50.09    1.69
   4   9   1   49.19    1.92
  -4  -9   1   47.09    1.95
   4   9   1   45.01    1.54
   4  -9  -1   48.58    1.74
   4  -9  -1   48.19    1.76
  -4   9  -1   50.43    1.72
  -4  -9   1   48.23    1.69
   4   9   1   48.52    1.67
   4  -9  -1   49.39    1.62
   4   9   1   45.34    1.83
   4   9   1   46.73    1.67
  -4   9  -1   48.79    1.71
  -4  -9   1   49.03    1.71
  -4   9  -1   48.38    1.70
   4   9   1   47.07    1.63
   4   9   1   47.22    1.62
  -4   9  -1   50.95    1.68
  -4   9  -1   48.12    1.68
   4  -9  -1   46.36    1.71
   4  -9  -1   48.88    1.86
   4  -9  -1   48.64    2.32
   4   9   1   48.94    1.55
   4   9   1   47.51    1.59
  -4  -9   1   46.63    1.56
  -5  -9  -1  248.55    8.04
   5   9  -1  257.42    8.10
  -5  -9  -1  257.38    8.07
  -5   9   1  245.03    8.10
   5  -9   1  255.53    8.08
  -5  -9  -1  245.50    8.02
  -5   9   1  265.46    8.12
  -5  -9  -1  287.73    8.16
  -5  -9  -1  250.29    8.11
   5  -9   1  266.15    8.12
  -5   9   1  241.85    8.02
   5  -9   1  251.66    8.12
   5   9  -1  245.28    8.24
   5  -9   1  246.80    8.67
  -5   9   1  263.80    8.17
  -5   9   1  259.59    7.98
  -5  -9  -1  254.10    8.33
  -5  -9  -1  262.86    8.04
   5   9  -1  255.04    8.13
  -5   9   1  245.85    8.11
   5  -9   1  280.06    8.20
   5   9  -1  270.18    8.14
   5   9  -1  250.28    8.13
   5   9   1  264.67    8.04
  -5  -9   1  256.05    8.36
   5   9   1  257.93    8.07
  -5   9  -1  245.51    8.08
   5   9   1  283.98    8.11
  -5   9  -1  255.03    8.12
   5   9   1  243.84    8.06
   5   9   1  249.42    8.24
   5  -9  -1  264.65    8.12
   5  -9  -1  245.56    8.15
   5  -9  -1  261.24    8.06
   5  -9  -1  262.64    8.15
   5   9   1  248.17    8.07
  -5   9  -1  270.51    8.09
  -5  -9   1  249.28    8.13
  -5   9  -1  266.95    8.10
   5   9   1  262.26    8.03
  -5   9  -1  255.85    8.12
  -5  -9   1  265.67    8.13
  -5  -9   1  246.20    8.10
  -5  -9   1  252.39    8.01
  -5  -9   1  259.04    8.09
   5  -9  -1  260.97    8.69
  -6  -9  -1  175.33    5.40
   6   9  -1  170.61    5.53
   6  -9   1  173.00    5.49
  -6   9   1  175.45    5.46
   6   9  -1  170.93    5.50
  -6  -9  -1  172.99    5.43
  -6   9   1  164.46    5.49
  -6  -9  -1  173.65    5.42
   6  -9   1  171.88    5.44
   6   9  -1  174.23    5.51
  -6  -9  -1  173.56    5.52
  -6   9   1  172.57    5.55
  -6   9   1  151.00    5.48
   6   9  -1  165.41    5.65
   6  -9   1  164.85    6.11
  -6   9   1  173.15    5.50
   6  -9   1  184.18    5.50
  -6  -9  -1  170.81    5.41
  -6  -9  -1  170.99    5.76
  -6   9  -1  173.03    5.44
   6  -9  -1  164.64    6.12
  -6  -9   1  169.82    5.40
   6  -9  -1  174.82    5.54
   6   9   1  163.89    5.43
   6   9   1  173.21    5.44
  -6  -9   1  171.70    5.49
  -6   9  -1  169.49    5.48
  -6   9  -1  185.98    5.47
   6   9   1  172.70    5.40
  -6   9  -1  172.90    5.53
   6  -9  -1  166.35    5.54
   6  -9  -1  175.76    5.50
   6   9   1  167.40    5.69
  -6  -9   1  174.76    5.47
  -6  -9   1  170.62    5.79
  -6  -9   1  169.26    5.54
  -6   9  -1  167.88    5.46
   6   9   1  177.83    5.43
  -7  -9  -1  194.62    6.28
   7  -9   1  184.54    6.93
  -7  -9  -1  198.57    6.15
   7  -9   1  190.43    6.23
   7   9  -1  197.40    6.25
  -7  -9  -1  196.41    6.16
   7   9  -1  191.69    6.26
  -7   9   1  197.39    6.22
   7  -9   1  204.46    6.23
  -7   9   1  195.04    6.30
  -7   9   1  194.28    6.29
   7   9  -1  193.89    6.30
  -7  -9  -1  196.15    6.13
  -7  -9  -1  189.54    6.53
   7  -9   1  193.13    6.17
  -7   9   1  187.63    6.23
   7   9  -1  190.22    6.33
  -7   9   1  200.65    6.24
   7   9  -1  186.59    6.41
  -7  -9  -1  193.48    6.17
  -7  -9   1  195.21    6.22
   7   9   1  190.51    6.41
  -7   9  -1  202.59    6.30
  -7   9  -1  195.54    6.22
   7   9   1  200.84    6.16
   7  -9  -1  200.31    6.29
   7   9   1  199.72    6.17
  -7  -9   1  195.51    6.15
  -7  -9   1  193.51    6.57
   7  -9  -1  198.98    6.24
   7  -9  -1  188.46    6.28
   7  -9  -1  186.59    6.91
  -7  -9   1  185.27    6.33
  -7   9  -1  191.13    6.19
  -7  -9   1  204.59    6.21
  -7   9  -1  194.30    6.14
  -7   9  -1  203.40    6.19
   7   9   1  198.23    6.13
  -7   9  -1  196.72    6.29
   7   9   1  195.25    6.22
   8  -9   1    6.21    1.32
  -8  -9  -1    7.18    0.47
  -8   9   1    6.40    0.87
   8  -9   1    5.51    0.51
   8  -9   1    6.75    0.72
  -8  -9  -1    5.91    0.83
   8   9  -1    6.28    0.69
  -8  -9  -1    6.83    0.57
  -8   9   1    6.55    0.78
   8   9  -1    5.63    0.83
   8   9  -1    6.61    0.90
  -8  -9  -1    6.15    0.54
  -8   9   1    6.34    0.69
  -8   9   1    7.40    0.80
   8  -9   1    6.68    0.64
  -8  -9  -1    5.91    0.69
  -8  -9  -1    6.32    1.15
  -8   9   1    6.53    0.77
  -8  -9   1    6.56    0.71
   8   9   1    6.05    0.65
  -8   9  -1    6.46    0.60
   8   9   1    6.08    0.78
   8   9   1    6.77    0.99
  -8   9  -1    6.15    0.66
  -8  -9   1    6.63    0.76
  -8   9  -1    5.75    0.45
  -8  -9   1    7.30    0.70
  -8  -9   1    4.38    0.71
   8  -9  -1    8.07    0.78
   8   9   1    6.49    0.50
   8  -9  -1    6.74    0.82
   8  -9  -1    6.07    1.29
  -8   9  -1    7.28    0.66
  -8  -9   1    5.89    0.76
   8   9   1    6.68    0.50
  -8   9  -1    5.91    0.67
  -8   9  -1    6.61    0.89
   8  -9  -1    6.78    0.74
  -9  -9  -1   41.62    1.63
  -9   9   1   42.49    1.81
  -9   9   1   41.09    1.68
   9  -9   1   38.91    1.62
   9   9  -1   40.62    1.69
  -9   9   1   41.21    1.70
  -9  -9  -1   41.50    1.50
  -9   9   1   43.86    1.81
   9   9  -1   41.88    1.96
  -9  -9  -1   40.89    1.75
   9  -9   1   42.42    1.50
   9  -9   1   39.59    2.63
  -9  -9  -1   41.42    2.15
  -9  -9   1   43.04    1.81
  -9  -9   1   40.49    2.16
   9  -9  -1   40.11    1.73
  -9  -9   1   41.75    1.65
  -9   9  -1   40.99    1.58
   9   9   1   40.90    1.54
   9  -9  -1   42.73    1.68
   9  -9  -1   40.78    2.64
  -9   9  -1   41.12    1.77
  -9   9  -1   40.36    1.77
  -9  -9   1   41.81    1.62
   9   9   1   40.01    1.89
  -9   9  -1   41.94    1.58
 -10  -9  -1    4.75    0.84
 -10  -9  -1    6.15    0.79
  10   9  -1    6.47    0.88
 -10   9   1    7.65    0.91
 -10   9   1    5.99    0.82
  10  -9   1    6.84    1.56
 -10   9   1    8.25    0.89
  10   9  -1    6.20    0.97
 -10  -9  -1    5.57    0.62
 -10  -9  -1    7.26    0.91
  10  -9   1    5.73    0.79
 -10   9   1    7.21    0.96
 -10  -9   1    5.80    0.89
 -10  -9   1    7.25    0.99
 -10  -9   1    7.76    0.97
  10  -9  -1    8.35    2.00
 -10   9  -1    5.71    0.75
  10  -9  -1    5.89    0.73
  10   9   1    6.40    1.66
  10   9   1    5.91    0.70
  10  -9  -1    7.01    0.94
 -10   9  -1    6.73    0.83
  11   9  -1    6.87    0.97
 -11  -9  -1    5.64    0.98
 -11  -9  -1    8.47    1.06
 -11   9   1    8.01    0.93
  11  -9   1   10.56    2.22
  11  -9   1    7.17    0.85
  11   9  -1    7.09    1.80
 -11  -9  -1    6.99    0.88
 -11  -9  -1    6.87    0.70
 -11   9   1    7.23    0.77
 -11   9   1    5.24    0.93
  11   9  -1    8.21    1.35
  11   9   1    6.26    0.76
 -11   9  -1    8.09    0.93
 -11   9  -1    7.79    0.94
 -11  -9   1    8.75    0.98
 -11  -9   1    6.89    0.71
 -11  -9   1    7.26    0.86
  11   9   1    9.03    2.34
  11  -9  -1    6.84    0.80
 -11  -9   1    4.64    0.91
  11   9   1    8.78    1.25
 -11   9  -1    6.09    0.82
  11  -9  -1    8.72    2.24
 -12  -9  -1    5.25    1.07
 -12   9   1    6.95    0.81
  12  -9   1    9.42    2.36
 -12   9   1    6.38    1.05
  12   9  -1    7.65    1.17
 -12  -9  -1    7.72    1.00
  12  -9   1    8.56    0.95
 -12  -9  -1    8.81    1.21
  12   9  -1    6.27    0.83
 -12   9   1    8.64    0.97
  12   9  -1    7.00    2.07
 -12  -9   1    6.46    0.97
  12  -9  -1    9.60    2.45
 -12   9  -1    5.54    1.01
 -12  -9   1    8.46    1.04
  12  -9  -1    5.75    0.85
 -12   9  -1    5.97    0.93
 -12   9  -1    6.92    0.71
  12   9   1    7.40    0.73
  12   9   1    6.47    1.95
 -12  -9   1    5.79    1.10
  12   9   1    9.05    1.46
 -13  -9  -1   24.48    1.58
  13  -9   1   24.17    1.33
 -13   9   1   22.45    1.78
  13   9  -1   23.48    3.45
 -13   9   1   25.37    1.74
 -13  -9  -1   26.16    1.75
 -13  -9  -1   23.06    2.33
 -13   9   1   22.72    1.50
  13   9  -1   26.84    2.00
  13  -9   1   28.64    2.93
  13   9  -1   23.56    1.50
 -13  -9   1   24.42    1.45
 -13  -9   1   23.44    1.60
 -13   9  -1   20.10    1.78
  13  -9  -1   28.26    3.05
  13   9   1   25.20    3.25
 -13   9  -1   23.14    1.39
 -13  -9   1   22.73    2.26
 -13   9  -1   21.96    1.70
  13   9   1   23.81    1.88
  13  -9  -1   22.99    1.51
  14   9  -1   10.62    1.62
 -14   9   1   10.33    1.47
  14   9   1   13.32    1.62
   0 -10  -1    1.94    0.32
   0 -10  -1    2.32    0.40
   0  10  -1    2.15    0.32
   0  10  -1    2.36    0.38
   0  10   1    3.22    0.42
   0 -10   1    2.50    0.34
   0 -10   1    2.74    0.31
   0 -10   1    2.44    0.36
   0 -10  -1    1.69    0.33
   0 -10   1    2.56    0.43
   0 -10   1    2.97    0.47
   0 -10  -1    1.99    0.34
   0  10   1    1.95    0.41
   0  10   1    2.70    0.50
   0  10   1    2.74    0.33
   0  10  -1    2.53    0.26
   0  10  -1    2.70    0.39
   0  10   1    1.99    0.32
   0 -10   1    2.15    0.34
   0  10   1    2.20    0.37
   0  10  -1    3.18    0.43
   0 -10  -1    2.50    0.32
   0  10  -1    2.07    0.33
   0  10  -1    2.59    0.47
   0 -10   1    1.64    0.39
   1  10  -1   23.39    0.91
   1  10  -1   21.95    0.93
   1  10  -1   22.85    0.98
  -1 -10  -1   19.91    0.88
   1 -10   1   24.15    1.22
  -1  10   1   22.00    0.90
  -1 -10  -1   23.40    1.12
   1 -10   1   22.55    0.97
   1 -10   1   21.10    0.93
  -1  10   1   21.84    0.97
  -1 -10  -1   24.10    0.92
   1 -10   1   22.56    0.93
  -1 -10  -1   23.19    0.90
   1 -10   1   22.02    0.97
  -1  10   1   24.10    0.95
   1 -10   1   21.63    0.89
  -1 -10  -1   22.06    0.92
   1 -10   1   22.28    0.87
  -1  10   1   22.02    0.92
   1  10  -1   21.60    1.02
   1  10   1   21.95    0.87
  -1  10  -1   20.85    0.97
  -1  10  -1   20.64    0.91
  -1  10  -1   22.18    0.80
   1  10   1   21.39    0.93
   1 -10  -1   22.53    0.92
  -1  10  -1   22.80    0.91
   1 -10  -1   23.25    0.98
  -1 -10   1   21.79    0.95
  -1 -10   1   24.18    0.94
   1  10   1   22.10    0.91
  -1  10  -1   20.95    0.89
   1  10   1   21.27    1.01
   1 -10  -1   23.55    1.17
   1  10   1   22.74    1.16
  -1  10  -1   20.76    1.53
  -1  10  -1   21.64    0.92
  -1 -10   1   22.00    0.90
   1 -10  -1   21.44    0.97
   1  10   1   20.83    0.87
  -1 -10   1   21.11    0.90
   1 -10  -1   20.54    0.93
   1 -10  -1   19.81    0.91
  -1 -10   1   21.36    0.98
  -2 -10  -1   82.62    2.81
  -2  10   1   88.30    2.82
  -2  10   1   83.16    2.79
  -2  10   1   85.49    3.26
   2  10  -1   83.75    2.91
   2 -10   1   86.17    3.05
  -2 -10  -1   90.60    2.83
  -2 -10  -1   89.26    3.00
   2  10  -1   89.37    2.85
  -2  10   1   86.57    2.82
   2 -10   1   86.44    2.92
  -2  10   1   83.51    2.86
  -2 -10  -1   84.59    2.79
   2  10  -1   83.47    2.85
   2  10  -1   87.92    2.81
   2 -10   1   88.35    2.84
   2  10  -1   87.13    2.82
   2 -10   1   79.05    2.89
   2 -10   1   87.33    2.75
   2 -10   1   82.22    2.85
  -2  10   1   85.62    2.85
   2  10  -1   87.65    2.80
  -2 -10  -1   86.52    2.79
   2 -10   1   83.47    2.80
   2  10   1   86.36    2.79
   2  10   1   85.55    2.83
  -2 -10   1   86.49    2.86
   2  10   1   88.67    3.01
   2 -10  -1   91.23    2.87
  -2 -10   1   85.49    2.81
   2 -10  -1   88.60    2.83
  -2 -10   1   84.94    2.84
  -2  10  -1   89.70    2.81
   2 -10  -1   78.11    2.79
   2 -10  -1   89.08    3.02
  -2 -10   1   84.01    3.02
   2  10   1   87.35    2.82
  -2  10  -1   85.62    2.82
   2 -10  -1   83.73    2.86
  -2  10  -1   81.49    2.83
  -2  10  -1   86.82    2.76
  -2 -10   1   81.08    2.82
  -2  10  -1   83.02    2.97
  -2  10  -1   86.38    3.29
  -2 -10   1   83.92    2.88
   2  10   1   86.82    2.78
   2  10   1   82.28    2.90
   2 -10  -1   80.53    2.82
   2  10   1   87.32    2.77
  -2 -10   1   86.69    2.80
  -2  10  -1   84.43    2.75
   3 -10   1  353.47   11.01
  -3 -10  -1  346.44   10.96
  -3  10   1  339.15   11.41
  -3  10   1  359.64   10.98
  -3 -10  -1  350.48   11.18
   3 -10   1  371.47   11.00
   3  10  -1  337.67   11.09
  -3 -10  -1  342.03   10.99
   3  10  -1  383.06   11.20
   3 -10   1  358.25   11.03
   3  10  -1  339.46   11.03
  -3  10   1  336.51   10.95
  -3 -10  -1  360.98   11.00
   3  10  -1  352.04   11.03
   3  10  -1  354.90   11.00
   3 -10   1  330.16   11.02
   3 -10   1  328.20   11.10
  -3 -10  -1  365.30   10.97
   3 -10   1  344.98   10.89
  -3  10   1  336.84   11.04
   3  10  -1  356.95   10.98
  -3  10   1  347.98   11.01
  -3  10   1  359.60   11.04
  -3 -10  -1  357.69   11.15
  -3  10   1  362.84   11.01
   3 -10  -1  355.71   10.91
   3  10   1  350.07   11.00
  -3 -10   1  364.04   11.05
   3  10   1  357.54   10.99
  -3  10  -1  335.06   10.98
   3  10   1  350.90   10.96
   3  10   1  355.45   10.89
   3 -10  -1  335.26   11.00
  -3  10  -1  341.83   11.07
  -3 -10   1  345.05   10.98
  -3  10  -1  348.07   10.99
   3  10   1  358.94   11.18
   3 -10  -1  362.33   11.04
  -3  10  -1  353.51   11.09
   3 -10  -1  344.08   11.04
  -3  10  -1  356.60   10.90
   3  10   1  349.46   10.96
  -3  10  -1  350.23   11.48
  -3 -10   1  352.40   11.21
   3  10   1  336.75   11.10
  -3  10  -1  347.47   10.97
  -3  10  -1  393.82   11.19
   3 -10  -1  348.62   11.01
  -3 -10   1  366.52   11.00
  -3 -10   1  335.81   11.00
   3 -10  -1  369.84   11.10
  -4  10   1   11.90    0.73
  -4  10   1   12.96    0.81
   4 -10   1   13.09    0.66
  -4 -10  -1   13.08    0.67
   4 -10   1   14.00    0.72
   4  10  -1   13.68    0.75
   4 -10   1   11.89    0.75
   4  10  -1   12.86    0.71
   4  10  -1   12.88    0.69
   4 -10   1   13.07    0.70
  -4  10   1   12.98    0.61
  -4 -10  -1   12.44    0.70
   4  10  -1   12.79    0.96
  -4 -10  -1   13.53    0.65
  -4 -10  -1   12.87    0.66
  -4  10   1   12.56    0.65
  -4 -10  -1   12.02    0.97
   4 -10   1   13.44    1.47
  -4  10   1   12.76    0.73
   4  10  -1   12.07    0.77
   4 -10  -1   12.79    0.80
   4 -10  -1   13.89    1.52
  -4 -10   1   12.03    0.48
   4  10   1   12.65    0.61
  -4  10  -1   12.73    0.72
  -4 -10   1   13.34    0.70
   4  10   1   13.21    0.71
  -4  10  -1   12.05    0.71
   4  10   1   13.19    0.53
   4  10   1   13.02    0.91
   4 -10  -1   11.34    0.73
  -4  10  -1   12.39    0.89
   4  10   1   12.75    0.65
  -4  10  -1   12.95    0.70
  -4 -10   1   13.02    1.01
   4 -10  -1   12.65    0.61
   4 -10  -1   12.27    0.93
  -4  10  -1   11.72    0.70
   4 -10  -1   12.23    0.75
  -4 -10   1   11.75    0.70
  -5  10   1  137.53    4.27
   5 -10   1  127.62    4.22
  -5 -10  -1  129.04    4.15
  -5  10   1  130.99    4.21
   5 -10   1  126.60    4.27
   5  10  -1  132.71    4.27
  -5  10   1  135.04    4.33
   5  10  -1  123.34    4.41
   5 -10   1  128.63    4.92
   5 -10   1  133.01    4.27
  -5  10   1  123.93    4.16
  -5 -10  -1  128.49    4.20
  -5 -10  -1  130.96    4.22
   5  10  -1  124.42    4.28
  -5 -10  -1  127.78    4.50
   5  10  -1  130.35    4.26
  -5  10   1  126.04    4.26
  -5 -10  -1  127.29    4.26
   5  10  -1  130.07    4.28
  -5  10  -1  132.06    4.27
  -5 -10   1  137.50    4.25
   5 -10  -1  134.06    4.27
   5 -10  -1  123.70    4.30
   5  10   1  130.63    4.23
  -5 -10   1  135.53    4.32
   5  10   1  134.94    4.13
   5  10   1  136.59    4.15
  -5 -10   1  134.50    4.27
   5  10   1  123.19    4.13
  -5  10  -1  132.60    4.27
  -5  10  -1  138.00    4.25
   5 -10  -1  134.49    4.95
   5  10   1  128.73    4.41
  -5 -10   1  132.63    4.54
   5 -10  -1  139.48    4.32
   5  10   1  134.21    4.19
  -5 -10   1  130.55    4.12
  -5  10  -1  140.85    4.25
  -5 -10   1  128.49    4.26
   5 -10  -1  136.67    4.20
  -5  10  -1  132.97    4.24
  -6  10   1  216.36    6.69
   6 -10   1  211.22    6.68
   6 -10   1  208.96    7.43
  -6 -10  -1  211.16    6.75
   6  10  -1  204.07    6.89
  -6 -10  -1  206.51    6.64
  -6 -10  -1  211.52    6.64
  -6  10   1  211.30    6.76
   6  10  -1  221.94    6.76
   6  10  -1  209.10    6.76
  -6 -10  -1  208.34    7.01
   6 -10   1  201.26    6.73
   6  10  -1  207.94    6.75
  -6  10   1  208.62    6.73
  -6  10   1  201.63    6.73
  -6  10   1  212.47    6.79
   6 -10   1  220.11    6.74
   6  10  -1  216.85    6.73
  -6 -10   1  204.86    6.61
   6  10   1  215.80    6.64
  -6  10  -1  217.13    6.74
  -6 -10   1  211.52    7.04
   6  10   1  207.30    6.89
  -6 -10   1  217.05    6.80
   6  10   1  220.27    6.68
   6 -10  -1  198.86    6.76
   6 -10  -1  206.40    7.41
  -6 -10   1  216.21    6.71
  -6 -10   1  206.12    6.72
   6  10   1  214.09    6.69
   6 -10  -1  209.30    6.77
   6 -10  -1  216.68    6.68
  -6  10  -1  215.16    6.69
   6  10   1  214.04    6.64
  -6  10  -1  208.36    6.70
  -6  10  -1  211.99    6.75
  -6  10  -1  210.70    6.68
   6 -10  -1  213.61    6.73
   7 -10   1  188.46    6.31
  -7  10   1  199.52    6.29
  -7  10   1  198.98    6.33
  -7 -10  -1  197.77    6.23
   7 -10   1  205.47    6.32
  -7 -10  -1  201.20    6.21
  -7  10   1  191.26    6.14
  -7  10   1  197.34    6.37
  -7  10   1  199.51    6.32
  -7 -10  -1  194.71    6.23
   7 -10   1  191.55    7.08
   7  10  -1  205.10    6.34
  -7 -10  -1  196.29    6.64
   7  10  -1  180.66    6.36
  -7 -10  -1  198.82    6.36
   7 -10   1  200.65    6.26
  -7 -10  -1  195.02    6.24
   7  10  -1  187.37    6.34
   7  10  -1  188.88    6.49
   7  10  -1  197.57    6.31
  -7  10   1  203.02    6.39
  -7 -10   1  197.59    6.21
  -7 -10   1  193.98    6.30
  -7  10  -1  197.72    6.28
  -7  10  -1  194.67    6.22
  -7  10  -1  199.99    6.36
  -7  10  -1  211.42    6.29
   7  10   1  200.52    6.21
   7 -10  -1  194.41    7.07
   7  10   1  194.58    6.27
   7  10   1  192.95    6.50
  -7 -10   1  193.97    6.28
   7  10   1  202.07    6.24
  -7  10  -1  204.22    6.32
   7 -10  -1  203.87    6.37
  -7 -10   1  202.80    6.36
   7 -10  -1  189.73    6.36
   7 -10  -1  195.39    6.31
   7  10   1  200.22    6.26
  -7 -10   1  193.01    6.65
  -8  10   1    2.49    0.51
  -8 -10  -1    1.90    0.65
   8 -10   1    2.63    0.43
  -8  10   1    2.64    0.31
   8  10  -1    2.79    0.58
   8 -10   1    2.83    0.35
  -8 -10  -1    2.34    0.40
   8  10  -1    2.41    0.76
  -8 -10  -1    2.17    0.37
   8  10  -1    2.81    0.52
   8  10  -1    2.65    0.47
   8 -10   1    2.49    0.49
  -8  10   1    2.51    0.60
  -8 -10  -1    2.86    0.58
  -8 -10  -1    3.05    0.49
   8 -10   1    2.95    1.16
  -8  10   1    3.20    0.57
  -8  10   1    2.33    0.53
  -8 -10  -1    2.54    0.36
  -8  10   1    2.21    0.58
  -8 -10   1    2.52    0.47
  -8 -10   1    2.88    0.46
  -8 -10   1    3.06    0.51
   8 -10  -1    2.69    0.53
   8  10   1    1.87    0.45
   8  10   1    2.88    0.75
   8  10   1    3.40    0.44
  -8 -10   1    2.51    0.58
  -8  10  -1    2.46    0.44
   8 -10  -1    2.75    1.17
  -8  10  -1    3.05    0.61
   8  10   1    1.41    0.48
  -8  10  -1    2.84    0.43
  -8 -10   1    2.74    0.65
  -8  10  -1    2.54    0.41
  -8  10  -1    2.79    0.47
   8  10   1    1.86    0.31
   8 -10  -1    1.84    0.54
  -9 -10  -1   84.92    3.34
   9  10  -1   85.54    2.82
  -9 -10  -1   81.42    2.93
   9  10  -1   81.28    2.88
  -9  10   1   73.53    3.07
  -9  10   1   70.96    3.34
   9 -10   1   80.79    2.81
  -9 -10  -1   81.56    2.70
   9 -10   1   79.53    2.71
  -9  10   1   83.22    2.87
   9  10  -1   83.47    3.15
  -9  10   1   82.77    2.96
  -9 -10  -1   81.05    2.79
  -9  10  -1   82.37    2.77
  -9  10  -1   83.65    2.96
   9 -10  -1   79.23    3.81
  -9 -10   1   81.27    2.89
   9 -10  -1   77.22    3.44
  -9  10  -1   83.06    2.80
  -9  10  -1   83.37    3.06
   9 -10  -1   82.08    2.85
  -9 -10   1   73.27    3.31
   9  10   1   80.29    2.74
   9  10   1   80.77    3.09
  -9 -10   1   83.29    2.82
  -9 -10   1   84.13    2.79
 -10 -10  -1    9.92    0.73
 -10  10   1    8.97    1.25
  10  10  -1   10.08    1.32
 -10  10   1   10.39    1.05
 -10 -10  -1    9.44    1.45
 -10  10   1   10.63    1.16
 -10  10   1    9.03    0.97
  10 -10   1    9.70    1.95
  10  10  -1    8.04    0.97
 -10 -10  -1   10.89    0.99
  10 -10   1    9.26    1.02
 -10 -10  -1    9.14    1.09
 -10 -10   1    9.42    0.95
  10 -10  -1    9.04    1.06
 -10  10  -1    9.07    1.11
  10 -10  -1    7.81    0.98
  10 -10  -1    9.55    2.02
 -10 -10   1    8.27    1.00
  10  10   1    8.16    0.78
  10  10   1    9.35    1.21
 -10 -10   1    9.65    1.09
 -10  10  -1   10.00    1.14
 -10 -10   1    8.38    1.47
  11  10  -1   51.53    2.12
 -11 -10  -1   51.96    2.27
 -11 -10  -1   52.85    1.88
 -11 -10  -1   53.49    2.12
 -11  10   1   53.93    2.21
  11 -10   1   52.93    3.36
  11 -10   1   51.80    2.04
 -11  10   1   52.02    2.12
  11  10  -1   52.98    2.50
 -11  10   1   51.69    2.29
  11  10  -1   49.69    3.55
 -11 -10  -1   52.25    2.72
 -11  10  -1   53.39    2.27
  11  10   1   50.82    3.48
 -11 -10   1   54.38    2.78
 -11  10  -1   55.47    2.30
 -11 -10   1   55.25    2.08
  11 -10  -1   53.30    3.39
  11 -10  -1   50.74    2.16
 -11 -10   1   53.09    2.12
  11  10   1   53.87    1.92
  11  10   1   53.75    2.41
 -11  10  -1   54.15    2.02
 -11 -10   1   53.09    2.27
 -12  10   1    2.41    0.85
  12 -10   1    3.36    1.63
  12  10  -1    3.03    1.07
  12  10  -1    2.44    0.76
  12  10  -1    1.67    1.88
 -12 -10  -1    1.21    0.85
  12 -10   1    2.22    0.64
 -12  10   1    2.20    0.92
 -12 -10  -1    3.61    0.94
 -12 -10  -1    0.70    0.93
 -12  10   1    1.59    0.71
  12 -10  -1    2.35    0.73
 -12  10  -1    2.44    0.66
 -12 -10   1    2.37    1.10
 -12 -10   1    1.45    0.67
  12  10   1    2.78    1.04
 -12  10  -1    2.58    0.86
 -12  10  -1    0.98    0.94
  12  10   1    2.33    1.88
 -12 -10   1    0.69    0.91
 -12 -10   1    1.21    0.85
  12 -10  -1    4.20    1.72
 -13  10   1   26.60    1.75
 -13  10   1   24.68    1.71
  13  10  -1   23.19    3.47
  13 -10   1   30.21    2.92
 -13 -10  -1   25.84    2.32
  13  10  -1   22.04    1.51
 -13  10   1   24.98    1.50
 -13 -10  -1   26.12    1.76
  13 -10   1   23.22    1.37
  13  10  -1   23.67    2.06
 -13  10  -1   21.61    1.87
 -13 -10   1   22.89    1.61
 -13 -10   1   24.12    2.24
  13 -10  -1   22.35    1.56
 -13 -10   1   25.92    1.49
 -13  10  -1   25.15    1.43
  13  10   1   24.97    3.18
 -13  10  -1   23.80    1.66
  13 -10  -1   26.13    3.05
  13  10   1   24.33    1.95
  14  10  -1   13.23    1.24
 -14  10   1   13.12    1.49
  14 -10   1   14.31    1.73
 -14 -10   1   10.46    1.24
   0  11  -1   51.67    1.65
   0 -11   1   50.06    1.79
   0  11   1   51.06    1.85
   0 -11  -1   54.53    2.01
   0 -11  -1   52.41    1.78
   0 -11  -1   47.84    1.78
   0 -11   1   49.29    1.80
   0  11  -1   51.58    1.77
   0 -11   1   51.93    2.03
   0  11   1   49.34    1.82
   0 -11   1   51.14    1.79
   0 -11  -1   49.77    1.82
   0  11  -1   50.37    1.84
   0  11   1   52.09    1.79
   0  11   1   50.60    1.77
   0  11   1   54.69    1.81
   0 -11   1   52.42    1.81
   0 -11  -1   49.67    1.80
   0 -11   1   51.37    1.77
   0  11  -1   50.29    1.80
   0 -11  -1   54.51    1.77
   1 -11   1   43.79    1.57
  -1  11   1   42.18    1.55
  -1 -11  -1   46.00    1.54
   1 -11   1   43.76    1.51
  -1 -11  -1   45.63    1.76
   1  11  -1   40.88    1.53
   1 -11   1   41.41    1.56
   1 -11   1   44.04    1.53
  -1  11   1   43.33    1.61
   1  11  -1   45.05    1.57
  -1 -11  -1   42.57    1.54
   1 -11   1   42.74    1.60
   1  11  -1   41.84    1.60
  -1 -11  -1   42.61    1.56
  -1  11   1   44.34    1.58
  -1  11   1   45.68    1.55
  -1 -11  -1   43.96    1.57
   1 -11   1   45.89    1.85
   1  11  -1   40.43    1.81
  -1  11   1   40.45    2.14
   1  11  -1   42.90    1.64
   1  11   1   45.46    1.56
  -1 -11   1   43.37    1.62
   1  11   1   42.82    1.64
  -1 -11   1   43.97    1.81
  -1  11  -1   41.58    2.16
  -1  11  -1   43.25    1.43
  -1  11  -1   42.88    1.53
  -1 -11   1   42.78    1.53
  -1 -11   1   43.47    1.59
  -1  11  -1   43.54    1.56
   1 -11  -1   42.76    1.60
   1 -11  -1   43.74    1.58
   1  11   1   42.07    1.52
   1 -11  -1   46.16    1.81
  -1 -11   1   43.81    1.57
   1 -11  -1   44.64    1.56
  -1 -11   1   40.99    1.56
   1  11   1   40.64    1.51
   1 -11  -1   43.23    1.55
   1  11   1   41.45    1.57
  -1  11  -1   43.94    1.61
  -1  11  -1   42.93    1.57
   1  11   1   43.56    1.78
  -1  11  -1   43.39    1.54
   1 -11  -1   43.64    1.58
   2  11  -1   21.39    1.01
   2  11  -1   22.12    0.98
   2 -11   1   22.80    0.96
  -2 -11  -1   23.66    1.19
   2  11  -1   22.09    1.09
  -2  11   1   21.93    0.94
   2 -11   1   22.52    1.01
   2  11  -1   24.47    0.98
   2 -11   1   21.40    0.96
   2 -11   1   22.30    0.85
   2 -11   1   23.46    1.29
  -2 -11  -1   22.99    0.93
  -2  11   1   21.82    1.48
  -2  11   1   23.07    0.92
   2  11  -1   22.59    0.91
  -2  11   1   20.97    0.97
  -2 -11  -1   21.43    0.93
   2  11  -1   23.33    0.98
  -2  11   1   21.31    1.02
  -2 -11  -1   22.12    0.95
  -2  11   1   22.43    0.97
   2 -11   1   21.41    1.07
   2  11   1   21.92    0.97
  -2  11  -1   21.64    0.85
  -2 -11   1   23.38    0.95
  -2  11  -1   24.70    1.67
  -2 -11   1   21.87    1.22
   2  11   1   24.04    0.95
   2  11   1   22.85    1.09
  -2  11  -1   22.11    0.88
   2  11   1   20.62    1.21
  -2  11  -1   23.28    0.95
  -2 -11   1   21.13    0.97
  -2 -11   1   21.78    0.92
   2 -11  -1   21.18    1.10
   2 -11  -1   22.80    0.98
  -2 -11   1   23.11    1.04
  -2 -11   1   22.95    1.02
   2 -11  -1   22.22    0.80
   2 -11  -1   21.86    1.03
  -2  11  -1   22.05    0.96
   2  11   1   22.47    0.90
   2  11   1   21.73    0.81
  -2  11  -1   21.41    1.00
   2 -11  -1   23.37    0.99
  -2 -11   1   22.96    1.08
   2 -11  -1   23.23    1.25
   2 -11  -1   24.41    0.97
   3  11  -1   49.23    1.80
   3  11  -1   47.10    1.84
  -3 -11  -1   50.81    2.03
  -3 -11  -1   51.00    1.76
  -3 -11  -1   49.59    1.79
   3 -11   1   52.93    1.80
   3 -11   1   47.72    1.93
   3 -11   1   51.79    1.82
   3 -11   1   50.82    1.80
   3  11  -1   47.04    1.93
  -3  11   1   46.96    1.80
  -3  11   1   46.91    1.72
   3 -11   1   47.84    1.84
  -3  11   1   50.33    1.80
   3  11  -1   50.28    1.82
  -3 -11  -1   50.24    1.77
   3 -11   1   49.72    2.10
  -3  11   1   50.22    1.78
  -3  11   1   49.58    1.87
   3  11  -1   50.87    1.75
   3  11   1   55.68    2.24
  -3 -11   1   49.62    1.81
   3  11   1   52.42    1.75
  -3  11  -1   49.72    1.80
   3  11   1   47.48    1.93
  -3  11  -1   54.63    1.80
   3 -11  -1   50.87    1.87
   3 -11  -1   53.03    1.68
   3 -11  -1   50.16    1.85
  -3 -11   1   51.51    2.07
  -3  11  -1   52.40    1.68
  -3  11  -1   53.78    1.88
   3 -11  -1   58.37    1.98
   3  11   1   53.87    1.79
  -3  11  -1   51.54    1.76
   3 -11  -1   50.79    1.82
  -3 -11   1   54.91    1.88
  -3 -11   1   53.24    1.80
  -3 -11   1   50.82    1.76
   3  11   1   51.06    1.81
  -3  11  -1   53.73    1.85
   4  11  -1    9.78    0.94
   4  11  -1    9.89    0.67
   4 -11   1   10.15    0.69
  -4 -11  -1   10.25    0.64
   4 -11   1    9.10    0.73
  -4 -11  -1   10.72    0.63
  -4  11   1   10.10    0.78
  -4  11   1    8.73    0.71
  -4 -11  -1    9.76    0.60
  -4  11   1   10.76    0.70
   4  11  -1    9.94    0.70
   4  11  -1   10.32    0.76
  -4  11   1    9.72    0.61
   4 -11   1   10.32    0.66
   4 -11   1   10.24    0.66
   4  11  -1   10.27    0.63
  -4  11   1    9.37    0.51
  -4  11   1    9.86    0.59
  -4 -11  -1    9.76    0.97
  -4 -11   1    9.79    0.77
  -4 -11   1    9.75    0.37
   4 -11  -1    9.18    0.68
   4  11   1   10.16    0.69
  -4  11  -1   10.59    0.69
  -4 -11   1    9.76    0.70
  -4  11  -1    8.78    0.74
   4  11   1    9.55    0.90
   4  11   1   10.57    0.61
   4  11   1   10.26    0.45
   4 -11  -1    9.75    0.74
   4 -11  -1   10.76    0.56
   4 -11  -1    9.37    0.91
  -4  11  -1    8.65    0.67
   4  11   1    9.35    0.56
  -4  11  -1   10.63    0.79
  -4 -11   1   10.64    0.67
  -4 -11   1    9.35    0.65
  -4  11  -1   10.19    0.68
   4 -11  -1    9.14    0.77
  -4 -11   1    9.09    0.98
   5  11  -1  227.01    7.64
   5  11  -1  245.22    7.48
  -5  11   1  228.91    7.37
  -5 -11  -1  232.34    7.49
  -5  11   1  231.14    7.55
  -5 -11  -1  243.25    7.43
  -5 -11  -1  237.56    7.46
   5 -11   1  249.96    7.52
  -5  11   1  239.85    7.38
   5  11  -1  231.43    7.51
   5 -11   1  240.39    7.48
  -5  11   1  228.90    7.49
   5 -11   1  224.60    7.51
  -5  11   1  220.86    7.38
   5  11  -1  236.61    7.53
   5 -11   1  237.45    8.21
  -5 -11  -1  228.87    7.43
  -5 -11  -1  236.10    7.75
   5  11  -1  238.37    7.48
  -5  11   1  236.91    7.50
  -5 -11   1  224.29    7.46
   5  11   1  256.37    7.47
   5 -11  -1  232.19    7.54
   5  11   1  239.75    7.47
  -5 -11   1  235.66    7.34
  -5 -11   1  246.08    7.48
  -5 -11   1  236.56    7.78
   5 -11  -1  242.36    8.21
  -5  11  -1  249.04    7.48
  -5 -11   1  227.52    7.48
  -5  11  -1  238.72    7.49
   5  11   1  245.63    7.43
  -5  11  -1  245.81    7.53
  -5  11  -1  237.19    7.71
   5 -11  -1  233.84    7.50
  -5 -11   1  239.46    7.53
   5 -11  -1  239.52    7.42
   5 -11  -1  228.54    7.54
   5  11   1  227.04    7.63
  -5  11  -1  228.62    7.47
   6  11  -1    3.21    0.73
  -6 -11  -1    3.26    0.51
   6 -11   1    3.41    0.50
  -6 -11  -1    2.54    0.58
   6  11  -1    2.92    0.53
   6 -11   1    3.85    1.20
   6  11  -1    3.13    0.46
  -6  11   1    3.32    0.35
  -6  11   1    3.92    0.60
  -6  11   1    3.18    0.49
   6 -11   1    3.19    0.49
  -6  11   1    3.63    0.56
   6  11  -1    3.09    0.48
   6 -11   1    3.76    0.47
   6  11  -1    2.82    0.49
  -6  11   1    2.91    0.31
  -6 -11  -1    3.87    0.62
  -6 -11   1    2.68    0.59
   6 -11  -1    3.16    0.54
   6  11   1    4.57    0.66
  -6  11  -1    2.91    0.65
   6 -11  -1    2.34    1.11
   6  11   1    3.99    0.59
  -6  11  -1    2.89    0.44
  -6  11  -1    3.68    0.44
   6  11   1    3.39    0.47
   6 -11  -1    4.86    0.61
  -6  11  -1    3.24    0.45
  -6 -11   1    2.21    0.47
  -6  11  -1    3.76    0.53
   6 -11  -1    3.82    0.52
   6  11   1    3.48    0.71
  -6 -11   1    3.30    0.37
  -6 -11   1    3.40    0.54
   6  11   1    2.49    0.35
  -6 -11   1    2.85    0.45
  -7 -11  -1   18.46    0.89
   7  11  -1   16.42    1.06
  -7 -11  -1   17.75    1.39
   7  11  -1   17.92    1.33
  -7  11   1   18.59    1.00
  -7  11   1   18.44    1.15
   7  11  -1   19.05    1.06
   7  11  -1   16.97    0.97
   7 -11   1   15.80    1.83
  -7 -11  -1   17.73    0.86
  -7  11   1   18.37    1.11
   7 -11   1   18.44    1.03
   7  11  -1   19.14    1.01
  -7 -11  -1   17.72    0.85
   7 -11   1   16.36    1.15
  -7  11   1   16.93    1.01
   7 -11   1   19.22    0.97
  -7 -11  -1   17.33    1.07
  -7 -11  -1   17.90    0.81
   7  11   1   19.01    0.85
  -7  11  -1   17.61    0.82
  -7 -11   1   16.76    0.90
   7 -11  -1   18.60    1.08
  -7  11  -1   19.07    0.97
  -7 -11   1   19.78    1.09
  -7 -11   1   18.27    0.97
   7  11   1   17.45    0.95
   7  11   1   18.12    0.80
   7 -11  -1   17.56    1.95
  -7 -11   1   18.04    1.42
  -7  11  -1   17.46    0.96
  -7 -11   1   18.94    1.02
  -7  11  -1   17.53    1.06
   7 -11  -1   19.20    1.05
   7  11   1   17.33    1.26
   7  11   1   18.18    0.84
   8  11  -1   35.24    1.63
   8  11  -1   36.14    1.55
  -8 -11  -1   35.13    1.39
  -8 -11  -1   36.11    1.58
   8  11  -1   36.05    1.47
   8 -11   1   35.66    1.51
   8 -11   1   34.03    2.42
  -8 -11  -1   34.83    1.35
  -8  11   1   35.03    1.51
   8  11  -1   34.64    1.80
  -8  11   1   34.88    1.65
  -8 -11  -1   36.07    1.91
  -8  11   1   36.60    1.50
  -8  11   1   34.49    1.61
  -8 -11  -1   36.33    1.37
   8  11   1   33.54    1.75
   8 -11  -1   33.98    1.51
  -8  11  -1   34.47    1.56
   8  11   1   35.81    1.29
  -8  11  -1   34.44    1.26
  -8 -11   1   36.88    1.50
  -8 -11   1   36.42    1.99
  -8 -11   1   36.77    1.38
   8 -11  -1   36.54    2.49
   8  11   1   35.44    1.32
   8 -11  -1   34.28    1.56
   8  11   1   34.55    1.42
  -8  11  -1   34.69    1.45
  -8 -11   1   36.41    1.55
  -9 -11  -1   28.44    1.17
  -9  11   1   25.80    1.34
  -9 -11  -1   25.78    2.05
  -9  11   1   28.68    1.54
   9  11  -1   26.50    1.29
   9  11  -1   24.95    1.54
   9  11  -1   26.63    1.78
  -9 -11  -1   29.26    1.45
  -9 -11  -1   28.77    1.27
   9 -11   1   26.39    2.34
  -9  11   1   27.28    1.55
  -9  11   1   26.43    1.34
   9 -11   1   25.38    1.29
   9 -11  -1   25.24    1.37
   9  11   1   27.36    1.22
  -9 -11   1   26.85    1.41
  -9 -11   1   25.60    1.85
  -9 -11   1   27.37    1.24
  -9 -11   1   26.42    1.36
  -9  11  -1   26.48    1.27
  -9 -11   1   28.63    1.38
  -9  11  -1   22.49    1.73
   9 -11  -1   26.28    3.21
   9 -11  -1   28.93    1.37
 -10 -11  -1   14.37    0.88
  10  11  -1   13.82    1.12
  10  11  -1   16.93    1.53
 -10  11   1   14.85    1.16
  10 -11   1   14.89    2.16
 -10  11   1   14.79    1.34
 -10 -11  -1   15.48    1.63
  10 -11   1   14.34    1.02
 -10 -11  -1   12.22    1.20
 -10  11   1   12.99    1.10
 -10 -11  -1   14.86    1.09
 -10  11   1   13.61    1.27
 -10 -11   1   14.58    1.66
  10 -11  -1   14.50    2.28
 -10 -11   1   14.52    1.10
  10  11   1   13.91    0.94
  10 -11  -1   14.68    1.15
  10 -11  -1   13.66    1.17
 -10 -11   1   15.92    1.06
 -10 -11   1   15.03    1.24
 -10  11  -1   14.08    1.00
 -10  11  -1   13.01    1.20
  10  11   1   14.53    1.39
 -11 -11  -1   11.60    1.31
 -11 -11  -1   11.37    0.87
  11 -11   1   12.09    1.06
 -11  11   1   11.91    1.24
  11 -11   1   13.23    2.32
 -11 -11  -1   14.35    1.15
 -11  11   1   11.87    1.36
 -11  11   1   11.66    1.16
 -11 -11  -1   11.73    1.75
  11  11  -1   14.29    1.62
  11  11  -1   10.61    1.13
  11  11  -1   12.30    2.72
 -11  11  -1   11.91    1.01
 -11 -11   1   11.94    1.78
  11 -11  -1   11.57    1.24
 -11 -11   1   13.79    1.32
  11  11   1   10.65    0.92
 -11 -11   1   11.53    1.12
  11 -11  -1   12.55    2.46
  11  11   1   12.39    1.46
 -11 -11   1   11.01    1.16
  11  11   1   11.03    2.65
 -11  11  -1   11.50    1.31
 -12 -11  -1   27.81    1.74
 -12 -11  -1   25.15    2.29
  12  11  -1   28.43    3.29
 -12  11   1   26.22    1.50
 -12  11   1   24.72    1.63
  12  11  -1   26.74    2.02
  12 -11   1   27.18    2.91
  12  11  -1   25.09    1.52
  12 -11   1   24.58    1.40
 -12  11   1   26.35    1.77
  12  11   1   25.61    1.89
 -12  11  -1   28.06    1.43
 -12 -11   1   23.42    1.45
 -12 -11   1   25.55    1.68
  12 -11  -1   23.69    1.56
  12  11   1   25.90    3.17
  12  11   1   26.05    1.22
 -12 -11   1   23.44    2.22
  12 -11  -1   25.96    3.00
 -12  11  -1   25.56    1.70
  13 -11   1    8.75    1.11
  13  11  -1    8.79    1.01
  13  11  -1   12.73    2.97
 -13 -11  -1    7.66    1.26
 -13 -11  -1   10.38    1.43
 -13  11   1    8.08    0.95
  13  11  -1   12.55    1.83
 -13  11   1   10.37    1.45
 -13 -11   1    7.79    0.92
 -13  11  -1   10.14    1.20
  13 -11  -1   10.45    2.61
 -13  11  -1   10.03    1.57
  13 -11  -1    7.55    0.97
  13  11   1   10.52    1.67
 -13 -11   1    8.29    1.17
 -14  11   1    8.27    1.09
  14 -11   1    9.20    0.95
 -14 -11   1   10.24    1.30
   0  12   1   29.48    1.26
   0  12  -1   29.75    1.23
   0  12  -1   30.16    1.29
   0 -12  -1   32.09    1.47
   0 -12  -1   28.41    1.21
   0 -12   1   28.82    1.18
   0  12  -1   31.12    1.19
   0 -12  -1   31.15    1.21
   0 -12  -1   34.88    1.14
   0 -12   1   31.11    1.22
   0  12  -1   30.44    1.22
   0  12   1   29.76    1.28
   0 -12  -1   31.10    1.27
   0 -12   1   31.96    1.23
   0  12  -1   32.23    1.03
   0 -12   1   31.02    1.21
   0 -12   1   31.07    1.29
   0  12   1   31.42    1.24
   0  12   1   32.18    1.23
   0  12  -1   31.41    1.27
   0 -12   1   29.28    1.23
   1 -12   1   21.88    0.99
  -1  12   1   21.45    0.98
   1 -12   1   22.34    1.07
   1  12  -1   23.02    1.04
   1 -12   1   24.16    1.32
  -1  12   1   24.52    1.00
  -1 -12  -1   21.50    0.96
   1 -12   1   24.04    1.01
   1  12  -1   22.11    0.97
   1  12  -1   21.80    1.08
  -1  12   1   21.77    1.04
  -1 -12  -1   22.87    1.02
   1 -12   1   22.89    0.93
  -1 -12  -1   23.33    1.22
  -1 -12  -1   21.92    0.96
  -1  12   1   22.35    1.01
   1  12  -1   22.33    0.98
  -1  12  -1   22.80    1.05
  -1  12  -1   21.94    0.96
  -1  12  -1   23.16    0.82
  -1 -12   1   21.86    0.93
   1  12   1   21.64    1.00
   1 -12  -1   18.92    1.00
  -1  12  -1   22.05    0.98
  -1 -12   1   23.02    1.01
   1  12   1   22.61    0.97
   1  12   1   21.08    1.24
  -1 -12   1   21.81    1.25
  -1 -12   1   20.37    1.05
   1 -12  -1   22.69    0.99
   1 -12  -1   23.31    1.30
   1  12   1   21.85    1.09
  -1  12  -1   21.98    0.96
   1 -12  -1   23.51    0.99
  -1 -12   1   21.77    0.99
  -1 -12   1   21.20    0.94
   1  12   1   22.75    0.97
  -2  12   1   30.03    1.18
   2 -12   1   30.30    1.27
  -2 -12  -1   28.56    1.18
  -2 -12  -1   30.30    1.21
   2 -12   1   29.65    1.11
   2  12  -1   29.81    1.22
  -2  12   1   33.52    1.43
  -2  12   1   31.68    1.23
   2 -12   1   30.02    1.22
  -2  12   1   28.74    1.28
   2 -12   1   31.83    1.56
   2 -12   1   29.80    1.34
  -2 -12  -1   30.79    1.45
   2  12  -1   29.13    1.35
   2 -12   1   30.20    1.22
   2  12  -1   30.48    1.28
   2  12  -1   30.34    1.15
  -2 -12  -1   32.61    1.20
   2 -12  -1   30.61    1.30
  -2 -12   1   31.27    1.29
  -2 -12   1   31.94    1.50
   2 -12  -1   30.87    1.05
  -2  12  -1   29.74    1.26
   2 -12  -1   33.74    1.33
   2  12   1   30.01    1.35
   2  12   1   29.71    1.23
  -2 -12   1   31.05    1.32
  -2  12  -1   30.20    1.10
  -2 -12   1   29.97    1.20
  -2 -12   1   29.83    1.23
   2 -12  -1   32.66    1.53
   2  12   1   31.02    1.17
  -2  12  -1   30.89    1.14
   2  12   1   29.64    1.02
  -2  12  -1   28.85    1.21
   2 -12  -1   28.84    1.22
   2  12   1   31.84    1.22
  -3 -12  -1   12.22    1.00
  -3 -12  -1   12.68    0.73
  -3 -12  -1   13.15    0.75
  -3  12   1   13.89    0.87
   3  12  -1   13.87    0.76
   3  12  -1   12.91    0.66
   3 -12   1   13.40    0.75
  -3 -12  -1   13.48    0.71
   3  12  -1   12.40    0.97
   3  12  -1   12.67    0.78
   3 -12   1   13.60    0.78
   3 -12   1   13.82    1.15
   3  12  -1   12.35    0.83
   3 -12   1   12.79    0.83
  -3  12   1   12.75    0.79
  -3  12   1   12.32    0.65
   3 -12   1   12.53    0.94
  -3  12  -1   14.11    0.85
   3 -12  -1   12.46    0.80
   3  12   1   12.00    0.93
   3 -12  -1   13.12    0.99
   3 -12  -1   13.20    1.12
   3  12   1   11.94    0.78
  -3 -12   1   13.53    1.07
  -3  12  -1   13.01    0.76
   3 -12  -1   12.25    0.85
   3  12   1   12.78    0.66
  -3  12  -1   13.19    0.61
  -3  12  -1   12.96    0.76
   3  12   1   12.15    0.52
  -3 -12   1   12.35    0.78
   3  12   1   13.18    0.72
  -3 -12   1   12.77    0.67
   3 -12  -1   13.13    0.59
  -3 -12   1   13.61    0.75
  -3 -12   1   13.88    0.87
  -3  12  -1   12.91    0.69
  -3  12  -1   13.27    0.90
  -4 -12  -1   77.79    2.71
  -4  12   1   80.79    2.77
   4 -12   1   81.90    2.80
   4  12  -1   78.60    2.81
   4  12  -1   83.14    2.75
  -4  12   1   78.83    2.64
  -4 -12  -1   79.26    2.73
  -4  12   1   80.65    2.83
   4 -12   1   78.67    2.74
   4  12  -1   83.26    2.70
   4  12  -1   77.61    2.92
  -4 -12  -1   85.01    2.71
  -4 -12  -1   81.20    3.02
   4  12  -1   80.16    2.77
   4 -12   1   80.98    2.77
  -4  12   1   72.67    2.65
  -4  12   1   82.20    2.70
   4  12   1   90.28    2.75
  -4  12  -1   82.29    2.73
   4 -12  -1   84.96    2.65
   4 -12  -1   80.42    2.82
  -4 -12   1   84.47    2.75
  -4 -12   1   80.64    2.81
  -4  12  -1   83.50    2.80
   4  12   1   81.13    2.75
  -4 -12   1   82.88    2.70
  -4 -12   1   78.20    2.75
  -4  12  -1   80.76    2.80
   4  12   1   82.71    2.58
   4  12   1   79.97    2.92
  -4  12  -1   79.97    2.74
  -4  12  -1   87.34    2.76
   4 -12  -1   78.89    2.77
   4  12   1   86.20    2.70
  -4 -12   1   79.75    3.04
  -5 -12  -1  203.82    6.24
   5  12  -1  194.00    6.32
  -5  12   1  191.12    6.15
   5 -12   1  193.99    6.32
   5 -12   1  203.91    7.13
   5 -12   1  197.73    6.28
   5  12  -1  202.54    6.26
   5 -12   1  196.03    6.31
  -5 -12  -1  189.10    6.55
   5  12  -1  192.83    6.28
  -5 -12  -1  199.05    6.29
   5  12  -1  187.16    6.33
  -5 -12  -1  186.68    6.23
  -5  12   1  193.00    6.16
  -5  12   1  197.30    6.36
  -5  12   1  186.23    6.29
   5  12  -1  192.41    6.47
  -5  12   1  204.49    6.20
  -5 -12  -1  196.81    6.26
  -5 -12   1  200.26    6.26
   5  12   1  195.79    6.28
  -5  12  -1  190.50    6.27
   5 -12  -1  200.43    6.21
   5 -12  -1  201.16    6.30
  -5  12  -1  208.20    6.29
  -5  12  -1  199.74    6.28
   5  12   1  192.49    6.46
  -5  12  -1  205.40    6.31
   5 -12  -1  191.62    6.35
  -5 -12   1  194.60    6.10
   5  12   1  201.47    6.23
  -5 -12   1  201.78    6.28
  -5 -12   1  192.15    6.59
  -5  12  -1  195.78    6.33
   5  12   1  203.24    6.27
  -6  12   1   14.39    0.98
  -6 -12  -1   14.83    1.27
  -6  12   1   14.16    0.61
  -6 -12  -1   14.62    0.95
   6  12  -1   14.81    0.87
  -6  12   1   13.97    1.04
   6  12  -1   14.36    0.87
   6 -12   1   13.68    1.84
  -6  12   1   13.72    0.92
   6  12  -1   14.03    0.97
  -6 -12  -1   14.21    0.76
   6  12  -1   13.76    0.90
  -6  12   1   14.39    0.57
   6 -12   1   14.05    0.87
   6 -12   1   13.68    0.93
  -6  12   1   15.14    0.69
   6  12  -1   13.37    1.21
   6 -12   1   13.88    0.86
  -6  12   1   14.58    0.56
   6 -12  -1   14.25    0.81
  -6 -12   1   14.32    0.92
   6 -12  -1   15.48    1.93
   6  12   1   15.51    0.78
   6  12   1   13.10    1.14
   6 -12  -1   13.97    0.96
  -6  12  -1   14.04    0.96
  -6 -12   1   14.59    0.87
   6 -12  -1   13.22    0.97
  -6  12  -1   14.63    0.87
  -6 -12   1   13.50    0.59
   6  12   1   15.21    0.88
   6  12   1   14.50    0.71
  -6  12  -1   13.27    1.00
  -6  12  -1   14.29    0.88
  -6  12  -1   14.78    0.94
  -6 -12   1   13.59    0.99
  -6 -12   1   14.20    1.32
   7  12  -1   56.62    2.06
   7  12  -1   53.27    2.35
   7 -12   1   55.55    2.07
   7 -12   1   55.23    2.02
  -7 -12  -1   56.99    1.98
  -7 -12  -1   57.45    2.47
  -7 -12  -1   57.01    1.99
  -7  12   1   55.55    2.14
   7  12  -1   56.48    2.07
  -7 -12  -1   54.97    1.93
   7 -12   1   56.07    3.03
  -7  12   1   59.05    2.20
  -7  12   1   56.50    2.09
  -7 -12  -1   56.88    2.13
   7 -12   1   52.81    2.09
   7  12  -1   52.05    2.11
   7  12  -1   54.55    2.07
  -7 -12  -1   53.52    2.00
  -7 -12   1   57.92    2.51
  -7  12  -1   56.00    2.04
   7 -12  -1   54.11    2.14
  -7 -12   1   54.84    1.87
  -7 -12   1   55.89    2.07
   7  12   1   57.77    2.05
   7  12   1   55.66    2.32
   7  12   1   57.83    1.88
  -7 -12   1   59.17    2.15
  -7  12  -1   55.42    2.11
   7  12   1   55.11    2.02
   7 -12  -1   56.70    3.07
   7  12   1   57.46    1.89
  -7  12  -1   56.46    1.96
   7 -12  -1   56.56    2.10
  -7 -12   1   56.38    2.05
  -7  12  -1   57.32    2.11
   7  12   1   57.14    1.93
  -7  12  -1   57.20    2.06
   8 -12   1    2.86    1.30
   8 -12   1    2.59    0.55
  -8 -12  -1    2.71    0.47
  -8 -12  -1    2.75    0.71
  -8  12   1    2.81    0.64
   8 -12   1    2.54    0.51
  -8  12   1    2.22    0.67
  -8  12   1    2.09    0.65
  -8 -12  -1    3.21    0.49
   8  12  -1    2.02    0.55
   8  12  -1    2.33    0.59
  -8 -12  -1    2.89    0.64
   8  12  -1    3.33    0.87
  -8  12   1    2.29    0.57
  -8 -12   1    2.65    0.63
   8  12   1    2.17    0.50
   8 -12  -1    2.33    0.62
   8 -12  -1    2.55    0.62
   8  12   1    2.14    0.34
  -8  12  -1    2.18    0.31
  -8  12  -1    2.14    0.57
   8  12   1    3.14    0.81
  -8  12  -1    3.39    0.62
  -8  12  -1    3.03    0.51
  -8 -12   1    2.62    0.44
  -8 -12   1    2.95    0.73
   8 -12  -1    2.94    1.31
   8  12   1    2.81    0.42
  -8 -12   1    2.19    0.54
   9 -12   1   83.12    2.94
   9  12  -1   82.32    3.04
  -9 -12  -1   86.10    2.88
   9  12  -1   89.10    3.00
  -9  12   1   85.99    3.17
  -9  12   1   84.97    3.03
  -9  12   1   84.75    3.02
  -9  12   1   84.32    3.11
   9 -12   1   80.50    3.03
   9 -12   1   85.56    4.09
  -9 -12  -1   85.66    3.49
   9  12  -1   85.04    3.32
  -9 -12  -1   85.25    2.91
  -9 -12   1   88.53    3.00
  -9 -12   1   87.22    3.13
   9 -12  -1   84.69    4.12
  -9 -12   1   89.17    3.07
  -9 -12   1   86.10    2.89
   9 -12  -1   88.77    3.05
  -9  12  -1   86.52    3.11
  -9  12  -1   84.34    3.05
   9  12   1   86.76    2.93
  -9 -12   1   85.35    3.51
   9  12   1   86.04    3.30
   9 -12  -1   82.22    3.08
 -10 -12  -1    4.63    0.77
 -10 -12  -1    4.40    0.54
  10  12  -1    3.52    0.71
  10 -12   1    2.74    0.62
 -10  12   1    3.26    0.78
 -10 -12  -1    4.02    0.67
 -10  12   1    2.89    0.84
 -10  12   1    4.08    0.81
  10  12  -1    4.32    1.02
  10 -12   1    1.99    1.38
 -10 -12  -1    3.23    0.83
 -10  12   1    5.26    0.71
  10  12   1    3.42    0.59
 -10 -12   1    2.31    0.80
  10 -12  -1    3.72    0.73
  10 -12  -1    3.78    1.63
 -10 -12   1    4.20    0.69
  10 -12  -1    4.31    0.75
 -10  12  -1    4.47    0.63
 -10  12  -1    4.31    0.78
 -10 -12   1    3.39    0.64
  10  12   1    3.97    0.94
 -10 -12   1    3.27    0.77
  11 -12   1   70.42    2.59
 -11  12   1   71.88    2.72
 -11 -12  -1   69.53    3.28
 -11 -12  -1   69.48    2.80
 -11  12   1   69.22    2.64
 -11  12   1   70.73    2.80
  11 -12   1   67.70    3.92
 -11 -12  -1   69.15    2.43
  11  12  -1   71.82    3.05
  11  12  -1   65.44    2.64
  11 -12  -1   65.06    2.69
 -11 -12   1   66.57    2.76
 -11  12  -1   69.93    2.78
 -11 -12   1   68.03    3.30
  11 -12  -1   68.78    4.03
 -11 -12   1   67.12    2.58
  11  12   1   72.28    2.45
 -11  12  -1   68.23    2.54
  11  12   1   69.31    2.98
  12 -12   1   15.34    1.23
 -12  12   1   12.13    1.48
 -12 -12  -1   17.78    1.60
  12 -12   1   15.08    2.73
  12  12  -1   14.93    3.10
  12  12  -1   17.12    1.88
  12  12  -1   15.42    1.39
 -12  12   1   14.74    1.36
 -12  12   1   15.37    1.59
 -12 -12  -1   17.69    2.15
  12  12   1   16.59    2.97
  12 -12  -1   13.17    1.40
 -12 -12   1   14.32    2.05
 -12  12  -1   14.64    1.25
  12  12   1   16.46    1.19
 -12  12  -1   14.59    1.50
 -12 -12   1   14.22    1.29
  12  12   1   15.35    1.74
  12 -12  -1   15.30    2.92
  13 -12   1   73.18    2.73
 -13  12   1   69.43    2.97
  13  12  -1   75.87    3.26
  13  12  -1   68.86    2.76
 -13  12   1   69.51    2.91
  13 -12  -1   65.80    3.08
 -13 -12   1   75.41    2.74
 -13  12  -1   73.56    2.72
  13  12   1   73.62    3.20
   0  13  -1    0.97    0.40
   0 -13  -1    0.53    0.35
   0 -13  -1    0.65    0.46
   0 -13   1    1.56    0.43
   0  13   1    1.10    0.45
   0 -13  -1    1.27    0.42
   0 -13   1    1.37    0.41
   0  13  -1    1.31    0.47
   0 -13   1    0.75    0.36
   0 -13   1    1.02    0.36
   0 -13   1    0.70    0.47
   0  13  -1    1.15    0.39
   0 -13  -1    0.95    0.36
   0  13   1    0.58    0.37
   0  13   1    0.52    0.38
   0  13   1    0.96    0.32
   1 -13   1   76.51    2.72
  -1  13   1   77.14    2.72
   1 -13   1   77.55    2.62
   1  13  -1   79.13    2.67
  -1 -13  -1   75.04    2.69
   1  13  -1   79.29    2.72
  -1  13   1   76.15    2.68
   1 -13   1   77.31    2.72
   1 -13   1   75.32    2.67
   1 -13   1   90.19    2.90
  -1 -13  -1   81.06    2.66
   1 -13   1   82.24    2.99
  -1  13   1   74.88    2.66
  -1 -13  -1   81.51    2.90
   1  13  -1   76.50    2.74
  -1  13   1   76.98    2.69
  -1 -13  -1   75.12    2.64
   1  13   1   78.46    2.65
   1 -13  -1   79.95    2.67
  -1  13  -1   79.69    2.52
   1 -13  -1   82.88    2.93
   1  13   1   78.40    2.75
  -1  13  -1   76.48    2.72
   1 -13  -1   77.59    2.72
  -1 -13   1   77.36    2.67
   1 -13  -1   79.29    2.66
  -1  13  -1   79.03    2.67
  -1 -13   1   78.23    2.70
  -1 -13   1   75.79    2.72
  -1 -13   1   80.70    2.95
   1  13   1   79.74    2.70
   1 -13  -1   82.61    2.68
  -1  13  -1   74.06    2.76
  -1  13  -1   85.43    2.77
   1  13   1   81.32    2.69
  -1 -13   1   78.14    2.63
  -2 -13  -1    6.02    0.70
   2 -13   1    8.38    1.08
   2  13  -1    7.78    0.75
  -2 -13  -1    6.43    0.63
   2  13  -1    7.29    0.87
   2 -13   1    6.30    0.74
  -2 -13  -1    6.45    0.89
   2 -13   1    7.40    0.49
   2  13  -1    6.93    0.60
  -2  13   1    6.71    0.68
   2 -13   1    6.79    0.67
  -2 -13  -1    6.89    0.63
   2 -13   1    6.99    0.81
  -2  13   1    7.01    0.76
   2 -13   1    7.48    0.60
  -2  13   1    7.03    0.67
   2  13  -1    7.32    0.70
  -2 -13   1    7.66    0.75
   2  13   1    7.03    0.33
   2 -13  -1    5.73    0.68
  -2  13  -1    6.52    0.53
   2 -13  -1    7.95    1.04
  -2  13  -1    6.64    0.67
   2 -13  -1    5.62    0.75
  -2 -13   1    8.17    0.70
   2  13   1    7.47    0.62
  -2  13  -1    6.49    0.55
   2  13   1    6.20    0.67
  -2 -13   1    6.73    0.95
  -2  13  -1    6.17    0.59
   2 -13  -1    7.39    0.44
   2  13   1    7.19    0.64
  -2 -13   1    6.08    0.60
  -2  13  -1    7.63    0.73
  -2 -13   1    6.68    0.55
   2  13   1    6.38    0.83
  -3 -13  -1  137.23    4.63
  -3 -13  -1  141.27    4.36
   3  13  -1  139.66    4.39
  -3  13   1  135.87    4.32
   3 -13   1  142.80    4.36
  -3 -13  -1  134.73    4.51
   3 -13   1  134.96    4.42
   3 -13   1  131.82    4.51
   3 -13   1  138.21    4.87
  -3  13   1  135.91    4.45
   3 -13   1  128.57    4.43
   3  13  -1  133.46    4.52
   3  13  -1  134.24    4.43
   3 -13   1  141.31    4.39
   3  13  -1  142.49    4.32
  -3 -13  -1  130.42    4.35
  -3  13   1  133.00    4.39
   3  13  -1  130.10    4.40
   3  13   1  130.67    4.43
   3 -13  -1  119.24    4.47
   3  13   1  129.37    4.51
  -3 -13   1  129.82    4.38
   3 -13  -1  136.82    4.40
  -3  13  -1  139.82    4.27
  -3  13  -1  136.08    4.46
   3  13   1  137.13    4.39
   3  13   1  129.82    4.41
  -3  13  -1  129.89    4.37
  -3  13  -1  136.34    4.38
   3  13   1  133.94    4.19
   3 -13  -1  125.51    4.44
  -3 -13   1  135.78    4.37
   3 -13  -1  139.17    4.25
  -3 -13   1  132.81    4.66
  -3 -13   1  132.92    4.31
  -3  13  -1  135.40    4.31
   3 -13  -1  135.36    4.66
  -3 -13   1  140.66    4.45
  -3  13  -1  138.62    4.45
  -4 -13  -1   42.47    1.91
   4  13  -1   43.24    1.61
   4  13  -1   43.59    1.51
   4 -13   1   42.61    1.60
  -4  13   1   42.55    1.71
   4  13  -1   43.04    1.61
  -4 -13  -1   40.46    1.56
   4 -13   1   41.27    1.80
  -4  13   1   41.13    1.63
   4  13  -1   41.20    1.83
  -4 -13  -1   43.84    1.58
   4 -13   1   40.91    1.65
   4  13  -1   41.86    1.67
   4 -13   1   42.26    2.02
  -4  13   1   42.22    1.50
  -4 -13  -1   42.57    1.54
  -4  13   1   41.94    1.46
  -4  13   1   42.38    1.55
   4 -13   1   40.15    1.60
   4  13   1   41.35    1.51
  -4 -13   1   39.81    1.60
  -4 -13   1   40.44    1.58
  -4 -13   1   41.31    1.67
   4 -13  -1   41.64    1.46
  -4  13  -1   43.46    1.69
  -4  13  -1   41.16    1.55
  -4  13  -1   42.74    1.60
   4  13   1   38.87    1.60
   4  13   1   41.11    1.78
  -4 -13   1   42.60    1.51
   4 -13  -1   39.10    1.67
  -4 -13   1   42.19    1.94
  -4  13  -1   39.78    1.59
  -4  13  -1   40.21    1.67
   4  13   1   45.29    1.59
   4 -13  -1   39.37    1.62
  -5  13   1   70.46    2.55
   5 -13   1   71.55    2.45
   5  13  -1   71.89    2.36
   5 -13   1   67.60    2.47
   5  13  -1   71.48    2.45
   5  13  -1   67.63    2.65
  -5 -13  -1   71.94    2.44
  -5  13   1   70.32    2.28
   5 -13   1   68.04    2.42
  -5  13   1   73.39    2.46
  -5 -13  -1   73.06    2.78
  -5  13   1   71.79    2.33
  -5 -13  -1   70.27    2.38
  -5 -13  -1   70.40    2.39
   5  13  -1   68.92    2.49
  -5  13   1   70.50    2.26
   5  13  -1   72.83    2.47
  -5  13   1   71.05    2.46
  -5 -13  -1   73.79    2.38
   5  13   1   64.98    2.62
   5  13   1   68.54    2.34
  -5  13  -1   66.83    2.42
  -5  13  -1   67.00    2.42
   5  13   1   68.03    2.43
   5  13   1   73.17    2.41
  -5  13  -1   67.78    2.47
  -5  13  -1   66.66    2.42
  -5 -13   1   66.31    2.78
  -5  13  -1   68.45    2.50
  -5 -13   1   67.94    2.37
  -5 -13   1   64.65    2.41
   5 -13  -1   68.31    2.32
   5 -13  -1   67.62    2.52
   5 -13  -1   64.77    2.45
  -6 -13  -1   24.25    1.57
  -6  13   1   25.17    0.95
  -6  13   1   25.24    1.35
   6 -13   1   23.95    2.21
   6  13  -1   23.59    1.17
  -6  13   1   24.17    0.84
  -6  13   1   24.71    0.84
  -6 -13  -1   25.30    1.06
  -6 -13  -1   24.59    1.22
  -6 -13  -1   22.55    1.09
  -6  13   1   24.06    1.25
   6  13  -1   24.58    1.18
   6 -13   1   24.36    1.22
   6 -13   1   26.42    1.18
  -6  13   1   22.78    0.94
   6  13  -1   24.18    1.52
   6  13  -1   23.16    1.24
   6  13  -1   25.27    1.12
  -6 -13  -1   23.66    1.07
  -6  13   1   24.88    1.21
   6 -13   1   26.23    1.17
   6 -13  -1   25.77    1.25
  -6 -13   1   26.10    1.30
  -6 -13   1   24.95    1.62
  -6 -13   1   24.62    1.17
   6  13   1   24.17    1.08
   6  13   1   25.70    1.01
   6 -13  -1   26.86    1.31
  -6  13  -1   23.49    1.16
  -6  13  -1   24.40    1.22
  -6 -13   1   24.28    1.20
  -6  13  -1   27.61    1.20
   6 -13  -1   25.08    1.09
   6  13   1   22.98    1.16
  -6 -13   1   24.48    0.86
  -6  13  -1   24.40    1.27
  -6 -13   1   25.13    1.24
  -6  13  -1   25.91    1.18
   6  13   1   24.17    1.45
  -7 -13  -1   33.45    1.52
  -7  13   1   33.49    1.48
  -7 -13  -1   34.52    1.35
  -7  13   1   34.38    1.54
   7 -13   1   37.16    1.51
   7 -13   1   34.32    2.54
   7  13  -1   32.99    1.52
  -7  13   1   35.11    1.63
   7  13  -1   35.03    1.40
   7  13  -1   33.23    1.45
   7 -13   1   33.81    1.43
   7  13  -1   32.40    1.42
  -7 -13  -1   33.96    1.36
   7  13  -1   32.47    1.79
   7 -13   1   33.07    1.41
  -7 -13  -1   33.80    1.89
  -7 -13   1   33.70    1.91
  -7 -13   1   34.21    1.63
  -7 -13   1   33.03    1.17
  -7  13  -1   34.29    1.44
  -7 -13   1   34.22    1.47
  -7  13  -1   33.93    1.55
  -7 -13   1   34.28    1.57
   7 -13  -1   32.73    2.57
   7  13   1   33.77    1.75
   7 -13  -1   34.00    1.49
   7  13   1   35.91    1.35
   7  13   1   32.34    1.27
   7  13   1   32.19    1.42
  -7  13  -1   33.37    1.51
   7 -13  -1   31.55    1.55
   8 -13   1   22.23    2.43
   8  13  -1   20.71    1.35
  -8  13   1   20.84    1.24
   8  13  -1   21.79    1.22
  -8 -13  -1   23.66    1.32
  -8 -13  -1   22.80    1.71
  -8 -13  -1   23.96    1.09
   8  13  -1   23.46    1.84
  -8 -13  -1   21.68    1.05
  -8  13   1   23.38    1.33
   8 -13   1   21.09    1.28
  -8  13   1   22.13    1.44
   8 -13   1   21.90    1.18
  -8 -13   1   20.72    1.24
  -8  13  -1   22.75    1.29
  -8  13  -1   22.18    1.30
  -8  13  -1   23.09    1.20
   8 -13  -1   20.46    3.01
   8 -13  -1   22.17    1.26
   8 -13  -1   21.47    1.34
  -8 -13   1   22.52    0.97
   8  13   1   23.41    0.87
   8  13   1   21.72    1.12
   8  13   1   18.66    2.04
  -8 -13   1   21.92    1.76
  -8 -13   1   22.48    1.33
  -8  13  -1   21.50    0.94
  -9 -13  -1   21.04    1.37
   9  13  -1   19.46    1.22
   9 -13   1   20.31    2.38
   9  13  -1   19.92    1.27
   9 -13   1   19.48    1.20
  -9 -13  -1   19.37    1.09
  -9  13   1   22.71    1.38
  -9 -13  -1   21.98    1.09
  -9  13   1   21.53    1.52
   9 -13   1   18.96    1.13
   9  13  -1   22.91    1.67
  -9  13   1   19.53    1.25
  -9 -13  -1   20.55    1.75
   9  13   1   20.68    1.60
  -9 -13   1   20.97    1.76
   9  13   1   21.15    1.13
   9 -13  -1   20.39    2.46
  -9  13  -1   20.32    1.31
  -9 -13   1   20.20    1.22
   9 -13  -1   22.52    1.31
  -9  13  -1   20.73    1.18
   9 -13  -1   19.92    1.31
 -10 -13  -1   25.29    1.98
 -10  13   1   25.53    1.93
  10 -13   1   24.16    2.66
  10  13  -1   22.55    1.43
  10  13  -1   25.08    1.89
 -10 -13  -1   25.08    1.51
 -10  13   1   25.07    1.42
 -10  13   1   23.79    1.55
  10 -13   1   25.35    1.38
 -10 -13   1   24.67    1.37
  10 -13  -1   22.14    1.46
  10 -13  -1   25.54    1.46
 -10  13  -1   26.81    1.54
 -10 -13   1   25.41    1.54
  10  13   1   23.02    1.41
 -10  13  -1   23.83    1.33
 -10 -13   1   27.71    2.05
  10  13   1   25.71    1.77
  10 -13  -1   24.20    2.78
 -11 -13  -1    3.29    0.92
  11  13  -1    3.36    0.81
 -11  13   1    3.11    0.77
 -11 -13  -1    3.06    0.59
  11 -13   1    1.66    1.70
 -11 -13  -1    2.46    0.93
  11 -13   1    2.71    0.72
 -11  13   1    3.66    0.94
  11  13  -1    4.32    1.15
 -11  13  -1    3.03    0.70
 -11  13  -1    2.46    0.85
  11 -13  -1    2.40    1.89
 -11 -13   1    1.90    0.84
  11  13   1    3.83    1.10
 -11 -13   1    2.40    0.92
  11 -13  -1    3.90    0.84
 -11 -13   1    3.28    0.74
  11  13   1    2.31    0.63
 -12  13   1   26.93    1.62
  12  13  -1   24.94    1.58
  12 -13   1   25.12    3.10
  12  13  -1   32.03    2.23
 -12 -13  -1   26.48    2.32
 -12 -13  -1   27.96    1.85
  12  13  -1   24.72    3.47
 -12  13   1   28.94    1.88
  12 -13   1   26.16    1.53
  12 -13  -1   25.69    3.30
  12  13   1   25.62    1.70
 -12  13  -1   26.97    1.77
 -12 -13   1   26.09    2.31
  12  13   1   28.07    2.09
 -12 -13   1   26.58    1.78
 -12 -13   1   24.98    1.53
  12 -13  -1   25.81    1.66
 -12  13  -1   21.38    1.48
  12  13   1   25.26    3.29
  13  13  -1    2.27    0.82
  13 -13   1    1.99    0.77
 -13 -13   1    3.05    0.81
 -13  13  -1    2.73    0.80
   0 -14  -1    9.61    0.73
   0 -14   1    9.73    0.67
   0 -14  -1    9.97    0.60
   0 -14   1    8.90    0.78
   0  14  -1    8.94    0.84
   0 -14  -1    9.58    0.70
   0  14   1    9.82    0.84
   0 -14   1    8.97    0.83
   0 -14   1    9.23    1.28
   0  14  -1    9.02    0.82
   0  14   1    9.03    0.78
   0 -14  -1    9.16    0.81
   0  14   1    7.79    0.66
   0 -14  -1    9.81    1.04
   0  14   1    8.57    0.73
   0  14  -1   10.85    0.77
   1  14  -1   16.65    0.90
   1 -14   1   16.67    0.92
  -1 -14  -1   15.40    0.86
   1 -14   1   17.42    1.42
  -1  14   1   16.30    0.99
  -1 -14  -1   15.61    0.93
   1  14  -1   16.60    0.97
  -1 -14  -1   16.26    1.16
  -1 -14  -1   16.71    0.96
   1 -14   1   14.90    0.96
   1  14  -1   14.76    1.02
   1 -14   1   17.10    0.98
   1 -14   1   16.44    0.79
  -1  14   1   14.40    0.91
  -1  14   1   14.63    0.89
  -1  14  -1   15.51    0.91
  -1  14  -1   15.20    0.89
   1  14   1   14.91    0.92
   1 -14  -1   15.17    0.91
  -1  14  -1   15.69    0.97
   1 -14  -1   15.38    0.91
  -1 -14   1   15.43    0.90
   1 -14  -1   14.75    0.97
  -1 -14   1   15.14    0.77
   1  14   1   15.20    1.01
  -1 -14   1   15.18    0.99
  -1  14  -1   16.54    0.65
   1  14   1   16.70    0.87
  -1 -14   1   16.21    1.50
   1  14   1   15.51    0.87
   1 -14  -1   17.15    1.26
   2  14  -1   22.53    1.09
   2 -14   1   22.64    1.09
  -2  14   1   21.60    1.08
  -2  14   1   22.00    1.16
   2 -14   1   22.90    0.94
  -2 -14  -1   21.82    1.04
   2  14  -1   20.53    1.13
  -2 -14  -1   23.53    1.11
  -2  14   1   21.98    1.06
   2 -14   1   24.74    1.23
   2 -14   1   24.15    1.51
   2  14  -1   22.01    1.25
   2 -14   1   21.53    1.14
  -2 -14  -1   22.71    1.35
  -2 -14  -1   20.56    1.03
   2 -14  -1   22.59    0.85
   2  14   1   22.02    0.75
  -2  14  -1   21.48    1.12
   2  14   1   23.68    1.10
  -2 -14   1   22.23    1.16
   2  14   1   23.22    1.23
   2 -14  -1   22.85    1.46
   2  14   1   24.04    1.05
  -2 -14   1   21.34    1.38
  -2 -14   1   21.86    1.11
   2 -14  -1   20.52    1.09
  -2  14  -1   22.36    1.13
   2  14   1   26.72    1.07
  -2  14  -1   21.04    0.96
  -3 -14  -1   13.35    0.83
   3 -14   1   14.45    0.89
   3  14  -1   14.05    0.95
   3 -14   1   15.33    1.36
  -3 -14  -1   13.28    0.83
  -3 -14  -1   13.79    1.15
   3 -14   1   13.05    0.95
  -3  14   1   14.87    0.89
  -3  14   1   13.27    0.88
   3  14  -1   13.61    1.14
  -3  14   1   13.63    0.98
   3 -14   1   14.09    1.08
  -3 -14  -1   14.60    0.93
   3  14  -1   14.86    0.89
   3  14   1   13.30    0.82
   3 -14  -1   13.40    0.64
   3 -14  -1   13.96    1.16
   3  14   1   11.97    0.87
  -3  14  -1   12.99    0.74
  -3 -14   1   12.95    0.88
  -3 -14   1   11.64    0.96
  -3  14  -1   12.87    0.68
  -3  14  -1   12.42    0.87
   3  14   1   13.23    0.83
  -3  14  -1   12.54    1.03
   3 -14  -1   11.96    0.95
  -3 -14   1   13.24    1.19
   3 -14  -1   13.14    0.90
   3  14   1   11.86    1.07
  -3  14  -1   13.38    0.97
   3 -14  -1   14.39    1.34
  -3 -14   1   12.87    0.68
   4  14  -1  135.27    4.78
  -4  14   1  144.42    4.58
  -4  14   1  145.58    4.59
  -4  14   1  140.13    4.50
   4 -14   1  136.01    4.66
   4 -14   1  140.59    4.80
   4 -14   1  139.45    4.61
   4  14  -1  140.14    4.67
  -4  14   1  145.41    4.71
  -4 -14  -1  141.34    4.57
   4  14  -1  143.63    4.62
   4  14  -1  145.16    4.52
  -4  14   1  141.52    4.52
  -4  14   1  133.04    4.62
  -4 -14  -1  136.82    4.58
  -4 -14  -1  141.15    4.90
   4  14  -1  148.91    5.04
   4 -14   1  138.20    4.97
  -4 -14   1  140.32    4.94
  -4 -14   1  156.27    4.80
   4  14   1  133.85    4.61
  -4  14  -1  143.13    4.56
  -4 -14   1  136.34    4.67
  -4 -14   1  136.61    4.61
   4  14   1  138.06    4.78
   4 -14  -1  135.57    4.69
   4  14   1  134.78    4.82
  -4  14  -1  142.59    4.67
  -4  14  -1  136.66    4.39
   4 -14  -1  144.32    4.96
  -4  14  -1  144.45    4.68
   4 -14  -1  143.29    4.49
   4  14   1  145.10    4.62
  -4  14  -1  142.79    4.61
  -4 -14   1  146.86    4.52
   4 -14  -1  144.35    4.64
  -5 -14  -1   50.43    1.77
  -5  14   1   47.71    1.70
   5  14  -1   46.21    1.86
   5  14  -1   46.87    2.08
   5  14  -1   45.98    1.81
   5 -14   1   43.22    1.84
  -5  14   1   47.77    1.93
  -5  14   1   45.58    1.62
  -5 -14  -1   48.57    1.80
   5 -14   1   53.26    1.95
   5  14  -1   50.03    1.69
   5 -14   1   49.46    1.81
  -5  14   1   47.62    1.81
   5  14  -1   47.70    1.83
  -5  14   1   47.59    1.59
  -5 -14  -1   48.30    1.75
  -5 -14  -1   49.24    1.75
  -5 -14  -1   46.92    2.16
  -5  14   1   47.52    1.83
  -5 -14   1   49.43    1.71
   5 -14  -1   48.78    1.68
   5  14   1   46.42    1.69
   5  14   1   43.91    2.04
  -5  14  -1   45.60    1.77
   5 -14  -1   43.06    1.88
  -5 -14   1   45.22    2.18
  -5  14  -1   47.17    1.80
   5  14   1   45.55    1.76
  -5  14  -1   46.44    1.85
  -5  14  -1   47.21    1.89
   5 -14  -1   44.38    1.83
   5  14   1   43.50    1.79
  -5 -14   1   47.29    1.78
  -5  14  -1   45.23    1.79
  -6  14   1    3.03    0.58
  -6  14   1    2.27    0.53
   6  14  -1    1.69    0.46
  -6  14   1    2.01    0.30
  -6  14   1    2.05    0.35
   6 -14   1    1.69    0.55
   6 -14   1    2.60    0.53
  -6 -14  -1    2.61    0.48
  -6 -14  -1    3.52    0.59
  -6 -14  -1    2.34    0.42
  -6  14   1    2.62    0.64
   6  14  -1    2.00    0.55
  -6 -14  -1    2.48    0.41
   6 -14   1    1.65    0.42
   6  14  -1    2.51    0.44
   6  14  -1    2.10    0.81
  -6 -14  -1    1.91    0.62
   6  14  -1    2.32    0.57
  -6 -14   1    2.18    0.47
   6  14   1    3.37    0.80
  -6  14  -1    1.61    0.47
   6 -14  -1    3.33    0.48
   6  14   1    2.40    0.35
  -6 -14   1    1.84    0.66
  -6  14  -1    3.39    0.53
   6  14   1    2.60    0.46
  -6  14  -1    2.25    0.54
  -6 -14   1    2.47    0.64
   6  14   1    2.74    0.55
  -6 -14   1    2.84    0.55
  -6  14  -1    2.21    0.55
   6 -14  -1    2.77    0.61
   6 -14  -1    3.27    0.58
   7  14  -1   41.10    2.04
   7  14  -1   43.10    1.73
   7 -14   1   40.60    1.69
   7 -14   1   41.07    1.75
  -7 -14  -1   42.38    1.76
  -7  14   1   44.84    1.91
  -7 -14  -1   42.95    2.16
  -7  14   1   40.46    1.77
   7  14  -1   41.44    1.77
   7 -14   1   38.91    2.84
  -7  14   1   39.92    1.73
   7  14   1   43.09    1.54
  -7 -14   1   42.29    2.22
   7 -14  -1   39.95    1.80
  -7  14  -1   42.33    1.73
  -7  14  -1   42.08    1.82
  -7  14  -1   41.81    1.69
  -7 -14   1   43.94    1.84
   7 -14  -1   42.94    1.76
  -7 -14   1   40.68    1.38
  -7 -14   1   43.07    1.72
   7  14   1   41.86    2.02
  -7  14  -1   39.77    1.64
   7  14   1   40.85    1.68
  -8 -14  -1   13.15    0.91
   8  14  -1   12.24    1.08
  -8 -14  -1   12.47    1.13
   8  14  -1   13.71    1.47
   8  14  -1   12.99    1.07
   8 -14   1   12.52    1.04
  -8 -14  -1   12.59    1.52
  -8  14   1   11.85    1.26
  -8  14   1   12.65    1.04
   8 -14   1   12.75    1.03
   8 -14   1   11.59    2.20
  -8  14   1   13.59    1.30
  -8 -14   1    9.62    1.03
   8 -14  -1   11.10    1.10
   8  14   1   14.65    1.40
  -8 -14   1   11.95    1.53
   8 -14  -1    9.61    2.27
  -8  14  -1   12.31    1.08
  -8  14  -1   12.14    1.19
   8 -14  -1   13.19    1.09
  -8  14  -1   11.76    0.99
   8  14   1   11.14    0.91
  -8 -14   1   11.47    1.20
  -9 -14  -1   56.63    2.75
  -9  14   1   58.87    2.34
   9  14  -1   57.02    2.63
   9  14  -1   54.36    2.25
  -9  14   1   55.36    2.48
  -9  14   1   57.59    2.26
  -9 -14  -1   59.13    2.33
   9 -14   1   57.86    2.24
   9 -14   1   54.34    3.50
   9  14   1   56.67    2.59
  -9 -14   1   57.32    2.80
  -9  14  -1   58.39    2.31
   9 -14  -1   54.38    2.30
   9 -14  -1   56.44    3.57
  -9 -14   1   59.11    2.23
  -9  14  -1   59.83    2.20
   9 -14  -1   59.26    2.29
  10 -14   1   23.10    2.85
  10  14  -1   22.11    1.45
 -10  14   1   22.33    1.42
  10  14  -1   24.84    1.98
 -10 -14  -1   25.20    1.20
 -10 -14  -1   24.16    2.02
 -10  14   1   23.53    1.56
 -10 -14  -1   25.29    1.53
  10 -14   1   22.44    1.38
  10 -14  -1   18.87    2.88
  10 -14  -1   20.80    1.40
 -10  14  -1   25.06    1.55
 -10 -14   1   23.59    1.37
  10 -14  -1   22.92    1.49
  10  14   1   22.53    1.26
 -10 -14   1   22.56    1.54
 -10 -14   1   23.22    2.07
 -10  14  -1   22.75    1.38
  10  14   1   22.44    1.82
  11 -14   1   94.95    4.99
 -11 -14  -1   99.05    3.25
  11  14  -1  100.05    3.91
 -11  14   1   93.68    3.61
  11 -14   1   92.35    3.43
  11  14  -1   92.16    3.47
 -11 -14  -1   97.10    3.60
 -11  14   1  100.75    3.48
 -11 -14  -1   97.65    4.13
 -11 -14   1   99.36    3.42
  11 -14  -1   93.43    5.02
  11  14   1   98.34    3.30
  11  14   1   91.50    3.79
 -11  14  -1   92.14    3.57
 -11 -14   1   94.59    3.61
  11 -14  -1   93.36    3.53
 -11  14  -1   98.34    3.40
 -11 -14   1   93.93    4.12
  12  14  -1    0.58    0.85
 -12  14   1    3.18    1.00
 -12 -14  -1    2.62    0.94
 -12 -14  -1    1.76    0.99
 -12  14   1    1.28    0.78
  12  14  -1    3.07    1.22
  12 -14   1   -1.07    1.71
  12  14  -1   -0.57    2.04
  12 -14   1    1.11    0.80
  12 -14  -1   -1.40    2.02
 -12 -14   1    0.92    0.91
  12  14   1    3.78    1.85
 -12  14  -1    1.96    0.78
  12 -14  -1    1.97    0.83
 -12  14  -1    0.22    0.86
  12  14   1    3.38    2.00
 -12 -14   1    1.14    0.78
 -12 -14   1    1.48    0.89
 -13  14  -1   40.42    2.18
 -13 -14   1   41.01    2.17
   0 -15   1   47.29    1.86
   0  15  -1   45.85    1.82
   0 -15  -1   47.28    1.85
   0  15   1   45.08    1.77
   0  15  -1   45.42    1.78
   0 -15   1   48.31    2.14
   0 -15  -1   47.75    2.08
   0 -15   1   44.57    1.73
   0 -15   1   48.42    1.81
   0  15  -1   46.17    1.85
   0 -15  -1   46.59    1.61
   0  15   1   43.37    1.82
   0 -15  -1   54.33    1.65
   0 -15   1   48.07    1.79
   0  15   1   46.42    1.86
   0 -15  -1   45.79    1.77
  -1 -15  -1  113.41    3.94
   1 -15   1  108.95    3.69
   1  15  -1  111.97    3.68
  -1 -15  -1  112.40    3.73
   1  15  -1  112.67    3.74
  -1  15   1  111.85    3.74
   1 -15   1  107.83    3.74
   1 -15   1  114.70    4.03
  -1  15   1  113.20    3.70
  -1 -15  -1  105.86    3.66
   1 -15   1  112.98    3.73
  -1  15   1  113.93    3.68
   1 -15   1  112.14    3.64
  -1 -15  -1  115.71    3.66
   1  15  -1  109.90    3.76
   1  15   1  102.99    3.70
  -1 -15   1  111.21    3.62
  -1 -15   1  106.70    3.75
   1 -15  -1  107.51    3.63
  -1  15  -1  110.45    3.75
   1  15   1  113.57    3.67
   1 -15  -1  108.54    3.74
   1  15   1  108.18    3.76
  -1  15  -1  110.14    3.67
   1 -15  -1  114.31    3.99
  -1 -15   1  111.52    3.69
   1 -15  -1  101.73    3.66
   1  15   1  108.11    3.69
  -1  15  -1  110.48    3.68
  -1  15  -1  111.03    3.50
  -2 -15  -1   10.44    0.79
   2 -15   1   10.05    0.90
   2  15  -1    9.78    0.90
  -2 -15  -1   11.42    1.13
   2 -15   1   10.52    0.86
   2  15  -1   10.60    1.06
  -2  15   1    9.75    0.80
   2 -15   1   12.30    1.33
   2 -15   1   11.20    0.66
  -2  15   1   10.37    0.88
  -2 -15  -1   10.87    0.90
   2 -15   1   10.98    0.97
   2  15  -1   10.11    0.85
  -2 -15  -1    9.10    0.79
  -2  15   1    9.95    0.94
   2  15   1    9.60    1.01
   2 -15  -1   10.45    0.87
  -2 -15   1   10.40    0.86
  -2  15  -1    9.98    0.84
   2  15   1    8.71    0.79
   2 -15  -1    8.68    1.03
  -2  15  -1   10.60    0.90
  -2 -15   1   10.16    0.95
  -2 -15   1    9.82    0.65
   2 -15  -1   10.59    1.27
   2  15   1    9.36    0.84
   2 -15  -1   10.42    0.57
  -2  15  -1    9.52    0.72
  -2 -15   1    9.98    1.16
   2 -15  -1   10.74    0.93
   2  15   1   10.46    0.79
   3 -15   1   98.94    3.67
   3 -15   1   97.44    3.44
   3  15  -1   96.12    3.44
  -3 -15  -1   92.31    3.23
  -3  15   1   98.25    3.36
   3  15  -1   95.19    3.33
   3 -15   1   92.06    3.33
  -3 -15  -1  102.35    3.25
   3 -15   1  100.59    3.29
   3  15  -1  100.82    3.29
  -3 -15  -1   99.07    3.31
  -3  15   1   95.46    3.28
  -3 -15  -1   98.88    3.57
  -3  15   1   99.33    3.22
   3  15   1   92.75    3.42
   3 -15  -1   94.50    3.35
   3 -15  -1   97.09    3.10
  -3 -15   1   90.68    3.57
   3  15   1   94.49    3.29
  -3 -15   1   95.54    3.35
   3 -15  -1   97.85    3.29
   3 -15  -1   98.92    3.64
  -3  15  -1   97.73    3.35
  -3  15  -1   95.92    3.16
   3  15   1  102.61    3.25
  -3  15  -1   93.54    3.26
  -3  15  -1   95.36    3.38
  -3 -15   1   98.25    3.15
   3  15   1   96.21    3.28
  -3  15  -1   95.16    3.13
  -3 -15   1   89.20    3.27
  -4  15   1   41.74    1.64
  -4  15   1   46.08    1.72
  -4  15   1   44.52    1.73
  -4  15   1   44.12    1.88
  -4 -15  -1   43.22    1.73
   4  15  -1   45.07    2.02
   4  15  -1   43.70    1.83
  -4 -15  -1   46.94    1.82
  -4 -15  -1   44.67    2.09
  -4 -15  -1   43.52    1.72
   4  15  -1   44.20    1.78
   4 -15   1   46.41    1.79
   4  15  -1   46.28    1.60
   4 -15   1   45.65    2.23
   4 -15   1   43.21    1.82
   4 -15   1   44.35    2.01
  -4  15   1   44.44    1.60
  -4  15   1   43.35    1.78
   4 -15  -1   45.47    1.81
  -4  15  -1   49.05    1.89
  -4 -15   1   48.60    1.63
   4  15   1   44.57    1.98
  -4 -15   1   48.03    1.88
   4 -15  -1   47.64    1.60
   4  15   1   47.54    1.72
   4  15   1   46.77    1.75
  -4  15  -1   46.80    1.88
  -4  15  -1   45.64    1.69
  -4 -15   1   45.87    1.78
  -4 -15   1   44.42    2.15
  -4  15  -1   45.56    1.49
   4 -15  -1   46.13    1.88
  -4  15  -1   45.42    1.77
   4  15   1   41.74    1.77
   4 -15  -1   46.86    2.21
  -5  15   1  170.97    5.29
  -5  15   1  175.36    5.46
   5 -15   1  167.56    5.70
   5  15  -1  168.03    5.34
   5 -15   1  165.68    5.52
  -5 -15  -1  165.78    5.51
  -5  15   1  169.57    5.49
  -5  15   1  155.05    5.30
   5 -15   1  172.13    5.47
  -5 -15  -1  173.32    5.43
  -5 -15  -1  171.32    5.45
  -5  15   1  168.44    5.40
  -5  15   1  170.14    5.57
  -5 -15  -1  172.10    5.82
   5 -15   1  172.68    5.90
   5  15  -1  170.41    5.70
   5  15  -1  159.48    5.51
   5  15  -1  170.36    5.47
  -5 -15  -1  175.95    5.43
  -5  15  -1  164.52    5.46
   5 -15  -1  171.19    5.86
  -5  15  -1  164.75    5.42
   5  15   1  167.53    5.45
   5 -15  -1  162.19    5.48
   5  15   1  164.75    5.47
  -5 -15   1  165.44    5.36
   5  15   1  173.73    5.47
  -5  15  -1  163.76    5.49
  -5 -15   1  166.09    5.83
   5  15   1  163.56    5.67
   5 -15  -1  161.85    5.55
  -5  15  -1  172.34    5.55
   5 -15  -1  169.86    5.35
  -6  15   1   44.92    1.89
  -6 -15  -1   41.71    1.74
  -6  15   1   43.12    1.75
  -6 -15  -1   42.26    1.65
  -6  15   1   40.41    1.52
  -6  15   1   42.34    1.74
   6  15  -1   42.07    2.06
   6  15  -1   38.00    1.77
   6 -15   1   39.52    1.76
  -6 -15  -1   41.86    2.13
   6 -15   1   42.87    1.72
   6  15  -1   42.59    1.74
  -6 -15  -1   40.47    1.65
   6 -15  -1   42.22    1.76
  -6 -15   1   41.85    1.87
  -6  15  -1   42.65    1.74
   6  15   1   43.19    2.00
   6  15   1   43.00    1.58
  -6  15  -1   45.69    1.87
  -6  15  -1   42.06    1.70
  -6  15  -1   42.19    1.72
   6 -15  -1   41.51    1.83
  -6 -15   1   43.14    2.17
   6  15   1   41.77    1.71
  -6 -15   1   43.66    1.74
  -7 -15  -1   16.29    1.15
  -7 -15  -1   18.70    1.60
   7 -15   1   15.44    1.10
   7  15  -1   15.47    1.49
  -7  15   1   16.15    1.14
  -7  15   1   17.95    1.33
   7  15  -1   16.10    1.76
   7  15  -1   16.99    1.13
  -7  15   1   16.36    1.12
   7 -15   1   14.36    1.60
  -7 -15   1   15.13    1.27
   7  15   1   15.64    1.48
  -7  15  -1   14.01    1.10
  -7 -15   1   16.44    1.59
   7 -15  -1   14.87    1.20
   7  15   1   15.64    0.78
  -7  15  -1   11.93    1.48
   7  15   1   13.88    1.02
  -7  15  -1   16.06    1.25
   7 -15  -1   14.37    1.14
  -7  15  -1   15.96    1.05
   8 -15   1   56.20    2.28
  -8  15   1   60.32    2.48
  -8  15   1   59.74    2.40
   8  15  -1   57.93    2.65
  -8  15   1   58.71    2.27
  -8 -15  -1   58.93    2.34
   8 -15   1   57.69    3.62
   8  15  -1   62.24    2.29
  -8 -15  -1   59.59    2.76
   8  15  -1   56.06    2.31
  -8 -15  -1   55.19    2.36
   8 -15   1   57.36    2.27
   8 -15  -1   57.95    2.37
  -8  15  -1   60.43    2.24
  -8 -15   1   59.22    2.26
   8  15   1   57.69    2.60
  -8 -15   1   59.96    2.42
  -8 -15   1   58.96    2.81
   8 -15  -1   60.73    2.32
  -8  15  -1   60.14    2.40
  -9 -15  -1    7.31    0.68
   9 -15   1    5.66    0.78
  -9 -15  -1    8.36    1.17
  -9  15   1    6.24    0.89
  -9  15   1    7.35    0.81
  -9  15   1    7.89    1.03
   9  15  -1    5.98    0.82
   9 -15   1    4.65    1.81
   9  15  -1    9.53    1.60
  -9 -15  -1    5.55    0.98
   9 -15  -1    5.59    0.85
  -9  15  -1    6.01    0.75
   9  15   1    6.71    0.93
  -9 -15   1    6.74    0.80
   9  15   1    8.88    1.24
   9 -15  -1    7.25    0.88
   9 -15  -1    4.76    1.92
  -9  15  -1    6.99    0.87
  -9 -15   1    4.99    0.93
 -10 -15  -1   50.12    1.89
 -10  15   1   50.07    2.11
 -10 -15  -1   50.32    2.71
  10  15  -1   52.25    2.58
 -10 -15  -1   48.73    2.18
 -10  15   1   48.47    2.22
  10 -15   1   47.72    2.06
  10 -15   1   46.92    3.64
  10  15  -1   44.68    2.10
 -10 -15   1   48.75    2.75
  10  15   1   48.41    2.46
  10  15   1   46.84    1.94
 -10  15  -1   47.44    2.04
  10 -15  -1   44.81    3.71
 -10  15  -1   48.43    2.17
  10 -15  -1   43.83    2.16
 -10 -15   1   48.39    2.24
 -10 -15   1   47.82    2.06
  11  15  -1    2.67    0.84
 -11  15   1    1.92    0.80
 -11 -15  -1    2.40    0.95
 -11  15   1    2.92    0.99
  11  15  -1    4.40    1.30
 -11 -15  -1    1.85    1.03
 -11 -15  -1    1.95    0.64
  11 -15   1    2.69    0.81
  11 -15   1    0.07    2.01
  11  15   1    2.82    1.21
 -11 -15   1   -0.04    0.90
 -11  15  -1    2.36    0.89
 -11  15  -1    3.02    0.77
  11 -15  -1   -0.91    2.11
 -11 -15   1    2.71    0.98
  11  15   1    1.34    0.70
  11 -15  -1    2.25    0.89
 -11 -15   1    3.62    0.78
 -12  15   1   17.26    1.93
  12 -15   1   13.72    1.38
  12  15  -1   10.82    1.39
 -12 -15  -1   14.12    1.60
 -12  15  -1   14.30    1.35
  12  15   1   20.09    2.53
 -12  15  -1   15.78    2.09
 -12 -15   1   10.96    1.34
   0 -16  -1  112.95    3.57
   0 -16   1  111.86    3.71
   0 -16  -1  108.61    3.71
   0  16   1  111.52    3.80
   0  16   1  111.88    3.77
   0 -16  -1  108.82    3.78
   0  16  -1  108.37    3.76
   0 -16   1  111.84    4.06
   0  16  -1  108.41    3.79
   0  16   1  115.02    3.72
   0 -16   1  114.29    3.81
   0 -16   1  106.21    3.73
   0 -16  -1  113.92    4.03
   0  16  -1  111.74    3.73
   1  16  -1    4.89    0.61
   1 -16   1    4.93    0.61
   1  16  -1    5.98    0.79
  -1  16   1    4.08    0.62
   1 -16   1    5.71    0.85
  -1  16   1    6.68    0.84
  -1 -16  -1    4.93    0.73
  -1 -16  -1    6.17    0.90
   1 -16   1    6.16    0.91
  -1  16   1    5.42    0.62
   1 -16   1    5.26    0.62
   1  16  -1    6.00    0.67
  -1 -16  -1    5.66    0.76
   1  16   1    4.52    0.58
  -1  16  -1    5.99    0.83
  -1  16  -1    4.79    0.66
  -1  16  -1    5.18    0.61
   1  16   1    5.86    0.94
  -1 -16   1    5.82    1.12
  -1 -16   1    5.46    0.59
  -1 -16   1    5.27    0.69
   1  16   1    6.28    0.46
   1 -16  -1    4.24    0.70
   1 -16  -1    5.83    0.75
   1 -16  -1    5.20    0.68
   1  16   1    3.92    0.58
  -1 -16   1    4.97    0.63
  -1  16  -1    5.09    0.40
   1 -16  -1    5.97    0.81
  -2 -16  -1   69.78    2.44
   2 -16   1   65.79    2.47
  -2  16   1   67.90    2.22
   2 -16   1   67.35    2.45
   2  16  -1   62.57    2.36
  -2 -16  -1   69.78    2.69
  -2  16   1   63.64    2.45
   2  16  -1   64.67    2.43
  -2 -16  -1   65.29    2.34
   2  16  -1   67.75    2.53
   2 -16   1   67.82    2.26
  -2  16   1   67.89    2.35
   2 -16   1   65.37    2.38
  -2  16   1   67.91    2.38
   2 -16   1   68.05    2.80
  -2 -16  -1   65.68    2.42
   2 -16  -1   64.56    2.16
  -2 -16   1   64.20    2.45
   2 -16  -1   56.89    2.43
   2 -16  -1   67.49    2.47
  -2 -16   1   59.46    2.22
   2  16   1   63.25    2.49
  -2  16  -1   67.15    2.20
  -2 -16   1   67.27    2.72
  -2  16  -1   63.81    2.46
  -2  16  -1   65.65    2.30
   2  16   1   61.19    2.37
   2 -16  -1   61.77    2.37
   2  16   1   63.47    2.33
  -2  16  -1   63.49    2.36
  -2 -16   1   65.94    2.38
   2 -16  -1   72.12    2.79
   2  16   1   68.09    2.44
  -3 -16  -1   19.80    1.08
   3 -16   1   20.70    1.14
  -3  16   1   18.94    1.13
   3 -16   1   20.64    1.36
   3  16  -1   20.82    1.38
   3  16  -1   19.88    1.14
   3 -16   1   20.70    1.59
  -3  16   1   20.29    1.00
  -3 -16  -1   20.53    1.44
  -3  16   1   20.57    1.25
   3 -16   1   19.48    1.21
  -3  16   1   20.07    1.04
   3  16  -1   19.06    1.19
  -3 -16  -1   18.20    1.07
  -3 -16  -1   21.29    1.22
   3 -16  -1   21.56    1.16
  -3  16  -1   19.24    1.11
   3  16   1   19.73    1.32
   3  16   1   20.86    1.08
  -3 -16   1   21.29    1.27
   3  16   1   19.78    1.07
   3  16   1   18.67    1.13
  -3 -16   1   18.80    1.46
  -3  16  -1   20.11    1.30
   3 -16  -1   21.20    0.87
  -3  16  -1   21.51    0.94
  -3 -16   1   19.87    1.13
   3 -16  -1   21.87    1.60
  -3 -16   1   20.36    0.89
  -3  16  -1   21.16    0.89
  -3  16  -1   20.16    1.22
   3 -16  -1   19.41    1.21
  -4  16   1   47.42    2.00
   4  16  -1   47.40    1.87
  -4 -16  -1   45.85    1.82
  -4  16   1   47.34    1.69
  -4  16   1   46.97    1.80
   4  16  -1   48.22    1.95
   4 -16   1   49.92    1.89
   4 -16   1   48.93    2.36
   4 -16   1   44.53    1.93
   4 -16   1   49.37    2.14
  -4  16   1   46.13    1.75
  -4 -16  -1   48.35    1.93
  -4 -16  -1   49.20    1.85
   4  16  -1   48.76    2.14
  -4 -16  -1   47.59    2.22
  -4  16   1   45.59    1.88
  -4  16   1   45.98    1.83
  -4 -16   1   55.01    1.69
   4  16   1   46.86    1.88
   4 -16  -1   47.94    1.67
  -4  16  -1   46.80    1.86
  -4  16  -1   47.59    1.99
   4  16   1   44.12    2.08
   4 -16  -1   46.48    1.97
   4  16   1   50.29    1.86
  -4 -16   1   45.84    1.87
  -4  16  -1   47.84    1.76
   4  16   1   48.56    1.82
  -4  16  -1   46.09    1.98
  -4  16  -1   46.88    1.58
   4 -16  -1   48.96    2.35
  -4 -16   1   48.39    2.28
   4 -16  -1   47.66    1.89
  -4 -16   1   47.34    1.99
  -5 -16  -1    9.17    1.31
  -5  16   1    9.56    1.10
   5 -16   1   10.12    1.34
  -5  16   1    9.40    0.54
  -5  16   1    8.58    0.94
   5  16  -1    8.99    0.94
   5 -16   1    8.67    0.94
   5  16  -1   10.48    0.67
  -5  16   1    8.11    0.89
   5  16  -1    7.78    0.97
   5 -16   1    9.51    0.99
   5 -16   1    8.82    1.45
   5  16  -1    8.59    1.30
  -5 -16  -1    9.49    0.96
  -5 -16  -1    9.17    0.87
   5  16   1    8.68    1.05
   5  16   1    9.51    0.83
   5 -16  -1    7.16    0.97
  -5  16  -1    7.55    1.07
  -5 -16   1    8.64    1.31
   5 -16  -1    7.60    1.04
  -5  16  -1    8.69    0.85
  -5  16  -1    8.54    1.09
  -5  16  -1    7.96    0.88
   5  16   1    8.18    0.91
   5  16   1    7.83    0.74
  -6 -16  -1   58.52    2.16
   6 -16   1   56.41    2.14
  -6 -16  -1   56.35    2.06
  -6 -16  -1   56.22    2.15
   6  16  -1   48.69    2.50
   6 -16   1   51.64    2.79
  -6 -16  -1   56.08    2.58
  -6  16   1   59.24    2.14
   6 -16   1   56.26    2.50
   6  16  -1   59.20    2.15
   6  16  -1   45.12    2.47
  -6  16   1   59.27    2.31
  -6  16   1   54.52    2.43
  -6 -16   1   59.44    2.31
   6  16   1   49.94    3.22
   6 -16  -1   57.04    2.17
   6  16   1   55.31    2.05
  -6 -16   1   55.92    2.62
   6 -16  -1   53.60    2.44
  -6  16  -1   56.35    2.17
  -6  16  -1   56.22    2.27
  -6  16  -1   58.06    2.11
  -6  16  -1   49.42    2.41
   6  16   1   54.16    2.11
  -7  16   1   40.53    1.93
  -7  16   1   40.56    1.74
   7 -16   1   39.62    1.74
  -7  16   1   38.18    1.72
   7  16  -1   37.29    1.77
   7  16  -1   39.17    2.12
  -7 -16  -1   42.04    2.22
  -7 -16  -1   41.92    1.77
   7 -16   1   39.53    1.77
   7  16  -1   40.48    1.76
  -7  16  -1   39.77    1.71
  -7  16  -1   37.02    1.68
   7 -16  -1   36.13    1.82
  -7 -16   1   39.14    1.72
  -7  16  -1   37.86    1.68
   7  16   1   38.56    2.02
  -7  16  -1   40.05    1.93
  -7 -16   1   38.29    2.19
   7 -16  -1   40.87    1.76
  -7 -16   1   39.93    1.90
  -8  16   1   17.87    1.52
   8 -16   1   17.00    1.26
   8  16  -1   16.97    1.28
   8  16  -1   18.00    1.69
   8  16  -1   17.08    1.26
   8 -16   1   18.83    1.28
  -8  16   1   17.25    1.30
[truncated: 1,180,337 more chars]
